# Supplementary material for: Dataset of long-term monitoring of ground-dwelling ants (Hymenoptera: Formicidae) in the influence areas of a hydroelectric power plant on the Madeira River in the Amazon Basin
Source: Biodivers Data J. 2018 Apr 2;(6):e24375. doi: 10.3897/BDJ.6.e24375 (PMC5904506; doi:10.3897/BDJ.6.e24375)
Supplement: Supplementary material 2 — A total of 9.165 occurrences in the influence areas of Santo Antônio Hydroelectric Power-Plant. [file bdj-06-e24375-s002.xlsx]

## Sheet: Sheet1
basisOfRecord	eventID	modified	datasetName	type	language	institutionID	institutionCode	license	rightsHolder	dynamicProperties	occurrenceID	recordedBy	recordNumber	sex	lifeStage	reproductiveCondition	preparations	disposition	kingdom	phylum	class	order	family	genus	specificEpithet	scientificName	scientifNameAuthorship	taxonRank	vernacularName	identifiedBy	organismQuantity	organismQuantityType
PreservedSpecimen	Jaci-ParanáMD:Km4:2011:1	2017-09-13	Invertebrate Collection of INPA / Environmental monitoring of ants (Hymenoptera: Formicidae) in the influence areas of Santo Antônio Hydroelectric Power-Plant in Rondônia, Brazil		en	Instituto Nacional de Pesquisas da Amazônia (INPA)	INPA		Instituto Nacional de Pesquisas da Amazônia - INPA / Invertebrate Collection		BR:INPA:HYM:000001	Fernandes, I.O. | Souza, J.L.P.		female	adult	non-reprodutcive	alcohol	in collection / wet vial	Animalia	Arthropoda	Insecta	Hymenoptera	Formicidae	Anochetus	diegensis	Anochetus diegensis Forel, 1912	Forel, 1912	Species	Ant	Fernandes, I.O. | Souza, J.L.P.	1	Individual
PreservedSpecimen	IlhaPedras:km2:2011:1	2017-09-13	Invertebrate Collection of INPA / Environmental monitoring of ants (Hymenoptera: Formicidae) in the influence areas of Santo Antônio Hydroelectric Power-Plant in Rondônia, Brazil		en	Instituto Nacional de Pesquisas da Amazônia (INPA)	INPA		Instituto Nacional de Pesquisas da Amazônia - INPA / Invertebrate Collection		BR:INPA:HYM:000002	Fernandes, I.O. | Souza, J.L.P.		female	adult	non-reprodutcive	alcohol	in collection / wet vial	Animalia	Arthropoda	Insecta	Hymenoptera	Formicidae	Anochetus	diegensis	Anochetus diegensis Forel, 1912	Forel, 1912	Species	Ant	Fernandes, I.O. | Souza, J.L.P.	1	Individual
PreservedSpecimen	Morrinhos:Km2:2011:1	2017-09-13	Invertebrate Collection of INPA / Environmental monitoring of ants (Hymenoptera: Formicidae) in the influence areas of Santo Antônio Hydroelectric Power-Plant in Rondônia, Brazil		en	Instituto Nacional de Pesquisas da Amazônia (INPA)	INPA		Instituto Nacional de Pesquisas da Amazônia - INPA / Invertebrate Collection		BR:INPA:HYM:000003	Fernandes, I.O. | Souza, J.L.P.		female	adult	non-reprodutcive	alcohol	in collection / wet vial	Animalia	Arthropoda	Insecta	Hymenoptera	Formicidae	Anochetus	diegensis	Anochetus diegensis Forel, 1912	Forel, 1912	Species	Ant	Fernandes, I.O. | Souza, J.L.P.	1	Individual
PreservedSpecimen	Jaci-ParanáMD:Km1:2011:1	2017-09-13	Invertebrate Collection of INPA / Environmental monitoring of ants (Hymenoptera: Formicidae) in the influence areas of Santo Antônio Hydroelectric Power-Plant in Rondônia, Brazil		en	Instituto Nacional de Pesquisas da Amazônia (INPA)	INPA		Instituto Nacional de Pesquisas da Amazônia - INPA / Invertebrate Collection		BR:INPA:HYM:000004	Fernandes, I.O. | Souza, J.L.P.		female	adult	non-reprodutcive	alcohol	in collection / wet vial	Animalia	Arthropoda	Insecta	Hymenoptera	Formicidae	Anochetus		Anochetus Mayr, 1861	Mayr, 1861	Genus	Ant	Fernandes, I.O. | Souza, J.L.P.	1	Individual
PreservedSpecimen	Jaci-ParanáMD:Km3:2011:1	2017-09-13	Invertebrate Collection of INPA / Environmental monitoring of ants (Hymenoptera: Formicidae) in the influence areas of Santo Antônio Hydroelectric Power-Plant in Rondônia, Brazil		en	Instituto Nacional de Pesquisas da Amazônia (INPA)	INPA		Instituto Nacional de Pesquisas da Amazônia - INPA / Invertebrate Collection		BR:INPA:HYM:000005	Fernandes, I.O. | Souza, J.L.P.		female	adult	non-reprodutcive	alcohol	in collection / wet vial	Animalia	Arthropoda	Insecta	Hymenoptera	Formicidae	Atta	sexdens	Atta sexdens (Linnaeus, 1758)	(Linnaeus, 1758)	Species	Ant	Fernandes, I.O. | Souza, J.L.P.	1	Individual
PreservedSpecimen	Jaci-ParanáMD:Km3:2011:1	2017-09-13	Invertebrate Collection of INPA / Environmental monitoring of ants (Hymenoptera: Formicidae) in the influence areas of Santo Antônio Hydroelectric Power-Plant in Rondônia, Brazil		en	Instituto Nacional de Pesquisas da Amazônia (INPA)	INPA		Instituto Nacional de Pesquisas da Amazônia - INPA / Invertebrate Collection		BR:INPA:HYM:000006	Fernandes, I.O. | Souza, J.L.P.		female	adult	non-reprodutcive	alcohol	in collection / wet vial	Animalia	Arthropoda	Insecta	Hymenoptera	Formicidae	Atta	sexdens	Atta sexdens (Linnaeus, 1758)	(Linnaeus, 1758)	Species	Ant	Fernandes, I.O. | Souza, J.L.P.	1	Individual
PreservedSpecimen	Jaci-ParanáMD:Km4:2011:1	2017-09-13	Invertebrate Collection of INPA / Environmental monitoring of ants (Hymenoptera: Formicidae) in the influence areas of Santo Antônio Hydroelectric Power-Plant in Rondônia, Brazil		en	Instituto Nacional de Pesquisas da Amazônia (INPA)	INPA		Instituto Nacional de Pesquisas da Amazônia - INPA / Invertebrate Collection		BR:INPA:HYM:000007	Fernandes, I.O. | Souza, J.L.P.		female	adult	non-reprodutcive	alcohol	in collection / wet vial	Animalia	Arthropoda	Insecta	Hymenoptera	Formicidae	Atta	sexdens	Atta sexdens (Linnaeus, 1758)	(Linnaeus, 1758)	Species	Ant	Fernandes, I.O. | Souza, J.L.P.	1	Individual
PreservedSpecimen	Jaci-ParanáMD:Km3:2011:1	2017-09-13	Invertebrate Collection of INPA / Environmental monitoring of ants (Hymenoptera: Formicidae) in the influence areas of Santo Antônio Hydroelectric Power-Plant in Rondônia, Brazil		en	Instituto Nacional de Pesquisas da Amazônia (INPA)	INPA		Instituto Nacional de Pesquisas da Amazônia - INPA / Invertebrate Collection		BR:INPA:HYM:000008	Fernandes, I.O. | Souza, J.L.P.		female	adult	non-reprodutcive	alcohol	in collection / wet vial	Animalia	Arthropoda	Insecta	Hymenoptera	Formicidae	Atta	sexdens	Atta sexdens (Linnaeus, 1758)	(Linnaeus, 1758)	Species	Ant	Fernandes, I.O. | Souza, J.L.P.	1	Individual
PreservedSpecimen	Jaci-ParanáMD:Km3:2011:1	2017-09-13	Invertebrate Collection of INPA / Environmental monitoring of ants (Hymenoptera: Formicidae) in the influence areas of Santo Antônio Hydroelectric Power-Plant in Rondônia, Brazil		en	Instituto Nacional de Pesquisas da Amazônia (INPA)	INPA		Instituto Nacional de Pesquisas da Amazônia - INPA / Invertebrate Collection		BR:INPA:HYM:000009	Fernandes, I.O. | Souza, J.L.P.		female	adult	non-reprodutcive	alcohol	in collection / wet vial	Animalia	Arthropoda	Insecta	Hymenoptera	Formicidae	Atta	sexdens	Atta sexdens (Linnaeus, 1758)	(Linnaeus, 1758)	Species	Ant	Fernandes, I.O. | Souza, J.L.P.	1	Individual
PreservedSpecimen	Jaci-ParanáMD:Km2:2011:1	2017-09-13	Invertebrate Collection of INPA / Environmental monitoring of ants (Hymenoptera: Formicidae) in the influence areas of Santo Antônio Hydroelectric Power-Plant in Rondônia, Brazil		en	Instituto Nacional de Pesquisas da Amazônia (INPA)	INPA		Instituto Nacional de Pesquisas da Amazônia - INPA / Invertebrate Collection		BR:INPA:HYM:000010	Fernandes, I.O. | Souza, J.L.P.		female	adult	non-reprodutcive	alcohol	in collection / wet vial	Animalia	Arthropoda	Insecta	Hymenoptera	Formicidae	Atta	sexdens	Atta sexdens (Linnaeus, 1758)	(Linnaeus, 1758)	Species	Ant	Fernandes, I.O. | Souza, J.L.P.	1	Individual
PreservedSpecimen	Jaci-ParanáMD:Km3:2011:1	2017-09-13	Invertebrate Collection of INPA / Environmental monitoring of ants (Hymenoptera: Formicidae) in the influence areas of Santo Antônio Hydroelectric Power-Plant in Rondônia, Brazil		en	Instituto Nacional de Pesquisas da Amazônia (INPA)	INPA		Instituto Nacional de Pesquisas da Amazônia - INPA / Invertebrate Collection		BR:INPA:HYM:000011	Fernandes, I.O. | Souza, J.L.P.		female	adult	non-reprodutcive	alcohol	in collection / wet vial	Animalia	Arthropoda	Insecta	Hymenoptera	Formicidae	Atta	sexdens	Atta sexdens (Linnaeus, 1758)	(Linnaeus, 1758)	Species	Ant	Fernandes, I.O. | Souza, J.L.P.	1	Individual
PreservedSpecimen	Morrinhos:Km0.5:2011:1	2017-09-13	Invertebrate Collection of INPA / Environmental monitoring of ants (Hymenoptera: Formicidae) in the influence areas of Santo Antônio Hydroelectric Power-Plant in Rondônia, Brazil		en	Instituto Nacional de Pesquisas da Amazônia (INPA)	INPA		Instituto Nacional de Pesquisas da Amazônia - INPA / Invertebrate Collection		BR:INPA:HYM:000012	Fernandes, I.O. | Souza, J.L.P.		female	adult	non-reprodutcive	alcohol	in collection / wet vial	Animalia	Arthropoda	Insecta	Hymenoptera	Formicidae	Azteca		Azteca Forel, 1878	Forel, 1878	Genus	Ant	Fernandes, I.O. | Souza, J.L.P.	1	Individual
PreservedSpecimen	Morrinhos:Km3:2011:1	2017-09-13	Invertebrate Collection of INPA / Environmental monitoring of ants (Hymenoptera: Formicidae) in the influence areas of Santo Antônio Hydroelectric Power-Plant in Rondônia, Brazil		en	Instituto Nacional de Pesquisas da Amazônia (INPA)	INPA		Instituto Nacional de Pesquisas da Amazônia - INPA / Invertebrate Collection		BR:INPA:HYM:000013	Fernandes, I.O. | Souza, J.L.P.		female	adult	non-reprodutcive	alcohol	in collection / wet vial	Animalia	Arthropoda	Insecta	Hymenoptera	Formicidae	Azteca		Azteca Forel, 1878	Forel, 1878	Genus	Ant	Fernandes, I.O. | Souza, J.L.P.	1	Individual
PreservedSpecimen	IlhaBúfalos:km3:2011:1	2017-09-13	Invertebrate Collection of INPA / Environmental monitoring of ants (Hymenoptera: Formicidae) in the influence areas of Santo Antônio Hydroelectric Power-Plant in Rondônia, Brazil		en	Instituto Nacional de Pesquisas da Amazônia (INPA)	INPA		Instituto Nacional de Pesquisas da Amazônia - INPA / Invertebrate Collection		BR:INPA:HYM:000014	Fernandes, I.O. | Souza, J.L.P.		female	adult	non-reprodutcive	alcohol	in collection / wet vial	Animalia	Arthropoda	Insecta	Hymenoptera	Formicidae	Azteca		Azteca Forel, 1878	Forel, 1878	Genus	Ant	Fernandes, I.O. | Souza, J.L.P.	1	Individual
PreservedSpecimen	IlhaBúfalos:km3:2011:1	2017-09-13	Invertebrate Collection of INPA / Environmental monitoring of ants (Hymenoptera: Formicidae) in the influence areas of Santo Antônio Hydroelectric Power-Plant in Rondônia, Brazil		en	Instituto Nacional de Pesquisas da Amazônia (INPA)	INPA		Instituto Nacional de Pesquisas da Amazônia - INPA / Invertebrate Collection		BR:INPA:HYM:000015	Fernandes, I.O. | Souza, J.L.P.		female	adult	non-reprodutcive	alcohol	in collection / wet vial	Animalia	Arthropoda	Insecta	Hymenoptera	Formicidae	Azteca		Azteca Forel, 1878	Forel, 1878	Genus	Ant	Fernandes, I.O. | Souza, J.L.P.	1	Individual
PreservedSpecimen	IlhaBúfalos:km3:2011:1	2017-09-13	Invertebrate Collection of INPA / Environmental monitoring of ants (Hymenoptera: Formicidae) in the influence areas of Santo Antônio Hydroelectric Power-Plant in Rondônia, Brazil		en	Instituto Nacional de Pesquisas da Amazônia (INPA)	INPA		Instituto Nacional de Pesquisas da Amazônia - INPA / Invertebrate Collection		BR:INPA:HYM:000016	Fernandes, I.O. | Souza, J.L.P.		female	adult	non-reprodutcive	alcohol	in collection / wet vial	Animalia	Arthropoda	Insecta	Hymenoptera	Formicidae	Azteca		Azteca Forel, 1878	Forel, 1878	Genus	Ant	Fernandes, I.O. | Souza, J.L.P.	1	Individual
PreservedSpecimen	IlhaBúfalos:km3:2011:1	2017-09-13	Invertebrate Collection of INPA / Environmental monitoring of ants (Hymenoptera: Formicidae) in the influence areas of Santo Antônio Hydroelectric Power-Plant in Rondônia, Brazil		en	Instituto Nacional de Pesquisas da Amazônia (INPA)	INPA		Instituto Nacional de Pesquisas da Amazônia - INPA / Invertebrate Collection		BR:INPA:HYM:000017	Fernandes, I.O. | Souza, J.L.P.		female	adult	non-reprodutcive	alcohol	in collection / wet vial	Animalia	Arthropoda	Insecta	Hymenoptera	Formicidae	Azteca		Azteca Forel, 1878	Forel, 1878	Genus	Ant	Fernandes, I.O. | Souza, J.L.P.	1	Individual
PreservedSpecimen	IlhaBúfalos:km2:2011:1	2017-09-13	Invertebrate Collection of INPA / Environmental monitoring of ants (Hymenoptera: Formicidae) in the influence areas of Santo Antônio Hydroelectric Power-Plant in Rondônia, Brazil		en	Instituto Nacional de Pesquisas da Amazônia (INPA)	INPA		Instituto Nacional de Pesquisas da Amazônia - INPA / Invertebrate Collection		BR:INPA:HYM:000018	Fernandes, I.O. | Souza, J.L.P.		female	adult	non-reprodutcive	alcohol	in collection / wet vial	Animalia	Arthropoda	Insecta	Hymenoptera	Formicidae	Azteca		Azteca Forel, 1878	Forel, 1878	Genus	Ant	Fernandes, I.O. | Souza, J.L.P.	1	Individual
PreservedSpecimen	IlhaBúfalos:km4:2011:1	2017-09-13	Invertebrate Collection of INPA / Environmental monitoring of ants (Hymenoptera: Formicidae) in the influence areas of Santo Antônio Hydroelectric Power-Plant in Rondônia, Brazil		en	Instituto Nacional de Pesquisas da Amazônia (INPA)	INPA		Instituto Nacional de Pesquisas da Amazônia - INPA / Invertebrate Collection		BR:INPA:HYM:000019	Fernandes, I.O. | Souza, J.L.P.		female	adult	non-reprodutcive	alcohol	in collection / wet vial	Animalia	Arthropoda	Insecta	Hymenoptera	Formicidae	Azteca		Azteca Forel, 1878	Forel, 1878	Genus	Ant	Fernandes, I.O. | Souza, J.L.P.	1	Individual
PreservedSpecimen	IlhaBúfalos:km0:2011:1	2017-09-13	Invertebrate Collection of INPA / Environmental monitoring of ants (Hymenoptera: Formicidae) in the influence areas of Santo Antônio Hydroelectric Power-Plant in Rondônia, Brazil		en	Instituto Nacional de Pesquisas da Amazônia (INPA)	INPA		Instituto Nacional de Pesquisas da Amazônia - INPA / Invertebrate Collection		BR:INPA:HYM:000020	Fernandes, I.O. | Souza, J.L.P.		female	adult	non-reprodutcive	alcohol	in collection / wet vial	Animalia	Arthropoda	Insecta	Hymenoptera	Formicidae	Octostruma		Octostruma Forel, 1912	Forel, 1912	Genus	Ant	Fernandes, I.O. | Souza, J.L.P.	1	Individual
PreservedSpecimen	IlhaPedras:km1:2011:1	2017-09-13	Invertebrate Collection of INPA / Environmental monitoring of ants (Hymenoptera: Formicidae) in the influence areas of Santo Antônio Hydroelectric Power-Plant in Rondônia, Brazil		en	Instituto Nacional de Pesquisas da Amazônia (INPA)	INPA		Instituto Nacional de Pesquisas da Amazônia - INPA / Invertebrate Collection		BR:INPA:HYM:000021	Fernandes, I.O. | Souza, J.L.P.		female	adult	non-reprodutcive	alcohol	in collection / wet vial	Animalia	Arthropoda	Insecta	Hymenoptera	Formicidae	Octostruma		Octostruma Forel, 1912	Forel, 1912	Genus	Ant	Fernandes, I.O. | Souza, J.L.P.	1	Individual
PreservedSpecimen	Jaci-ParanáMD:Km4:2011:1	2017-09-13	Invertebrate Collection of INPA / Environmental monitoring of ants (Hymenoptera: Formicidae) in the influence areas of Santo Antônio Hydroelectric Power-Plant in Rondônia, Brazil		en	Instituto Nacional de Pesquisas da Amazônia (INPA)	INPA		Instituto Nacional de Pesquisas da Amazônia - INPA / Invertebrate Collection		BR:INPA:HYM:000022	Fernandes, I.O. | Souza, J.L.P.		female	adult	non-reprodutcive	alcohol	in collection / wet vial	Animalia	Arthropoda	Insecta	Hymenoptera	Formicidae	Octostruma		Octostruma Forel, 1912	Forel, 1912	Genus	Ant	Fernandes, I.O. | Souza, J.L.P.	1	Individual
PreservedSpecimen	IlhaBúfalos:km0.5:2011:1	2017-09-13	Invertebrate Collection of INPA / Environmental monitoring of ants (Hymenoptera: Formicidae) in the influence areas of Santo Antônio Hydroelectric Power-Plant in Rondônia, Brazil		en	Instituto Nacional de Pesquisas da Amazônia (INPA)	INPA		Instituto Nacional de Pesquisas da Amazônia - INPA / Invertebrate Collection		BR:INPA:HYM:000023	Fernandes, I.O. | Souza, J.L.P.		female	adult	non-reprodutcive	alcohol	in collection / wet vial	Animalia	Arthropoda	Insecta	Hymenoptera	Formicidae	Octostruma		Octostruma Forel, 1912	Forel, 1912	Genus	Ant	Fernandes, I.O. | Souza, J.L.P.	1	Individual
PreservedSpecimen	IlhaBúfalos:km0.5:2011:1	2017-09-13	Invertebrate Collection of INPA / Environmental monitoring of ants (Hymenoptera: Formicidae) in the influence areas of Santo Antônio Hydroelectric Power-Plant in Rondônia, Brazil		en	Instituto Nacional de Pesquisas da Amazônia (INPA)	INPA		Instituto Nacional de Pesquisas da Amazônia - INPA / Invertebrate Collection		BR:INPA:HYM:000024	Fernandes, I.O. | Souza, J.L.P.		female	adult	non-reprodutcive	alcohol	in collection / wet vial	Animalia	Arthropoda	Insecta	Hymenoptera	Formicidae	Octostruma		Octostruma Forel, 1912	Forel, 1912	Genus	Ant	Fernandes, I.O. | Souza, J.L.P.	1	Individual
PreservedSpecimen	Jaci-ParanáMD:Km4:2011:1	2017-09-13	Invertebrate Collection of INPA / Environmental monitoring of ants (Hymenoptera: Formicidae) in the influence areas of Santo Antônio Hydroelectric Power-Plant in Rondônia, Brazil		en	Instituto Nacional de Pesquisas da Amazônia (INPA)	INPA		Instituto Nacional de Pesquisas da Amazônia - INPA / Invertebrate Collection		BR:INPA:HYM:000025	Fernandes, I.O. | Souza, J.L.P.		female	adult	non-reprodutcive	alcohol	in collection / wet vial	Animalia	Arthropoda	Insecta	Hymenoptera	Formicidae	Octostruma		Octostruma Forel, 1912	Forel, 1912	Genus	Ant	Fernandes, I.O. | Souza, J.L.P.	1	Individual
PreservedSpecimen	Jaci-ParanáMD:Km4:2011:1	2017-09-13	Invertebrate Collection of INPA / Environmental monitoring of ants (Hymenoptera: Formicidae) in the influence areas of Santo Antônio Hydroelectric Power-Plant in Rondônia, Brazil		en	Instituto Nacional de Pesquisas da Amazônia (INPA)	INPA		Instituto Nacional de Pesquisas da Amazônia - INPA / Invertebrate Collection		BR:INPA:HYM:000026	Fernandes, I.O. | Souza, J.L.P.		female	adult	non-reprodutcive	alcohol	in collection / wet vial	Animalia	Arthropoda	Insecta	Hymenoptera	Formicidae	Octostruma		Octostruma Forel, 1912	Forel, 1912	Genus	Ant	Fernandes, I.O. | Souza, J.L.P.	1	Individual
PreservedSpecimen	Jaci-ParanáMD:Km4:2011:1	2017-09-13	Invertebrate Collection of INPA / Environmental monitoring of ants (Hymenoptera: Formicidae) in the influence areas of Santo Antônio Hydroelectric Power-Plant in Rondônia, Brazil		en	Instituto Nacional de Pesquisas da Amazônia (INPA)	INPA		Instituto Nacional de Pesquisas da Amazônia - INPA / Invertebrate Collection		BR:INPA:HYM:000027	Fernandes, I.O. | Souza, J.L.P.		female	adult	non-reprodutcive	alcohol	in collection / wet vial	Animalia	Arthropoda	Insecta	Hymenoptera	Formicidae	Blepharidatta	brasiliensis	Blepharidatta brasiliensis Wheeler, 1915	Wheeler, 1915	Species	Ant	Fernandes, I.O. | Souza, J.L.P.	1	Individual
PreservedSpecimen	IlhaPedras:km0:2011:1	2017-09-13	Invertebrate Collection of INPA / Environmental monitoring of ants (Hymenoptera: Formicidae) in the influence areas of Santo Antônio Hydroelectric Power-Plant in Rondônia, Brazil		en	Instituto Nacional de Pesquisas da Amazônia (INPA)	INPA		Instituto Nacional de Pesquisas da Amazônia - INPA / Invertebrate Collection		BR:INPA:HYM:000028	Fernandes, I.O. | Souza, J.L.P.		female	adult	non-reprodutcive	alcohol	in collection / wet vial	Animalia	Arthropoda	Insecta	Hymenoptera	Formicidae	Blepharidatta	brasiliensis	Blepharidatta brasiliensis Wheeler, 1915	Wheeler, 1915	Species	Ant	Fernandes, I.O. | Souza, J.L.P.	1	Individual
PreservedSpecimen	IlhaPedras:km2:2011:1	2017-09-13	Invertebrate Collection of INPA / Environmental monitoring of ants (Hymenoptera: Formicidae) in the influence areas of Santo Antônio Hydroelectric Power-Plant in Rondônia, Brazil		en	Instituto Nacional de Pesquisas da Amazônia (INPA)	INPA		Instituto Nacional de Pesquisas da Amazônia - INPA / Invertebrate Collection		BR:INPA:HYM:000029	Fernandes, I.O. | Souza, J.L.P.		female	adult	non-reprodutcive	alcohol	in collection / wet vial	Animalia	Arthropoda	Insecta	Hymenoptera	Formicidae	Blepharidatta	brasiliensis	Blepharidatta brasiliensis Wheeler, 1915	Wheeler, 1915	Species	Ant	Fernandes, I.O. | Souza, J.L.P.	1	Individual
PreservedSpecimen	IlhaBúfalos:km3:2011:1	2017-09-13	Invertebrate Collection of INPA / Environmental monitoring of ants (Hymenoptera: Formicidae) in the influence areas of Santo Antônio Hydroelectric Power-Plant in Rondônia, Brazil		en	Instituto Nacional de Pesquisas da Amazônia (INPA)	INPA		Instituto Nacional de Pesquisas da Amazônia - INPA / Invertebrate Collection		BR:INPA:HYM:000030	Fernandes, I.O. | Souza, J.L.P.		female	adult	non-reprodutcive	alcohol	in collection / wet vial	Animalia	Arthropoda	Insecta	Hymenoptera	Formicidae	Blepharidatta	brasiliensis	Blepharidatta brasiliensis Wheeler, 1915	Wheeler, 1915	Species	Ant	Fernandes, I.O. | Souza, J.L.P.	1	Individual
PreservedSpecimen	Jaci-ParanáMD:Km4:2011:1	2017-09-13	Invertebrate Collection of INPA / Environmental monitoring of ants (Hymenoptera: Formicidae) in the influence areas of Santo Antônio Hydroelectric Power-Plant in Rondônia, Brazil		en	Instituto Nacional de Pesquisas da Amazônia (INPA)	INPA		Instituto Nacional de Pesquisas da Amazônia - INPA / Invertebrate Collection		BR:INPA:HYM:000031	Fernandes, I.O. | Souza, J.L.P.		female	adult	non-reprodutcive	alcohol	in collection / wet vial	Animalia	Arthropoda	Insecta	Hymenoptera	Formicidae	Blepharidatta	brasiliensis	Blepharidatta brasiliensis Wheeler, 1915	Wheeler, 1915	Species	Ant	Fernandes, I.O. | Souza, J.L.P.	1	Individual
PreservedSpecimen	Jaci-ParanáMD:Km1:2011:1	2017-09-13	Invertebrate Collection of INPA / Environmental monitoring of ants (Hymenoptera: Formicidae) in the influence areas of Santo Antônio Hydroelectric Power-Plant in Rondônia, Brazil		en	Instituto Nacional de Pesquisas da Amazônia (INPA)	INPA		Instituto Nacional de Pesquisas da Amazônia - INPA / Invertebrate Collection		BR:INPA:HYM:000032	Fernandes, I.O. | Souza, J.L.P.		female	adult	non-reprodutcive	alcohol	in collection / wet vial	Animalia	Arthropoda	Insecta	Hymenoptera	Formicidae	Blepharidatta	brasiliensis	Blepharidatta brasiliensis Wheeler, 1915	Wheeler, 1915	Species	Ant	Fernandes, I.O. | Souza, J.L.P.	1	Individual
PreservedSpecimen	Jaci-ParanáMD:Km3:2011:1	2017-09-13	Invertebrate Collection of INPA / Environmental monitoring of ants (Hymenoptera: Formicidae) in the influence areas of Santo Antônio Hydroelectric Power-Plant in Rondônia, Brazil		en	Instituto Nacional de Pesquisas da Amazônia (INPA)	INPA		Instituto Nacional de Pesquisas da Amazônia - INPA / Invertebrate Collection		BR:INPA:HYM:000033	Fernandes, I.O. | Souza, J.L.P.		female	adult	non-reprodutcive	alcohol	in collection / wet vial	Animalia	Arthropoda	Insecta	Hymenoptera	Formicidae	Blepharidatta	brasiliensis	Blepharidatta brasiliensis Wheeler, 1915	Wheeler, 1915	Species	Ant	Fernandes, I.O. | Souza, J.L.P.	1	Individual
PreservedSpecimen	Jaci-ParanáMD:Km0:2011:1	2017-09-13	Invertebrate Collection of INPA / Environmental monitoring of ants (Hymenoptera: Formicidae) in the influence areas of Santo Antônio Hydroelectric Power-Plant in Rondônia, Brazil		en	Instituto Nacional de Pesquisas da Amazônia (INPA)	INPA		Instituto Nacional de Pesquisas da Amazônia - INPA / Invertebrate Collection		BR:INPA:HYM:000034	Fernandes, I.O. | Souza, J.L.P.		female	adult	non-reprodutcive	alcohol	in collection / wet vial	Animalia	Arthropoda	Insecta	Hymenoptera	Formicidae	Brachymyrmex		Brachymyrmex Mayr, 1868	Mayr, 1868	Genus	Ant	Fernandes, I.O. | Souza, J.L.P.	1	Individual
PreservedSpecimen	Jaci-ParanáMD:Km4:2011:1	2017-09-13	Invertebrate Collection of INPA / Environmental monitoring of ants (Hymenoptera: Formicidae) in the influence areas of Santo Antônio Hydroelectric Power-Plant in Rondônia, Brazil		en	Instituto Nacional de Pesquisas da Amazônia (INPA)	INPA		Instituto Nacional de Pesquisas da Amazônia - INPA / Invertebrate Collection		BR:INPA:HYM:000035	Fernandes, I.O. | Souza, J.L.P.		female	adult	non-reprodutcive	alcohol	in collection / wet vial	Animalia	Arthropoda	Insecta	Hymenoptera	Formicidae	Brachymyrmex		Brachymyrmex Mayr, 1868	Mayr, 1868	Genus	Ant	Fernandes, I.O. | Souza, J.L.P.	1	Individual
PreservedSpecimen	Jaci-ParanáMD:Km0:2011:1	2017-09-13	Invertebrate Collection of INPA / Environmental monitoring of ants (Hymenoptera: Formicidae) in the influence areas of Santo Antônio Hydroelectric Power-Plant in Rondônia, Brazil		en	Instituto Nacional de Pesquisas da Amazônia (INPA)	INPA		Instituto Nacional de Pesquisas da Amazônia - INPA / Invertebrate Collection		BR:INPA:HYM:000036	Fernandes, I.O. | Souza, J.L.P.		female	adult	non-reprodutcive	alcohol	in collection / wet vial	Animalia	Arthropoda	Insecta	Hymenoptera	Formicidae	Brachymyrmex		Brachymyrmex Mayr, 1868	Mayr, 1868	Genus	Ant	Fernandes, I.O. | Souza, J.L.P.	1	Individual
PreservedSpecimen	Jaci-ParanáMD:Km1:2011:1	2017-09-13	Invertebrate Collection of INPA / Environmental monitoring of ants (Hymenoptera: Formicidae) in the influence areas of Santo Antônio Hydroelectric Power-Plant in Rondônia, Brazil		en	Instituto Nacional de Pesquisas da Amazônia (INPA)	INPA		Instituto Nacional de Pesquisas da Amazônia - INPA / Invertebrate Collection		BR:INPA:HYM:000037	Fernandes, I.O. | Souza, J.L.P.		female	adult	non-reprodutcive	alcohol	in collection / wet vial	Animalia	Arthropoda	Insecta	Hymenoptera	Formicidae	Brachymyrmex		Brachymyrmex Mayr, 1868	Mayr, 1868	Genus	Ant	Fernandes, I.O. | Souza, J.L.P.	1	Individual
PreservedSpecimen	Jaci-ParanáMD:Km1:2011:1	2017-09-13	Invertebrate Collection of INPA / Environmental monitoring of ants (Hymenoptera: Formicidae) in the influence areas of Santo Antônio Hydroelectric Power-Plant in Rondônia, Brazil		en	Instituto Nacional de Pesquisas da Amazônia (INPA)	INPA		Instituto Nacional de Pesquisas da Amazônia - INPA / Invertebrate Collection		BR:INPA:HYM:000038	Fernandes, I.O. | Souza, J.L.P.		female	adult	non-reprodutcive	alcohol	in collection / wet vial	Animalia	Arthropoda	Insecta	Hymenoptera	Formicidae	Brachymyrmex		Brachymyrmex Mayr, 1868	Mayr, 1868	Genus	Ant	Fernandes, I.O. | Souza, J.L.P.	1	Individual
PreservedSpecimen	Jaci-ParanáMD:Km1:2011:1	2017-09-13	Invertebrate Collection of INPA / Environmental monitoring of ants (Hymenoptera: Formicidae) in the influence areas of Santo Antônio Hydroelectric Power-Plant in Rondônia, Brazil		en	Instituto Nacional de Pesquisas da Amazônia (INPA)	INPA		Instituto Nacional de Pesquisas da Amazônia - INPA / Invertebrate Collection		BR:INPA:HYM:000039	Fernandes, I.O. | Souza, J.L.P.		female	adult	non-reprodutcive	alcohol	in collection / wet vial	Animalia	Arthropoda	Insecta	Hymenoptera	Formicidae	Brachymyrmex		Brachymyrmex Mayr, 1868	Mayr, 1868	Genus	Ant	Fernandes, I.O. | Souza, J.L.P.	1	Individual
PreservedSpecimen	IlhaPedras:km1:2011:1	2017-09-13	Invertebrate Collection of INPA / Environmental monitoring of ants (Hymenoptera: Formicidae) in the influence areas of Santo Antônio Hydroelectric Power-Plant in Rondônia, Brazil		en	Instituto Nacional de Pesquisas da Amazônia (INPA)	INPA		Instituto Nacional de Pesquisas da Amazônia - INPA / Invertebrate Collection		BR:INPA:HYM:000040	Fernandes, I.O. | Souza, J.L.P.		female	adult	non-reprodutcive	alcohol	in collection / wet vial	Animalia	Arthropoda	Insecta	Hymenoptera	Formicidae	Brachymyrmex		Brachymyrmex Mayr, 1868	Mayr, 1868	Genus	Ant	Fernandes, I.O. | Souza, J.L.P.	1	Individual
PreservedSpecimen	IlhaPedras:km2:2011:1	2017-09-13	Invertebrate Collection of INPA / Environmental monitoring of ants (Hymenoptera: Formicidae) in the influence areas of Santo Antônio Hydroelectric Power-Plant in Rondônia, Brazil		en	Instituto Nacional de Pesquisas da Amazônia (INPA)	INPA		Instituto Nacional de Pesquisas da Amazônia - INPA / Invertebrate Collection		BR:INPA:HYM:000041	Fernandes, I.O. | Souza, J.L.P.		female	adult	non-reprodutcive	alcohol	in collection / wet vial	Animalia	Arthropoda	Insecta	Hymenoptera	Formicidae	Brachymyrmex		Brachymyrmex Mayr, 1868	Mayr, 1868	Genus	Ant	Fernandes, I.O. | Souza, J.L.P.	1	Individual
PreservedSpecimen	IlhaBúfalos:km0.5:2011:1	2017-09-13	Invertebrate Collection of INPA / Environmental monitoring of ants (Hymenoptera: Formicidae) in the influence areas of Santo Antônio Hydroelectric Power-Plant in Rondônia, Brazil		en	Instituto Nacional de Pesquisas da Amazônia (INPA)	INPA		Instituto Nacional de Pesquisas da Amazônia - INPA / Invertebrate Collection		BR:INPA:HYM:000042	Fernandes, I.O. | Souza, J.L.P.		female	adult	non-reprodutcive	alcohol	in collection / wet vial	Animalia	Arthropoda	Insecta	Hymenoptera	Formicidae	Brachymyrmex		Brachymyrmex Mayr, 1868	Mayr, 1868	Genus	Ant	Fernandes, I.O. | Souza, J.L.P.	1	Individual
PreservedSpecimen	IlhaPedras:km4:2011:1	2017-09-13	Invertebrate Collection of INPA / Environmental monitoring of ants (Hymenoptera: Formicidae) in the influence areas of Santo Antônio Hydroelectric Power-Plant in Rondônia, Brazil		en	Instituto Nacional de Pesquisas da Amazônia (INPA)	INPA		Instituto Nacional de Pesquisas da Amazônia - INPA / Invertebrate Collection		BR:INPA:HYM:000043	Fernandes, I.O. | Souza, J.L.P.		female	adult	non-reprodutcive	alcohol	in collection / wet vial	Animalia	Arthropoda	Insecta	Hymenoptera	Formicidae	Brachymyrmex		Brachymyrmex Mayr, 1868	Mayr, 1868	Genus	Ant	Fernandes, I.O. | Souza, J.L.P.	1	Individual
PreservedSpecimen	IlhaPedras:km1:2011:1	2017-09-13	Invertebrate Collection of INPA / Environmental monitoring of ants (Hymenoptera: Formicidae) in the influence areas of Santo Antônio Hydroelectric Power-Plant in Rondônia, Brazil		en	Instituto Nacional de Pesquisas da Amazônia (INPA)	INPA		Instituto Nacional de Pesquisas da Amazônia - INPA / Invertebrate Collection		BR:INPA:HYM:000044	Fernandes, I.O. | Souza, J.L.P.		female	adult	non-reprodutcive	alcohol	in collection / wet vial	Animalia	Arthropoda	Insecta	Hymenoptera	Formicidae	Brachymyrmex		Brachymyrmex Mayr, 1868	Mayr, 1868	Genus	Ant	Fernandes, I.O. | Souza, J.L.P.	1	Individual
PreservedSpecimen	IlhaPedras:km2:2011:1	2017-09-13	Invertebrate Collection of INPA / Environmental monitoring of ants (Hymenoptera: Formicidae) in the influence areas of Santo Antônio Hydroelectric Power-Plant in Rondônia, Brazil		en	Instituto Nacional de Pesquisas da Amazônia (INPA)	INPA		Instituto Nacional de Pesquisas da Amazônia - INPA / Invertebrate Collection		BR:INPA:HYM:000045	Fernandes, I.O. | Souza, J.L.P.		female	adult	non-reprodutcive	alcohol	in collection / wet vial	Animalia	Arthropoda	Insecta	Hymenoptera	Formicidae	Brachymyrmex		Brachymyrmex Mayr, 1868	Mayr, 1868	Genus	Ant	Fernandes, I.O. | Souza, J.L.P.	1	Individual
PreservedSpecimen	IlhaBúfalos:km0.5:2011:1	2017-09-13	Invertebrate Collection of INPA / Environmental monitoring of ants (Hymenoptera: Formicidae) in the influence areas of Santo Antônio Hydroelectric Power-Plant in Rondônia, Brazil		en	Instituto Nacional de Pesquisas da Amazônia (INPA)	INPA		Instituto Nacional de Pesquisas da Amazônia - INPA / Invertebrate Collection		BR:INPA:HYM:000046	Fernandes, I.O. | Souza, J.L.P.		female	adult	non-reprodutcive	alcohol	in collection / wet vial	Animalia	Arthropoda	Insecta	Hymenoptera	Formicidae	Brachymyrmex		Brachymyrmex Mayr, 1868	Mayr, 1868	Genus	Ant	Fernandes, I.O. | Souza, J.L.P.	1	Individual
PreservedSpecimen	Jaci-ParanáMD:Km3:2011:1	2017-09-13	Invertebrate Collection of INPA / Environmental monitoring of ants (Hymenoptera: Formicidae) in the influence areas of Santo Antônio Hydroelectric Power-Plant in Rondônia, Brazil		en	Instituto Nacional de Pesquisas da Amazônia (INPA)	INPA		Instituto Nacional de Pesquisas da Amazônia - INPA / Invertebrate Collection		BR:INPA:HYM:000047	Fernandes, I.O. | Souza, J.L.P.		female	adult	non-reprodutcive	alcohol	in collection / wet vial	Animalia	Arthropoda	Insecta	Hymenoptera	Formicidae	Camponotus	crassus	Camponotus crassus Mayr, 1862	Mayr, 1862	Species	Ant	Fernandes, I.O. | Souza, J.L.P.	1	Individual
PreservedSpecimen	IlhaPedras:km0:2011:1	2017-09-13	Invertebrate Collection of INPA / Environmental monitoring of ants (Hymenoptera: Formicidae) in the influence areas of Santo Antônio Hydroelectric Power-Plant in Rondônia, Brazil		en	Instituto Nacional de Pesquisas da Amazônia (INPA)	INPA		Instituto Nacional de Pesquisas da Amazônia - INPA / Invertebrate Collection		BR:INPA:HYM:000048	Fernandes, I.O. | Souza, J.L.P.		female	adult	non-reprodutcive	alcohol	in collection / wet vial	Animalia	Arthropoda	Insecta	Hymenoptera	Formicidae	Camponotus	crassus	Camponotus crassus Mayr, 1862	Mayr, 1862	Species	Ant	Fernandes, I.O. | Souza, J.L.P.	1	Individual
PreservedSpecimen	Jaci-ParanáMD:Km4:2011:1	2017-09-13	Invertebrate Collection of INPA / Environmental monitoring of ants (Hymenoptera: Formicidae) in the influence areas of Santo Antônio Hydroelectric Power-Plant in Rondônia, Brazil		en	Instituto Nacional de Pesquisas da Amazônia (INPA)	INPA		Instituto Nacional de Pesquisas da Amazônia - INPA / Invertebrate Collection		BR:INPA:HYM:000049	Fernandes, I.O. | Souza, J.L.P.		female	adult	non-reprodutcive	alcohol	in collection / wet vial	Animalia	Arthropoda	Insecta	Hymenoptera	Formicidae	Camponotus	crassus	Camponotus crassus Mayr, 1862	Mayr, 1862	Species	Ant	Fernandes, I.O. | Souza, J.L.P.	1	Individual
PreservedSpecimen	Jaci-ParanáMD:Km1:2011:1	2017-09-13	Invertebrate Collection of INPA / Environmental monitoring of ants (Hymenoptera: Formicidae) in the influence areas of Santo Antônio Hydroelectric Power-Plant in Rondônia, Brazil		en	Instituto Nacional de Pesquisas da Amazônia (INPA)	INPA		Instituto Nacional de Pesquisas da Amazônia - INPA / Invertebrate Collection		BR:INPA:HYM:000050	Fernandes, I.O. | Souza, J.L.P.		female	adult	non-reprodutcive	alcohol	in collection / wet vial	Animalia	Arthropoda	Insecta	Hymenoptera	Formicidae	Camponotus	rectangularis	Camponotus rectangularis Emery, 1890	Emery, 1890	Species	Ant	Fernandes, I.O. | Souza, J.L.P.	1	Individual
PreservedSpecimen	IlhaBúfalos:km2:2011:1	2017-09-13	Invertebrate Collection of INPA / Environmental monitoring of ants (Hymenoptera: Formicidae) in the influence areas of Santo Antônio Hydroelectric Power-Plant in Rondônia, Brazil		en	Instituto Nacional de Pesquisas da Amazônia (INPA)	INPA		Instituto Nacional de Pesquisas da Amazônia - INPA / Invertebrate Collection		BR:INPA:HYM:000051	Fernandes, I.O. | Souza, J.L.P.		female	adult	non-reprodutcive	alcohol	in collection / wet vial	Animalia	Arthropoda	Insecta	Hymenoptera	Formicidae	Camponotus	sericeiventris	Camponotus sericeiventris (Guérin-Méneville, 1838)	(Guérin-Méneville, 1838)	Species	Ant	Fernandes, I.O. | Souza, J.L.P.	1	Individual
PreservedSpecimen	IlhaBúfalos:km0.5:2011:1	2017-09-13	Invertebrate Collection of INPA / Environmental monitoring of ants (Hymenoptera: Formicidae) in the influence areas of Santo Antônio Hydroelectric Power-Plant in Rondônia, Brazil		en	Instituto Nacional de Pesquisas da Amazônia (INPA)	INPA		Instituto Nacional de Pesquisas da Amazônia - INPA / Invertebrate Collection		BR:INPA:HYM:000052	Fernandes, I.O. | Souza, J.L.P.		female	adult	non-reprodutcive	alcohol	in collection / wet vial	Animalia	Arthropoda	Insecta	Hymenoptera	Formicidae	Camponotus	sericeiventris	Camponotus sericeiventris (Guérin-Méneville, 1838)	(Guérin-Méneville, 1838)	Species	Ant	Fernandes, I.O. | Souza, J.L.P.	1	Individual
PreservedSpecimen	IlhaBúfalos:km1:2011:1	2017-09-13	Invertebrate Collection of INPA / Environmental monitoring of ants (Hymenoptera: Formicidae) in the influence areas of Santo Antônio Hydroelectric Power-Plant in Rondônia, Brazil		en	Instituto Nacional de Pesquisas da Amazônia (INPA)	INPA		Instituto Nacional de Pesquisas da Amazônia - INPA / Invertebrate Collection		BR:INPA:HYM:000053	Fernandes, I.O. | Souza, J.L.P.		female	adult	non-reprodutcive	alcohol	in collection / wet vial	Animalia	Arthropoda	Insecta	Hymenoptera	Formicidae	Camponotus	fastigatus	Camponotus fastigatus Roger, 1863	Roger, 1863	Species	Ant	Fernandes, I.O. | Souza, J.L.P.	1	Individual
PreservedSpecimen	IlhaBúfalos:km4:2011:1	2017-09-13	Invertebrate Collection of INPA / Environmental monitoring of ants (Hymenoptera: Formicidae) in the influence areas of Santo Antônio Hydroelectric Power-Plant in Rondônia, Brazil		en	Instituto Nacional de Pesquisas da Amazônia (INPA)	INPA		Instituto Nacional de Pesquisas da Amazônia - INPA / Invertebrate Collection		BR:INPA:HYM:000054	Fernandes, I.O. | Souza, J.L.P.		female	adult	non-reprodutcive	alcohol	in collection / wet vial	Animalia	Arthropoda	Insecta	Hymenoptera	Formicidae	Camponotus	fastigatus	Camponotus fastigatus Roger, 1863	Roger, 1863	Species	Ant	Fernandes, I.O. | Souza, J.L.P.	1	Individual
PreservedSpecimen	Jaci-ParanáMD:Km4:2011:1	2017-09-13	Invertebrate Collection of INPA / Environmental monitoring of ants (Hymenoptera: Formicidae) in the influence areas of Santo Antônio Hydroelectric Power-Plant in Rondônia, Brazil		en	Instituto Nacional de Pesquisas da Amazônia (INPA)	INPA		Instituto Nacional de Pesquisas da Amazônia - INPA / Invertebrate Collection		BR:INPA:HYM:000055	Fernandes, I.O. | Souza, J.L.P.		female	adult	non-reprodutcive	alcohol	in collection / wet vial	Animalia	Arthropoda	Insecta	Hymenoptera	Formicidae	Camponotus	fastigatus	Camponotus fastigatus Roger, 1863	Roger, 1863	Species	Ant	Fernandes, I.O. | Souza, J.L.P.	1	Individual
PreservedSpecimen	IlhaPedras:km0.5:2011:1	2017-09-13	Invertebrate Collection of INPA / Environmental monitoring of ants (Hymenoptera: Formicidae) in the influence areas of Santo Antônio Hydroelectric Power-Plant in Rondônia, Brazil		en	Instituto Nacional de Pesquisas da Amazônia (INPA)	INPA		Instituto Nacional de Pesquisas da Amazônia - INPA / Invertebrate Collection		BR:INPA:HYM:000056	Fernandes, I.O. | Souza, J.L.P.		female	adult	non-reprodutcive	alcohol	in collection / wet vial	Animalia	Arthropoda	Insecta	Hymenoptera	Formicidae	Camponotus	fastigatus	Camponotus fastigatus Roger, 1863	Roger, 1863	Species	Ant	Fernandes, I.O. | Souza, J.L.P.	1	Individual
PreservedSpecimen	Jaci-ParanáMD:Km3:2011:1	2017-09-13	Invertebrate Collection of INPA / Environmental monitoring of ants (Hymenoptera: Formicidae) in the influence areas of Santo Antônio Hydroelectric Power-Plant in Rondônia, Brazil		en	Instituto Nacional de Pesquisas da Amazônia (INPA)	INPA		Instituto Nacional de Pesquisas da Amazônia - INPA / Invertebrate Collection		BR:INPA:HYM:000057	Fernandes, I.O. | Souza, J.L.P.		female	adult	non-reprodutcive	alcohol	in collection / wet vial	Animalia	Arthropoda	Insecta	Hymenoptera	Formicidae	Camponotus	fastigatus	Camponotus fastigatus Roger, 1863	Roger, 1863	Species	Ant	Fernandes, I.O. | Souza, J.L.P.	1	Individual
PreservedSpecimen	Jaci-ParanáMD:Km4:2011:1	2017-09-13	Invertebrate Collection of INPA / Environmental monitoring of ants (Hymenoptera: Formicidae) in the influence areas of Santo Antônio Hydroelectric Power-Plant in Rondônia, Brazil		en	Instituto Nacional de Pesquisas da Amazônia (INPA)	INPA		Instituto Nacional de Pesquisas da Amazônia - INPA / Invertebrate Collection		BR:INPA:HYM:000058	Fernandes, I.O. | Souza, J.L.P.		female	adult	non-reprodutcive	alcohol	in collection / wet vial	Animalia	Arthropoda	Insecta	Hymenoptera	Formicidae	Camponotus	fastigatus	Camponotus fastigatus Roger, 1863	Roger, 1863	Species	Ant	Fernandes, I.O. | Souza, J.L.P.	1	Individual
PreservedSpecimen	Jaci-ParanáMD:Km4:2011:1	2017-09-13	Invertebrate Collection of INPA / Environmental monitoring of ants (Hymenoptera: Formicidae) in the influence areas of Santo Antônio Hydroelectric Power-Plant in Rondônia, Brazil		en	Instituto Nacional de Pesquisas da Amazônia (INPA)	INPA		Instituto Nacional de Pesquisas da Amazônia - INPA / Invertebrate Collection		BR:INPA:HYM:000059	Fernandes, I.O. | Souza, J.L.P.		female	adult	non-reprodutcive	alcohol	in collection / wet vial	Animalia	Arthropoda	Insecta	Hymenoptera	Formicidae	Camponotus	blandus	Camponotus blandus (Smith, 1858)	(Smith, 1858)	Species	Ant	Fernandes, I.O. | Souza, J.L.P.	1	Individual
PreservedSpecimen	IlhaBúfalos:km0.5:2011:1	2017-09-13	Invertebrate Collection of INPA / Environmental monitoring of ants (Hymenoptera: Formicidae) in the influence areas of Santo Antônio Hydroelectric Power-Plant in Rondônia, Brazil		en	Instituto Nacional de Pesquisas da Amazônia (INPA)	INPA		Instituto Nacional de Pesquisas da Amazônia - INPA / Invertebrate Collection		BR:INPA:HYM:000060	Fernandes, I.O. | Souza, J.L.P.		female	adult	non-reprodutcive	alcohol	in collection / wet vial	Animalia	Arthropoda	Insecta	Hymenoptera	Formicidae	Carebara		Carebara Westwood, 1840	Westwood, 1840	Genus	Ant	Fernandes, I.O. | Souza, J.L.P.	1	Individual
PreservedSpecimen	IlhaPedras:km0.5:2011:1	2017-09-13	Invertebrate Collection of INPA / Environmental monitoring of ants (Hymenoptera: Formicidae) in the influence areas of Santo Antônio Hydroelectric Power-Plant in Rondônia, Brazil		en	Instituto Nacional de Pesquisas da Amazônia (INPA)	INPA		Instituto Nacional de Pesquisas da Amazônia - INPA / Invertebrate Collection		BR:INPA:HYM:000061	Fernandes, I.O. | Souza, J.L.P.		female	adult	non-reprodutcive	alcohol	in collection / wet vial	Animalia	Arthropoda	Insecta	Hymenoptera	Formicidae	Cephalotes	atratus	Cephalotes atratus (Linnaeus, 1758)	(Linnaeus, 1758)	Species	Ant	Fernandes, I.O. | Souza, J.L.P.	1	Individual
PreservedSpecimen	Morrinhos:Km0:2011:1	2017-09-13	Invertebrate Collection of INPA / Environmental monitoring of ants (Hymenoptera: Formicidae) in the influence areas of Santo Antônio Hydroelectric Power-Plant in Rondônia, Brazil		en	Instituto Nacional de Pesquisas da Amazônia (INPA)	INPA		Instituto Nacional de Pesquisas da Amazônia - INPA / Invertebrate Collection		BR:INPA:HYM:000062	Fernandes, I.O. | Souza, J.L.P.		female	adult	non-reprodutcive	alcohol	in collection / wet vial	Animalia	Arthropoda	Insecta	Hymenoptera	Formicidae	Cephalotes	minutus	Cephalotes minutus (Fabricius, 1804)	(Fabricius, 1804)	Species	Ant	Fernandes, I.O. | Souza, J.L.P.	1	Individual
PreservedSpecimen	IlhaPedras:km0:2011:1	2017-09-13	Invertebrate Collection of INPA / Environmental monitoring of ants (Hymenoptera: Formicidae) in the influence areas of Santo Antônio Hydroelectric Power-Plant in Rondônia, Brazil		en	Instituto Nacional de Pesquisas da Amazônia (INPA)	INPA		Instituto Nacional de Pesquisas da Amazônia - INPA / Invertebrate Collection		BR:INPA:HYM:000063	Fernandes, I.O. | Souza, J.L.P.		female	adult	non-reprodutcive	alcohol	in collection / wet vial	Animalia	Arthropoda	Insecta	Hymenoptera	Formicidae	Cephalotes	pusillus	Cephalotes pusillus (Klug, 1824)	(Klug, 1824)	Species	Ant	Fernandes, I.O. | Souza, J.L.P.	1	Individual
PreservedSpecimen	Morrinhos:Km0.5:2011:1	2017-09-13	Invertebrate Collection of INPA / Environmental monitoring of ants (Hymenoptera: Formicidae) in the influence areas of Santo Antônio Hydroelectric Power-Plant in Rondônia, Brazil		en	Instituto Nacional de Pesquisas da Amazônia (INPA)	INPA		Instituto Nacional de Pesquisas da Amazônia - INPA / Invertebrate Collection		BR:INPA:HYM:000064	Fernandes, I.O. | Souza, J.L.P.		female	adult	non-reprodutcive	alcohol	in collection / wet vial	Animalia	Arthropoda	Insecta	Hymenoptera	Formicidae	Cephalotes		Cephalotes Latreille, 1802	Latreille, 1802	Genus	Ant	Fernandes, I.O. | Souza, J.L.P.	1	Individual
PreservedSpecimen	IlhaPedras:km3:2011:1	2017-09-13	Invertebrate Collection of INPA / Environmental monitoring of ants (Hymenoptera: Formicidae) in the influence areas of Santo Antônio Hydroelectric Power-Plant in Rondônia, Brazil		en	Instituto Nacional de Pesquisas da Amazônia (INPA)	INPA		Instituto Nacional de Pesquisas da Amazônia - INPA / Invertebrate Collection		BR:INPA:HYM:000065	Fernandes, I.O. | Souza, J.L.P.		female	adult	non-reprodutcive	alcohol	in collection / wet vial	Animalia	Arthropoda	Insecta	Hymenoptera	Formicidae	Cephalotes		Cephalotes Latreille, 1802	Latreille, 1802	Genus	Ant	Fernandes, I.O. | Souza, J.L.P.	1	Individual
PreservedSpecimen	IlhaPedras:km3:2011:1	2017-09-13	Invertebrate Collection of INPA / Environmental monitoring of ants (Hymenoptera: Formicidae) in the influence areas of Santo Antônio Hydroelectric Power-Plant in Rondônia, Brazil		en	Instituto Nacional de Pesquisas da Amazônia (INPA)	INPA		Instituto Nacional de Pesquisas da Amazônia - INPA / Invertebrate Collection		BR:INPA:HYM:000066	Fernandes, I.O. | Souza, J.L.P.		female	adult	non-reprodutcive	alcohol	in collection / wet vial	Animalia	Arthropoda	Insecta	Hymenoptera	Formicidae	Crematogaster	flavosensitiva	Crematogaster flavosensitiva Longino, 2003	Longino, 2003	Species	Ant	Fernandes, I.O. | Souza, J.L.P.	1	Individual
PreservedSpecimen	Morrinhos:Km3:2011:1	2017-09-13	Invertebrate Collection of INPA / Environmental monitoring of ants (Hymenoptera: Formicidae) in the influence areas of Santo Antônio Hydroelectric Power-Plant in Rondônia, Brazil		en	Instituto Nacional de Pesquisas da Amazônia (INPA)	INPA		Instituto Nacional de Pesquisas da Amazônia - INPA / Invertebrate Collection		BR:INPA:HYM:000067	Fernandes, I.O. | Souza, J.L.P.		female	adult	non-reprodutcive	alcohol	in collection / wet vial	Animalia	Arthropoda	Insecta	Hymenoptera	Formicidae	Crematogaster	flavosensitiva	Crematogaster flavosensitiva Longino, 2003	Longino, 2003	Species	Ant	Fernandes, I.O. | Souza, J.L.P.	1	Individual
PreservedSpecimen	IlhaBúfalos:km4:2011:1	2017-09-13	Invertebrate Collection of INPA / Environmental monitoring of ants (Hymenoptera: Formicidae) in the influence areas of Santo Antônio Hydroelectric Power-Plant in Rondônia, Brazil		en	Instituto Nacional de Pesquisas da Amazônia (INPA)	INPA		Instituto Nacional de Pesquisas da Amazônia - INPA / Invertebrate Collection		BR:INPA:HYM:000068	Fernandes, I.O. | Souza, J.L.P.		female	adult	non-reprodutcive	alcohol	in collection / wet vial	Animalia	Arthropoda	Insecta	Hymenoptera	Formicidae	Crematogaster	flavosensitiva	Crematogaster flavosensitiva Longino, 2003	Longino, 2003	Species	Ant	Fernandes, I.O. | Souza, J.L.P.	1	Individual
PreservedSpecimen	IlhaBúfalos:km0.5:2011:1	2017-09-13	Invertebrate Collection of INPA / Environmental monitoring of ants (Hymenoptera: Formicidae) in the influence areas of Santo Antônio Hydroelectric Power-Plant in Rondônia, Brazil		en	Instituto Nacional de Pesquisas da Amazônia (INPA)	INPA		Instituto Nacional de Pesquisas da Amazônia - INPA / Invertebrate Collection		BR:INPA:HYM:000069	Fernandes, I.O. | Souza, J.L.P.		female	adult	non-reprodutcive	alcohol	in collection / wet vial	Animalia	Arthropoda	Insecta	Hymenoptera	Formicidae	Crematogaster	flavosensitiva	Crematogaster flavosensitiva Longino, 2003	Longino, 2003	Species	Ant	Fernandes, I.O. | Souza, J.L.P.	1	Individual
PreservedSpecimen	IlhaPedras:km2:2011:1	2017-09-13	Invertebrate Collection of INPA / Environmental monitoring of ants (Hymenoptera: Formicidae) in the influence areas of Santo Antônio Hydroelectric Power-Plant in Rondônia, Brazil		en	Instituto Nacional de Pesquisas da Amazônia (INPA)	INPA		Instituto Nacional de Pesquisas da Amazônia - INPA / Invertebrate Collection		BR:INPA:HYM:000070	Fernandes, I.O. | Souza, J.L.P.		female	adult	non-reprodutcive	alcohol	in collection / wet vial	Animalia	Arthropoda	Insecta	Hymenoptera	Formicidae	Crematogaster	limata	Crematogaster limata Smith, 1858	Smith, 1858	Species	Ant	Fernandes, I.O. | Souza, J.L.P.	1	Individual
PreservedSpecimen	IlhaPedras:km3:2011:1	2017-09-13	Invertebrate Collection of INPA / Environmental monitoring of ants (Hymenoptera: Formicidae) in the influence areas of Santo Antônio Hydroelectric Power-Plant in Rondônia, Brazil		en	Instituto Nacional de Pesquisas da Amazônia (INPA)	INPA		Instituto Nacional de Pesquisas da Amazônia - INPA / Invertebrate Collection		BR:INPA:HYM:000071	Fernandes, I.O. | Souza, J.L.P.		female	adult	non-reprodutcive	alcohol	in collection / wet vial	Animalia	Arthropoda	Insecta	Hymenoptera	Formicidae	Crematogaster	limata	Crematogaster limata Smith, 1858	Smith, 1858	Species	Ant	Fernandes, I.O. | Souza, J.L.P.	1	Individual
PreservedSpecimen	Jaci-ParanáMD:Km3:2011:1	2017-09-13	Invertebrate Collection of INPA / Environmental monitoring of ants (Hymenoptera: Formicidae) in the influence areas of Santo Antônio Hydroelectric Power-Plant in Rondônia, Brazil		en	Instituto Nacional de Pesquisas da Amazônia (INPA)	INPA		Instituto Nacional de Pesquisas da Amazônia - INPA / Invertebrate Collection		BR:INPA:HYM:000072	Fernandes, I.O. | Souza, J.L.P.		female	adult	non-reprodutcive	alcohol	in collection / wet vial	Animalia	Arthropoda	Insecta	Hymenoptera	Formicidae	Crematogaster	limata	Crematogaster limata Smith, 1858	Smith, 1858	Species	Ant	Fernandes, I.O. | Souza, J.L.P.	1	Individual
PreservedSpecimen	Morrinhos:Km1:2011:1	2017-09-13	Invertebrate Collection of INPA / Environmental monitoring of ants (Hymenoptera: Formicidae) in the influence areas of Santo Antônio Hydroelectric Power-Plant in Rondônia, Brazil		en	Instituto Nacional de Pesquisas da Amazônia (INPA)	INPA		Instituto Nacional de Pesquisas da Amazônia - INPA / Invertebrate Collection		BR:INPA:HYM:000073	Fernandes, I.O. | Souza, J.L.P.		female	adult	non-reprodutcive	alcohol	in collection / wet vial	Animalia	Arthropoda	Insecta	Hymenoptera	Formicidae	Crematogaster	limata	Crematogaster limata Smith, 1858	Smith, 1858	Species	Ant	Fernandes, I.O. | Souza, J.L.P.	1	Individual
PreservedSpecimen	IlhaPedras:km2:2011:1	2017-09-13	Invertebrate Collection of INPA / Environmental monitoring of ants (Hymenoptera: Formicidae) in the influence areas of Santo Antônio Hydroelectric Power-Plant in Rondônia, Brazil		en	Instituto Nacional de Pesquisas da Amazônia (INPA)	INPA		Instituto Nacional de Pesquisas da Amazônia - INPA / Invertebrate Collection		BR:INPA:HYM:000074	Fernandes, I.O. | Souza, J.L.P.		female	adult	non-reprodutcive	alcohol	in collection / wet vial	Animalia	Arthropoda	Insecta	Hymenoptera	Formicidae	Crematogaster	limata	Crematogaster limata Smith, 1858	Smith, 1858	Species	Ant	Fernandes, I.O. | Souza, J.L.P.	1	Individual
PreservedSpecimen	IlhaPedras:km4:2011:1	2017-09-13	Invertebrate Collection of INPA / Environmental monitoring of ants (Hymenoptera: Formicidae) in the influence areas of Santo Antônio Hydroelectric Power-Plant in Rondônia, Brazil		en	Instituto Nacional de Pesquisas da Amazônia (INPA)	INPA		Instituto Nacional de Pesquisas da Amazônia - INPA / Invertebrate Collection		BR:INPA:HYM:000075	Fernandes, I.O. | Souza, J.L.P.		female	adult	non-reprodutcive	alcohol	in collection / wet vial	Animalia	Arthropoda	Insecta	Hymenoptera	Formicidae	Crematogaster	limata	Crematogaster limata Smith, 1858	Smith, 1858	Species	Ant	Fernandes, I.O. | Souza, J.L.P.	1	Individual
PreservedSpecimen	Jaci-ParanáMD:Km0.5:2011:1	2017-09-13	Invertebrate Collection of INPA / Environmental monitoring of ants (Hymenoptera: Formicidae) in the influence areas of Santo Antônio Hydroelectric Power-Plant in Rondônia, Brazil		en	Instituto Nacional de Pesquisas da Amazônia (INPA)	INPA		Instituto Nacional de Pesquisas da Amazônia - INPA / Invertebrate Collection		BR:INPA:HYM:000076	Fernandes, I.O. | Souza, J.L.P.		female	adult	non-reprodutcive	alcohol	in collection / wet vial	Animalia	Arthropoda	Insecta	Hymenoptera	Formicidae	Crematogaster	limata	Crematogaster limata Smith, 1858	Smith, 1858	Species	Ant	Fernandes, I.O. | Souza, J.L.P.	1	Individual
PreservedSpecimen	IlhaPedras:km1:2011:1	2017-09-13	Invertebrate Collection of INPA / Environmental monitoring of ants (Hymenoptera: Formicidae) in the influence areas of Santo Antônio Hydroelectric Power-Plant in Rondônia, Brazil		en	Instituto Nacional de Pesquisas da Amazônia (INPA)	INPA		Instituto Nacional de Pesquisas da Amazônia - INPA / Invertebrate Collection		BR:INPA:HYM:000077	Fernandes, I.O. | Souza, J.L.P.		female	adult	non-reprodutcive	alcohol	in collection / wet vial	Animalia	Arthropoda	Insecta	Hymenoptera	Formicidae	Crematogaster	limata	Crematogaster limata Smith, 1858	Smith, 1858	Species	Ant	Fernandes, I.O. | Souza, J.L.P.	1	Individual
PreservedSpecimen	IlhaPedras:km2:2011:1	2017-09-13	Invertebrate Collection of INPA / Environmental monitoring of ants (Hymenoptera: Formicidae) in the influence areas of Santo Antônio Hydroelectric Power-Plant in Rondônia, Brazil		en	Instituto Nacional de Pesquisas da Amazônia (INPA)	INPA		Instituto Nacional de Pesquisas da Amazônia - INPA / Invertebrate Collection		BR:INPA:HYM:000078	Fernandes, I.O. | Souza, J.L.P.		female	adult	non-reprodutcive	alcohol	in collection / wet vial	Animalia	Arthropoda	Insecta	Hymenoptera	Formicidae	Crematogaster	limata	Crematogaster limata Smith, 1858	Smith, 1858	Species	Ant	Fernandes, I.O. | Souza, J.L.P.	1	Individual
PreservedSpecimen	IlhaPedras:km4:2011:1	2017-09-13	Invertebrate Collection of INPA / Environmental monitoring of ants (Hymenoptera: Formicidae) in the influence areas of Santo Antônio Hydroelectric Power-Plant in Rondônia, Brazil		en	Instituto Nacional de Pesquisas da Amazônia (INPA)	INPA		Instituto Nacional de Pesquisas da Amazônia - INPA / Invertebrate Collection		BR:INPA:HYM:000079	Fernandes, I.O. | Souza, J.L.P.		female	adult	non-reprodutcive	alcohol	in collection / wet vial	Animalia	Arthropoda	Insecta	Hymenoptera	Formicidae	Crematogaster	limata	Crematogaster limata Smith, 1858	Smith, 1858	Species	Ant	Fernandes, I.O. | Souza, J.L.P.	1	Individual
PreservedSpecimen	IlhaBúfalos:km0.5:2011:1	2017-09-13	Invertebrate Collection of INPA / Environmental monitoring of ants (Hymenoptera: Formicidae) in the influence areas of Santo Antônio Hydroelectric Power-Plant in Rondônia, Brazil		en	Instituto Nacional de Pesquisas da Amazônia (INPA)	INPA		Instituto Nacional de Pesquisas da Amazônia - INPA / Invertebrate Collection		BR:INPA:HYM:000080	Fernandes, I.O. | Souza, J.L.P.		female	adult	non-reprodutcive	alcohol	in collection / wet vial	Animalia	Arthropoda	Insecta	Hymenoptera	Formicidae	Crematogaster	limata	Crematogaster limata Smith, 1858	Smith, 1858	Species	Ant	Fernandes, I.O. | Souza, J.L.P.	1	Individual
PreservedSpecimen	Jaci-ParanáMD:Km2:2011:1	2017-09-13	Invertebrate Collection of INPA / Environmental monitoring of ants (Hymenoptera: Formicidae) in the influence areas of Santo Antônio Hydroelectric Power-Plant in Rondônia, Brazil		en	Instituto Nacional de Pesquisas da Amazônia (INPA)	INPA		Instituto Nacional de Pesquisas da Amazônia - INPA / Invertebrate Collection		BR:INPA:HYM:000081	Fernandes, I.O. | Souza, J.L.P.		female	adult	non-reprodutcive	alcohol	in collection / wet vial	Animalia	Arthropoda	Insecta	Hymenoptera	Formicidae	Crematogaster	limata	Crematogaster limata Smith, 1858	Smith, 1858	Species	Ant	Fernandes, I.O. | Souza, J.L.P.	1	Individual
PreservedSpecimen	IlhaPedras:km4:2011:1	2017-09-13	Invertebrate Collection of INPA / Environmental monitoring of ants (Hymenoptera: Formicidae) in the influence areas of Santo Antônio Hydroelectric Power-Plant in Rondônia, Brazil		en	Instituto Nacional de Pesquisas da Amazônia (INPA)	INPA		Instituto Nacional de Pesquisas da Amazônia - INPA / Invertebrate Collection		BR:INPA:HYM:000082	Fernandes, I.O. | Souza, J.L.P.		female	adult	non-reprodutcive	alcohol	in collection / wet vial	Animalia	Arthropoda	Insecta	Hymenoptera	Formicidae	Crematogaster	limata	Crematogaster limata Smith, 1858	Smith, 1858	Species	Ant	Fernandes, I.O. | Souza, J.L.P.	1	Individual
PreservedSpecimen	Jaci-ParanáMD:Km3:2011:1	2017-09-13	Invertebrate Collection of INPA / Environmental monitoring of ants (Hymenoptera: Formicidae) in the influence areas of Santo Antônio Hydroelectric Power-Plant in Rondônia, Brazil		en	Instituto Nacional de Pesquisas da Amazônia (INPA)	INPA		Instituto Nacional de Pesquisas da Amazônia - INPA / Invertebrate Collection		BR:INPA:HYM:000083	Fernandes, I.O. | Souza, J.L.P.		female	adult	non-reprodutcive	alcohol	in collection / wet vial	Animalia	Arthropoda	Insecta	Hymenoptera	Formicidae	Crematogaster	limata	Crematogaster limata Smith, 1858	Smith, 1858	Species	Ant	Fernandes, I.O. | Souza, J.L.P.	1	Individual
PreservedSpecimen	IlhaPedras:km4:2011:1	2017-09-13	Invertebrate Collection of INPA / Environmental monitoring of ants (Hymenoptera: Formicidae) in the influence areas of Santo Antônio Hydroelectric Power-Plant in Rondônia, Brazil		en	Instituto Nacional de Pesquisas da Amazônia (INPA)	INPA		Instituto Nacional de Pesquisas da Amazônia - INPA / Invertebrate Collection		BR:INPA:HYM:000084	Fernandes, I.O. | Souza, J.L.P.		female	adult	non-reprodutcive	alcohol	in collection / wet vial	Animalia	Arthropoda	Insecta	Hymenoptera	Formicidae	Crematogaster	limata	Crematogaster limata Smith, 1858	Smith, 1858	Species	Ant	Fernandes, I.O. | Souza, J.L.P.	1	Individual
PreservedSpecimen	Morrinhos:Km0:2011:1	2017-09-13	Invertebrate Collection of INPA / Environmental monitoring of ants (Hymenoptera: Formicidae) in the influence areas of Santo Antônio Hydroelectric Power-Plant in Rondônia, Brazil		en	Instituto Nacional de Pesquisas da Amazônia (INPA)	INPA		Instituto Nacional de Pesquisas da Amazônia - INPA / Invertebrate Collection		BR:INPA:HYM:000085	Fernandes, I.O. | Souza, J.L.P.		female	adult	non-reprodutcive	alcohol	in collection / wet vial	Animalia	Arthropoda	Insecta	Hymenoptera	Formicidae	Crematogaster	tenuicula	Crematogaster tenuicula Forel, 1904	Forel, 1904	Species	Ant	Fernandes, I.O. | Souza, J.L.P.	1	Individual
PreservedSpecimen	IlhaBúfalos:km0:2011:1	2017-09-13	Invertebrate Collection of INPA / Environmental monitoring of ants (Hymenoptera: Formicidae) in the influence areas of Santo Antônio Hydroelectric Power-Plant in Rondônia, Brazil		en	Instituto Nacional de Pesquisas da Amazônia (INPA)	INPA		Instituto Nacional de Pesquisas da Amazônia - INPA / Invertebrate Collection		BR:INPA:HYM:000086	Fernandes, I.O. | Souza, J.L.P.		female	adult	non-reprodutcive	alcohol	in collection / wet vial	Animalia	Arthropoda	Insecta	Hymenoptera	Formicidae	Crematogaster		Crematogaster Lund, 1831	Lund, 1831	Genus	Ant	Fernandes, I.O. | Souza, J.L.P.	1	Individual
PreservedSpecimen	IlhaBúfalos:km0.5:2011:1	2017-09-13	Invertebrate Collection of INPA / Environmental monitoring of ants (Hymenoptera: Formicidae) in the influence areas of Santo Antônio Hydroelectric Power-Plant in Rondônia, Brazil		en	Instituto Nacional de Pesquisas da Amazônia (INPA)	INPA		Instituto Nacional de Pesquisas da Amazônia - INPA / Invertebrate Collection		BR:INPA:HYM:000087	Fernandes, I.O. | Souza, J.L.P.		female	adult	non-reprodutcive	alcohol	in collection / wet vial	Animalia	Arthropoda	Insecta	Hymenoptera	Formicidae	Crematogaster		Crematogaster Lund, 1831	Lund, 1831	Genus	Ant	Fernandes, I.O. | Souza, J.L.P.	1	Individual
PreservedSpecimen	IlhaBúfalos:km0.5:2011:1	2017-09-13	Invertebrate Collection of INPA / Environmental monitoring of ants (Hymenoptera: Formicidae) in the influence areas of Santo Antônio Hydroelectric Power-Plant in Rondônia, Brazil		en	Instituto Nacional de Pesquisas da Amazônia (INPA)	INPA		Instituto Nacional de Pesquisas da Amazônia - INPA / Invertebrate Collection		BR:INPA:HYM:000088	Fernandes, I.O. | Souza, J.L.P.		female	adult	non-reprodutcive	alcohol	in collection / wet vial	Animalia	Arthropoda	Insecta	Hymenoptera	Formicidae	Crematogaster		Crematogaster Lund, 1831	Lund, 1831	Genus	Ant	Fernandes, I.O. | Souza, J.L.P.	1	Individual
PreservedSpecimen	IlhaBúfalos:km0.5:2011:1	2017-09-13	Invertebrate Collection of INPA / Environmental monitoring of ants (Hymenoptera: Formicidae) in the influence areas of Santo Antônio Hydroelectric Power-Plant in Rondônia, Brazil		en	Instituto Nacional de Pesquisas da Amazônia (INPA)	INPA		Instituto Nacional de Pesquisas da Amazônia - INPA / Invertebrate Collection		BR:INPA:HYM:000089	Fernandes, I.O. | Souza, J.L.P.		female	adult	non-reprodutcive	alcohol	in collection / wet vial	Animalia	Arthropoda	Insecta	Hymenoptera	Formicidae	Crematogaster		Crematogaster Lund, 1831	Lund, 1831	Genus	Ant	Fernandes, I.O. | Souza, J.L.P.	1	Individual
PreservedSpecimen	IlhaBúfalos:km0:2011:1	2017-09-13	Invertebrate Collection of INPA / Environmental monitoring of ants (Hymenoptera: Formicidae) in the influence areas of Santo Antônio Hydroelectric Power-Plant in Rondônia, Brazil		en	Instituto Nacional de Pesquisas da Amazônia (INPA)	INPA		Instituto Nacional de Pesquisas da Amazônia - INPA / Invertebrate Collection		BR:INPA:HYM:000090	Fernandes, I.O. | Souza, J.L.P.		female	adult	non-reprodutcive	alcohol	in collection / wet vial	Animalia	Arthropoda	Insecta	Hymenoptera	Formicidae	Crematogaster		Crematogaster Lund, 1831	Lund, 1831	Genus	Ant	Fernandes, I.O. | Souza, J.L.P.	1	Individual
PreservedSpecimen	Jaci-ParanáMD:Km0.5:2011:1	2017-09-13	Invertebrate Collection of INPA / Environmental monitoring of ants (Hymenoptera: Formicidae) in the influence areas of Santo Antônio Hydroelectric Power-Plant in Rondônia, Brazil		en	Instituto Nacional de Pesquisas da Amazônia (INPA)	INPA		Instituto Nacional de Pesquisas da Amazônia - INPA / Invertebrate Collection		BR:INPA:HYM:000091	Fernandes, I.O. | Souza, J.L.P.		female	adult	non-reprodutcive	alcohol	in collection / wet vial	Animalia	Arthropoda	Insecta	Hymenoptera	Formicidae	Crematogaster	stollii	Crematogaster stollii Forel, 1885	Forel, 1885	Species	Ant	Fernandes, I.O. | Souza, J.L.P.	1	Individual
PreservedSpecimen	IlhaPedras:km3:2011:1	2017-09-13	Invertebrate Collection of INPA / Environmental monitoring of ants (Hymenoptera: Formicidae) in the influence areas of Santo Antônio Hydroelectric Power-Plant in Rondônia, Brazil		en	Instituto Nacional de Pesquisas da Amazônia (INPA)	INPA		Instituto Nacional de Pesquisas da Amazônia - INPA / Invertebrate Collection		BR:INPA:HYM:000092	Fernandes, I.O. | Souza, J.L.P.		female	adult	non-reprodutcive	alcohol	in collection / wet vial	Animalia	Arthropoda	Insecta	Hymenoptera	Formicidae	Crematogaster	stollii	Crematogaster stollii Forel, 1885	Forel, 1885	Species	Ant	Fernandes, I.O. | Souza, J.L.P.	1	Individual
PreservedSpecimen	IlhaBúfalos:km2:2011:1	2017-09-13	Invertebrate Collection of INPA / Environmental monitoring of ants (Hymenoptera: Formicidae) in the influence areas of Santo Antônio Hydroelectric Power-Plant in Rondônia, Brazil		en	Instituto Nacional de Pesquisas da Amazônia (INPA)	INPA		Instituto Nacional de Pesquisas da Amazônia - INPA / Invertebrate Collection		BR:INPA:HYM:000093	Fernandes, I.O. | Souza, J.L.P.		female	adult	non-reprodutcive	alcohol	in collection / wet vial	Animalia	Arthropoda	Insecta	Hymenoptera	Formicidae	Crematogaster	tenuicula	Crematogaster tenuicula Forel, 1904	Forel, 1904	Species	Ant	Fernandes, I.O. | Souza, J.L.P.	1	Individual
PreservedSpecimen	IlhaBúfalos:km2:2011:1	2017-09-13	Invertebrate Collection of INPA / Environmental monitoring of ants (Hymenoptera: Formicidae) in the influence areas of Santo Antônio Hydroelectric Power-Plant in Rondônia, Brazil		en	Instituto Nacional de Pesquisas da Amazônia (INPA)	INPA		Instituto Nacional de Pesquisas da Amazônia - INPA / Invertebrate Collection		BR:INPA:HYM:000094	Fernandes, I.O. | Souza, J.L.P.		female	adult	non-reprodutcive	alcohol	in collection / wet vial	Animalia	Arthropoda	Insecta	Hymenoptera	Formicidae	Crematogaster	tenuicula	Crematogaster tenuicula Forel, 1904	Forel, 1904	Species	Ant	Fernandes, I.O. | Souza, J.L.P.	1	Individual
PreservedSpecimen	IlhaBúfalos:km4:2011:1	2017-09-13	Invertebrate Collection of INPA / Environmental monitoring of ants (Hymenoptera: Formicidae) in the influence areas of Santo Antônio Hydroelectric Power-Plant in Rondônia, Brazil		en	Instituto Nacional de Pesquisas da Amazônia (INPA)	INPA		Instituto Nacional de Pesquisas da Amazônia - INPA / Invertebrate Collection		BR:INPA:HYM:000095	Fernandes, I.O. | Souza, J.L.P.		female	adult	non-reprodutcive	alcohol	in collection / wet vial	Animalia	Arthropoda	Insecta	Hymenoptera	Formicidae	Crematogaster	tenuicula	Crematogaster tenuicula Forel, 1904	Forel, 1904	Species	Ant	Fernandes, I.O. | Souza, J.L.P.	1	Individual
PreservedSpecimen	Jaci-ParanáMD:Km0:2011:1	2017-09-13	Invertebrate Collection of INPA / Environmental monitoring of ants (Hymenoptera: Formicidae) in the influence areas of Santo Antônio Hydroelectric Power-Plant in Rondônia, Brazil		en	Instituto Nacional de Pesquisas da Amazônia (INPA)	INPA		Instituto Nacional de Pesquisas da Amazônia - INPA / Invertebrate Collection		BR:INPA:HYM:000096	Fernandes, I.O. | Souza, J.L.P.		female	adult	non-reprodutcive	alcohol	in collection / wet vial	Animalia	Arthropoda	Insecta	Hymenoptera	Formicidae	Crematogaster	tenuicula	Crematogaster tenuicula Forel, 1904	Forel, 1904	Species	Ant	Fernandes, I.O. | Souza, J.L.P.	1	Individual
PreservedSpecimen	IlhaPedras:km0.5:2011:1	2017-09-13	Invertebrate Collection of INPA / Environmental monitoring of ants (Hymenoptera: Formicidae) in the influence areas of Santo Antônio Hydroelectric Power-Plant in Rondônia, Brazil		en	Instituto Nacional de Pesquisas da Amazônia (INPA)	INPA		Instituto Nacional de Pesquisas da Amazônia - INPA / Invertebrate Collection		BR:INPA:HYM:000097	Fernandes, I.O. | Souza, J.L.P.		female	adult	non-reprodutcive	alcohol	in collection / wet vial	Animalia	Arthropoda	Insecta	Hymenoptera	Formicidae	Crematogaster	tenuicula	Crematogaster tenuicula Forel, 1904	Forel, 1904	Species	Ant	Fernandes, I.O. | Souza, J.L.P.	1	Individual
PreservedSpecimen	Jaci-ParanáMD:Km0.5:2011:1	2017-09-13	Invertebrate Collection of INPA / Environmental monitoring of ants (Hymenoptera: Formicidae) in the influence areas of Santo Antônio Hydroelectric Power-Plant in Rondônia, Brazil		en	Instituto Nacional de Pesquisas da Amazônia (INPA)	INPA		Instituto Nacional de Pesquisas da Amazônia - INPA / Invertebrate Collection		BR:INPA:HYM:000098	Fernandes, I.O. | Souza, J.L.P.		female	adult	non-reprodutcive	alcohol	in collection / wet vial	Animalia	Arthropoda	Insecta	Hymenoptera	Formicidae	Crematogaster	tenuicula	Crematogaster tenuicula Forel, 1904	Forel, 1904	Species	Ant	Fernandes, I.O. | Souza, J.L.P.	1	Individual
PreservedSpecimen	Morrinhos:Km0.5:2011:1	2017-09-13	Invertebrate Collection of INPA / Environmental monitoring of ants (Hymenoptera: Formicidae) in the influence areas of Santo Antônio Hydroelectric Power-Plant in Rondônia, Brazil		en	Instituto Nacional de Pesquisas da Amazônia (INPA)	INPA		Instituto Nacional de Pesquisas da Amazônia - INPA / Invertebrate Collection		BR:INPA:HYM:000099	Fernandes, I.O. | Souza, J.L.P.		female	adult	non-reprodutcive	alcohol	in collection / wet vial	Animalia	Arthropoda	Insecta	Hymenoptera	Formicidae	Crematogaster	tenuicula	Crematogaster tenuicula Forel, 1904	Forel, 1904	Species	Ant	Fernandes, I.O. | Souza, J.L.P.	1	Individual
PreservedSpecimen	IlhaBúfalos:km1:2011:1	2017-09-13	Invertebrate Collection of INPA / Environmental monitoring of ants (Hymenoptera: Formicidae) in the influence areas of Santo Antônio Hydroelectric Power-Plant in Rondônia, Brazil		en	Instituto Nacional de Pesquisas da Amazônia (INPA)	INPA		Instituto Nacional de Pesquisas da Amazônia - INPA / Invertebrate Collection		BR:INPA:HYM:000100	Fernandes, I.O. | Souza, J.L.P.		female	adult	non-reprodutcive	alcohol	in collection / wet vial	Animalia	Arthropoda	Insecta	Hymenoptera	Formicidae	Crematogaster	tenuicula	Crematogaster tenuicula Forel, 1904	Forel, 1904	Species	Ant	Fernandes, I.O. | Souza, J.L.P.	1	Individual
PreservedSpecimen	Morrinhos:Km2:2011:1	2017-09-13	Invertebrate Collection of INPA / Environmental monitoring of ants (Hymenoptera: Formicidae) in the influence areas of Santo Antônio Hydroelectric Power-Plant in Rondônia, Brazil		en	Instituto Nacional de Pesquisas da Amazônia (INPA)	INPA		Instituto Nacional de Pesquisas da Amazônia - INPA / Invertebrate Collection		BR:INPA:HYM:000101	Fernandes, I.O. | Souza, J.L.P.		female	adult	non-reprodutcive	alcohol	in collection / wet vial	Animalia	Arthropoda	Insecta	Hymenoptera	Formicidae	Crematogaster	tenuicula	Crematogaster tenuicula Forel, 1904	Forel, 1904	Species	Ant	Fernandes, I.O. | Souza, J.L.P.	1	Individual
PreservedSpecimen	IlhaPedras:km0:2011:1	2017-09-13	Invertebrate Collection of INPA / Environmental monitoring of ants (Hymenoptera: Formicidae) in the influence areas of Santo Antônio Hydroelectric Power-Plant in Rondônia, Brazil		en	Instituto Nacional de Pesquisas da Amazônia (INPA)	INPA		Instituto Nacional de Pesquisas da Amazônia - INPA / Invertebrate Collection		BR:INPA:HYM:000102	Fernandes, I.O. | Souza, J.L.P.		female	adult	non-reprodutcive	alcohol	in collection / wet vial	Animalia	Arthropoda	Insecta	Hymenoptera	Formicidae	Crematogaster	tenuicula	Crematogaster tenuicula Forel, 1904	Forel, 1904	Species	Ant	Fernandes, I.O. | Souza, J.L.P.	1	Individual
PreservedSpecimen	IlhaPedras:km0.5:2011:1	2017-09-13	Invertebrate Collection of INPA / Environmental monitoring of ants (Hymenoptera: Formicidae) in the influence areas of Santo Antônio Hydroelectric Power-Plant in Rondônia, Brazil		en	Instituto Nacional de Pesquisas da Amazônia (INPA)	INPA		Instituto Nacional de Pesquisas da Amazônia - INPA / Invertebrate Collection		BR:INPA:HYM:000103	Fernandes, I.O. | Souza, J.L.P.		female	adult	non-reprodutcive	alcohol	in collection / wet vial	Animalia	Arthropoda	Insecta	Hymenoptera	Formicidae	Crematogaster	tenuicula	Crematogaster tenuicula Forel, 1904	Forel, 1904	Species	Ant	Fernandes, I.O. | Souza, J.L.P.	1	Individual
PreservedSpecimen	IlhaBúfalos:km1:2011:1	2017-09-13	Invertebrate Collection of INPA / Environmental monitoring of ants (Hymenoptera: Formicidae) in the influence areas of Santo Antônio Hydroelectric Power-Plant in Rondônia, Brazil		en	Instituto Nacional de Pesquisas da Amazônia (INPA)	INPA		Instituto Nacional de Pesquisas da Amazônia - INPA / Invertebrate Collection		BR:INPA:HYM:000104	Fernandes, I.O. | Souza, J.L.P.		female	adult	non-reprodutcive	alcohol	in collection / wet vial	Animalia	Arthropoda	Insecta	Hymenoptera	Formicidae	Crematogaster	tenuicula	Crematogaster tenuicula Forel, 1904	Forel, 1904	Species	Ant	Fernandes, I.O. | Souza, J.L.P.	1	Individual
PreservedSpecimen	IlhaBúfalos:km2:2011:1	2017-09-13	Invertebrate Collection of INPA / Environmental monitoring of ants (Hymenoptera: Formicidae) in the influence areas of Santo Antônio Hydroelectric Power-Plant in Rondônia, Brazil		en	Instituto Nacional de Pesquisas da Amazônia (INPA)	INPA		Instituto Nacional de Pesquisas da Amazônia - INPA / Invertebrate Collection		BR:INPA:HYM:000105	Fernandes, I.O. | Souza, J.L.P.		female	adult	non-reprodutcive	alcohol	in collection / wet vial	Animalia	Arthropoda	Insecta	Hymenoptera	Formicidae	Crematogaster	tenuicula	Crematogaster tenuicula Forel, 1904	Forel, 1904	Species	Ant	Fernandes, I.O. | Souza, J.L.P.	1	Individual
PreservedSpecimen	Morrinhos:Km0:2011:1	2017-09-13	Invertebrate Collection of INPA / Environmental monitoring of ants (Hymenoptera: Formicidae) in the influence areas of Santo Antônio Hydroelectric Power-Plant in Rondônia, Brazil		en	Instituto Nacional de Pesquisas da Amazônia (INPA)	INPA		Instituto Nacional de Pesquisas da Amazônia - INPA / Invertebrate Collection		BR:INPA:HYM:000106	Fernandes, I.O. | Souza, J.L.P.		female	adult	non-reprodutcive	alcohol	in collection / wet vial	Animalia	Arthropoda	Insecta	Hymenoptera	Formicidae	Crematogaster	tenuicula	Crematogaster tenuicula Forel, 1904	Forel, 1904	Species	Ant	Fernandes, I.O. | Souza, J.L.P.	1	Individual
PreservedSpecimen	Jaci-ParanáMD:Km0.5:2011:1	2017-09-13	Invertebrate Collection of INPA / Environmental monitoring of ants (Hymenoptera: Formicidae) in the influence areas of Santo Antônio Hydroelectric Power-Plant in Rondônia, Brazil		en	Instituto Nacional de Pesquisas da Amazônia (INPA)	INPA		Instituto Nacional de Pesquisas da Amazônia - INPA / Invertebrate Collection		BR:INPA:HYM:000107	Fernandes, I.O. | Souza, J.L.P.		female	adult	non-reprodutcive	alcohol	in collection / wet vial	Animalia	Arthropoda	Insecta	Hymenoptera	Formicidae	Crematogaster	tenuicula	Crematogaster tenuicula Forel, 1904	Forel, 1904	Species	Ant	Fernandes, I.O. | Souza, J.L.P.	1	Individual
PreservedSpecimen	Morrinhos:Km0.5:2011:1	2017-09-13	Invertebrate Collection of INPA / Environmental monitoring of ants (Hymenoptera: Formicidae) in the influence areas of Santo Antônio Hydroelectric Power-Plant in Rondônia, Brazil		en	Instituto Nacional de Pesquisas da Amazônia (INPA)	INPA		Instituto Nacional de Pesquisas da Amazônia - INPA / Invertebrate Collection		BR:INPA:HYM:000108	Fernandes, I.O. | Souza, J.L.P.		female	adult	non-reprodutcive	alcohol	in collection / wet vial	Animalia	Arthropoda	Insecta	Hymenoptera	Formicidae	Crematogaster	tenuicula	Crematogaster tenuicula Forel, 1904	Forel, 1904	Species	Ant	Fernandes, I.O. | Souza, J.L.P.	1	Individual
PreservedSpecimen	IlhaBúfalos:km1:2011:1	2017-09-13	Invertebrate Collection of INPA / Environmental monitoring of ants (Hymenoptera: Formicidae) in the influence areas of Santo Antônio Hydroelectric Power-Plant in Rondônia, Brazil		en	Instituto Nacional de Pesquisas da Amazônia (INPA)	INPA		Instituto Nacional de Pesquisas da Amazônia - INPA / Invertebrate Collection		BR:INPA:HYM:000109	Fernandes, I.O. | Souza, J.L.P.		female	adult	non-reprodutcive	alcohol	in collection / wet vial	Animalia	Arthropoda	Insecta	Hymenoptera	Formicidae	Crematogaster	tenuicula	Crematogaster tenuicula Forel, 1904	Forel, 1904	Species	Ant	Fernandes, I.O. | Souza, J.L.P.	1	Individual
PreservedSpecimen	Jaci-ParanáMD:Km1:2011:1	2017-09-13	Invertebrate Collection of INPA / Environmental monitoring of ants (Hymenoptera: Formicidae) in the influence areas of Santo Antônio Hydroelectric Power-Plant in Rondônia, Brazil		en	Instituto Nacional de Pesquisas da Amazônia (INPA)	INPA		Instituto Nacional de Pesquisas da Amazônia - INPA / Invertebrate Collection		BR:INPA:HYM:000110	Fernandes, I.O. | Souza, J.L.P.		female	adult	non-reprodutcive	alcohol	in collection / wet vial	Animalia	Arthropoda	Insecta	Hymenoptera	Formicidae	Crematogaster	tenuicula	Crematogaster tenuicula Forel, 1904	Forel, 1904	Species	Ant	Fernandes, I.O. | Souza, J.L.P.	1	Individual
PreservedSpecimen	Morrinhos:Km2:2011:1	2017-09-13	Invertebrate Collection of INPA / Environmental monitoring of ants (Hymenoptera: Formicidae) in the influence areas of Santo Antônio Hydroelectric Power-Plant in Rondônia, Brazil		en	Instituto Nacional de Pesquisas da Amazônia (INPA)	INPA		Instituto Nacional de Pesquisas da Amazônia - INPA / Invertebrate Collection		BR:INPA:HYM:000111	Fernandes, I.O. | Souza, J.L.P.		female	adult	non-reprodutcive	alcohol	in collection / wet vial	Animalia	Arthropoda	Insecta	Hymenoptera	Formicidae	Crematogaster	tenuicula	Crematogaster tenuicula Forel, 1904	Forel, 1904	Species	Ant	Fernandes, I.O. | Souza, J.L.P.	1	Individual
PreservedSpecimen	IlhaPedras:km3:2011:1	2017-09-13	Invertebrate Collection of INPA / Environmental monitoring of ants (Hymenoptera: Formicidae) in the influence areas of Santo Antônio Hydroelectric Power-Plant in Rondônia, Brazil		en	Instituto Nacional de Pesquisas da Amazônia (INPA)	INPA		Instituto Nacional de Pesquisas da Amazônia - INPA / Invertebrate Collection		BR:INPA:HYM:000112	Fernandes, I.O. | Souza, J.L.P.		female	adult	non-reprodutcive	alcohol	in collection / wet vial	Animalia	Arthropoda	Insecta	Hymenoptera	Formicidae	Crematogaster	tenuicula	Crematogaster tenuicula Forel, 1904	Forel, 1904	Species	Ant	Fernandes, I.O. | Souza, J.L.P.	1	Individual
PreservedSpecimen	IlhaPedras:km0:2011:1	2017-09-13	Invertebrate Collection of INPA / Environmental monitoring of ants (Hymenoptera: Formicidae) in the influence areas of Santo Antônio Hydroelectric Power-Plant in Rondônia, Brazil		en	Instituto Nacional de Pesquisas da Amazônia (INPA)	INPA		Instituto Nacional de Pesquisas da Amazônia - INPA / Invertebrate Collection		BR:INPA:HYM:000113	Fernandes, I.O. | Souza, J.L.P.		female	adult	non-reprodutcive	alcohol	in collection / wet vial	Animalia	Arthropoda	Insecta	Hymenoptera	Formicidae	Crematogaster	tenuicula	Crematogaster tenuicula Forel, 1904	Forel, 1904	Species	Ant	Fernandes, I.O. | Souza, J.L.P.	1	Individual
PreservedSpecimen	Morrinhos:Km0:2011:1	2017-09-13	Invertebrate Collection of INPA / Environmental monitoring of ants (Hymenoptera: Formicidae) in the influence areas of Santo Antônio Hydroelectric Power-Plant in Rondônia, Brazil		en	Instituto Nacional de Pesquisas da Amazônia (INPA)	INPA		Instituto Nacional de Pesquisas da Amazônia - INPA / Invertebrate Collection		BR:INPA:HYM:000114	Fernandes, I.O. | Souza, J.L.P.		female	adult	non-reprodutcive	alcohol	in collection / wet vial	Animalia	Arthropoda	Insecta	Hymenoptera	Formicidae	Crematogaster	tenuicula	Crematogaster tenuicula Forel, 1904	Forel, 1904	Species	Ant	Fernandes, I.O. | Souza, J.L.P.	1	Individual
PreservedSpecimen	IlhaPedras:km0.5:2011:1	2017-09-13	Invertebrate Collection of INPA / Environmental monitoring of ants (Hymenoptera: Formicidae) in the influence areas of Santo Antônio Hydroelectric Power-Plant in Rondônia, Brazil		en	Instituto Nacional de Pesquisas da Amazônia (INPA)	INPA		Instituto Nacional de Pesquisas da Amazônia - INPA / Invertebrate Collection		BR:INPA:HYM:000115	Fernandes, I.O. | Souza, J.L.P.		female	adult	non-reprodutcive	alcohol	in collection / wet vial	Animalia	Arthropoda	Insecta	Hymenoptera	Formicidae	Crematogaster	tenuicula	Crematogaster tenuicula Forel, 1904	Forel, 1904	Species	Ant	Fernandes, I.O. | Souza, J.L.P.	1	Individual
PreservedSpecimen	IlhaBúfalos:km1:2011:1	2017-09-13	Invertebrate Collection of INPA / Environmental monitoring of ants (Hymenoptera: Formicidae) in the influence areas of Santo Antônio Hydroelectric Power-Plant in Rondônia, Brazil		en	Instituto Nacional de Pesquisas da Amazônia (INPA)	INPA		Instituto Nacional de Pesquisas da Amazônia - INPA / Invertebrate Collection		BR:INPA:HYM:000116	Fernandes, I.O. | Souza, J.L.P.		female	adult	non-reprodutcive	alcohol	in collection / wet vial	Animalia	Arthropoda	Insecta	Hymenoptera	Formicidae	Crematogaster	tenuicula	Crematogaster tenuicula Forel, 1904	Forel, 1904	Species	Ant	Fernandes, I.O. | Souza, J.L.P.	1	Individual
PreservedSpecimen	IlhaPedras:km2:2011:1	2017-09-13	Invertebrate Collection of INPA / Environmental monitoring of ants (Hymenoptera: Formicidae) in the influence areas of Santo Antônio Hydroelectric Power-Plant in Rondônia, Brazil		en	Instituto Nacional de Pesquisas da Amazônia (INPA)	INPA		Instituto Nacional de Pesquisas da Amazônia - INPA / Invertebrate Collection		BR:INPA:HYM:000117	Fernandes, I.O. | Souza, J.L.P.		female	adult	non-reprodutcive	alcohol	in collection / wet vial	Animalia	Arthropoda	Insecta	Hymenoptera	Formicidae	Crematogaster	tenuicula	Crematogaster tenuicula Forel, 1904	Forel, 1904	Species	Ant	Fernandes, I.O. | Souza, J.L.P.	1	Individual
PreservedSpecimen	Morrinhos:Km2:2011:1	2017-09-13	Invertebrate Collection of INPA / Environmental monitoring of ants (Hymenoptera: Formicidae) in the influence areas of Santo Antônio Hydroelectric Power-Plant in Rondônia, Brazil		en	Instituto Nacional de Pesquisas da Amazônia (INPA)	INPA		Instituto Nacional de Pesquisas da Amazônia - INPA / Invertebrate Collection		BR:INPA:HYM:000118	Fernandes, I.O. | Souza, J.L.P.		female	adult	non-reprodutcive	alcohol	in collection / wet vial	Animalia	Arthropoda	Insecta	Hymenoptera	Formicidae	Crematogaster	tenuicula	Crematogaster tenuicula Forel, 1904	Forel, 1904	Species	Ant	Fernandes, I.O. | Souza, J.L.P.	1	Individual
PreservedSpecimen	IlhaBúfalos:km4:2011:1	2017-09-13	Invertebrate Collection of INPA / Environmental monitoring of ants (Hymenoptera: Formicidae) in the influence areas of Santo Antônio Hydroelectric Power-Plant in Rondônia, Brazil		en	Instituto Nacional de Pesquisas da Amazônia (INPA)	INPA		Instituto Nacional de Pesquisas da Amazônia - INPA / Invertebrate Collection		BR:INPA:HYM:000119	Fernandes, I.O. | Souza, J.L.P.		female	adult	non-reprodutcive	alcohol	in collection / wet vial	Animalia	Arthropoda	Insecta	Hymenoptera	Formicidae	Crematogaster	tenuicula	Crematogaster tenuicula Forel, 1904	Forel, 1904	Species	Ant	Fernandes, I.O. | Souza, J.L.P.	1	Individual
PreservedSpecimen	Jaci-ParanáMD:Km4:2011:1	2017-09-13	Invertebrate Collection of INPA / Environmental monitoring of ants (Hymenoptera: Formicidae) in the influence areas of Santo Antônio Hydroelectric Power-Plant in Rondônia, Brazil		en	Instituto Nacional de Pesquisas da Amazônia (INPA)	INPA		Instituto Nacional de Pesquisas da Amazônia - INPA / Invertebrate Collection		BR:INPA:HYM:000120	Fernandes, I.O. | Souza, J.L.P.		female	adult	non-reprodutcive	alcohol	in collection / wet vial	Animalia	Arthropoda	Insecta	Hymenoptera	Formicidae	Crematogaster	tenuicula	Crematogaster tenuicula Forel, 1904	Forel, 1904	Species	Ant	Fernandes, I.O. | Souza, J.L.P.	1	Individual
PreservedSpecimen	IlhaBúfalos:km0.5:2011:1	2017-09-13	Invertebrate Collection of INPA / Environmental monitoring of ants (Hymenoptera: Formicidae) in the influence areas of Santo Antônio Hydroelectric Power-Plant in Rondônia, Brazil		en	Instituto Nacional de Pesquisas da Amazônia (INPA)	INPA		Instituto Nacional de Pesquisas da Amazônia - INPA / Invertebrate Collection		BR:INPA:HYM:000121	Fernandes, I.O. | Souza, J.L.P.		female	adult	non-reprodutcive	alcohol	in collection / wet vial	Animalia	Arthropoda	Insecta	Hymenoptera	Formicidae	Crematogaster	tenuicula	Crematogaster tenuicula Forel, 1904	Forel, 1904	Species	Ant	Fernandes, I.O. | Souza, J.L.P.	1	Individual
PreservedSpecimen	Jaci-ParanáMD:Km0.5:2011:1	2017-09-13	Invertebrate Collection of INPA / Environmental monitoring of ants (Hymenoptera: Formicidae) in the influence areas of Santo Antônio Hydroelectric Power-Plant in Rondônia, Brazil		en	Instituto Nacional de Pesquisas da Amazônia (INPA)	INPA		Instituto Nacional de Pesquisas da Amazônia - INPA / Invertebrate Collection		BR:INPA:HYM:000122	Fernandes, I.O. | Souza, J.L.P.		female	adult	non-reprodutcive	alcohol	in collection / wet vial	Animalia	Arthropoda	Insecta	Hymenoptera	Formicidae	Crematogaster	tenuicula	Crematogaster tenuicula Forel, 1904	Forel, 1904	Species	Ant	Fernandes, I.O. | Souza, J.L.P.	1	Individual
PreservedSpecimen	IlhaBúfalos:km1:2011:1	2017-09-13	Invertebrate Collection of INPA / Environmental monitoring of ants (Hymenoptera: Formicidae) in the influence areas of Santo Antônio Hydroelectric Power-Plant in Rondônia, Brazil		en	Instituto Nacional de Pesquisas da Amazônia (INPA)	INPA		Instituto Nacional de Pesquisas da Amazônia - INPA / Invertebrate Collection		BR:INPA:HYM:000123	Fernandes, I.O. | Souza, J.L.P.		female	adult	non-reprodutcive	alcohol	in collection / wet vial	Animalia	Arthropoda	Insecta	Hymenoptera	Formicidae	Crematogaster	tenuicula	Crematogaster tenuicula Forel, 1904	Forel, 1904	Species	Ant	Fernandes, I.O. | Souza, J.L.P.	1	Individual
PreservedSpecimen	IlhaBúfalos:km4:2011:1	2017-09-13	Invertebrate Collection of INPA / Environmental monitoring of ants (Hymenoptera: Formicidae) in the influence areas of Santo Antônio Hydroelectric Power-Plant in Rondônia, Brazil		en	Instituto Nacional de Pesquisas da Amazônia (INPA)	INPA		Instituto Nacional de Pesquisas da Amazônia - INPA / Invertebrate Collection		BR:INPA:HYM:000124	Fernandes, I.O. | Souza, J.L.P.		female	adult	non-reprodutcive	alcohol	in collection / wet vial	Animalia	Arthropoda	Insecta	Hymenoptera	Formicidae	Crematogaster	tenuicula	Crematogaster tenuicula Forel, 1904	Forel, 1904	Species	Ant	Fernandes, I.O. | Souza, J.L.P.	1	Individual
PreservedSpecimen	Jaci-ParanáMD:Km4:2011:1	2017-09-13	Invertebrate Collection of INPA / Environmental monitoring of ants (Hymenoptera: Formicidae) in the influence areas of Santo Antônio Hydroelectric Power-Plant in Rondônia, Brazil		en	Instituto Nacional de Pesquisas da Amazônia (INPA)	INPA		Instituto Nacional de Pesquisas da Amazônia - INPA / Invertebrate Collection		BR:INPA:HYM:000125	Fernandes, I.O. | Souza, J.L.P.		female	adult	non-reprodutcive	alcohol	in collection / wet vial	Animalia	Arthropoda	Insecta	Hymenoptera	Formicidae	Crematogaster	tenuicula	Crematogaster tenuicula Forel, 1904	Forel, 1904	Species	Ant	Fernandes, I.O. | Souza, J.L.P.	1	Individual
PreservedSpecimen	Morrinhos:Km4:2011:1	2017-09-13	Invertebrate Collection of INPA / Environmental monitoring of ants (Hymenoptera: Formicidae) in the influence areas of Santo Antônio Hydroelectric Power-Plant in Rondônia, Brazil		en	Instituto Nacional de Pesquisas da Amazônia (INPA)	INPA		Instituto Nacional de Pesquisas da Amazônia - INPA / Invertebrate Collection		BR:INPA:HYM:000126	Fernandes, I.O. | Souza, J.L.P.		female	adult	non-reprodutcive	alcohol	in collection / wet vial	Animalia	Arthropoda	Insecta	Hymenoptera	Formicidae	Crematogaster	tenuicula	Crematogaster tenuicula Forel, 1904	Forel, 1904	Species	Ant	Fernandes, I.O. | Souza, J.L.P.	1	Individual
PreservedSpecimen	Jaci-ParanáMD:Km4:2011:1	2017-09-13	Invertebrate Collection of INPA / Environmental monitoring of ants (Hymenoptera: Formicidae) in the influence areas of Santo Antônio Hydroelectric Power-Plant in Rondônia, Brazil		en	Instituto Nacional de Pesquisas da Amazônia (INPA)	INPA		Instituto Nacional de Pesquisas da Amazônia - INPA / Invertebrate Collection		BR:INPA:HYM:000127	Fernandes, I.O. | Souza, J.L.P.		female	adult	non-reprodutcive	alcohol	in collection / wet vial	Animalia	Arthropoda	Insecta	Hymenoptera	Formicidae	Cyphomyrmex	rimosus	Cyphomyrmex rimosus (Spinola, 1851)	(Spinola, 1851)	Species	Ant	Fernandes, I.O. | Souza, J.L.P.	1	Individual
PreservedSpecimen	Jaci-ParanáMD:Km4:2011:1	2017-09-13	Invertebrate Collection of INPA / Environmental monitoring of ants (Hymenoptera: Formicidae) in the influence areas of Santo Antônio Hydroelectric Power-Plant in Rondônia, Brazil		en	Instituto Nacional de Pesquisas da Amazônia (INPA)	INPA		Instituto Nacional de Pesquisas da Amazônia - INPA / Invertebrate Collection		BR:INPA:HYM:000128	Fernandes, I.O. | Souza, J.L.P.		female	adult	non-reprodutcive	alcohol	in collection / wet vial	Animalia	Arthropoda	Insecta	Hymenoptera	Formicidae	Cyphomyrmex	rimosus	Cyphomyrmex rimosus (Spinola, 1851)	(Spinola, 1851)	Species	Ant	Fernandes, I.O. | Souza, J.L.P.	1	Individual
PreservedSpecimen	Jaci-ParanáMD:Km0.5:2011:1	2017-09-13	Invertebrate Collection of INPA / Environmental monitoring of ants (Hymenoptera: Formicidae) in the influence areas of Santo Antônio Hydroelectric Power-Plant in Rondônia, Brazil		en	Instituto Nacional de Pesquisas da Amazônia (INPA)	INPA		Instituto Nacional de Pesquisas da Amazônia - INPA / Invertebrate Collection		BR:INPA:HYM:000129	Fernandes, I.O. | Souza, J.L.P.		female	adult	non-reprodutcive	alcohol	in collection / wet vial	Animalia	Arthropoda	Insecta	Hymenoptera	Formicidae	Cyphomyrmex	rimosus	Cyphomyrmex rimosus (Spinola, 1851)	(Spinola, 1851)	Species	Ant	Fernandes, I.O. | Souza, J.L.P.	1	Individual
PreservedSpecimen	IlhaBúfalos:km1:2011:1	2017-09-13	Invertebrate Collection of INPA / Environmental monitoring of ants (Hymenoptera: Formicidae) in the influence areas of Santo Antônio Hydroelectric Power-Plant in Rondônia, Brazil		en	Instituto Nacional de Pesquisas da Amazônia (INPA)	INPA		Instituto Nacional de Pesquisas da Amazônia - INPA / Invertebrate Collection		BR:INPA:HYM:000130	Fernandes, I.O. | Souza, J.L.P.		female	adult	non-reprodutcive	alcohol	in collection / wet vial	Animalia	Arthropoda	Insecta	Hymenoptera	Formicidae	Cyphomyrmex	rimosus	Cyphomyrmex rimosus (Spinola, 1851)	(Spinola, 1851)	Species	Ant	Fernandes, I.O. | Souza, J.L.P.	1	Individual
PreservedSpecimen	IlhaPedras:km0:2011:1	2017-09-13	Invertebrate Collection of INPA / Environmental monitoring of ants (Hymenoptera: Formicidae) in the influence areas of Santo Antônio Hydroelectric Power-Plant in Rondônia, Brazil		en	Instituto Nacional de Pesquisas da Amazônia (INPA)	INPA		Instituto Nacional de Pesquisas da Amazônia - INPA / Invertebrate Collection		BR:INPA:HYM:000131	Fernandes, I.O. | Souza, J.L.P.		female	adult	non-reprodutcive	alcohol	in collection / wet vial	Animalia	Arthropoda	Insecta	Hymenoptera	Formicidae	Cyphomyrmex	rimosus	Cyphomyrmex rimosus (Spinola, 1851)	(Spinola, 1851)	Species	Ant	Fernandes, I.O. | Souza, J.L.P.	1	Individual
PreservedSpecimen	Jaci-ParanáMD:Km2:2011:1	2017-09-13	Invertebrate Collection of INPA / Environmental monitoring of ants (Hymenoptera: Formicidae) in the influence areas of Santo Antônio Hydroelectric Power-Plant in Rondônia, Brazil		en	Instituto Nacional de Pesquisas da Amazônia (INPA)	INPA		Instituto Nacional de Pesquisas da Amazônia - INPA / Invertebrate Collection		BR:INPA:HYM:000132	Fernandes, I.O. | Souza, J.L.P.		female	adult	non-reprodutcive	alcohol	in collection / wet vial	Animalia	Arthropoda	Insecta	Hymenoptera	Formicidae	Cyphomyrmex	rimosus	Cyphomyrmex rimosus (Spinola, 1851)	(Spinola, 1851)	Species	Ant	Fernandes, I.O. | Souza, J.L.P.	1	Individual
PreservedSpecimen	IlhaPedras:km4:2011:1	2017-09-13	Invertebrate Collection of INPA / Environmental monitoring of ants (Hymenoptera: Formicidae) in the influence areas of Santo Antônio Hydroelectric Power-Plant in Rondônia, Brazil		en	Instituto Nacional de Pesquisas da Amazônia (INPA)	INPA		Instituto Nacional de Pesquisas da Amazônia - INPA / Invertebrate Collection		BR:INPA:HYM:000133	Fernandes, I.O. | Souza, J.L.P.		female	adult	non-reprodutcive	alcohol	in collection / wet vial	Animalia	Arthropoda	Insecta	Hymenoptera	Formicidae	Cyphomyrmex	rimosus	Cyphomyrmex rimosus (Spinola, 1851)	(Spinola, 1851)	Species	Ant	Fernandes, I.O. | Souza, J.L.P.	1	Individual
PreservedSpecimen	IlhaPedras:km0:2011:1	2017-09-13	Invertebrate Collection of INPA / Environmental monitoring of ants (Hymenoptera: Formicidae) in the influence areas of Santo Antônio Hydroelectric Power-Plant in Rondônia, Brazil		en	Instituto Nacional de Pesquisas da Amazônia (INPA)	INPA		Instituto Nacional de Pesquisas da Amazônia - INPA / Invertebrate Collection		BR:INPA:HYM:000134	Fernandes, I.O. | Souza, J.L.P.		female	adult	non-reprodutcive	alcohol	in collection / wet vial	Animalia	Arthropoda	Insecta	Hymenoptera	Formicidae	Cyphomyrmex	rimosus	Cyphomyrmex rimosus (Spinola, 1851)	(Spinola, 1851)	Species	Ant	Fernandes, I.O. | Souza, J.L.P.	1	Individual
PreservedSpecimen	Jaci-ParanáMD:Km0.5:2011:1	2017-09-13	Invertebrate Collection of INPA / Environmental monitoring of ants (Hymenoptera: Formicidae) in the influence areas of Santo Antônio Hydroelectric Power-Plant in Rondônia, Brazil		en	Instituto Nacional de Pesquisas da Amazônia (INPA)	INPA		Instituto Nacional de Pesquisas da Amazônia - INPA / Invertebrate Collection		BR:INPA:HYM:000135	Fernandes, I.O. | Souza, J.L.P.		female	adult	non-reprodutcive	alcohol	in collection / wet vial	Animalia	Arthropoda	Insecta	Hymenoptera	Formicidae	Cyphomyrmex	rimosus	Cyphomyrmex rimosus (Spinola, 1851)	(Spinola, 1851)	Species	Ant	Fernandes, I.O. | Souza, J.L.P.	1	Individual
PreservedSpecimen	Morrinhos:Km1:2011:1	2017-09-13	Invertebrate Collection of INPA / Environmental monitoring of ants (Hymenoptera: Formicidae) in the influence areas of Santo Antônio Hydroelectric Power-Plant in Rondônia, Brazil		en	Instituto Nacional de Pesquisas da Amazônia (INPA)	INPA		Instituto Nacional de Pesquisas da Amazônia - INPA / Invertebrate Collection		BR:INPA:HYM:000136	Fernandes, I.O. | Souza, J.L.P.		female	adult	non-reprodutcive	alcohol	in collection / wet vial	Animalia	Arthropoda	Insecta	Hymenoptera	Formicidae	Cyphomyrmex	rimosus	Cyphomyrmex rimosus (Spinola, 1851)	(Spinola, 1851)	Species	Ant	Fernandes, I.O. | Souza, J.L.P.	1	Individual
PreservedSpecimen	Jaci-ParanáMD:Km3:2011:1	2017-09-13	Invertebrate Collection of INPA / Environmental monitoring of ants (Hymenoptera: Formicidae) in the influence areas of Santo Antônio Hydroelectric Power-Plant in Rondônia, Brazil		en	Instituto Nacional de Pesquisas da Amazônia (INPA)	INPA		Instituto Nacional de Pesquisas da Amazônia - INPA / Invertebrate Collection		BR:INPA:HYM:000137	Fernandes, I.O. | Souza, J.L.P.		female	adult	non-reprodutcive	alcohol	in collection / wet vial	Animalia	Arthropoda	Insecta	Hymenoptera	Formicidae	Cyphomyrmex	rimosus	Cyphomyrmex rimosus (Spinola, 1851)	(Spinola, 1851)	Species	Ant	Fernandes, I.O. | Souza, J.L.P.	1	Individual
PreservedSpecimen	IlhaPedras:km4:2011:1	2017-09-13	Invertebrate Collection of INPA / Environmental monitoring of ants (Hymenoptera: Formicidae) in the influence areas of Santo Antônio Hydroelectric Power-Plant in Rondônia, Brazil		en	Instituto Nacional de Pesquisas da Amazônia (INPA)	INPA		Instituto Nacional de Pesquisas da Amazônia - INPA / Invertebrate Collection		BR:INPA:HYM:000138	Fernandes, I.O. | Souza, J.L.P.		female	adult	non-reprodutcive	alcohol	in collection / wet vial	Animalia	Arthropoda	Insecta	Hymenoptera	Formicidae	Cyphomyrmex	rimosus	Cyphomyrmex rimosus (Spinola, 1851)	(Spinola, 1851)	Species	Ant	Fernandes, I.O. | Souza, J.L.P.	1	Individual
PreservedSpecimen	IlhaPedras:km0.5:2011:1	2017-09-13	Invertebrate Collection of INPA / Environmental monitoring of ants (Hymenoptera: Formicidae) in the influence areas of Santo Antônio Hydroelectric Power-Plant in Rondônia, Brazil		en	Instituto Nacional de Pesquisas da Amazônia (INPA)	INPA		Instituto Nacional de Pesquisas da Amazônia - INPA / Invertebrate Collection		BR:INPA:HYM:000139	Fernandes, I.O. | Souza, J.L.P.		female	adult	non-reprodutcive	alcohol	in collection / wet vial	Animalia	Arthropoda	Insecta	Hymenoptera	Formicidae	Cyphomyrmex	peltatus	Cyphomyrmex peltatus Kempf, 1966	Kempf, 1966	Species	Ant	Fernandes, I.O. | Souza, J.L.P.	1	Individual
PreservedSpecimen	IlhaPedras:km2:2011:1	2017-09-13	Invertebrate Collection of INPA / Environmental monitoring of ants (Hymenoptera: Formicidae) in the influence areas of Santo Antônio Hydroelectric Power-Plant in Rondônia, Brazil		en	Instituto Nacional de Pesquisas da Amazônia (INPA)	INPA		Instituto Nacional de Pesquisas da Amazônia - INPA / Invertebrate Collection		BR:INPA:HYM:000140	Fernandes, I.O. | Souza, J.L.P.		female	adult	non-reprodutcive	alcohol	in collection / wet vial	Animalia	Arthropoda	Insecta	Hymenoptera	Formicidae	Cyphomyrmex	peltatus	Cyphomyrmex peltatus Kempf, 1966	Kempf, 1966	Species	Ant	Fernandes, I.O. | Souza, J.L.P.	1	Individual
PreservedSpecimen	IlhaBúfalos:km0.5:2011:1	2017-09-13	Invertebrate Collection of INPA / Environmental monitoring of ants (Hymenoptera: Formicidae) in the influence areas of Santo Antônio Hydroelectric Power-Plant in Rondônia, Brazil		en	Instituto Nacional de Pesquisas da Amazônia (INPA)	INPA		Instituto Nacional de Pesquisas da Amazônia - INPA / Invertebrate Collection		BR:INPA:HYM:000141	Fernandes, I.O. | Souza, J.L.P.		female	adult	non-reprodutcive	alcohol	in collection / wet vial	Animalia	Arthropoda	Insecta	Hymenoptera	Formicidae	Cyphomyrmex	peltatus	Cyphomyrmex peltatus Kempf, 1966	Kempf, 1966	Species	Ant	Fernandes, I.O. | Souza, J.L.P.	1	Individual
PreservedSpecimen	Jaci-ParanáMD:Km2:2011:1	2017-09-13	Invertebrate Collection of INPA / Environmental monitoring of ants (Hymenoptera: Formicidae) in the influence areas of Santo Antônio Hydroelectric Power-Plant in Rondônia, Brazil		en	Instituto Nacional de Pesquisas da Amazônia (INPA)	INPA		Instituto Nacional de Pesquisas da Amazônia - INPA / Invertebrate Collection		BR:INPA:HYM:000142	Fernandes, I.O. | Souza, J.L.P.		female	adult	non-reprodutcive	alcohol	in collection / wet vial	Animalia	Arthropoda	Insecta	Hymenoptera	Formicidae	Cyphomyrmex	peltatus	Cyphomyrmex peltatus Kempf, 1966	Kempf, 1966	Species	Ant	Fernandes, I.O. | Souza, J.L.P.	1	Individual
PreservedSpecimen	IlhaBúfalos:km4:2011:1	2017-09-13	Invertebrate Collection of INPA / Environmental monitoring of ants (Hymenoptera: Formicidae) in the influence areas of Santo Antônio Hydroelectric Power-Plant in Rondônia, Brazil		en	Instituto Nacional de Pesquisas da Amazônia (INPA)	INPA		Instituto Nacional de Pesquisas da Amazônia - INPA / Invertebrate Collection		BR:INPA:HYM:000143	Fernandes, I.O. | Souza, J.L.P.		female	adult	non-reprodutcive	alcohol	in collection / wet vial	Animalia	Arthropoda	Insecta	Hymenoptera	Formicidae	Cyphomyrmex	peltatus	Cyphomyrmex peltatus Kempf, 1966	Kempf, 1966	Species	Ant	Fernandes, I.O. | Souza, J.L.P.	1	Individual
PreservedSpecimen	IlhaBúfalos:km1:2011:1	2017-09-13	Invertebrate Collection of INPA / Environmental monitoring of ants (Hymenoptera: Formicidae) in the influence areas of Santo Antônio Hydroelectric Power-Plant in Rondônia, Brazil		en	Instituto Nacional de Pesquisas da Amazônia (INPA)	INPA		Instituto Nacional de Pesquisas da Amazônia - INPA / Invertebrate Collection		BR:INPA:HYM:000144	Fernandes, I.O. | Souza, J.L.P.		female	adult	non-reprodutcive	alcohol	in collection / wet vial	Animalia	Arthropoda	Insecta	Hymenoptera	Formicidae	Cyphomyrmex	peltatus	Cyphomyrmex peltatus Kempf, 1966	Kempf, 1966	Species	Ant	Fernandes, I.O. | Souza, J.L.P.	1	Individual
PreservedSpecimen	IlhaPedras:km1:2011:1	2017-09-13	Invertebrate Collection of INPA / Environmental monitoring of ants (Hymenoptera: Formicidae) in the influence areas of Santo Antônio Hydroelectric Power-Plant in Rondônia, Brazil		en	Instituto Nacional de Pesquisas da Amazônia (INPA)	INPA		Instituto Nacional de Pesquisas da Amazônia - INPA / Invertebrate Collection		BR:INPA:HYM:000145	Fernandes, I.O. | Souza, J.L.P.		female	adult	non-reprodutcive	alcohol	in collection / wet vial	Animalia	Arthropoda	Insecta	Hymenoptera	Formicidae	Dinoponera	gigantea	Dinoponera gigantea (Perty, 1833)	(Perty, 1833)	Species	Ant	Fernandes, I.O. | Souza, J.L.P.	1	Individual
PreservedSpecimen	IlhaPedras:km2:2011:1	2017-09-13	Invertebrate Collection of INPA / Environmental monitoring of ants (Hymenoptera: Formicidae) in the influence areas of Santo Antônio Hydroelectric Power-Plant in Rondônia, Brazil		en	Instituto Nacional de Pesquisas da Amazônia (INPA)	INPA		Instituto Nacional de Pesquisas da Amazônia - INPA / Invertebrate Collection		BR:INPA:HYM:000146	Fernandes, I.O. | Souza, J.L.P.		female	adult	non-reprodutcive	alcohol	in collection / wet vial	Animalia	Arthropoda	Insecta	Hymenoptera	Formicidae	Discothyrea	humilis	Discothyrea humilis Weber, 1939	Weber, 1939	Species	Ant	Fernandes, I.O. | Souza, J.L.P.	1	Individual
PreservedSpecimen	Jaci-ParanáMD:Km3:2011:1	2017-09-13	Invertebrate Collection of INPA / Environmental monitoring of ants (Hymenoptera: Formicidae) in the influence areas of Santo Antônio Hydroelectric Power-Plant in Rondônia, Brazil		en	Instituto Nacional de Pesquisas da Amazônia (INPA)	INPA		Instituto Nacional de Pesquisas da Amazônia - INPA / Invertebrate Collection		BR:INPA:HYM:000147	Fernandes, I.O. | Souza, J.L.P.		female	adult	non-reprodutcive	alcohol	in collection / wet vial	Animalia	Arthropoda	Insecta	Hymenoptera	Formicidae	Discothyrea	humilis	Discothyrea humilis Weber, 1939	Weber, 1939	Species	Ant	Fernandes, I.O. | Souza, J.L.P.	1	Individual
PreservedSpecimen	IlhaPedras:km2:2011:1	2017-09-13	Invertebrate Collection of INPA / Environmental monitoring of ants (Hymenoptera: Formicidae) in the influence areas of Santo Antônio Hydroelectric Power-Plant in Rondônia, Brazil		en	Instituto Nacional de Pesquisas da Amazônia (INPA)	INPA		Instituto Nacional de Pesquisas da Amazônia - INPA / Invertebrate Collection		BR:INPA:HYM:000148	Fernandes, I.O. | Souza, J.L.P.		female	adult	non-reprodutcive	alcohol	in collection / wet vial	Animalia	Arthropoda	Insecta	Hymenoptera	Formicidae	Discothyrea	sexarticulata	Discothyrea sexarticulata Borgmeier, 1954	Borgmeier, 1954	Species	Ant	Fernandes, I.O. | Souza, J.L.P.	1	Individual
PreservedSpecimen	Jaci-ParanáMD:Km4:2011:1	2017-09-13	Invertebrate Collection of INPA / Environmental monitoring of ants (Hymenoptera: Formicidae) in the influence areas of Santo Antônio Hydroelectric Power-Plant in Rondônia, Brazil		en	Instituto Nacional de Pesquisas da Amazônia (INPA)	INPA		Instituto Nacional de Pesquisas da Amazônia - INPA / Invertebrate Collection		BR:INPA:HYM:000149	Fernandes, I.O. | Souza, J.L.P.		female	adult	non-reprodutcive	alcohol	in collection / wet vial	Animalia	Arthropoda	Insecta	Hymenoptera	Formicidae	Discothyrea	denticulata	Discothyrea denticulata Weber, 1939	Weber, 1939	Species	Ant	Fernandes, I.O. | Souza, J.L.P.	1	Individual
PreservedSpecimen	Jaci-ParanáMD:Km4:2011:1	2017-09-13	Invertebrate Collection of INPA / Environmental monitoring of ants (Hymenoptera: Formicidae) in the influence areas of Santo Antônio Hydroelectric Power-Plant in Rondônia, Brazil		en	Instituto Nacional de Pesquisas da Amazônia (INPA)	INPA		Instituto Nacional de Pesquisas da Amazônia - INPA / Invertebrate Collection		BR:INPA:HYM:000150	Fernandes, I.O. | Souza, J.L.P.		female	adult	non-reprodutcive	alcohol	in collection / wet vial	Animalia	Arthropoda	Insecta	Hymenoptera	Formicidae	Dolichoderus	bidens	Dolichoderus bidens (Linnaeus, 1758)	(Linnaeus, 1758)	Species	Ant	Fernandes, I.O. | Souza, J.L.P.	1	Individual
PreservedSpecimen	IlhaBúfalos:km0.5:2011:1	2017-09-13	Invertebrate Collection of INPA / Environmental monitoring of ants (Hymenoptera: Formicidae) in the influence areas of Santo Antônio Hydroelectric Power-Plant in Rondônia, Brazil		en	Instituto Nacional de Pesquisas da Amazônia (INPA)	INPA		Instituto Nacional de Pesquisas da Amazônia - INPA / Invertebrate Collection		BR:INPA:HYM:000151	Fernandes, I.O. | Souza, J.L.P.		female	adult	non-reprodutcive	alcohol	in collection / wet vial	Animalia	Arthropoda	Insecta	Hymenoptera	Formicidae	Dolichoderus	bispinosus	Dolichoderus bispinosus (Olivier, 1792)	(Olivier, 1792)	Species	Ant	Fernandes, I.O. | Souza, J.L.P.	1	Individual
PreservedSpecimen	IlhaBúfalos:km0:2011:1	2017-09-13	Invertebrate Collection of INPA / Environmental monitoring of ants (Hymenoptera: Formicidae) in the influence areas of Santo Antônio Hydroelectric Power-Plant in Rondônia, Brazil		en	Instituto Nacional de Pesquisas da Amazônia (INPA)	INPA		Instituto Nacional de Pesquisas da Amazônia - INPA / Invertebrate Collection		BR:INPA:HYM:000152	Fernandes, I.O. | Souza, J.L.P.		female	adult	non-reprodutcive	alcohol	in collection / wet vial	Animalia	Arthropoda	Insecta	Hymenoptera	Formicidae	Dolichoderus	bispinosus	Dolichoderus bispinosus (Olivier, 1792)	(Olivier, 1792)	Species	Ant	Fernandes, I.O. | Souza, J.L.P.	1	Individual
PreservedSpecimen	Jaci-ParanáMD:Km0:2011:1	2017-09-13	Invertebrate Collection of INPA / Environmental monitoring of ants (Hymenoptera: Formicidae) in the influence areas of Santo Antônio Hydroelectric Power-Plant in Rondônia, Brazil		en	Instituto Nacional de Pesquisas da Amazônia (INPA)	INPA		Instituto Nacional de Pesquisas da Amazônia - INPA / Invertebrate Collection		BR:INPA:HYM:000153	Fernandes, I.O. | Souza, J.L.P.		female	adult	non-reprodutcive	alcohol	in collection / wet vial	Animalia	Arthropoda	Insecta	Hymenoptera	Formicidae	Dolichoderus	bispinosus	Dolichoderus bispinosus (Olivier, 1792)	(Olivier, 1792)	Species	Ant	Fernandes, I.O. | Souza, J.L.P.	1	Individual
PreservedSpecimen	IlhaPedras:km2:2011:1	2017-09-13	Invertebrate Collection of INPA / Environmental monitoring of ants (Hymenoptera: Formicidae) in the influence areas of Santo Antônio Hydroelectric Power-Plant in Rondônia, Brazil		en	Instituto Nacional de Pesquisas da Amazônia (INPA)	INPA		Instituto Nacional de Pesquisas da Amazônia - INPA / Invertebrate Collection		BR:INPA:HYM:000154	Fernandes, I.O. | Souza, J.L.P.		female	adult	non-reprodutcive	alcohol	in collection / wet vial	Animalia	Arthropoda	Insecta	Hymenoptera	Formicidae	Dolichoderus	bispinosus	Dolichoderus bispinosus (Olivier, 1792)	(Olivier, 1792)	Species	Ant	Fernandes, I.O. | Souza, J.L.P.	1	Individual
PreservedSpecimen	Jaci-ParanáMD:Km2:2011:1	2017-09-13	Invertebrate Collection of INPA / Environmental monitoring of ants (Hymenoptera: Formicidae) in the influence areas of Santo Antônio Hydroelectric Power-Plant in Rondônia, Brazil		en	Instituto Nacional de Pesquisas da Amazônia (INPA)	INPA		Instituto Nacional de Pesquisas da Amazônia - INPA / Invertebrate Collection		BR:INPA:HYM:000155	Fernandes, I.O. | Souza, J.L.P.		female	adult	non-reprodutcive	alcohol	in collection / wet vial	Animalia	Arthropoda	Insecta	Hymenoptera	Formicidae	Dolichoderus	bispinosus	Dolichoderus bispinosus (Olivier, 1792)	(Olivier, 1792)	Species	Ant	Fernandes, I.O. | Souza, J.L.P.	1	Individual
PreservedSpecimen	IlhaPedras:km1:2011:1	2017-09-13	Invertebrate Collection of INPA / Environmental monitoring of ants (Hymenoptera: Formicidae) in the influence areas of Santo Antônio Hydroelectric Power-Plant in Rondônia, Brazil		en	Instituto Nacional de Pesquisas da Amazônia (INPA)	INPA		Instituto Nacional de Pesquisas da Amazônia - INPA / Invertebrate Collection		BR:INPA:HYM:000156	Fernandes, I.O. | Souza, J.L.P.		female	adult	non-reprodutcive	alcohol	in collection / wet vial	Animalia	Arthropoda	Insecta	Hymenoptera	Formicidae	Dolichoderus	bispinosus	Dolichoderus bispinosus (Olivier, 1792)	(Olivier, 1792)	Species	Ant	Fernandes, I.O. | Souza, J.L.P.	1	Individual
PreservedSpecimen	Jaci-ParanáMD:Km0:2011:1	2017-09-13	Invertebrate Collection of INPA / Environmental monitoring of ants (Hymenoptera: Formicidae) in the influence areas of Santo Antônio Hydroelectric Power-Plant in Rondônia, Brazil		en	Instituto Nacional de Pesquisas da Amazônia (INPA)	INPA		Instituto Nacional de Pesquisas da Amazônia - INPA / Invertebrate Collection		BR:INPA:HYM:000157	Fernandes, I.O. | Souza, J.L.P.		female	adult	non-reprodutcive	alcohol	in collection / wet vial	Animalia	Arthropoda	Insecta	Hymenoptera	Formicidae	Dolichoderus	decollatus	Dolichoderus decollatus Smith, 1858	Smith, 1858	Species	Ant	Fernandes, I.O. | Souza, J.L.P.	1	Individual
PreservedSpecimen	Morrinhos:Km3:2011:1	2017-09-13	Invertebrate Collection of INPA / Environmental monitoring of ants (Hymenoptera: Formicidae) in the influence areas of Santo Antônio Hydroelectric Power-Plant in Rondônia, Brazil		en	Instituto Nacional de Pesquisas da Amazônia (INPA)	INPA		Instituto Nacional de Pesquisas da Amazônia - INPA / Invertebrate Collection		BR:INPA:HYM:000158	Fernandes, I.O. | Souza, J.L.P.		female	adult	non-reprodutcive	alcohol	in collection / wet vial	Animalia	Arthropoda	Insecta	Hymenoptera	Formicidae	Eciton	burchellii	Eciton burchellii (Westwood, 1842)	(Westwood, 1842)	Species	Ant	Fernandes, I.O. | Souza, J.L.P.	1	Individual
PreservedSpecimen	Morrinhos:Km3:2011:1	2017-09-13	Invertebrate Collection of INPA / Environmental monitoring of ants (Hymenoptera: Formicidae) in the influence areas of Santo Antônio Hydroelectric Power-Plant in Rondônia, Brazil		en	Instituto Nacional de Pesquisas da Amazônia (INPA)	INPA		Instituto Nacional de Pesquisas da Amazônia - INPA / Invertebrate Collection		BR:INPA:HYM:000159	Fernandes, I.O. | Souza, J.L.P.		female	adult	non-reprodutcive	alcohol	in collection / wet vial	Animalia	Arthropoda	Insecta	Hymenoptera	Formicidae	Eciton	burchellii	Eciton burchellii (Westwood, 1842)	(Westwood, 1842)	Species	Ant	Fernandes, I.O. | Souza, J.L.P.	1	Individual
PreservedSpecimen	IlhaPedras:km2:2011:1	2017-09-13	Invertebrate Collection of INPA / Environmental monitoring of ants (Hymenoptera: Formicidae) in the influence areas of Santo Antônio Hydroelectric Power-Plant in Rondônia, Brazil		en	Instituto Nacional de Pesquisas da Amazônia (INPA)	INPA		Instituto Nacional de Pesquisas da Amazônia - INPA / Invertebrate Collection		BR:INPA:HYM:000160	Fernandes, I.O. | Souza, J.L.P.		female	adult	non-reprodutcive	alcohol	in collection / wet vial	Animalia	Arthropoda	Insecta	Hymenoptera	Formicidae	Ectatomma	lugens	Ectatomma lugens Emery, 1894	Emery, 1894	Species	Ant	Fernandes, I.O. | Souza, J.L.P.	1	Individual
PreservedSpecimen	IlhaPedras:km1:2011:1	2017-09-13	Invertebrate Collection of INPA / Environmental monitoring of ants (Hymenoptera: Formicidae) in the influence areas of Santo Antônio Hydroelectric Power-Plant in Rondônia, Brazil		en	Instituto Nacional de Pesquisas da Amazônia (INPA)	INPA		Instituto Nacional de Pesquisas da Amazônia - INPA / Invertebrate Collection		BR:INPA:HYM:000161	Fernandes, I.O. | Souza, J.L.P.		female	adult	non-reprodutcive	alcohol	in collection / wet vial	Animalia	Arthropoda	Insecta	Hymenoptera	Formicidae	Ectatomma	lugens	Ectatomma lugens Emery, 1894	Emery, 1894	Species	Ant	Fernandes, I.O. | Souza, J.L.P.	1	Individual
PreservedSpecimen	IlhaBúfalos:km0.5:2011:1	2017-09-13	Invertebrate Collection of INPA / Environmental monitoring of ants (Hymenoptera: Formicidae) in the influence areas of Santo Antônio Hydroelectric Power-Plant in Rondônia, Brazil		en	Instituto Nacional de Pesquisas da Amazônia (INPA)	INPA		Instituto Nacional de Pesquisas da Amazônia - INPA / Invertebrate Collection		BR:INPA:HYM:000162	Fernandes, I.O. | Souza, J.L.P.		female	adult	non-reprodutcive	alcohol	in collection / wet vial	Animalia	Arthropoda	Insecta	Hymenoptera	Formicidae	Ectatomma	lugens	Ectatomma lugens Emery, 1894	Emery, 1894	Species	Ant	Fernandes, I.O. | Souza, J.L.P.	1	Individual
PreservedSpecimen	Jaci-ParanáMD:Km0:2011:1	2017-09-13	Invertebrate Collection of INPA / Environmental monitoring of ants (Hymenoptera: Formicidae) in the influence areas of Santo Antônio Hydroelectric Power-Plant in Rondônia, Brazil		en	Instituto Nacional de Pesquisas da Amazônia (INPA)	INPA		Instituto Nacional de Pesquisas da Amazônia - INPA / Invertebrate Collection		BR:INPA:HYM:000163	Fernandes, I.O. | Souza, J.L.P.		female	adult	non-reprodutcive	alcohol	in collection / wet vial	Animalia	Arthropoda	Insecta	Hymenoptera	Formicidae	Ectatomma	lugens	Ectatomma lugens Emery, 1894	Emery, 1894	Species	Ant	Fernandes, I.O. | Souza, J.L.P.	1	Individual
PreservedSpecimen	IlhaBúfalos:km0.5:2011:1	2017-09-13	Invertebrate Collection of INPA / Environmental monitoring of ants (Hymenoptera: Formicidae) in the influence areas of Santo Antônio Hydroelectric Power-Plant in Rondônia, Brazil		en	Instituto Nacional de Pesquisas da Amazônia (INPA)	INPA		Instituto Nacional de Pesquisas da Amazônia - INPA / Invertebrate Collection		BR:INPA:HYM:000164	Fernandes, I.O. | Souza, J.L.P.		female	adult	non-reprodutcive	alcohol	in collection / wet vial	Animalia	Arthropoda	Insecta	Hymenoptera	Formicidae	Ectatomma	lugens	Ectatomma lugens Emery, 1894	Emery, 1894	Species	Ant	Fernandes, I.O. | Souza, J.L.P.	1	Individual
PreservedSpecimen	Jaci-ParanáMD:Km3:2011:1	2017-09-13	Invertebrate Collection of INPA / Environmental monitoring of ants (Hymenoptera: Formicidae) in the influence areas of Santo Antônio Hydroelectric Power-Plant in Rondônia, Brazil		en	Instituto Nacional de Pesquisas da Amazônia (INPA)	INPA		Instituto Nacional de Pesquisas da Amazônia - INPA / Invertebrate Collection		BR:INPA:HYM:000165	Fernandes, I.O. | Souza, J.L.P.		female	adult	non-reprodutcive	alcohol	in collection / wet vial	Animalia	Arthropoda	Insecta	Hymenoptera	Formicidae	Ectatomma	lugens	Ectatomma lugens Emery, 1894	Emery, 1894	Species	Ant	Fernandes, I.O. | Souza, J.L.P.	1	Individual
PreservedSpecimen	IlhaPedras:km0.5:2011:1	2017-09-13	Invertebrate Collection of INPA / Environmental monitoring of ants (Hymenoptera: Formicidae) in the influence areas of Santo Antônio Hydroelectric Power-Plant in Rondônia, Brazil		en	Instituto Nacional de Pesquisas da Amazônia (INPA)	INPA		Instituto Nacional de Pesquisas da Amazônia - INPA / Invertebrate Collection		BR:INPA:HYM:000166	Fernandes, I.O. | Souza, J.L.P.		female	adult	non-reprodutcive	alcohol	in collection / wet vial	Animalia	Arthropoda	Insecta	Hymenoptera	Formicidae	Gigantiops	destructor	Gigantiops destructor (Fabricius, 1804)	(Fabricius, 1804)	Species	Ant	Fernandes, I.O. | Souza, J.L.P.	1	Individual
PreservedSpecimen	IlhaPedras:km3:2011:1	2017-09-13	Invertebrate Collection of INPA / Environmental monitoring of ants (Hymenoptera: Formicidae) in the influence areas of Santo Antônio Hydroelectric Power-Plant in Rondônia, Brazil		en	Instituto Nacional de Pesquisas da Amazônia (INPA)	INPA		Instituto Nacional de Pesquisas da Amazônia - INPA / Invertebrate Collection		BR:INPA:HYM:000167	Fernandes, I.O. | Souza, J.L.P.		female	adult	non-reprodutcive	alcohol	in collection / wet vial	Animalia	Arthropoda	Insecta	Hymenoptera	Formicidae	Gnamptogenys	relicta	Gnamptogenys relicta (Mann, 1916)	(Mann, 1916)	Species	Ant	Fernandes, I.O. | Souza, J.L.P.	1	Individual
PreservedSpecimen	Jaci-ParanáMD:Km3:2011:1	2017-09-13	Invertebrate Collection of INPA / Environmental monitoring of ants (Hymenoptera: Formicidae) in the influence areas of Santo Antônio Hydroelectric Power-Plant in Rondônia, Brazil		en	Instituto Nacional de Pesquisas da Amazônia (INPA)	INPA		Instituto Nacional de Pesquisas da Amazônia - INPA / Invertebrate Collection		BR:INPA:HYM:000168	Fernandes, I.O. | Souza, J.L.P.		female	adult	non-reprodutcive	alcohol	in collection / wet vial	Animalia	Arthropoda	Insecta	Hymenoptera	Formicidae	Gnamptogenys	relicta	Gnamptogenys relicta (Mann, 1916)	(Mann, 1916)	Species	Ant	Fernandes, I.O. | Souza, J.L.P.	1	Individual
PreservedSpecimen	Morrinhos:Km0:2011:1	2017-09-13	Invertebrate Collection of INPA / Environmental monitoring of ants (Hymenoptera: Formicidae) in the influence areas of Santo Antônio Hydroelectric Power-Plant in Rondônia, Brazil		en	Instituto Nacional de Pesquisas da Amazônia (INPA)	INPA		Instituto Nacional de Pesquisas da Amazônia - INPA / Invertebrate Collection		BR:INPA:HYM:000169	Fernandes, I.O. | Souza, J.L.P.		female	adult	non-reprodutcive	alcohol	in collection / wet vial	Animalia	Arthropoda	Insecta	Hymenoptera	Formicidae	Gnamptogenys	relicta	Gnamptogenys relicta (Mann, 1916)	(Mann, 1916)	Species	Ant	Fernandes, I.O. | Souza, J.L.P.	1	Individual
PreservedSpecimen	IlhaPedras:km4:2011:1	2017-09-13	Invertebrate Collection of INPA / Environmental monitoring of ants (Hymenoptera: Formicidae) in the influence areas of Santo Antônio Hydroelectric Power-Plant in Rondônia, Brazil		en	Instituto Nacional de Pesquisas da Amazônia (INPA)	INPA		Instituto Nacional de Pesquisas da Amazônia - INPA / Invertebrate Collection		BR:INPA:HYM:000170	Fernandes, I.O. | Souza, J.L.P.		female	adult	non-reprodutcive	alcohol	in collection / wet vial	Animalia	Arthropoda	Insecta	Hymenoptera	Formicidae	Gnamptogenys	relicta	Gnamptogenys relicta (Mann, 1916)	(Mann, 1916)	Species	Ant	Fernandes, I.O. | Souza, J.L.P.	1	Individual
PreservedSpecimen	Morrinhos:Km0.5:2011:1	2017-09-13	Invertebrate Collection of INPA / Environmental monitoring of ants (Hymenoptera: Formicidae) in the influence areas of Santo Antônio Hydroelectric Power-Plant in Rondônia, Brazil		en	Instituto Nacional de Pesquisas da Amazônia (INPA)	INPA		Instituto Nacional de Pesquisas da Amazônia - INPA / Invertebrate Collection		BR:INPA:HYM:000171	Fernandes, I.O. | Souza, J.L.P.		female	adult	non-reprodutcive	alcohol	in collection / wet vial	Animalia	Arthropoda	Insecta	Hymenoptera	Formicidae	Gnamptogenys	relicta	Gnamptogenys relicta (Mann, 1916)	(Mann, 1916)	Species	Ant	Fernandes, I.O. | Souza, J.L.P.	1	Individual
PreservedSpecimen	IlhaPedras:km3:2011:1	2017-09-13	Invertebrate Collection of INPA / Environmental monitoring of ants (Hymenoptera: Formicidae) in the influence areas of Santo Antônio Hydroelectric Power-Plant in Rondônia, Brazil		en	Instituto Nacional de Pesquisas da Amazônia (INPA)	INPA		Instituto Nacional de Pesquisas da Amazônia - INPA / Invertebrate Collection		BR:INPA:HYM:000172	Fernandes, I.O. | Souza, J.L.P.		female	adult	non-reprodutcive	alcohol	in collection / wet vial	Animalia	Arthropoda	Insecta	Hymenoptera	Formicidae	Gnamptogenys	relicta	Gnamptogenys relicta (Mann, 1916)	(Mann, 1916)	Species	Ant	Fernandes, I.O. | Souza, J.L.P.	1	Individual
PreservedSpecimen	IlhaBúfalos:km0.5:2011:1	2017-09-13	Invertebrate Collection of INPA / Environmental monitoring of ants (Hymenoptera: Formicidae) in the influence areas of Santo Antônio Hydroelectric Power-Plant in Rondônia, Brazil		en	Instituto Nacional de Pesquisas da Amazônia (INPA)	INPA		Instituto Nacional de Pesquisas da Amazônia - INPA / Invertebrate Collection		BR:INPA:HYM:000173	Fernandes, I.O. | Souza, J.L.P.		female	adult	non-reprodutcive	alcohol	in collection / wet vial	Animalia	Arthropoda	Insecta	Hymenoptera	Formicidae	Gnamptogenys		Gnamptogenys Roger, 1863	Roger, 1863	Genus	Ant	Fernandes, I.O. | Souza, J.L.P.	1	Individual
PreservedSpecimen	IlhaBúfalos:km1:2011:1	2017-09-13	Invertebrate Collection of INPA / Environmental monitoring of ants (Hymenoptera: Formicidae) in the influence areas of Santo Antônio Hydroelectric Power-Plant in Rondônia, Brazil		en	Instituto Nacional de Pesquisas da Amazônia (INPA)	INPA		Instituto Nacional de Pesquisas da Amazônia - INPA / Invertebrate Collection		BR:INPA:HYM:000174	Fernandes, I.O. | Souza, J.L.P.		female	adult	non-reprodutcive	alcohol	in collection / wet vial	Animalia	Arthropoda	Insecta	Hymenoptera	Formicidae	Gnamptogenys		Gnamptogenys Roger, 1863	Roger, 1863	Genus	Ant	Fernandes, I.O. | Souza, J.L.P.	1	Individual
PreservedSpecimen	IlhaBúfalos:km4:2011:1	2017-09-13	Invertebrate Collection of INPA / Environmental monitoring of ants (Hymenoptera: Formicidae) in the influence areas of Santo Antônio Hydroelectric Power-Plant in Rondônia, Brazil		en	Instituto Nacional de Pesquisas da Amazônia (INPA)	INPA		Instituto Nacional de Pesquisas da Amazônia - INPA / Invertebrate Collection		BR:INPA:HYM:000175	Fernandes, I.O. | Souza, J.L.P.		female	adult	non-reprodutcive	alcohol	in collection / wet vial	Animalia	Arthropoda	Insecta	Hymenoptera	Formicidae	Gnamptogenys	horni	Gnamptogenys horni (Santschi, 1929)	(Santschi, 1929)	Species	Ant	Fernandes, I.O. | Souza, J.L.P.	1	Individual
PreservedSpecimen	IlhaBúfalos:km1:2011:1	2017-09-13	Invertebrate Collection of INPA / Environmental monitoring of ants (Hymenoptera: Formicidae) in the influence areas of Santo Antônio Hydroelectric Power-Plant in Rondônia, Brazil		en	Instituto Nacional de Pesquisas da Amazônia (INPA)	INPA		Instituto Nacional de Pesquisas da Amazônia - INPA / Invertebrate Collection		BR:INPA:HYM:000176	Fernandes, I.O. | Souza, J.L.P.		female	adult	non-reprodutcive	alcohol	in collection / wet vial	Animalia	Arthropoda	Insecta	Hymenoptera	Formicidae	Gnamptogenys	acuminata	Gnamptogenys acuminata (Emery, 1896)	(Emery, 1896)	Species	Ant	Fernandes, I.O. | Souza, J.L.P.	1	Individual
PreservedSpecimen	IlhaBúfalos:km4:2011:1	2017-09-13	Invertebrate Collection of INPA / Environmental monitoring of ants (Hymenoptera: Formicidae) in the influence areas of Santo Antônio Hydroelectric Power-Plant in Rondônia, Brazil		en	Instituto Nacional de Pesquisas da Amazônia (INPA)	INPA		Instituto Nacional de Pesquisas da Amazônia - INPA / Invertebrate Collection		BR:INPA:HYM:000177	Fernandes, I.O. | Souza, J.L.P.		female	adult	non-reprodutcive	alcohol	in collection / wet vial	Animalia	Arthropoda	Insecta	Hymenoptera	Formicidae	Gnamptogenys	horni	Gnamptogenys horni (Santschi, 1929)	(Santschi, 1929)	Species	Ant	Fernandes, I.O. | Souza, J.L.P.	1	Individual
PreservedSpecimen	IlhaPedras:km0:2011:1	2017-09-13	Invertebrate Collection of INPA / Environmental monitoring of ants (Hymenoptera: Formicidae) in the influence areas of Santo Antônio Hydroelectric Power-Plant in Rondônia, Brazil		en	Instituto Nacional de Pesquisas da Amazônia (INPA)	INPA		Instituto Nacional de Pesquisas da Amazônia - INPA / Invertebrate Collection		BR:INPA:HYM:000178	Fernandes, I.O. | Souza, J.L.P.		female	adult	non-reprodutcive	alcohol	in collection / wet vial	Animalia	Arthropoda	Insecta	Hymenoptera	Formicidae	Gnamptogenys		Gnamptogenys Roger, 1863	Roger, 1863	Genus	Ant	Fernandes, I.O. | Souza, J.L.P.	1	Individual
PreservedSpecimen	IlhaPedras:km1:2011:1	2017-09-13	Invertebrate Collection of INPA / Environmental monitoring of ants (Hymenoptera: Formicidae) in the influence areas of Santo Antônio Hydroelectric Power-Plant in Rondônia, Brazil		en	Instituto Nacional de Pesquisas da Amazônia (INPA)	INPA		Instituto Nacional de Pesquisas da Amazônia - INPA / Invertebrate Collection		BR:INPA:HYM:000179	Fernandes, I.O. | Souza, J.L.P.		female	adult	non-reprodutcive	alcohol	in collection / wet vial	Animalia	Arthropoda	Insecta	Hymenoptera	Formicidae	Gnamptogenys		Gnamptogenys Roger, 1863	Roger, 1863	Genus	Ant	Fernandes, I.O. | Souza, J.L.P.	1	Individual
PreservedSpecimen	IlhaBúfalos:km2:2011:1	2017-09-13	Invertebrate Collection of INPA / Environmental monitoring of ants (Hymenoptera: Formicidae) in the influence areas of Santo Antônio Hydroelectric Power-Plant in Rondônia, Brazil		en	Instituto Nacional de Pesquisas da Amazônia (INPA)	INPA		Instituto Nacional de Pesquisas da Amazônia - INPA / Invertebrate Collection		BR:INPA:HYM:000180	Fernandes, I.O. | Souza, J.L.P.		female	adult	non-reprodutcive	alcohol	in collection / wet vial	Animalia	Arthropoda	Insecta	Hymenoptera	Formicidae	Gnamptogenys		Gnamptogenys Roger, 1863	Roger, 1863	Genus	Ant	Fernandes, I.O. | Souza, J.L.P.	1	Individual
PreservedSpecimen	Jaci-ParanáMD:Km2:2011:1	2017-09-13	Invertebrate Collection of INPA / Environmental monitoring of ants (Hymenoptera: Formicidae) in the influence areas of Santo Antônio Hydroelectric Power-Plant in Rondônia, Brazil		en	Instituto Nacional de Pesquisas da Amazônia (INPA)	INPA		Instituto Nacional de Pesquisas da Amazônia - INPA / Invertebrate Collection		BR:INPA:HYM:000181	Fernandes, I.O. | Souza, J.L.P.		female	adult	non-reprodutcive	alcohol	in collection / wet vial	Animalia	Arthropoda	Insecta	Hymenoptera	Formicidae	Gnamptogenys		Gnamptogenys Roger, 1863	Roger, 1863	Genus	Ant	Fernandes, I.O. | Souza, J.L.P.	1	Individual
PreservedSpecimen	IlhaPedras:km1:2011:1	2017-09-13	Invertebrate Collection of INPA / Environmental monitoring of ants (Hymenoptera: Formicidae) in the influence areas of Santo Antônio Hydroelectric Power-Plant in Rondônia, Brazil		en	Instituto Nacional de Pesquisas da Amazônia (INPA)	INPA		Instituto Nacional de Pesquisas da Amazônia - INPA / Invertebrate Collection		BR:INPA:HYM:000182	Fernandes, I.O. | Souza, J.L.P.		female	adult	non-reprodutcive	alcohol	in collection / wet vial	Animalia	Arthropoda	Insecta	Hymenoptera	Formicidae	Gnamptogenys	haenschi	Gnamptogenys haenschi (Emery, 1902)	(Emery, 1902)	Species	Ant	Fernandes, I.O. | Souza, J.L.P.	1	Individual
PreservedSpecimen	Morrinhos:Km0.5:2011:1	2017-09-13	Invertebrate Collection of INPA / Environmental monitoring of ants (Hymenoptera: Formicidae) in the influence areas of Santo Antônio Hydroelectric Power-Plant in Rondônia, Brazil		en	Instituto Nacional de Pesquisas da Amazônia (INPA)	INPA		Instituto Nacional de Pesquisas da Amazônia - INPA / Invertebrate Collection		BR:INPA:HYM:000183	Fernandes, I.O. | Souza, J.L.P.		female	adult	non-reprodutcive	alcohol	in collection / wet vial	Animalia	Arthropoda	Insecta	Hymenoptera	Formicidae	Gnamptogenys	tortuolosa	Gnamptogenys tortuolosa (Smith, 1858)	(Smith, 1858)	Species	Ant	Fernandes, I.O. | Souza, J.L.P.	1	Individual
PreservedSpecimen	Morrinhos:Km0:2011:1	2017-09-13	Invertebrate Collection of INPA / Environmental monitoring of ants (Hymenoptera: Formicidae) in the influence areas of Santo Antônio Hydroelectric Power-Plant in Rondônia, Brazil		en	Instituto Nacional de Pesquisas da Amazônia (INPA)	INPA		Instituto Nacional de Pesquisas da Amazônia - INPA / Invertebrate Collection		BR:INPA:HYM:000184	Fernandes, I.O. | Souza, J.L.P.		female	adult	non-reprodutcive	alcohol	in collection / wet vial	Animalia	Arthropoda	Insecta	Hymenoptera	Formicidae	Hylomyrma		Hylomyrma Forel, 1912	Forel, 1912	Genus	Ant	Fernandes, I.O. | Souza, J.L.P.	1	Individual
PreservedSpecimen	IlhaBúfalos:km0.5:2011:1	2017-09-13	Invertebrate Collection of INPA / Environmental monitoring of ants (Hymenoptera: Formicidae) in the influence areas of Santo Antônio Hydroelectric Power-Plant in Rondônia, Brazil		en	Instituto Nacional de Pesquisas da Amazônia (INPA)	INPA		Instituto Nacional de Pesquisas da Amazônia - INPA / Invertebrate Collection		BR:INPA:HYM:000185	Fernandes, I.O. | Souza, J.L.P.		female	adult	non-reprodutcive	alcohol	in collection / wet vial	Animalia	Arthropoda	Insecta	Hymenoptera	Formicidae	Hylomyrma		Hylomyrma Forel, 1912	Forel, 1912	Genus	Ant	Fernandes, I.O. | Souza, J.L.P.	1	Individual
PreservedSpecimen	IlhaBúfalos:km1:2011:1	2017-09-13	Invertebrate Collection of INPA / Environmental monitoring of ants (Hymenoptera: Formicidae) in the influence areas of Santo Antônio Hydroelectric Power-Plant in Rondônia, Brazil		en	Instituto Nacional de Pesquisas da Amazônia (INPA)	INPA		Instituto Nacional de Pesquisas da Amazônia - INPA / Invertebrate Collection		BR:INPA:HYM:000186	Fernandes, I.O. | Souza, J.L.P.		female	adult	non-reprodutcive	alcohol	in collection / wet vial	Animalia	Arthropoda	Insecta	Hymenoptera	Formicidae	Hylomyrma		Hylomyrma Forel, 1912	Forel, 1912	Genus	Ant	Fernandes, I.O. | Souza, J.L.P.	1	Individual
PreservedSpecimen	Morrinhos:Km1:2011:1	2017-09-13	Invertebrate Collection of INPA / Environmental monitoring of ants (Hymenoptera: Formicidae) in the influence areas of Santo Antônio Hydroelectric Power-Plant in Rondônia, Brazil		en	Instituto Nacional de Pesquisas da Amazônia (INPA)	INPA		Instituto Nacional de Pesquisas da Amazônia - INPA / Invertebrate Collection		BR:INPA:HYM:000187	Fernandes, I.O. | Souza, J.L.P.		female	adult	non-reprodutcive	alcohol	in collection / wet vial	Animalia	Arthropoda	Insecta	Hymenoptera	Formicidae	Hylomyrma		Hylomyrma Forel, 1912	Forel, 1912	Genus	Ant	Fernandes, I.O. | Souza, J.L.P.	1	Individual
PreservedSpecimen	Morrinhos:Km4:2011:1	2017-09-13	Invertebrate Collection of INPA / Environmental monitoring of ants (Hymenoptera: Formicidae) in the influence areas of Santo Antônio Hydroelectric Power-Plant in Rondônia, Brazil		en	Instituto Nacional de Pesquisas da Amazônia (INPA)	INPA		Instituto Nacional de Pesquisas da Amazônia - INPA / Invertebrate Collection		BR:INPA:HYM:000188	Fernandes, I.O. | Souza, J.L.P.		female	adult	non-reprodutcive	alcohol	in collection / wet vial	Animalia	Arthropoda	Insecta	Hymenoptera	Formicidae	Hylomyrma		Hylomyrma Forel, 1912	Forel, 1912	Genus	Ant	Fernandes, I.O. | Souza, J.L.P.	1	Individual
PreservedSpecimen	IlhaBúfalos:km1:2011:1	2017-09-13	Invertebrate Collection of INPA / Environmental monitoring of ants (Hymenoptera: Formicidae) in the influence areas of Santo Antônio Hydroelectric Power-Plant in Rondônia, Brazil		en	Instituto Nacional de Pesquisas da Amazônia (INPA)	INPA		Instituto Nacional de Pesquisas da Amazônia - INPA / Invertebrate Collection		BR:INPA:HYM:000189	Fernandes, I.O. | Souza, J.L.P.		female	adult	non-reprodutcive	alcohol	in collection / wet vial	Animalia	Arthropoda	Insecta	Hymenoptera	Formicidae	Hylomyrma		Hylomyrma Forel, 1912	Forel, 1912	Genus	Ant	Fernandes, I.O. | Souza, J.L.P.	1	Individual
PreservedSpecimen	IlhaBúfalos:km2:2011:1	2017-09-13	Invertebrate Collection of INPA / Environmental monitoring of ants (Hymenoptera: Formicidae) in the influence areas of Santo Antônio Hydroelectric Power-Plant in Rondônia, Brazil		en	Instituto Nacional de Pesquisas da Amazônia (INPA)	INPA		Instituto Nacional de Pesquisas da Amazônia - INPA / Invertebrate Collection		BR:INPA:HYM:000190	Fernandes, I.O. | Souza, J.L.P.		female	adult	non-reprodutcive	alcohol	in collection / wet vial	Animalia	Arthropoda	Insecta	Hymenoptera	Formicidae	Hylomyrma		Hylomyrma Forel, 1912	Forel, 1912	Genus	Ant	Fernandes, I.O. | Souza, J.L.P.	1	Individual
PreservedSpecimen	Morrinhos:Km3:2011:1	2017-09-13	Invertebrate Collection of INPA / Environmental monitoring of ants (Hymenoptera: Formicidae) in the influence areas of Santo Antônio Hydroelectric Power-Plant in Rondônia, Brazil		en	Instituto Nacional de Pesquisas da Amazônia (INPA)	INPA		Instituto Nacional de Pesquisas da Amazônia - INPA / Invertebrate Collection		BR:INPA:HYM:000191	Fernandes, I.O. | Souza, J.L.P.		female	adult	non-reprodutcive	alcohol	in collection / wet vial	Animalia	Arthropoda	Insecta	Hymenoptera	Formicidae	Hylomyrma		Hylomyrma Forel, 1912	Forel, 1912	Genus	Ant	Fernandes, I.O. | Souza, J.L.P.	1	Individual
PreservedSpecimen	Morrinhos:Km0:2011:1	2017-09-13	Invertebrate Collection of INPA / Environmental monitoring of ants (Hymenoptera: Formicidae) in the influence areas of Santo Antônio Hydroelectric Power-Plant in Rondônia, Brazil		en	Instituto Nacional de Pesquisas da Amazônia (INPA)	INPA		Instituto Nacional de Pesquisas da Amazônia - INPA / Invertebrate Collection		BR:INPA:HYM:000192	Fernandes, I.O. | Souza, J.L.P.		female	adult	non-reprodutcive	alcohol	in collection / wet vial	Animalia	Arthropoda	Insecta	Hymenoptera	Formicidae	Hylomyrma		Hylomyrma Forel, 1912	Forel, 1912	Genus	Ant	Fernandes, I.O. | Souza, J.L.P.	1	Individual
PreservedSpecimen	IlhaBúfalos:km1:2011:1	2017-09-13	Invertebrate Collection of INPA / Environmental monitoring of ants (Hymenoptera: Formicidae) in the influence areas of Santo Antônio Hydroelectric Power-Plant in Rondônia, Brazil		en	Instituto Nacional de Pesquisas da Amazônia (INPA)	INPA		Instituto Nacional de Pesquisas da Amazônia - INPA / Invertebrate Collection		BR:INPA:HYM:000193	Fernandes, I.O. | Souza, J.L.P.		female	adult	non-reprodutcive	alcohol	in collection / wet vial	Animalia	Arthropoda	Insecta	Hymenoptera	Formicidae	Hylomyrma		Hylomyrma Forel, 1912	Forel, 1912	Genus	Ant	Fernandes, I.O. | Souza, J.L.P.	1	Individual
PreservedSpecimen	Morrinhos:Km4:2011:1	2017-09-13	Invertebrate Collection of INPA / Environmental monitoring of ants (Hymenoptera: Formicidae) in the influence areas of Santo Antônio Hydroelectric Power-Plant in Rondônia, Brazil		en	Instituto Nacional de Pesquisas da Amazônia (INPA)	INPA		Instituto Nacional de Pesquisas da Amazônia - INPA / Invertebrate Collection		BR:INPA:HYM:000194	Fernandes, I.O. | Souza, J.L.P.		female	adult	non-reprodutcive	alcohol	in collection / wet vial	Animalia	Arthropoda	Insecta	Hymenoptera	Formicidae	Hylomyrma		Hylomyrma Forel, 1912	Forel, 1912	Genus	Ant	Fernandes, I.O. | Souza, J.L.P.	1	Individual
PreservedSpecimen	IlhaBúfalos:km0:2011:1	2017-09-13	Invertebrate Collection of INPA / Environmental monitoring of ants (Hymenoptera: Formicidae) in the influence areas of Santo Antônio Hydroelectric Power-Plant in Rondônia, Brazil		en	Instituto Nacional de Pesquisas da Amazônia (INPA)	INPA		Instituto Nacional de Pesquisas da Amazônia - INPA / Invertebrate Collection		BR:INPA:HYM:000195	Fernandes, I.O. | Souza, J.L.P.		female	adult	non-reprodutcive	alcohol	in collection / wet vial	Animalia	Arthropoda	Insecta	Hymenoptera	Formicidae	Hylomyrma		Hylomyrma Forel, 1912	Forel, 1912	Genus	Ant	Fernandes, I.O. | Souza, J.L.P.	1	Individual
PreservedSpecimen	IlhaBúfalos:km0.5:2011:1	2017-09-13	Invertebrate Collection of INPA / Environmental monitoring of ants (Hymenoptera: Formicidae) in the influence areas of Santo Antônio Hydroelectric Power-Plant in Rondônia, Brazil		en	Instituto Nacional de Pesquisas da Amazônia (INPA)	INPA		Instituto Nacional de Pesquisas da Amazônia - INPA / Invertebrate Collection		BR:INPA:HYM:000196	Fernandes, I.O. | Souza, J.L.P.		female	adult	non-reprodutcive	alcohol	in collection / wet vial	Animalia	Arthropoda	Insecta	Hymenoptera	Formicidae	Hylomyrma		Hylomyrma Forel, 1912	Forel, 1912	Genus	Ant	Fernandes, I.O. | Souza, J.L.P.	1	Individual
PreservedSpecimen	Morrinhos:Km0.5:2011:1	2017-09-13	Invertebrate Collection of INPA / Environmental monitoring of ants (Hymenoptera: Formicidae) in the influence areas of Santo Antônio Hydroelectric Power-Plant in Rondônia, Brazil		en	Instituto Nacional de Pesquisas da Amazônia (INPA)	INPA		Instituto Nacional de Pesquisas da Amazônia - INPA / Invertebrate Collection		BR:INPA:HYM:000197	Fernandes, I.O. | Souza, J.L.P.		female	adult	non-reprodutcive	alcohol	in collection / wet vial	Animalia	Arthropoda	Insecta	Hymenoptera	Formicidae	Hylomyrma		Hylomyrma Forel, 1912	Forel, 1912	Genus	Ant	Fernandes, I.O. | Souza, J.L.P.	1	Individual
PreservedSpecimen	IlhaPedras:km2:2011:1	2017-09-13	Invertebrate Collection of INPA / Environmental monitoring of ants (Hymenoptera: Formicidae) in the influence areas of Santo Antônio Hydroelectric Power-Plant in Rondônia, Brazil		en	Instituto Nacional de Pesquisas da Amazônia (INPA)	INPA		Instituto Nacional de Pesquisas da Amazônia - INPA / Invertebrate Collection		BR:INPA:HYM:000198	Fernandes, I.O. | Souza, J.L.P.		female	adult	non-reprodutcive	alcohol	in collection / wet vial	Animalia	Arthropoda	Insecta	Hymenoptera	Formicidae	Hylomyrma		Hylomyrma Forel, 1912	Forel, 1912	Genus	Ant	Fernandes, I.O. | Souza, J.L.P.	1	Individual
PreservedSpecimen	Morrinhos:Km4:2011:1	2017-09-13	Invertebrate Collection of INPA / Environmental monitoring of ants (Hymenoptera: Formicidae) in the influence areas of Santo Antônio Hydroelectric Power-Plant in Rondônia, Brazil		en	Instituto Nacional de Pesquisas da Amazônia (INPA)	INPA		Instituto Nacional de Pesquisas da Amazônia - INPA / Invertebrate Collection		BR:INPA:HYM:000199	Fernandes, I.O. | Souza, J.L.P.		female	adult	non-reprodutcive	alcohol	in collection / wet vial	Animalia	Arthropoda	Insecta	Hymenoptera	Formicidae	Hylomyrma		Hylomyrma Forel, 1912	Forel, 1912	Genus	Ant	Fernandes, I.O. | Souza, J.L.P.	1	Individual
PreservedSpecimen	IlhaBúfalos:km0.5:2011:1	2017-09-13	Invertebrate Collection of INPA / Environmental monitoring of ants (Hymenoptera: Formicidae) in the influence areas of Santo Antônio Hydroelectric Power-Plant in Rondônia, Brazil		en	Instituto Nacional de Pesquisas da Amazônia (INPA)	INPA		Instituto Nacional de Pesquisas da Amazônia - INPA / Invertebrate Collection		BR:INPA:HYM:000200	Fernandes, I.O. | Souza, J.L.P.		female	adult	non-reprodutcive	alcohol	in collection / wet vial	Animalia	Arthropoda	Insecta	Hymenoptera	Formicidae	Hylomyrma		Hylomyrma Forel, 1912	Forel, 1912	Genus	Ant	Fernandes, I.O. | Souza, J.L.P.	1	Individual
PreservedSpecimen	Morrinhos:Km1:2011:1	2017-09-13	Invertebrate Collection of INPA / Environmental monitoring of ants (Hymenoptera: Formicidae) in the influence areas of Santo Antônio Hydroelectric Power-Plant in Rondônia, Brazil		en	Instituto Nacional de Pesquisas da Amazônia (INPA)	INPA		Instituto Nacional de Pesquisas da Amazônia - INPA / Invertebrate Collection		BR:INPA:HYM:000201	Fernandes, I.O. | Souza, J.L.P.		female	adult	non-reprodutcive	alcohol	in collection / wet vial	Animalia	Arthropoda	Insecta	Hymenoptera	Formicidae	Hylomyrma		Hylomyrma Forel, 1912	Forel, 1912	Genus	Ant	Fernandes, I.O. | Souza, J.L.P.	1	Individual
PreservedSpecimen	IlhaBúfalos:km3:2011:1	2017-09-13	Invertebrate Collection of INPA / Environmental monitoring of ants (Hymenoptera: Formicidae) in the influence areas of Santo Antônio Hydroelectric Power-Plant in Rondônia, Brazil		en	Instituto Nacional de Pesquisas da Amazônia (INPA)	INPA		Instituto Nacional de Pesquisas da Amazônia - INPA / Invertebrate Collection		BR:INPA:HYM:000202	Fernandes, I.O. | Souza, J.L.P.		female	adult	non-reprodutcive	alcohol	in collection / wet vial	Animalia	Arthropoda	Insecta	Hymenoptera	Formicidae	Hylomyrma		Hylomyrma Forel, 1912	Forel, 1912	Genus	Ant	Fernandes, I.O. | Souza, J.L.P.	1	Individual
PreservedSpecimen	IlhaPedras:km2:2011:1	2017-09-13	Invertebrate Collection of INPA / Environmental monitoring of ants (Hymenoptera: Formicidae) in the influence areas of Santo Antônio Hydroelectric Power-Plant in Rondônia, Brazil		en	Instituto Nacional de Pesquisas da Amazônia (INPA)	INPA		Instituto Nacional de Pesquisas da Amazônia - INPA / Invertebrate Collection		BR:INPA:HYM:000203	Fernandes, I.O. | Souza, J.L.P.		female	adult	non-reprodutcive	alcohol	in collection / wet vial	Animalia	Arthropoda	Insecta	Hymenoptera	Formicidae	Hylomyrma		Hylomyrma Forel, 1912	Forel, 1912	Genus	Ant	Fernandes, I.O. | Souza, J.L.P.	1	Individual
PreservedSpecimen	IlhaPedras:km2:2011:1	2017-09-13	Invertebrate Collection of INPA / Environmental monitoring of ants (Hymenoptera: Formicidae) in the influence areas of Santo Antônio Hydroelectric Power-Plant in Rondônia, Brazil		en	Instituto Nacional de Pesquisas da Amazônia (INPA)	INPA		Instituto Nacional de Pesquisas da Amazônia - INPA / Invertebrate Collection		BR:INPA:HYM:000204	Fernandes, I.O. | Souza, J.L.P.		female	adult	non-reprodutcive	alcohol	in collection / wet vial	Animalia	Arthropoda	Insecta	Hymenoptera	Formicidae	Hylomyrma		Hylomyrma Forel, 1912	Forel, 1912	Genus	Ant	Fernandes, I.O. | Souza, J.L.P.	1	Individual
PreservedSpecimen	Jaci-ParanáMD:Km3:2011:1	2017-09-13	Invertebrate Collection of INPA / Environmental monitoring of ants (Hymenoptera: Formicidae) in the influence areas of Santo Antônio Hydroelectric Power-Plant in Rondônia, Brazil		en	Instituto Nacional de Pesquisas da Amazônia (INPA)	INPA		Instituto Nacional de Pesquisas da Amazônia - INPA / Invertebrate Collection		BR:INPA:HYM:000205	Fernandes, I.O. | Souza, J.L.P.		female	adult	non-reprodutcive	alcohol	in collection / wet vial	Animalia	Arthropoda	Insecta	Hymenoptera	Formicidae	Hypoponera		Hypoponera Santschi, 1938	Santschi, 1938	Genus	Ant	Fernandes, I.O. | Souza, J.L.P.	1	Individual
PreservedSpecimen	Jaci-ParanáMD:Km2:2011:1	2017-09-13	Invertebrate Collection of INPA / Environmental monitoring of ants (Hymenoptera: Formicidae) in the influence areas of Santo Antônio Hydroelectric Power-Plant in Rondônia, Brazil		en	Instituto Nacional de Pesquisas da Amazônia (INPA)	INPA		Instituto Nacional de Pesquisas da Amazônia - INPA / Invertebrate Collection		BR:INPA:HYM:000206	Fernandes, I.O. | Souza, J.L.P.		female	adult	non-reprodutcive	alcohol	in collection / wet vial	Animalia	Arthropoda	Insecta	Hymenoptera	Formicidae	Hypoponera		Hypoponera Santschi, 1938	Santschi, 1938	Genus	Ant	Fernandes, I.O. | Souza, J.L.P.	1	Individual
PreservedSpecimen	Jaci-ParanáMD:Km3:2011:1	2017-09-13	Invertebrate Collection of INPA / Environmental monitoring of ants (Hymenoptera: Formicidae) in the influence areas of Santo Antônio Hydroelectric Power-Plant in Rondônia, Brazil		en	Instituto Nacional de Pesquisas da Amazônia (INPA)	INPA		Instituto Nacional de Pesquisas da Amazônia - INPA / Invertebrate Collection		BR:INPA:HYM:000207	Fernandes, I.O. | Souza, J.L.P.		female	adult	non-reprodutcive	alcohol	in collection / wet vial	Animalia	Arthropoda	Insecta	Hymenoptera	Formicidae	Hypoponera		Hypoponera Santschi, 1938	Santschi, 1938	Genus	Ant	Fernandes, I.O. | Souza, J.L.P.	1	Individual
PreservedSpecimen	IlhaBúfalos:km0.5:2011:1	2017-09-13	Invertebrate Collection of INPA / Environmental monitoring of ants (Hymenoptera: Formicidae) in the influence areas of Santo Antônio Hydroelectric Power-Plant in Rondônia, Brazil		en	Instituto Nacional de Pesquisas da Amazônia (INPA)	INPA		Instituto Nacional de Pesquisas da Amazônia - INPA / Invertebrate Collection		BR:INPA:HYM:000208	Fernandes, I.O. | Souza, J.L.P.		female	adult	non-reprodutcive	alcohol	in collection / wet vial	Animalia	Arthropoda	Insecta	Hymenoptera	Formicidae	Hypoponera		Hypoponera Santschi, 1938	Santschi, 1938	Genus	Ant	Fernandes, I.O. | Souza, J.L.P.	1	Individual
PreservedSpecimen	Morrinhos:Km0.5:2011:1	2017-09-13	Invertebrate Collection of INPA / Environmental monitoring of ants (Hymenoptera: Formicidae) in the influence areas of Santo Antônio Hydroelectric Power-Plant in Rondônia, Brazil		en	Instituto Nacional de Pesquisas da Amazônia (INPA)	INPA		Instituto Nacional de Pesquisas da Amazônia - INPA / Invertebrate Collection		BR:INPA:HYM:000209	Fernandes, I.O. | Souza, J.L.P.		female	adult	non-reprodutcive	alcohol	in collection / wet vial	Animalia	Arthropoda	Insecta	Hymenoptera	Formicidae	Hypoponera		Hypoponera Santschi, 1938	Santschi, 1938	Genus	Ant	Fernandes, I.O. | Souza, J.L.P.	1	Individual
PreservedSpecimen	IlhaBúfalos:km1:2011:1	2017-09-13	Invertebrate Collection of INPA / Environmental monitoring of ants (Hymenoptera: Formicidae) in the influence areas of Santo Antônio Hydroelectric Power-Plant in Rondônia, Brazil		en	Instituto Nacional de Pesquisas da Amazônia (INPA)	INPA		Instituto Nacional de Pesquisas da Amazônia - INPA / Invertebrate Collection		BR:INPA:HYM:000210	Fernandes, I.O. | Souza, J.L.P.		female	adult	non-reprodutcive	alcohol	in collection / wet vial	Animalia	Arthropoda	Insecta	Hymenoptera	Formicidae	Hypoponera		Hypoponera Santschi, 1938	Santschi, 1938	Genus	Ant	Fernandes, I.O. | Souza, J.L.P.	1	Individual
PreservedSpecimen	IlhaPedras:km1:2011:1	2017-09-13	Invertebrate Collection of INPA / Environmental monitoring of ants (Hymenoptera: Formicidae) in the influence areas of Santo Antônio Hydroelectric Power-Plant in Rondônia, Brazil		en	Instituto Nacional de Pesquisas da Amazônia (INPA)	INPA		Instituto Nacional de Pesquisas da Amazônia - INPA / Invertebrate Collection		BR:INPA:HYM:000211	Fernandes, I.O. | Souza, J.L.P.		female	adult	non-reprodutcive	alcohol	in collection / wet vial	Animalia	Arthropoda	Insecta	Hymenoptera	Formicidae	Hypoponera		Hypoponera Santschi, 1938	Santschi, 1938	Genus	Ant	Fernandes, I.O. | Souza, J.L.P.	1	Individual
PreservedSpecimen	Jaci-ParanáMD:Km1:2011:1	2017-09-13	Invertebrate Collection of INPA / Environmental monitoring of ants (Hymenoptera: Formicidae) in the influence areas of Santo Antônio Hydroelectric Power-Plant in Rondônia, Brazil		en	Instituto Nacional de Pesquisas da Amazônia (INPA)	INPA		Instituto Nacional de Pesquisas da Amazônia - INPA / Invertebrate Collection		BR:INPA:HYM:000212	Fernandes, I.O. | Souza, J.L.P.		female	adult	non-reprodutcive	alcohol	in collection / wet vial	Animalia	Arthropoda	Insecta	Hymenoptera	Formicidae	Hypoponera		Hypoponera Santschi, 1938	Santschi, 1938	Genus	Ant	Fernandes, I.O. | Souza, J.L.P.	1	Individual
PreservedSpecimen	IlhaBúfalos:km4:2011:1	2017-09-13	Invertebrate Collection of INPA / Environmental monitoring of ants (Hymenoptera: Formicidae) in the influence areas of Santo Antônio Hydroelectric Power-Plant in Rondônia, Brazil		en	Instituto Nacional de Pesquisas da Amazônia (INPA)	INPA		Instituto Nacional de Pesquisas da Amazônia - INPA / Invertebrate Collection		BR:INPA:HYM:000213	Fernandes, I.O. | Souza, J.L.P.		female	adult	non-reprodutcive	alcohol	in collection / wet vial	Animalia	Arthropoda	Insecta	Hymenoptera	Formicidae	Hypoponera		Hypoponera Santschi, 1938	Santschi, 1938	Genus	Ant	Fernandes, I.O. | Souza, J.L.P.	1	Individual
PreservedSpecimen	IlhaBúfalos:km0.5:2011:1	2017-09-13	Invertebrate Collection of INPA / Environmental monitoring of ants (Hymenoptera: Formicidae) in the influence areas of Santo Antônio Hydroelectric Power-Plant in Rondônia, Brazil		en	Instituto Nacional de Pesquisas da Amazônia (INPA)	INPA		Instituto Nacional de Pesquisas da Amazônia - INPA / Invertebrate Collection		BR:INPA:HYM:000214	Fernandes, I.O. | Souza, J.L.P.		female	adult	non-reprodutcive	alcohol	in collection / wet vial	Animalia	Arthropoda	Insecta	Hymenoptera	Formicidae	Hypoponera		Hypoponera Santschi, 1938	Santschi, 1938	Genus	Ant	Fernandes, I.O. | Souza, J.L.P.	1	Individual
PreservedSpecimen	IlhaBúfalos:km2:2011:1	2017-09-13	Invertebrate Collection of INPA / Environmental monitoring of ants (Hymenoptera: Formicidae) in the influence areas of Santo Antônio Hydroelectric Power-Plant in Rondônia, Brazil		en	Instituto Nacional de Pesquisas da Amazônia (INPA)	INPA		Instituto Nacional de Pesquisas da Amazônia - INPA / Invertebrate Collection		BR:INPA:HYM:000215	Fernandes, I.O. | Souza, J.L.P.		female	adult	non-reprodutcive	alcohol	in collection / wet vial	Animalia	Arthropoda	Insecta	Hymenoptera	Formicidae	Hypoponera		Hypoponera Santschi, 1938	Santschi, 1938	Genus	Ant	Fernandes, I.O. | Souza, J.L.P.	1	Individual
PreservedSpecimen	IlhaPedras:km2:2011:1	2017-09-13	Invertebrate Collection of INPA / Environmental monitoring of ants (Hymenoptera: Formicidae) in the influence areas of Santo Antônio Hydroelectric Power-Plant in Rondônia, Brazil		en	Instituto Nacional de Pesquisas da Amazônia (INPA)	INPA		Instituto Nacional de Pesquisas da Amazônia - INPA / Invertebrate Collection		BR:INPA:HYM:000216	Fernandes, I.O. | Souza, J.L.P.		female	adult	non-reprodutcive	alcohol	in collection / wet vial	Animalia	Arthropoda	Insecta	Hymenoptera	Formicidae	Hypoponera		Hypoponera Santschi, 1938	Santschi, 1938	Genus	Ant	Fernandes, I.O. | Souza, J.L.P.	1	Individual
PreservedSpecimen	IlhaPedras:km0:2011:1	2017-09-13	Invertebrate Collection of INPA / Environmental monitoring of ants (Hymenoptera: Formicidae) in the influence areas of Santo Antônio Hydroelectric Power-Plant in Rondônia, Brazil		en	Instituto Nacional de Pesquisas da Amazônia (INPA)	INPA		Instituto Nacional de Pesquisas da Amazônia - INPA / Invertebrate Collection		BR:INPA:HYM:000217	Fernandes, I.O. | Souza, J.L.P.		female	adult	non-reprodutcive	alcohol	in collection / wet vial	Animalia	Arthropoda	Insecta	Hymenoptera	Formicidae	Hypoponera		Hypoponera Santschi, 1938	Santschi, 1938	Genus	Ant	Fernandes, I.O. | Souza, J.L.P.	1	Individual
PreservedSpecimen	IlhaBúfalos:km0.5:2011:1	2017-09-13	Invertebrate Collection of INPA / Environmental monitoring of ants (Hymenoptera: Formicidae) in the influence areas of Santo Antônio Hydroelectric Power-Plant in Rondônia, Brazil		en	Instituto Nacional de Pesquisas da Amazônia (INPA)	INPA		Instituto Nacional de Pesquisas da Amazônia - INPA / Invertebrate Collection		BR:INPA:HYM:000218	Fernandes, I.O. | Souza, J.L.P.		female	adult	non-reprodutcive	alcohol	in collection / wet vial	Animalia	Arthropoda	Insecta	Hymenoptera	Formicidae	Hypoponera		Hypoponera Santschi, 1938	Santschi, 1938	Genus	Ant	Fernandes, I.O. | Souza, J.L.P.	1	Individual
PreservedSpecimen	IlhaBúfalos:Km1:2011:2	2017-09-13	Invertebrate Collection of INPA / Environmental monitoring of ants (Hymenoptera: Formicidae) in the influence areas of Santo Antônio Hydroelectric Power-Plant in Rondônia, Brazil		en	Instituto Nacional de Pesquisas da Amazônia (INPA)	INPA		Instituto Nacional de Pesquisas da Amazônia - INPA / Invertebrate Collection		BR:INPA:HYM:000219	Fernandes, I.O. | Souza, J.L.P.		female	adult	non-reprodutcive	alcohol	in collection / wet vial	Animalia	Arthropoda	Insecta	Hymenoptera	Formicidae	Hypoponera		Hypoponera Santschi, 1938	Santschi, 1938	Genus	Ant	Fernandes, I.O. | Souza, J.L.P.	1	Individual
PreservedSpecimen	Jaci-ParanáMD:Km1:2011:1	2017-09-13	Invertebrate Collection of INPA / Environmental monitoring of ants (Hymenoptera: Formicidae) in the influence areas of Santo Antônio Hydroelectric Power-Plant in Rondônia, Brazil		en	Instituto Nacional de Pesquisas da Amazônia (INPA)	INPA		Instituto Nacional de Pesquisas da Amazônia - INPA / Invertebrate Collection		BR:INPA:HYM:000220	Fernandes, I.O. | Souza, J.L.P.		female	adult	non-reprodutcive	alcohol	in collection / wet vial	Animalia	Arthropoda	Insecta	Hymenoptera	Formicidae	Hypoponera		Hypoponera Santschi, 1938	Santschi, 1938	Genus	Ant	Fernandes, I.O. | Souza, J.L.P.	1	Individual
PreservedSpecimen	IlhaBúfalos:km3:2011:1	2017-09-13	Invertebrate Collection of INPA / Environmental monitoring of ants (Hymenoptera: Formicidae) in the influence areas of Santo Antônio Hydroelectric Power-Plant in Rondônia, Brazil		en	Instituto Nacional de Pesquisas da Amazônia (INPA)	INPA		Instituto Nacional de Pesquisas da Amazônia - INPA / Invertebrate Collection		BR:INPA:HYM:000221	Fernandes, I.O. | Souza, J.L.P.		female	adult	non-reprodutcive	alcohol	in collection / wet vial	Animalia	Arthropoda	Insecta	Hymenoptera	Formicidae	Hypoponera		Hypoponera Santschi, 1938	Santschi, 1938	Genus	Ant	Fernandes, I.O. | Souza, J.L.P.	1	Individual
PreservedSpecimen	IlhaBúfalos:km4:2011:1	2017-09-13	Invertebrate Collection of INPA / Environmental monitoring of ants (Hymenoptera: Formicidae) in the influence areas of Santo Antônio Hydroelectric Power-Plant in Rondônia, Brazil		en	Instituto Nacional de Pesquisas da Amazônia (INPA)	INPA		Instituto Nacional de Pesquisas da Amazônia - INPA / Invertebrate Collection		BR:INPA:HYM:000222	Fernandes, I.O. | Souza, J.L.P.		female	adult	non-reprodutcive	alcohol	in collection / wet vial	Animalia	Arthropoda	Insecta	Hymenoptera	Formicidae	Hypoponera		Hypoponera Santschi, 1938	Santschi, 1938	Genus	Ant	Fernandes, I.O. | Souza, J.L.P.	1	Individual
PreservedSpecimen	IlhaBúfalos:km0:2011:1	2017-09-13	Invertebrate Collection of INPA / Environmental monitoring of ants (Hymenoptera: Formicidae) in the influence areas of Santo Antônio Hydroelectric Power-Plant in Rondônia, Brazil		en	Instituto Nacional de Pesquisas da Amazônia (INPA)	INPA		Instituto Nacional de Pesquisas da Amazônia - INPA / Invertebrate Collection		BR:INPA:HYM:000223	Fernandes, I.O. | Souza, J.L.P.		female	adult	non-reprodutcive	alcohol	in collection / wet vial	Animalia	Arthropoda	Insecta	Hymenoptera	Formicidae	Hypoponera		Hypoponera Santschi, 1938	Santschi, 1938	Genus	Ant	Fernandes, I.O. | Souza, J.L.P.	1	Individual
PreservedSpecimen	IlhaBúfalos:km1:2011:1	2017-09-13	Invertebrate Collection of INPA / Environmental monitoring of ants (Hymenoptera: Formicidae) in the influence areas of Santo Antônio Hydroelectric Power-Plant in Rondônia, Brazil		en	Instituto Nacional de Pesquisas da Amazônia (INPA)	INPA		Instituto Nacional de Pesquisas da Amazônia - INPA / Invertebrate Collection		BR:INPA:HYM:000224	Fernandes, I.O. | Souza, J.L.P.		female	adult	non-reprodutcive	alcohol	in collection / wet vial	Animalia	Arthropoda	Insecta	Hymenoptera	Formicidae	Hypoponera		Hypoponera Santschi, 1938	Santschi, 1938	Genus	Ant	Fernandes, I.O. | Souza, J.L.P.	1	Individual
PreservedSpecimen	Jaci-ParanáMD:Km1:2011:1	2017-09-13	Invertebrate Collection of INPA / Environmental monitoring of ants (Hymenoptera: Formicidae) in the influence areas of Santo Antônio Hydroelectric Power-Plant in Rondônia, Brazil		en	Instituto Nacional de Pesquisas da Amazônia (INPA)	INPA		Instituto Nacional de Pesquisas da Amazônia - INPA / Invertebrate Collection		BR:INPA:HYM:000225	Fernandes, I.O. | Souza, J.L.P.		female	adult	non-reprodutcive	alcohol	in collection / wet vial	Animalia	Arthropoda	Insecta	Hymenoptera	Formicidae	Hypoponera		Hypoponera Santschi, 1938	Santschi, 1938	Genus	Ant	Fernandes, I.O. | Souza, J.L.P.	1	Individual
PreservedSpecimen	IlhaPedras:km2:2011:1	2017-09-13	Invertebrate Collection of INPA / Environmental monitoring of ants (Hymenoptera: Formicidae) in the influence areas of Santo Antônio Hydroelectric Power-Plant in Rondônia, Brazil		en	Instituto Nacional de Pesquisas da Amazônia (INPA)	INPA		Instituto Nacional de Pesquisas da Amazônia - INPA / Invertebrate Collection		BR:INPA:HYM:000226	Fernandes, I.O. | Souza, J.L.P.		female	adult	non-reprodutcive	alcohol	in collection / wet vial	Animalia	Arthropoda	Insecta	Hymenoptera	Formicidae	Hypoponera		Hypoponera Santschi, 1938	Santschi, 1938	Genus	Ant	Fernandes, I.O. | Souza, J.L.P.	1	Individual
PreservedSpecimen	IlhaBúfalos:km4:2011:1	2017-09-13	Invertebrate Collection of INPA / Environmental monitoring of ants (Hymenoptera: Formicidae) in the influence areas of Santo Antônio Hydroelectric Power-Plant in Rondônia, Brazil		en	Instituto Nacional de Pesquisas da Amazônia (INPA)	INPA		Instituto Nacional de Pesquisas da Amazônia - INPA / Invertebrate Collection		BR:INPA:HYM:000227	Fernandes, I.O. | Souza, J.L.P.		female	adult	non-reprodutcive	alcohol	in collection / wet vial	Animalia	Arthropoda	Insecta	Hymenoptera	Formicidae	Hypoponera		Hypoponera Santschi, 1938	Santschi, 1938	Genus	Ant	Fernandes, I.O. | Souza, J.L.P.	1	Individual
PreservedSpecimen	IlhaBúfalos:km0.5:2011:1	2017-09-13	Invertebrate Collection of INPA / Environmental monitoring of ants (Hymenoptera: Formicidae) in the influence areas of Santo Antônio Hydroelectric Power-Plant in Rondônia, Brazil		en	Instituto Nacional de Pesquisas da Amazônia (INPA)	INPA		Instituto Nacional de Pesquisas da Amazônia - INPA / Invertebrate Collection		BR:INPA:HYM:000228	Fernandes, I.O. | Souza, J.L.P.		female	adult	non-reprodutcive	alcohol	in collection / wet vial	Animalia	Arthropoda	Insecta	Hymenoptera	Formicidae	Hypoponera		Hypoponera Santschi, 1938	Santschi, 1938	Genus	Ant	Fernandes, I.O. | Souza, J.L.P.	1	Individual
PreservedSpecimen	Jaci-ParanáMD:Km0.5:2011:1	2017-09-13	Invertebrate Collection of INPA / Environmental monitoring of ants (Hymenoptera: Formicidae) in the influence areas of Santo Antônio Hydroelectric Power-Plant in Rondônia, Brazil		en	Instituto Nacional de Pesquisas da Amazônia (INPA)	INPA		Instituto Nacional de Pesquisas da Amazônia - INPA / Invertebrate Collection		BR:INPA:HYM:000229	Fernandes, I.O. | Souza, J.L.P.		female	adult	non-reprodutcive	alcohol	in collection / wet vial	Animalia	Arthropoda	Insecta	Hymenoptera	Formicidae	Hypoponera		Hypoponera Santschi, 1938	Santschi, 1938	Genus	Ant	Fernandes, I.O. | Souza, J.L.P.	1	Individual
PreservedSpecimen	IlhaBúfalos:km1:2011:1	2017-09-13	Invertebrate Collection of INPA / Environmental monitoring of ants (Hymenoptera: Formicidae) in the influence areas of Santo Antônio Hydroelectric Power-Plant in Rondônia, Brazil		en	Instituto Nacional de Pesquisas da Amazônia (INPA)	INPA		Instituto Nacional de Pesquisas da Amazônia - INPA / Invertebrate Collection		BR:INPA:HYM:000230	Fernandes, I.O. | Souza, J.L.P.		female	adult	non-reprodutcive	alcohol	in collection / wet vial	Animalia	Arthropoda	Insecta	Hymenoptera	Formicidae	Hypoponera		Hypoponera Santschi, 1938	Santschi, 1938	Genus	Ant	Fernandes, I.O. | Souza, J.L.P.	1	Individual
PreservedSpecimen	Morrinhos:Km2:2011:1	2017-09-13	Invertebrate Collection of INPA / Environmental monitoring of ants (Hymenoptera: Formicidae) in the influence areas of Santo Antônio Hydroelectric Power-Plant in Rondônia, Brazil		en	Instituto Nacional de Pesquisas da Amazônia (INPA)	INPA		Instituto Nacional de Pesquisas da Amazônia - INPA / Invertebrate Collection		BR:INPA:HYM:000231	Fernandes, I.O. | Souza, J.L.P.		female	adult	non-reprodutcive	alcohol	in collection / wet vial	Animalia	Arthropoda	Insecta	Hymenoptera	Formicidae	Hypoponera		Hypoponera Santschi, 1938	Santschi, 1938	Genus	Ant	Fernandes, I.O. | Souza, J.L.P.	1	Individual
PreservedSpecimen	IlhaBúfalos:km4:2011:1	2017-09-13	Invertebrate Collection of INPA / Environmental monitoring of ants (Hymenoptera: Formicidae) in the influence areas of Santo Antônio Hydroelectric Power-Plant in Rondônia, Brazil		en	Instituto Nacional de Pesquisas da Amazônia (INPA)	INPA		Instituto Nacional de Pesquisas da Amazônia - INPA / Invertebrate Collection		BR:INPA:HYM:000232	Fernandes, I.O. | Souza, J.L.P.		female	adult	non-reprodutcive	alcohol	in collection / wet vial	Animalia	Arthropoda	Insecta	Hymenoptera	Formicidae	Hypoponera		Hypoponera Santschi, 1938	Santschi, 1938	Genus	Ant	Fernandes, I.O. | Souza, J.L.P.	1	Individual
PreservedSpecimen	IlhaPedras:km4:2011:1	2017-09-13	Invertebrate Collection of INPA / Environmental monitoring of ants (Hymenoptera: Formicidae) in the influence areas of Santo Antônio Hydroelectric Power-Plant in Rondônia, Brazil		en	Instituto Nacional de Pesquisas da Amazônia (INPA)	INPA		Instituto Nacional de Pesquisas da Amazônia - INPA / Invertebrate Collection		BR:INPA:HYM:000233	Fernandes, I.O. | Souza, J.L.P.		female	adult	non-reprodutcive	alcohol	in collection / wet vial	Animalia	Arthropoda	Insecta	Hymenoptera	Formicidae	Hypoponera		Hypoponera Santschi, 1938	Santschi, 1938	Genus	Ant	Fernandes, I.O. | Souza, J.L.P.	1	Individual
PreservedSpecimen	Jaci-ParanáMD:Km4:2011:1	2017-09-13	Invertebrate Collection of INPA / Environmental monitoring of ants (Hymenoptera: Formicidae) in the influence areas of Santo Antônio Hydroelectric Power-Plant in Rondônia, Brazil		en	Instituto Nacional de Pesquisas da Amazônia (INPA)	INPA		Instituto Nacional de Pesquisas da Amazônia - INPA / Invertebrate Collection		BR:INPA:HYM:000234	Fernandes, I.O. | Souza, J.L.P.		female	adult	non-reprodutcive	alcohol	in collection / wet vial	Animalia	Arthropoda	Insecta	Hymenoptera	Formicidae	Hypoponera		Hypoponera Santschi, 1938	Santschi, 1938	Genus	Ant	Fernandes, I.O. | Souza, J.L.P.	1	Individual
PreservedSpecimen	Jaci-ParanáMD:Km4:2011:1	2017-09-13	Invertebrate Collection of INPA / Environmental monitoring of ants (Hymenoptera: Formicidae) in the influence areas of Santo Antônio Hydroelectric Power-Plant in Rondônia, Brazil		en	Instituto Nacional de Pesquisas da Amazônia (INPA)	INPA		Instituto Nacional de Pesquisas da Amazônia - INPA / Invertebrate Collection		BR:INPA:HYM:000235	Fernandes, I.O. | Souza, J.L.P.		female	adult	non-reprodutcive	alcohol	in collection / wet vial	Animalia	Arthropoda	Insecta	Hymenoptera	Formicidae	Hypoponera		Hypoponera Santschi, 1938	Santschi, 1938	Genus	Ant	Fernandes, I.O. | Souza, J.L.P.	1	Individual
PreservedSpecimen	Jaci-ParanáMD:Km3:2011:1	2017-09-13	Invertebrate Collection of INPA / Environmental monitoring of ants (Hymenoptera: Formicidae) in the influence areas of Santo Antônio Hydroelectric Power-Plant in Rondônia, Brazil		en	Instituto Nacional de Pesquisas da Amazônia (INPA)	INPA		Instituto Nacional de Pesquisas da Amazônia - INPA / Invertebrate Collection		BR:INPA:HYM:000236	Fernandes, I.O. | Souza, J.L.P.		female	adult	non-reprodutcive	alcohol	in collection / wet vial	Animalia	Arthropoda	Insecta	Hymenoptera	Formicidae	Hypoponera		Hypoponera Santschi, 1938	Santschi, 1938	Genus	Ant	Fernandes, I.O. | Souza, J.L.P.	1	Individual
PreservedSpecimen	IlhaBúfalos:km1:2011:1	2017-09-13	Invertebrate Collection of INPA / Environmental monitoring of ants (Hymenoptera: Formicidae) in the influence areas of Santo Antônio Hydroelectric Power-Plant in Rondônia, Brazil		en	Instituto Nacional de Pesquisas da Amazônia (INPA)	INPA		Instituto Nacional de Pesquisas da Amazônia - INPA / Invertebrate Collection		BR:INPA:HYM:000237	Fernandes, I.O. | Souza, J.L.P.		female	adult	non-reprodutcive	alcohol	in collection / wet vial	Animalia	Arthropoda	Insecta	Hymenoptera	Formicidae	Hypoponera		Hypoponera Santschi, 1938	Santschi, 1938	Genus	Ant	Fernandes, I.O. | Souza, J.L.P.	1	Individual
PreservedSpecimen	Jaci-ParanáMD:Km1:2011:1	2017-09-13	Invertebrate Collection of INPA / Environmental monitoring of ants (Hymenoptera: Formicidae) in the influence areas of Santo Antônio Hydroelectric Power-Plant in Rondônia, Brazil		en	Instituto Nacional de Pesquisas da Amazônia (INPA)	INPA		Instituto Nacional de Pesquisas da Amazônia - INPA / Invertebrate Collection		BR:INPA:HYM:000238	Fernandes, I.O. | Souza, J.L.P.		female	adult	non-reprodutcive	alcohol	in collection / wet vial	Animalia	Arthropoda	Insecta	Hymenoptera	Formicidae	Hypoponera		Hypoponera Santschi, 1938	Santschi, 1938	Genus	Ant	Fernandes, I.O. | Souza, J.L.P.	1	Individual
PreservedSpecimen	IlhaBúfalos:km4:2011:1	2017-09-13	Invertebrate Collection of INPA / Environmental monitoring of ants (Hymenoptera: Formicidae) in the influence areas of Santo Antônio Hydroelectric Power-Plant in Rondônia, Brazil		en	Instituto Nacional de Pesquisas da Amazônia (INPA)	INPA		Instituto Nacional de Pesquisas da Amazônia - INPA / Invertebrate Collection		BR:INPA:HYM:000239	Fernandes, I.O. | Souza, J.L.P.		female	adult	non-reprodutcive	alcohol	in collection / wet vial	Animalia	Arthropoda	Insecta	Hymenoptera	Formicidae	Hypoponera		Hypoponera Santschi, 1938	Santschi, 1938	Genus	Ant	Fernandes, I.O. | Souza, J.L.P.	1	Individual
PreservedSpecimen	IlhaPedras:km2:2011:1	2017-09-13	Invertebrate Collection of INPA / Environmental monitoring of ants (Hymenoptera: Formicidae) in the influence areas of Santo Antônio Hydroelectric Power-Plant in Rondônia, Brazil		en	Instituto Nacional de Pesquisas da Amazônia (INPA)	INPA		Instituto Nacional de Pesquisas da Amazônia - INPA / Invertebrate Collection		BR:INPA:HYM:000240	Fernandes, I.O. | Souza, J.L.P.		female	adult	non-reprodutcive	alcohol	in collection / wet vial	Animalia	Arthropoda	Insecta	Hymenoptera	Formicidae	Hypoponera		Hypoponera Santschi, 1938	Santschi, 1938	Genus	Ant	Fernandes, I.O. | Souza, J.L.P.	1	Individual
PreservedSpecimen	IlhaPedras:km4:2011:1	2017-09-13	Invertebrate Collection of INPA / Environmental monitoring of ants (Hymenoptera: Formicidae) in the influence areas of Santo Antônio Hydroelectric Power-Plant in Rondônia, Brazil		en	Instituto Nacional de Pesquisas da Amazônia (INPA)	INPA		Instituto Nacional de Pesquisas da Amazônia - INPA / Invertebrate Collection		BR:INPA:HYM:000241	Fernandes, I.O. | Souza, J.L.P.		female	adult	non-reprodutcive	alcohol	in collection / wet vial	Animalia	Arthropoda	Insecta	Hymenoptera	Formicidae	Hypoponera		Hypoponera Santschi, 1938	Santschi, 1938	Genus	Ant	Fernandes, I.O. | Souza, J.L.P.	1	Individual
PreservedSpecimen	IlhaPedras:km2:2011:1	2017-09-13	Invertebrate Collection of INPA / Environmental monitoring of ants (Hymenoptera: Formicidae) in the influence areas of Santo Antônio Hydroelectric Power-Plant in Rondônia, Brazil		en	Instituto Nacional de Pesquisas da Amazônia (INPA)	INPA		Instituto Nacional de Pesquisas da Amazônia - INPA / Invertebrate Collection		BR:INPA:HYM:000242	Fernandes, I.O. | Souza, J.L.P.		female	adult	non-reprodutcive	alcohol	in collection / wet vial	Animalia	Arthropoda	Insecta	Hymenoptera	Formicidae	Hypoponera		Hypoponera Santschi, 1938	Santschi, 1938	Genus	Ant	Fernandes, I.O. | Souza, J.L.P.	1	Individual
PreservedSpecimen	IlhaBúfalos:km4:2011:1	2017-09-13	Invertebrate Collection of INPA / Environmental monitoring of ants (Hymenoptera: Formicidae) in the influence areas of Santo Antônio Hydroelectric Power-Plant in Rondônia, Brazil		en	Instituto Nacional de Pesquisas da Amazônia (INPA)	INPA		Instituto Nacional de Pesquisas da Amazônia - INPA / Invertebrate Collection		BR:INPA:HYM:000243	Fernandes, I.O. | Souza, J.L.P.		female	adult	non-reprodutcive	alcohol	in collection / wet vial	Animalia	Arthropoda	Insecta	Hymenoptera	Formicidae	Hypoponera		Hypoponera Santschi, 1938	Santschi, 1938	Genus	Ant	Fernandes, I.O. | Souza, J.L.P.	1	Individual
PreservedSpecimen	IlhaPedras:km4:2011:1	2017-09-13	Invertebrate Collection of INPA / Environmental monitoring of ants (Hymenoptera: Formicidae) in the influence areas of Santo Antônio Hydroelectric Power-Plant in Rondônia, Brazil		en	Instituto Nacional de Pesquisas da Amazônia (INPA)	INPA		Instituto Nacional de Pesquisas da Amazônia - INPA / Invertebrate Collection		BR:INPA:HYM:000244	Fernandes, I.O. | Souza, J.L.P.		female	adult	non-reprodutcive	alcohol	in collection / wet vial	Animalia	Arthropoda	Insecta	Hymenoptera	Formicidae	Hypoponera		Hypoponera Santschi, 1938	Santschi, 1938	Genus	Ant	Fernandes, I.O. | Souza, J.L.P.	1	Individual
PreservedSpecimen	IlhaBúfalos:km0:2011:1	2017-09-13	Invertebrate Collection of INPA / Environmental monitoring of ants (Hymenoptera: Formicidae) in the influence areas of Santo Antônio Hydroelectric Power-Plant in Rondônia, Brazil		en	Instituto Nacional de Pesquisas da Amazônia (INPA)	INPA		Instituto Nacional de Pesquisas da Amazônia - INPA / Invertebrate Collection		BR:INPA:HYM:000245	Fernandes, I.O. | Souza, J.L.P.		female	adult	non-reprodutcive	alcohol	in collection / wet vial	Animalia	Arthropoda	Insecta	Hymenoptera	Formicidae	Hypoponera		Hypoponera Santschi, 1938	Santschi, 1938	Genus	Ant	Fernandes, I.O. | Souza, J.L.P.	1	Individual
PreservedSpecimen	Jaci-ParanáMD:Km4:2011:1	2017-09-13	Invertebrate Collection of INPA / Environmental monitoring of ants (Hymenoptera: Formicidae) in the influence areas of Santo Antônio Hydroelectric Power-Plant in Rondônia, Brazil		en	Instituto Nacional de Pesquisas da Amazônia (INPA)	INPA		Instituto Nacional de Pesquisas da Amazônia - INPA / Invertebrate Collection		BR:INPA:HYM:000246	Fernandes, I.O. | Souza, J.L.P.		female	adult	non-reprodutcive	alcohol	in collection / wet vial	Animalia	Arthropoda	Insecta	Hymenoptera	Formicidae	Hypoponera		Hypoponera Santschi, 1938	Santschi, 1938	Genus	Ant	Fernandes, I.O. | Souza, J.L.P.	1	Individual
PreservedSpecimen	IlhaPedras:km2:2011:1	2017-09-13	Invertebrate Collection of INPA / Environmental monitoring of ants (Hymenoptera: Formicidae) in the influence areas of Santo Antônio Hydroelectric Power-Plant in Rondônia, Brazil		en	Instituto Nacional de Pesquisas da Amazônia (INPA)	INPA		Instituto Nacional de Pesquisas da Amazônia - INPA / Invertebrate Collection		BR:INPA:HYM:000247	Fernandes, I.O. | Souza, J.L.P.		female	adult	non-reprodutcive	alcohol	in collection / wet vial	Animalia	Arthropoda	Insecta	Hymenoptera	Formicidae	Hypoponera		Hypoponera Santschi, 1938	Santschi, 1938	Genus	Ant	Fernandes, I.O. | Souza, J.L.P.	1	Individual
PreservedSpecimen	IlhaPedras:km0.5:2011:1	2017-09-13	Invertebrate Collection of INPA / Environmental monitoring of ants (Hymenoptera: Formicidae) in the influence areas of Santo Antônio Hydroelectric Power-Plant in Rondônia, Brazil		en	Instituto Nacional de Pesquisas da Amazônia (INPA)	INPA		Instituto Nacional de Pesquisas da Amazônia - INPA / Invertebrate Collection		BR:INPA:HYM:000248	Fernandes, I.O. | Souza, J.L.P.		female	adult	non-reprodutcive	alcohol	in collection / wet vial	Animalia	Arthropoda	Insecta	Hymenoptera	Formicidae	Hypoponera		Hypoponera Santschi, 1938	Santschi, 1938	Genus	Ant	Fernandes, I.O. | Souza, J.L.P.	1	Individual
PreservedSpecimen	IlhaPedras:km3:2011:1	2017-09-13	Invertebrate Collection of INPA / Environmental monitoring of ants (Hymenoptera: Formicidae) in the influence areas of Santo Antônio Hydroelectric Power-Plant in Rondônia, Brazil		en	Instituto Nacional de Pesquisas da Amazônia (INPA)	INPA		Instituto Nacional de Pesquisas da Amazônia - INPA / Invertebrate Collection		BR:INPA:HYM:000249	Fernandes, I.O. | Souza, J.L.P.		female	adult	non-reprodutcive	alcohol	in collection / wet vial	Animalia	Arthropoda	Insecta	Hymenoptera	Formicidae	Hypoponera		Hypoponera Santschi, 1938	Santschi, 1938	Genus	Ant	Fernandes, I.O. | Souza, J.L.P.	1	Individual
PreservedSpecimen	IlhaPedras:km2:2011:1	2017-09-13	Invertebrate Collection of INPA / Environmental monitoring of ants (Hymenoptera: Formicidae) in the influence areas of Santo Antônio Hydroelectric Power-Plant in Rondônia, Brazil		en	Instituto Nacional de Pesquisas da Amazônia (INPA)	INPA		Instituto Nacional de Pesquisas da Amazônia - INPA / Invertebrate Collection		BR:INPA:HYM:000250	Fernandes, I.O. | Souza, J.L.P.		female	adult	non-reprodutcive	alcohol	in collection / wet vial	Animalia	Arthropoda	Insecta	Hymenoptera	Formicidae	Hypoponera		Hypoponera Santschi, 1938	Santschi, 1938	Genus	Ant	Fernandes, I.O. | Souza, J.L.P.	1	Individual
PreservedSpecimen	IlhaPedras:km2:2011:1	2017-09-13	Invertebrate Collection of INPA / Environmental monitoring of ants (Hymenoptera: Formicidae) in the influence areas of Santo Antônio Hydroelectric Power-Plant in Rondônia, Brazil		en	Instituto Nacional de Pesquisas da Amazônia (INPA)	INPA		Instituto Nacional de Pesquisas da Amazônia - INPA / Invertebrate Collection		BR:INPA:HYM:000251	Fernandes, I.O. | Souza, J.L.P.		female	adult	non-reprodutcive	alcohol	in collection / wet vial	Animalia	Arthropoda	Insecta	Hymenoptera	Formicidae	Hypoponera		Hypoponera Santschi, 1938	Santschi, 1938	Genus	Ant	Fernandes, I.O. | Souza, J.L.P.	1	Individual
PreservedSpecimen	Jaci-ParanáMD:Km0.5:2011:1	2017-09-13	Invertebrate Collection of INPA / Environmental monitoring of ants (Hymenoptera: Formicidae) in the influence areas of Santo Antônio Hydroelectric Power-Plant in Rondônia, Brazil		en	Instituto Nacional de Pesquisas da Amazônia (INPA)	INPA		Instituto Nacional de Pesquisas da Amazônia - INPA / Invertebrate Collection		BR:INPA:HYM:000252	Fernandes, I.O. | Souza, J.L.P.		female	adult	non-reprodutcive	alcohol	in collection / wet vial	Animalia	Arthropoda	Insecta	Hymenoptera	Formicidae	Hypoponera		Hypoponera Santschi, 1938	Santschi, 1938	Genus	Ant	Fernandes, I.O. | Souza, J.L.P.	1	Individual
PreservedSpecimen	IlhaPedras:km2:2011:1	2017-09-13	Invertebrate Collection of INPA / Environmental monitoring of ants (Hymenoptera: Formicidae) in the influence areas of Santo Antônio Hydroelectric Power-Plant in Rondônia, Brazil		en	Instituto Nacional de Pesquisas da Amazônia (INPA)	INPA		Instituto Nacional de Pesquisas da Amazônia - INPA / Invertebrate Collection		BR:INPA:HYM:000253	Fernandes, I.O. | Souza, J.L.P.		female	adult	non-reprodutcive	alcohol	in collection / wet vial	Animalia	Arthropoda	Insecta	Hymenoptera	Formicidae	Hypoponera		Hypoponera Santschi, 1938	Santschi, 1938	Genus	Ant	Fernandes, I.O. | Souza, J.L.P.	1	Individual
PreservedSpecimen	IlhaPedras:km3:2011:1	2017-09-13	Invertebrate Collection of INPA / Environmental monitoring of ants (Hymenoptera: Formicidae) in the influence areas of Santo Antônio Hydroelectric Power-Plant in Rondônia, Brazil		en	Instituto Nacional de Pesquisas da Amazônia (INPA)	INPA		Instituto Nacional de Pesquisas da Amazônia - INPA / Invertebrate Collection		BR:INPA:HYM:000254	Fernandes, I.O. | Souza, J.L.P.		female	adult	non-reprodutcive	alcohol	in collection / wet vial	Animalia	Arthropoda	Insecta	Hymenoptera	Formicidae	Hypoponera		Hypoponera Santschi, 1938	Santschi, 1938	Genus	Ant	Fernandes, I.O. | Souza, J.L.P.	1	Individual
PreservedSpecimen	IlhaBúfalos:km4:2011:1	2017-09-13	Invertebrate Collection of INPA / Environmental monitoring of ants (Hymenoptera: Formicidae) in the influence areas of Santo Antônio Hydroelectric Power-Plant in Rondônia, Brazil		en	Instituto Nacional de Pesquisas da Amazônia (INPA)	INPA		Instituto Nacional de Pesquisas da Amazônia - INPA / Invertebrate Collection		BR:INPA:HYM:000255	Fernandes, I.O. | Souza, J.L.P.		female	adult	non-reprodutcive	alcohol	in collection / wet vial	Animalia	Arthropoda	Insecta	Hymenoptera	Formicidae	Hypoponera		Hypoponera Santschi, 1938	Santschi, 1938	Genus	Ant	Fernandes, I.O. | Souza, J.L.P.	1	Individual
PreservedSpecimen	IlhaBúfalos:km4:2011:1	2017-09-13	Invertebrate Collection of INPA / Environmental monitoring of ants (Hymenoptera: Formicidae) in the influence areas of Santo Antônio Hydroelectric Power-Plant in Rondônia, Brazil		en	Instituto Nacional de Pesquisas da Amazônia (INPA)	INPA		Instituto Nacional de Pesquisas da Amazônia - INPA / Invertebrate Collection		BR:INPA:HYM:000256	Fernandes, I.O. | Souza, J.L.P.		female	adult	non-reprodutcive	alcohol	in collection / wet vial	Animalia	Arthropoda	Insecta	Hymenoptera	Formicidae	Syscia		Syscia Roger, 1861	Roger, 1861	Genus	Ant	Fernandes, I.O. | Souza, J.L.P.	1	Individual
PreservedSpecimen	Morrinhos:Km0:2011:1	2017-09-13	Invertebrate Collection of INPA / Environmental monitoring of ants (Hymenoptera: Formicidae) in the influence areas of Santo Antônio Hydroelectric Power-Plant in Rondônia, Brazil		en	Instituto Nacional de Pesquisas da Amazônia (INPA)	INPA		Instituto Nacional de Pesquisas da Amazônia - INPA / Invertebrate Collection		BR:INPA:HYM:000257	Fernandes, I.O. | Souza, J.L.P.		female	adult	non-reprodutcive	alcohol	in collection / wet vial	Animalia	Arthropoda	Insecta	Hymenoptera	Formicidae	Megalomyrmex	leoninus	Megalomyrmex leoninus Forel, 1885	Forel, 1885	Species	Ant	Fernandes, I.O. | Souza, J.L.P.	1	Individual
PreservedSpecimen	IlhaBúfalos:km0.5:2011:1	2017-09-13	Invertebrate Collection of INPA / Environmental monitoring of ants (Hymenoptera: Formicidae) in the influence areas of Santo Antônio Hydroelectric Power-Plant in Rondônia, Brazil		en	Instituto Nacional de Pesquisas da Amazônia (INPA)	INPA		Instituto Nacional de Pesquisas da Amazônia - INPA / Invertebrate Collection		BR:INPA:HYM:000258	Fernandes, I.O. | Souza, J.L.P.		female	adult	non-reprodutcive	alcohol	in collection / wet vial	Animalia	Arthropoda	Insecta	Hymenoptera	Formicidae	Megalomyrmex	leoninus	Megalomyrmex leoninus Forel, 1885	Forel, 1885	Species	Ant	Fernandes, I.O. | Souza, J.L.P.	1	Individual
PreservedSpecimen	IlhaBúfalos:km1:2011:1	2017-09-13	Invertebrate Collection of INPA / Environmental monitoring of ants (Hymenoptera: Formicidae) in the influence areas of Santo Antônio Hydroelectric Power-Plant in Rondônia, Brazil		en	Instituto Nacional de Pesquisas da Amazônia (INPA)	INPA		Instituto Nacional de Pesquisas da Amazônia - INPA / Invertebrate Collection		BR:INPA:HYM:000259	Fernandes, I.O. | Souza, J.L.P.		female	adult	non-reprodutcive	alcohol	in collection / wet vial	Animalia	Arthropoda	Insecta	Hymenoptera	Formicidae	Megalomyrmex	leoninus	Megalomyrmex leoninus Forel, 1885	Forel, 1885	Species	Ant	Fernandes, I.O. | Souza, J.L.P.	1	Individual
PreservedSpecimen	Morrinhos:Km1:2011:1	2017-09-13	Invertebrate Collection of INPA / Environmental monitoring of ants (Hymenoptera: Formicidae) in the influence areas of Santo Antônio Hydroelectric Power-Plant in Rondônia, Brazil		en	Instituto Nacional de Pesquisas da Amazônia (INPA)	INPA		Instituto Nacional de Pesquisas da Amazônia - INPA / Invertebrate Collection		BR:INPA:HYM:000260	Fernandes, I.O. | Souza, J.L.P.		female	adult	non-reprodutcive	alcohol	in collection / wet vial	Animalia	Arthropoda	Insecta	Hymenoptera	Formicidae	Megalomyrmex	leoninus	Megalomyrmex leoninus Forel, 1885	Forel, 1885	Species	Ant	Fernandes, I.O. | Souza, J.L.P.	1	Individual
PreservedSpecimen	Morrinhos:Km0:2011:1	2017-09-13	Invertebrate Collection of INPA / Environmental monitoring of ants (Hymenoptera: Formicidae) in the influence areas of Santo Antônio Hydroelectric Power-Plant in Rondônia, Brazil		en	Instituto Nacional de Pesquisas da Amazônia (INPA)	INPA		Instituto Nacional de Pesquisas da Amazônia - INPA / Invertebrate Collection		BR:INPA:HYM:000261	Fernandes, I.O. | Souza, J.L.P.		female	adult	non-reprodutcive	alcohol	in collection / wet vial	Animalia	Arthropoda	Insecta	Hymenoptera	Formicidae	Megalomyrmex	leoninus	Megalomyrmex leoninus Forel, 1885	Forel, 1885	Species	Ant	Fernandes, I.O. | Souza, J.L.P.	1	Individual
PreservedSpecimen	IlhaBúfalos:km3:2011:1	2017-09-13	Invertebrate Collection of INPA / Environmental monitoring of ants (Hymenoptera: Formicidae) in the influence areas of Santo Antônio Hydroelectric Power-Plant in Rondônia, Brazil		en	Instituto Nacional de Pesquisas da Amazônia (INPA)	INPA		Instituto Nacional de Pesquisas da Amazônia - INPA / Invertebrate Collection		BR:INPA:HYM:000262	Fernandes, I.O. | Souza, J.L.P.		female	adult	non-reprodutcive	alcohol	in collection / wet vial	Animalia	Arthropoda	Insecta	Hymenoptera	Formicidae	Megalomyrmex	leoninus	Megalomyrmex leoninus Forel, 1885	Forel, 1885	Species	Ant	Fernandes, I.O. | Souza, J.L.P.	1	Individual
PreservedSpecimen	Morrinhos:Km3:2011:1	2017-09-13	Invertebrate Collection of INPA / Environmental monitoring of ants (Hymenoptera: Formicidae) in the influence areas of Santo Antônio Hydroelectric Power-Plant in Rondônia, Brazil		en	Instituto Nacional de Pesquisas da Amazônia (INPA)	INPA		Instituto Nacional de Pesquisas da Amazônia - INPA / Invertebrate Collection		BR:INPA:HYM:000263	Fernandes, I.O. | Souza, J.L.P.		female	adult	non-reprodutcive	alcohol	in collection / wet vial	Animalia	Arthropoda	Insecta	Hymenoptera	Formicidae	Megalomyrmex	leoninus	Megalomyrmex leoninus Forel, 1885	Forel, 1885	Species	Ant	Fernandes, I.O. | Souza, J.L.P.	1	Individual
PreservedSpecimen	Morrinhos:Km4:2011:1	2017-09-13	Invertebrate Collection of INPA / Environmental monitoring of ants (Hymenoptera: Formicidae) in the influence areas of Santo Antônio Hydroelectric Power-Plant in Rondônia, Brazil		en	Instituto Nacional de Pesquisas da Amazônia (INPA)	INPA		Instituto Nacional de Pesquisas da Amazônia - INPA / Invertebrate Collection		BR:INPA:HYM:000264	Fernandes, I.O. | Souza, J.L.P.		female	adult	non-reprodutcive	alcohol	in collection / wet vial	Animalia	Arthropoda	Insecta	Hymenoptera	Formicidae	Megalomyrmex	leoninus	Megalomyrmex leoninus Forel, 1885	Forel, 1885	Species	Ant	Fernandes, I.O. | Souza, J.L.P.	1	Individual
PreservedSpecimen	Morrinhos:Km0.5:2011:1	2017-09-13	Invertebrate Collection of INPA / Environmental monitoring of ants (Hymenoptera: Formicidae) in the influence areas of Santo Antônio Hydroelectric Power-Plant in Rondônia, Brazil		en	Instituto Nacional de Pesquisas da Amazônia (INPA)	INPA		Instituto Nacional de Pesquisas da Amazônia - INPA / Invertebrate Collection		BR:INPA:HYM:000265	Fernandes, I.O. | Souza, J.L.P.		female	adult	non-reprodutcive	alcohol	in collection / wet vial	Animalia	Arthropoda	Insecta	Hymenoptera	Formicidae	Megalomyrmex	leoninus	Megalomyrmex leoninus Forel, 1885	Forel, 1885	Species	Ant	Fernandes, I.O. | Souza, J.L.P.	1	Individual
PreservedSpecimen	Morrinhos:Km0:2011:1	2017-09-13	Invertebrate Collection of INPA / Environmental monitoring of ants (Hymenoptera: Formicidae) in the influence areas of Santo Antônio Hydroelectric Power-Plant in Rondônia, Brazil		en	Instituto Nacional de Pesquisas da Amazônia (INPA)	INPA		Instituto Nacional de Pesquisas da Amazônia - INPA / Invertebrate Collection		BR:INPA:HYM:000266	Fernandes, I.O. | Souza, J.L.P.		female	adult	non-reprodutcive	alcohol	in collection / wet vial	Animalia	Arthropoda	Insecta	Hymenoptera	Formicidae	Megalomyrmex	leoninus	Megalomyrmex leoninus Forel, 1885	Forel, 1885	Species	Ant	Fernandes, I.O. | Souza, J.L.P.	1	Individual
PreservedSpecimen	IlhaBúfalos:Km2:2011:2	2017-09-13	Invertebrate Collection of INPA / Environmental monitoring of ants (Hymenoptera: Formicidae) in the influence areas of Santo Antônio Hydroelectric Power-Plant in Rondônia, Brazil		en	Instituto Nacional de Pesquisas da Amazônia (INPA)	INPA		Instituto Nacional de Pesquisas da Amazônia - INPA / Invertebrate Collection		BR:INPA:HYM:000267	Fernandes, I.O. | Souza, J.L.P.		female	adult	non-reprodutcive	alcohol	in collection / wet vial	Animalia	Arthropoda	Insecta	Hymenoptera	Formicidae	Megalomyrmex	leoninus	Megalomyrmex leoninus Forel, 1885	Forel, 1885	Species	Ant	Fernandes, I.O. | Souza, J.L.P.	1	Individual
PreservedSpecimen	IlhaBúfalos:km3:2011:1	2017-09-13	Invertebrate Collection of INPA / Environmental monitoring of ants (Hymenoptera: Formicidae) in the influence areas of Santo Antônio Hydroelectric Power-Plant in Rondônia, Brazil		en	Instituto Nacional de Pesquisas da Amazônia (INPA)	INPA		Instituto Nacional de Pesquisas da Amazônia - INPA / Invertebrate Collection		BR:INPA:HYM:000268	Fernandes, I.O. | Souza, J.L.P.		female	adult	non-reprodutcive	alcohol	in collection / wet vial	Animalia	Arthropoda	Insecta	Hymenoptera	Formicidae	Megalomyrmex	leoninus	Megalomyrmex leoninus Forel, 1885	Forel, 1885	Species	Ant	Fernandes, I.O. | Souza, J.L.P.	1	Individual
PreservedSpecimen	Morrinhos:Km4:2011:1	2017-09-13	Invertebrate Collection of INPA / Environmental monitoring of ants (Hymenoptera: Formicidae) in the influence areas of Santo Antônio Hydroelectric Power-Plant in Rondônia, Brazil		en	Instituto Nacional de Pesquisas da Amazônia (INPA)	INPA		Instituto Nacional de Pesquisas da Amazônia - INPA / Invertebrate Collection		BR:INPA:HYM:000269	Fernandes, I.O. | Souza, J.L.P.		female	adult	non-reprodutcive	alcohol	in collection / wet vial	Animalia	Arthropoda	Insecta	Hymenoptera	Formicidae	Megalomyrmex	leoninus	Megalomyrmex leoninus Forel, 1885	Forel, 1885	Species	Ant	Fernandes, I.O. | Souza, J.L.P.	1	Individual
PreservedSpecimen	IlhaBúfalos:km0.5:2011:1	2017-09-13	Invertebrate Collection of INPA / Environmental monitoring of ants (Hymenoptera: Formicidae) in the influence areas of Santo Antônio Hydroelectric Power-Plant in Rondônia, Brazil		en	Instituto Nacional de Pesquisas da Amazônia (INPA)	INPA		Instituto Nacional de Pesquisas da Amazônia - INPA / Invertebrate Collection		BR:INPA:HYM:000270	Fernandes, I.O. | Souza, J.L.P.		female	adult	non-reprodutcive	alcohol	in collection / wet vial	Animalia	Arthropoda	Insecta	Hymenoptera	Formicidae	Megalomyrmex	leoninus	Megalomyrmex leoninus Forel, 1885	Forel, 1885	Species	Ant	Fernandes, I.O. | Souza, J.L.P.	1	Individual
PreservedSpecimen	IlhaPedras:km0.5:2011:1	2017-09-13	Invertebrate Collection of INPA / Environmental monitoring of ants (Hymenoptera: Formicidae) in the influence areas of Santo Antônio Hydroelectric Power-Plant in Rondônia, Brazil		en	Instituto Nacional de Pesquisas da Amazônia (INPA)	INPA		Instituto Nacional de Pesquisas da Amazônia - INPA / Invertebrate Collection		BR:INPA:HYM:000271	Fernandes, I.O. | Souza, J.L.P.		female	adult	non-reprodutcive	alcohol	in collection / wet vial	Animalia	Arthropoda	Insecta	Hymenoptera	Formicidae	Megalomyrmex	leoninus	Megalomyrmex leoninus Forel, 1885	Forel, 1885	Species	Ant	Fernandes, I.O. | Souza, J.L.P.	1	Individual
PreservedSpecimen	Morrinhos:Km1:2011:1	2017-09-13	Invertebrate Collection of INPA / Environmental monitoring of ants (Hymenoptera: Formicidae) in the influence areas of Santo Antônio Hydroelectric Power-Plant in Rondônia, Brazil		en	Instituto Nacional de Pesquisas da Amazônia (INPA)	INPA		Instituto Nacional de Pesquisas da Amazônia - INPA / Invertebrate Collection		BR:INPA:HYM:000272	Fernandes, I.O. | Souza, J.L.P.		female	adult	non-reprodutcive	alcohol	in collection / wet vial	Animalia	Arthropoda	Insecta	Hymenoptera	Formicidae	Megalomyrmex	leoninus	Megalomyrmex leoninus Forel, 1885	Forel, 1885	Species	Ant	Fernandes, I.O. | Souza, J.L.P.	1	Individual
PreservedSpecimen	Morrinhos:Km2:2011:1	2017-09-13	Invertebrate Collection of INPA / Environmental monitoring of ants (Hymenoptera: Formicidae) in the influence areas of Santo Antônio Hydroelectric Power-Plant in Rondônia, Brazil		en	Instituto Nacional de Pesquisas da Amazônia (INPA)	INPA		Instituto Nacional de Pesquisas da Amazônia - INPA / Invertebrate Collection		BR:INPA:HYM:000273	Fernandes, I.O. | Souza, J.L.P.		female	adult	non-reprodutcive	alcohol	in collection / wet vial	Animalia	Arthropoda	Insecta	Hymenoptera	Formicidae	Megalomyrmex	leoninus	Megalomyrmex leoninus Forel, 1885	Forel, 1885	Species	Ant	Fernandes, I.O. | Souza, J.L.P.	1	Individual
PreservedSpecimen	Morrinhos:Km3:2011:1	2017-09-13	Invertebrate Collection of INPA / Environmental monitoring of ants (Hymenoptera: Formicidae) in the influence areas of Santo Antônio Hydroelectric Power-Plant in Rondônia, Brazil		en	Instituto Nacional de Pesquisas da Amazônia (INPA)	INPA		Instituto Nacional de Pesquisas da Amazônia - INPA / Invertebrate Collection		BR:INPA:HYM:000274	Fernandes, I.O. | Souza, J.L.P.		female	adult	non-reprodutcive	alcohol	in collection / wet vial	Animalia	Arthropoda	Insecta	Hymenoptera	Formicidae	Megalomyrmex	leoninus	Megalomyrmex leoninus Forel, 1885	Forel, 1885	Species	Ant	Fernandes, I.O. | Souza, J.L.P.	1	Individual
PreservedSpecimen	Jaci-ParanáMD:Km2:2011:1	2017-09-13	Invertebrate Collection of INPA / Environmental monitoring of ants (Hymenoptera: Formicidae) in the influence areas of Santo Antônio Hydroelectric Power-Plant in Rondônia, Brazil		en	Instituto Nacional de Pesquisas da Amazônia (INPA)	INPA		Instituto Nacional de Pesquisas da Amazônia - INPA / Invertebrate Collection		BR:INPA:HYM:000275	Fernandes, I.O. | Souza, J.L.P.		female	adult	non-reprodutcive	alcohol	in collection / wet vial	Animalia	Arthropoda	Insecta	Hymenoptera	Formicidae	Megalomyrmex		Megalomyrmex Forel, 1885	Forel, 1885	Genus	Ant	Fernandes, I.O. | Souza, J.L.P.	1	Individual
PreservedSpecimen	Jaci-ParanáMD:Km4:2011:1	2017-09-13	Invertebrate Collection of INPA / Environmental monitoring of ants (Hymenoptera: Formicidae) in the influence areas of Santo Antônio Hydroelectric Power-Plant in Rondônia, Brazil		en	Instituto Nacional de Pesquisas da Amazônia (INPA)	INPA		Instituto Nacional de Pesquisas da Amazônia - INPA / Invertebrate Collection		BR:INPA:HYM:000276	Fernandes, I.O. | Souza, J.L.P.		female	adult	non-reprodutcive	alcohol	in collection / wet vial	Animalia	Arthropoda	Insecta	Hymenoptera	Formicidae	Megalomyrmex		Megalomyrmex Forel, 1885	Forel, 1885	Genus	Ant	Fernandes, I.O. | Souza, J.L.P.	1	Individual
PreservedSpecimen	Jaci-ParanáMD:Km4:2011:1	2017-09-13	Invertebrate Collection of INPA / Environmental monitoring of ants (Hymenoptera: Formicidae) in the influence areas of Santo Antônio Hydroelectric Power-Plant in Rondônia, Brazil		en	Instituto Nacional de Pesquisas da Amazônia (INPA)	INPA		Instituto Nacional de Pesquisas da Amazônia - INPA / Invertebrate Collection		BR:INPA:HYM:000277	Fernandes, I.O. | Souza, J.L.P.		female	adult	non-reprodutcive	alcohol	in collection / wet vial	Animalia	Arthropoda	Insecta	Hymenoptera	Formicidae	Megalomyrmex	cuatiara	Megalomyrmex cuatiara Brandão, 1990	Brandão, 1990	Species	Ant	Fernandes, I.O. | Souza, J.L.P.	1	Individual
PreservedSpecimen	IlhaBúfalos:km1:2011:1	2017-09-13	Invertebrate Collection of INPA / Environmental monitoring of ants (Hymenoptera: Formicidae) in the influence areas of Santo Antônio Hydroelectric Power-Plant in Rondônia, Brazil		en	Instituto Nacional de Pesquisas da Amazônia (INPA)	INPA		Instituto Nacional de Pesquisas da Amazônia - INPA / Invertebrate Collection		BR:INPA:HYM:000278	Fernandes, I.O. | Souza, J.L.P.		female	adult	non-reprodutcive	alcohol	in collection / wet vial	Animalia	Arthropoda	Insecta	Hymenoptera	Formicidae	Nylanderia		Nylanderia Emery, 1906	Emery, 1906	Genus	Ant	Fernandes, I.O. | Souza, J.L.P.	1	Individual
PreservedSpecimen	Jaci-ParanáMD:Km0:2011:1	2017-09-13	Invertebrate Collection of INPA / Environmental monitoring of ants (Hymenoptera: Formicidae) in the influence areas of Santo Antônio Hydroelectric Power-Plant in Rondônia, Brazil		en	Instituto Nacional de Pesquisas da Amazônia (INPA)	INPA		Instituto Nacional de Pesquisas da Amazônia - INPA / Invertebrate Collection		BR:INPA:HYM:000279	Fernandes, I.O. | Souza, J.L.P.		female	adult	non-reprodutcive	alcohol	in collection / wet vial	Animalia	Arthropoda	Insecta	Hymenoptera	Formicidae	Nylanderia		Nylanderia Emery, 1906	Emery, 1906	Genus	Ant	Fernandes, I.O. | Souza, J.L.P.	1	Individual
PreservedSpecimen	Jaci-ParanáMD:Km1:2011:1	2017-09-13	Invertebrate Collection of INPA / Environmental monitoring of ants (Hymenoptera: Formicidae) in the influence areas of Santo Antônio Hydroelectric Power-Plant in Rondônia, Brazil		en	Instituto Nacional de Pesquisas da Amazônia (INPA)	INPA		Instituto Nacional de Pesquisas da Amazônia - INPA / Invertebrate Collection		BR:INPA:HYM:000280	Fernandes, I.O. | Souza, J.L.P.		female	adult	non-reprodutcive	alcohol	in collection / wet vial	Animalia	Arthropoda	Insecta	Hymenoptera	Formicidae	Nylanderia		Nylanderia Emery, 1906	Emery, 1906	Genus	Ant	Fernandes, I.O. | Souza, J.L.P.	1	Individual
PreservedSpecimen	IlhaPedras:km0:2011:1	2017-09-13	Invertebrate Collection of INPA / Environmental monitoring of ants (Hymenoptera: Formicidae) in the influence areas of Santo Antônio Hydroelectric Power-Plant in Rondônia, Brazil		en	Instituto Nacional de Pesquisas da Amazônia (INPA)	INPA		Instituto Nacional de Pesquisas da Amazônia - INPA / Invertebrate Collection		BR:INPA:HYM:000281	Fernandes, I.O. | Souza, J.L.P.		female	adult	non-reprodutcive	alcohol	in collection / wet vial	Animalia	Arthropoda	Insecta	Hymenoptera	Formicidae	Nylanderia		Nylanderia Emery, 1906	Emery, 1906	Genus	Ant	Fernandes, I.O. | Souza, J.L.P.	1	Individual
PreservedSpecimen	IlhaBúfalos:km1:2011:1	2017-09-13	Invertebrate Collection of INPA / Environmental monitoring of ants (Hymenoptera: Formicidae) in the influence areas of Santo Antônio Hydroelectric Power-Plant in Rondônia, Brazil		en	Instituto Nacional de Pesquisas da Amazônia (INPA)	INPA		Instituto Nacional de Pesquisas da Amazônia - INPA / Invertebrate Collection		BR:INPA:HYM:000282	Fernandes, I.O. | Souza, J.L.P.		female	adult	non-reprodutcive	alcohol	in collection / wet vial	Animalia	Arthropoda	Insecta	Hymenoptera	Formicidae	Nylanderia		Nylanderia Emery, 1906	Emery, 1906	Genus	Ant	Fernandes, I.O. | Souza, J.L.P.	1	Individual
PreservedSpecimen	IlhaBúfalos:km2:2011:1	2017-09-13	Invertebrate Collection of INPA / Environmental monitoring of ants (Hymenoptera: Formicidae) in the influence areas of Santo Antônio Hydroelectric Power-Plant in Rondônia, Brazil		en	Instituto Nacional de Pesquisas da Amazônia (INPA)	INPA		Instituto Nacional de Pesquisas da Amazônia - INPA / Invertebrate Collection		BR:INPA:HYM:000283	Fernandes, I.O. | Souza, J.L.P.		female	adult	non-reprodutcive	alcohol	in collection / wet vial	Animalia	Arthropoda	Insecta	Hymenoptera	Formicidae	Nylanderia		Nylanderia Emery, 1906	Emery, 1906	Genus	Ant	Fernandes, I.O. | Souza, J.L.P.	1	Individual
PreservedSpecimen	Jaci-ParanáMD:Km3:2011:1	2017-09-13	Invertebrate Collection of INPA / Environmental monitoring of ants (Hymenoptera: Formicidae) in the influence areas of Santo Antônio Hydroelectric Power-Plant in Rondônia, Brazil		en	Instituto Nacional de Pesquisas da Amazônia (INPA)	INPA		Instituto Nacional de Pesquisas da Amazônia - INPA / Invertebrate Collection		BR:INPA:HYM:000284	Fernandes, I.O. | Souza, J.L.P.		female	adult	non-reprodutcive	alcohol	in collection / wet vial	Animalia	Arthropoda	Insecta	Hymenoptera	Formicidae	Nylanderia		Nylanderia Emery, 1906	Emery, 1906	Genus	Ant	Fernandes, I.O. | Souza, J.L.P.	1	Individual
PreservedSpecimen	Morrinhos:Km0:2011:1	2017-09-13	Invertebrate Collection of INPA / Environmental monitoring of ants (Hymenoptera: Formicidae) in the influence areas of Santo Antônio Hydroelectric Power-Plant in Rondônia, Brazil		en	Instituto Nacional de Pesquisas da Amazônia (INPA)	INPA		Instituto Nacional de Pesquisas da Amazônia - INPA / Invertebrate Collection		BR:INPA:HYM:000285	Fernandes, I.O. | Souza, J.L.P.		female	adult	non-reprodutcive	alcohol	in collection / wet vial	Animalia	Arthropoda	Insecta	Hymenoptera	Formicidae	Nylanderia		Nylanderia Emery, 1906	Emery, 1906	Genus	Ant	Fernandes, I.O. | Souza, J.L.P.	1	Individual
PreservedSpecimen	Jaci-ParanáMD:Km3:2011:1	2017-09-13	Invertebrate Collection of INPA / Environmental monitoring of ants (Hymenoptera: Formicidae) in the influence areas of Santo Antônio Hydroelectric Power-Plant in Rondônia, Brazil		en	Instituto Nacional de Pesquisas da Amazônia (INPA)	INPA		Instituto Nacional de Pesquisas da Amazônia - INPA / Invertebrate Collection		BR:INPA:HYM:000286	Fernandes, I.O. | Souza, J.L.P.		female	adult	non-reprodutcive	alcohol	in collection / wet vial	Animalia	Arthropoda	Insecta	Hymenoptera	Formicidae	Nylanderia		Nylanderia Emery, 1906	Emery, 1906	Genus	Ant	Fernandes, I.O. | Souza, J.L.P.	1	Individual
PreservedSpecimen	Morrinhos:Km3:2011:1	2017-09-13	Invertebrate Collection of INPA / Environmental monitoring of ants (Hymenoptera: Formicidae) in the influence areas of Santo Antônio Hydroelectric Power-Plant in Rondônia, Brazil		en	Instituto Nacional de Pesquisas da Amazônia (INPA)	INPA		Instituto Nacional de Pesquisas da Amazônia - INPA / Invertebrate Collection		BR:INPA:HYM:000287	Fernandes, I.O. | Souza, J.L.P.		female	adult	non-reprodutcive	alcohol	in collection / wet vial	Animalia	Arthropoda	Insecta	Hymenoptera	Formicidae	Nylanderia		Nylanderia Emery, 1906	Emery, 1906	Genus	Ant	Fernandes, I.O. | Souza, J.L.P.	1	Individual
PreservedSpecimen	Morrinhos:Km3:2011:1	2017-09-13	Invertebrate Collection of INPA / Environmental monitoring of ants (Hymenoptera: Formicidae) in the influence areas of Santo Antônio Hydroelectric Power-Plant in Rondônia, Brazil		en	Instituto Nacional de Pesquisas da Amazônia (INPA)	INPA		Instituto Nacional de Pesquisas da Amazônia - INPA / Invertebrate Collection		BR:INPA:HYM:000288	Fernandes, I.O. | Souza, J.L.P.		female	adult	non-reprodutcive	alcohol	in collection / wet vial	Animalia	Arthropoda	Insecta	Hymenoptera	Formicidae	Nylanderia		Nylanderia Emery, 1906	Emery, 1906	Genus	Ant	Fernandes, I.O. | Souza, J.L.P.	1	Individual
PreservedSpecimen	IlhaBúfalos:km0.5:2011:1	2017-09-13	Invertebrate Collection of INPA / Environmental monitoring of ants (Hymenoptera: Formicidae) in the influence areas of Santo Antônio Hydroelectric Power-Plant in Rondônia, Brazil		en	Instituto Nacional de Pesquisas da Amazônia (INPA)	INPA		Instituto Nacional de Pesquisas da Amazônia - INPA / Invertebrate Collection		BR:INPA:HYM:000289	Fernandes, I.O. | Souza, J.L.P.		female	adult	non-reprodutcive	alcohol	in collection / wet vial	Animalia	Arthropoda	Insecta	Hymenoptera	Formicidae	Nylanderia		Nylanderia Emery, 1906	Emery, 1906	Genus	Ant	Fernandes, I.O. | Souza, J.L.P.	1	Individual
PreservedSpecimen	Morrinhos:Km1:2011:1	2017-09-13	Invertebrate Collection of INPA / Environmental monitoring of ants (Hymenoptera: Formicidae) in the influence areas of Santo Antônio Hydroelectric Power-Plant in Rondônia, Brazil		en	Instituto Nacional de Pesquisas da Amazônia (INPA)	INPA		Instituto Nacional de Pesquisas da Amazônia - INPA / Invertebrate Collection		BR:INPA:HYM:000290	Fernandes, I.O. | Souza, J.L.P.		female	adult	non-reprodutcive	alcohol	in collection / wet vial	Animalia	Arthropoda	Insecta	Hymenoptera	Formicidae	Nylanderia		Nylanderia Emery, 1906	Emery, 1906	Genus	Ant	Fernandes, I.O. | Souza, J.L.P.	1	Individual
PreservedSpecimen	IlhaBúfalos:km2:2011:1	2017-09-13	Invertebrate Collection of INPA / Environmental monitoring of ants (Hymenoptera: Formicidae) in the influence areas of Santo Antônio Hydroelectric Power-Plant in Rondônia, Brazil		en	Instituto Nacional de Pesquisas da Amazônia (INPA)	INPA		Instituto Nacional de Pesquisas da Amazônia - INPA / Invertebrate Collection		BR:INPA:HYM:000291	Fernandes, I.O. | Souza, J.L.P.		female	adult	non-reprodutcive	alcohol	in collection / wet vial	Animalia	Arthropoda	Insecta	Hymenoptera	Formicidae	Nylanderia		Nylanderia Emery, 1906	Emery, 1906	Genus	Ant	Fernandes, I.O. | Souza, J.L.P.	1	Individual
PreservedSpecimen	Morrinhos:Km3:2011:1	2017-09-13	Invertebrate Collection of INPA / Environmental monitoring of ants (Hymenoptera: Formicidae) in the influence areas of Santo Antônio Hydroelectric Power-Plant in Rondônia, Brazil		en	Instituto Nacional de Pesquisas da Amazônia (INPA)	INPA		Instituto Nacional de Pesquisas da Amazônia - INPA / Invertebrate Collection		BR:INPA:HYM:000292	Fernandes, I.O. | Souza, J.L.P.		female	adult	non-reprodutcive	alcohol	in collection / wet vial	Animalia	Arthropoda	Insecta	Hymenoptera	Formicidae	Nylanderia		Nylanderia Emery, 1906	Emery, 1906	Genus	Ant	Fernandes, I.O. | Souza, J.L.P.	1	Individual
PreservedSpecimen	Morrinhos:Km4:2011:1	2017-09-13	Invertebrate Collection of INPA / Environmental monitoring of ants (Hymenoptera: Formicidae) in the influence areas of Santo Antônio Hydroelectric Power-Plant in Rondônia, Brazil		en	Instituto Nacional de Pesquisas da Amazônia (INPA)	INPA		Instituto Nacional de Pesquisas da Amazônia - INPA / Invertebrate Collection		BR:INPA:HYM:000293	Fernandes, I.O. | Souza, J.L.P.		female	adult	non-reprodutcive	alcohol	in collection / wet vial	Animalia	Arthropoda	Insecta	Hymenoptera	Formicidae	Nylanderia		Nylanderia Emery, 1906	Emery, 1906	Genus	Ant	Fernandes, I.O. | Souza, J.L.P.	1	Individual
PreservedSpecimen	IlhaBúfalos:km2:2011:1	2017-09-13	Invertebrate Collection of INPA / Environmental monitoring of ants (Hymenoptera: Formicidae) in the influence areas of Santo Antônio Hydroelectric Power-Plant in Rondônia, Brazil		en	Instituto Nacional de Pesquisas da Amazônia (INPA)	INPA		Instituto Nacional de Pesquisas da Amazônia - INPA / Invertebrate Collection		BR:INPA:HYM:000294	Fernandes, I.O. | Souza, J.L.P.		female	adult	non-reprodutcive	alcohol	in collection / wet vial	Animalia	Arthropoda	Insecta	Hymenoptera	Formicidae	Nylanderia		Nylanderia Emery, 1906	Emery, 1906	Genus	Ant	Fernandes, I.O. | Souza, J.L.P.	1	Individual
PreservedSpecimen	IlhaPedras:km4:2011:1	2017-09-13	Invertebrate Collection of INPA / Environmental monitoring of ants (Hymenoptera: Formicidae) in the influence areas of Santo Antônio Hydroelectric Power-Plant in Rondônia, Brazil		en	Instituto Nacional de Pesquisas da Amazônia (INPA)	INPA		Instituto Nacional de Pesquisas da Amazônia - INPA / Invertebrate Collection		BR:INPA:HYM:000295	Fernandes, I.O. | Souza, J.L.P.		female	adult	non-reprodutcive	alcohol	in collection / wet vial	Animalia	Arthropoda	Insecta	Hymenoptera	Formicidae	Nylanderia		Nylanderia Emery, 1906	Emery, 1906	Genus	Ant	Fernandes, I.O. | Souza, J.L.P.	1	Individual
PreservedSpecimen	IlhaPedras:km2:2011:1	2017-09-13	Invertebrate Collection of INPA / Environmental monitoring of ants (Hymenoptera: Formicidae) in the influence areas of Santo Antônio Hydroelectric Power-Plant in Rondônia, Brazil		en	Instituto Nacional de Pesquisas da Amazônia (INPA)	INPA		Instituto Nacional de Pesquisas da Amazônia - INPA / Invertebrate Collection		BR:INPA:HYM:000296	Fernandes, I.O. | Souza, J.L.P.		female	adult	non-reprodutcive	alcohol	in collection / wet vial	Animalia	Arthropoda	Insecta	Hymenoptera	Formicidae	Nylanderia		Nylanderia Emery, 1906	Emery, 1906	Genus	Ant	Fernandes, I.O. | Souza, J.L.P.	1	Individual
PreservedSpecimen	Morrinhos:Km2:2011:1	2017-09-13	Invertebrate Collection of INPA / Environmental monitoring of ants (Hymenoptera: Formicidae) in the influence areas of Santo Antônio Hydroelectric Power-Plant in Rondônia, Brazil		en	Instituto Nacional de Pesquisas da Amazônia (INPA)	INPA		Instituto Nacional de Pesquisas da Amazônia - INPA / Invertebrate Collection		BR:INPA:HYM:000297	Fernandes, I.O. | Souza, J.L.P.		female	adult	non-reprodutcive	alcohol	in collection / wet vial	Animalia	Arthropoda	Insecta	Hymenoptera	Formicidae	Nylanderia		Nylanderia Emery, 1906	Emery, 1906	Genus	Ant	Fernandes, I.O. | Souza, J.L.P.	1	Individual
PreservedSpecimen	IlhaPedras:km2:2011:1	2017-09-13	Invertebrate Collection of INPA / Environmental monitoring of ants (Hymenoptera: Formicidae) in the influence areas of Santo Antônio Hydroelectric Power-Plant in Rondônia, Brazil		en	Instituto Nacional de Pesquisas da Amazônia (INPA)	INPA		Instituto Nacional de Pesquisas da Amazônia - INPA / Invertebrate Collection		BR:INPA:HYM:000298	Fernandes, I.O. | Souza, J.L.P.		female	adult	non-reprodutcive	alcohol	in collection / wet vial	Animalia	Arthropoda	Insecta	Hymenoptera	Formicidae	Nylanderia		Nylanderia Emery, 1906	Emery, 1906	Genus	Ant	Fernandes, I.O. | Souza, J.L.P.	1	Individual
PreservedSpecimen	Morrinhos:Km2:2011:1	2017-09-13	Invertebrate Collection of INPA / Environmental monitoring of ants (Hymenoptera: Formicidae) in the influence areas of Santo Antônio Hydroelectric Power-Plant in Rondônia, Brazil		en	Instituto Nacional de Pesquisas da Amazônia (INPA)	INPA		Instituto Nacional de Pesquisas da Amazônia - INPA / Invertebrate Collection		BR:INPA:HYM:000299	Fernandes, I.O. | Souza, J.L.P.		female	adult	non-reprodutcive	alcohol	in collection / wet vial	Animalia	Arthropoda	Insecta	Hymenoptera	Formicidae	Nylanderia		Nylanderia Emery, 1906	Emery, 1906	Genus	Ant	Fernandes, I.O. | Souza, J.L.P.	1	Individual
PreservedSpecimen	IlhaBúfalos:km3:2011:1	2017-09-13	Invertebrate Collection of INPA / Environmental monitoring of ants (Hymenoptera: Formicidae) in the influence areas of Santo Antônio Hydroelectric Power-Plant in Rondônia, Brazil		en	Instituto Nacional de Pesquisas da Amazônia (INPA)	INPA		Instituto Nacional de Pesquisas da Amazônia - INPA / Invertebrate Collection		BR:INPA:HYM:000300	Fernandes, I.O. | Souza, J.L.P.		female	adult	non-reprodutcive	alcohol	in collection / wet vial	Animalia	Arthropoda	Insecta	Hymenoptera	Formicidae	Nylanderia		Nylanderia Emery, 1906	Emery, 1906	Genus	Ant	Fernandes, I.O. | Souza, J.L.P.	1	Individual
PreservedSpecimen	IlhaPedras:km4:2011:1	2017-09-13	Invertebrate Collection of INPA / Environmental monitoring of ants (Hymenoptera: Formicidae) in the influence areas of Santo Antônio Hydroelectric Power-Plant in Rondônia, Brazil		en	Instituto Nacional de Pesquisas da Amazônia (INPA)	INPA		Instituto Nacional de Pesquisas da Amazônia - INPA / Invertebrate Collection		BR:INPA:HYM:000301	Fernandes, I.O. | Souza, J.L.P.		female	adult	non-reprodutcive	alcohol	in collection / wet vial	Animalia	Arthropoda	Insecta	Hymenoptera	Formicidae	Nylanderia		Nylanderia Emery, 1906	Emery, 1906	Genus	Ant	Fernandes, I.O. | Souza, J.L.P.	1	Individual
PreservedSpecimen	Morrinhos:Km4:2011:1	2017-09-13	Invertebrate Collection of INPA / Environmental monitoring of ants (Hymenoptera: Formicidae) in the influence areas of Santo Antônio Hydroelectric Power-Plant in Rondônia, Brazil		en	Instituto Nacional de Pesquisas da Amazônia (INPA)	INPA		Instituto Nacional de Pesquisas da Amazônia - INPA / Invertebrate Collection		BR:INPA:HYM:000302	Fernandes, I.O. | Souza, J.L.P.		female	adult	non-reprodutcive	alcohol	in collection / wet vial	Animalia	Arthropoda	Insecta	Hymenoptera	Formicidae	Nylanderia		Nylanderia Emery, 1906	Emery, 1906	Genus	Ant	Fernandes, I.O. | Souza, J.L.P.	1	Individual
PreservedSpecimen	IlhaBúfalos:km0:2011:1	2017-09-13	Invertebrate Collection of INPA / Environmental monitoring of ants (Hymenoptera: Formicidae) in the influence areas of Santo Antônio Hydroelectric Power-Plant in Rondônia, Brazil		en	Instituto Nacional de Pesquisas da Amazônia (INPA)	INPA		Instituto Nacional de Pesquisas da Amazônia - INPA / Invertebrate Collection		BR:INPA:HYM:000303	Fernandes, I.O. | Souza, J.L.P.		female	adult	non-reprodutcive	alcohol	in collection / wet vial	Animalia	Arthropoda	Insecta	Hymenoptera	Formicidae	Nylanderia		Nylanderia Emery, 1906	Emery, 1906	Genus	Ant	Fernandes, I.O. | Souza, J.L.P.	1	Individual
PreservedSpecimen	Morrinhos:Km2:2011:1	2017-09-13	Invertebrate Collection of INPA / Environmental monitoring of ants (Hymenoptera: Formicidae) in the influence areas of Santo Antônio Hydroelectric Power-Plant in Rondônia, Brazil		en	Instituto Nacional de Pesquisas da Amazônia (INPA)	INPA		Instituto Nacional de Pesquisas da Amazônia - INPA / Invertebrate Collection		BR:INPA:HYM:000304	Fernandes, I.O. | Souza, J.L.P.		female	adult	non-reprodutcive	alcohol	in collection / wet vial	Animalia	Arthropoda	Insecta	Hymenoptera	Formicidae	Nylanderia		Nylanderia Emery, 1906	Emery, 1906	Genus	Ant	Fernandes, I.O. | Souza, J.L.P.	1	Individual
PreservedSpecimen	Morrinhos:Km3:2011:1	2017-09-13	Invertebrate Collection of INPA / Environmental monitoring of ants (Hymenoptera: Formicidae) in the influence areas of Santo Antônio Hydroelectric Power-Plant in Rondônia, Brazil		en	Instituto Nacional de Pesquisas da Amazônia (INPA)	INPA		Instituto Nacional de Pesquisas da Amazônia - INPA / Invertebrate Collection		BR:INPA:HYM:000305	Fernandes, I.O. | Souza, J.L.P.		female	adult	non-reprodutcive	alcohol	in collection / wet vial	Animalia	Arthropoda	Insecta	Hymenoptera	Formicidae	Nylanderia		Nylanderia Emery, 1906	Emery, 1906	Genus	Ant	Fernandes, I.O. | Souza, J.L.P.	1	Individual
PreservedSpecimen	IlhaPedras:km0.5:2011:1	2017-09-13	Invertebrate Collection of INPA / Environmental monitoring of ants (Hymenoptera: Formicidae) in the influence areas of Santo Antônio Hydroelectric Power-Plant in Rondônia, Brazil		en	Instituto Nacional de Pesquisas da Amazônia (INPA)	INPA		Instituto Nacional de Pesquisas da Amazônia - INPA / Invertebrate Collection		BR:INPA:HYM:000306	Fernandes, I.O. | Souza, J.L.P.		female	adult	non-reprodutcive	alcohol	in collection / wet vial	Animalia	Arthropoda	Insecta	Hymenoptera	Formicidae	Nylanderia		Nylanderia Emery, 1906	Emery, 1906	Genus	Ant	Fernandes, I.O. | Souza, J.L.P.	1	Individual
PreservedSpecimen	IlhaBúfalos:km2:2011:1	2017-09-13	Invertebrate Collection of INPA / Environmental monitoring of ants (Hymenoptera: Formicidae) in the influence areas of Santo Antônio Hydroelectric Power-Plant in Rondônia, Brazil		en	Instituto Nacional de Pesquisas da Amazônia (INPA)	INPA		Instituto Nacional de Pesquisas da Amazônia - INPA / Invertebrate Collection		BR:INPA:HYM:000307	Fernandes, I.O. | Souza, J.L.P.		female	adult	non-reprodutcive	alcohol	in collection / wet vial	Animalia	Arthropoda	Insecta	Hymenoptera	Formicidae	Nylanderia		Nylanderia Emery, 1906	Emery, 1906	Genus	Ant	Fernandes, I.O. | Souza, J.L.P.	1	Individual
PreservedSpecimen	Morrinhos:Km4:2011:1	2017-09-13	Invertebrate Collection of INPA / Environmental monitoring of ants (Hymenoptera: Formicidae) in the influence areas of Santo Antônio Hydroelectric Power-Plant in Rondônia, Brazil		en	Instituto Nacional de Pesquisas da Amazônia (INPA)	INPA		Instituto Nacional de Pesquisas da Amazônia - INPA / Invertebrate Collection		BR:INPA:HYM:000308	Fernandes, I.O. | Souza, J.L.P.		female	adult	non-reprodutcive	alcohol	in collection / wet vial	Animalia	Arthropoda	Insecta	Hymenoptera	Formicidae	Nylanderia		Nylanderia Emery, 1906	Emery, 1906	Genus	Ant	Fernandes, I.O. | Souza, J.L.P.	1	Individual
PreservedSpecimen	IlhaPedras:km4:2011:1	2017-09-13	Invertebrate Collection of INPA / Environmental monitoring of ants (Hymenoptera: Formicidae) in the influence areas of Santo Antônio Hydroelectric Power-Plant in Rondônia, Brazil		en	Instituto Nacional de Pesquisas da Amazônia (INPA)	INPA		Instituto Nacional de Pesquisas da Amazônia - INPA / Invertebrate Collection		BR:INPA:HYM:000309	Fernandes, I.O. | Souza, J.L.P.		female	adult	non-reprodutcive	alcohol	in collection / wet vial	Animalia	Arthropoda	Insecta	Hymenoptera	Formicidae	Nylanderia		Nylanderia Emery, 1906	Emery, 1906	Genus	Ant	Fernandes, I.O. | Souza, J.L.P.	1	Individual
PreservedSpecimen	Morrinhos:Km4:2011:1	2017-09-13	Invertebrate Collection of INPA / Environmental monitoring of ants (Hymenoptera: Formicidae) in the influence areas of Santo Antônio Hydroelectric Power-Plant in Rondônia, Brazil		en	Instituto Nacional de Pesquisas da Amazônia (INPA)	INPA		Instituto Nacional de Pesquisas da Amazônia - INPA / Invertebrate Collection		BR:INPA:HYM:000310	Fernandes, I.O. | Souza, J.L.P.		female	adult	non-reprodutcive	alcohol	in collection / wet vial	Animalia	Arthropoda	Insecta	Hymenoptera	Formicidae	Nylanderia		Nylanderia Emery, 1906	Emery, 1906	Genus	Ant	Fernandes, I.O. | Souza, J.L.P.	1	Individual
PreservedSpecimen	IlhaBúfalos:km0:2011:1	2017-09-13	Invertebrate Collection of INPA / Environmental monitoring of ants (Hymenoptera: Formicidae) in the influence areas of Santo Antônio Hydroelectric Power-Plant in Rondônia, Brazil		en	Instituto Nacional de Pesquisas da Amazônia (INPA)	INPA		Instituto Nacional de Pesquisas da Amazônia - INPA / Invertebrate Collection		BR:INPA:HYM:000311	Fernandes, I.O. | Souza, J.L.P.		female	adult	non-reprodutcive	alcohol	in collection / wet vial	Animalia	Arthropoda	Insecta	Hymenoptera	Formicidae	Nylanderia		Nylanderia Emery, 1906	Emery, 1906	Genus	Ant	Fernandes, I.O. | Souza, J.L.P.	1	Individual
PreservedSpecimen	Morrinhos:Km2:2011:1	2017-09-13	Invertebrate Collection of INPA / Environmental monitoring of ants (Hymenoptera: Formicidae) in the influence areas of Santo Antônio Hydroelectric Power-Plant in Rondônia, Brazil		en	Instituto Nacional de Pesquisas da Amazônia (INPA)	INPA		Instituto Nacional de Pesquisas da Amazônia - INPA / Invertebrate Collection		BR:INPA:HYM:000312	Fernandes, I.O. | Souza, J.L.P.		female	adult	non-reprodutcive	alcohol	in collection / wet vial	Animalia	Arthropoda	Insecta	Hymenoptera	Formicidae	Nylanderia		Nylanderia Emery, 1906	Emery, 1906	Genus	Ant	Fernandes, I.O. | Souza, J.L.P.	1	Individual
PreservedSpecimen	Morrinhos:Km3:2011:1	2017-09-13	Invertebrate Collection of INPA / Environmental monitoring of ants (Hymenoptera: Formicidae) in the influence areas of Santo Antônio Hydroelectric Power-Plant in Rondônia, Brazil		en	Instituto Nacional de Pesquisas da Amazônia (INPA)	INPA		Instituto Nacional de Pesquisas da Amazônia - INPA / Invertebrate Collection		BR:INPA:HYM:000313	Fernandes, I.O. | Souza, J.L.P.		female	adult	non-reprodutcive	alcohol	in collection / wet vial	Animalia	Arthropoda	Insecta	Hymenoptera	Formicidae	Nylanderia		Nylanderia Emery, 1906	Emery, 1906	Genus	Ant	Fernandes, I.O. | Souza, J.L.P.	1	Individual
PreservedSpecimen	Morrinhos:Km4:2011:1	2017-09-13	Invertebrate Collection of INPA / Environmental monitoring of ants (Hymenoptera: Formicidae) in the influence areas of Santo Antônio Hydroelectric Power-Plant in Rondônia, Brazil		en	Instituto Nacional de Pesquisas da Amazônia (INPA)	INPA		Instituto Nacional de Pesquisas da Amazônia - INPA / Invertebrate Collection		BR:INPA:HYM:000314	Fernandes, I.O. | Souza, J.L.P.		female	adult	non-reprodutcive	alcohol	in collection / wet vial	Animalia	Arthropoda	Insecta	Hymenoptera	Formicidae	Nylanderia		Nylanderia Emery, 1906	Emery, 1906	Genus	Ant	Fernandes, I.O. | Souza, J.L.P.	1	Individual
PreservedSpecimen	Jaci-ParanáMD:Km3:2011:1	2017-09-13	Invertebrate Collection of INPA / Environmental monitoring of ants (Hymenoptera: Formicidae) in the influence areas of Santo Antônio Hydroelectric Power-Plant in Rondônia, Brazil		en	Instituto Nacional de Pesquisas da Amazônia (INPA)	INPA		Instituto Nacional de Pesquisas da Amazônia - INPA / Invertebrate Collection		BR:INPA:HYM:000315	Fernandes, I.O. | Souza, J.L.P.		female	adult	non-reprodutcive	alcohol	in collection / wet vial	Animalia	Arthropoda	Insecta	Hymenoptera	Formicidae	Odontomachus	chelifer	Odontomachus chelifer (Latreille, 1802)	(Latreille, 1802)	Species	Ant	Fernandes, I.O. | Souza, J.L.P.	1	Individual
PreservedSpecimen	Jaci-ParanáMD:Km0:2011:1	2017-09-13	Invertebrate Collection of INPA / Environmental monitoring of ants (Hymenoptera: Formicidae) in the influence areas of Santo Antônio Hydroelectric Power-Plant in Rondônia, Brazil		en	Instituto Nacional de Pesquisas da Amazônia (INPA)	INPA		Instituto Nacional de Pesquisas da Amazônia - INPA / Invertebrate Collection		BR:INPA:HYM:000316	Fernandes, I.O. | Souza, J.L.P.		female	adult	non-reprodutcive	alcohol	in collection / wet vial	Animalia	Arthropoda	Insecta	Hymenoptera	Formicidae	Odontomachus	chelifer	Odontomachus chelifer (Latreille, 1802)	(Latreille, 1802)	Species	Ant	Fernandes, I.O. | Souza, J.L.P.	1	Individual
PreservedSpecimen	Jaci-ParanáMD:Km0:2011:1	2017-09-13	Invertebrate Collection of INPA / Environmental monitoring of ants (Hymenoptera: Formicidae) in the influence areas of Santo Antônio Hydroelectric Power-Plant in Rondônia, Brazil		en	Instituto Nacional de Pesquisas da Amazônia (INPA)	INPA		Instituto Nacional de Pesquisas da Amazônia - INPA / Invertebrate Collection		BR:INPA:HYM:000317	Fernandes, I.O. | Souza, J.L.P.		female	adult	non-reprodutcive	alcohol	in collection / wet vial	Animalia	Arthropoda	Insecta	Hymenoptera	Formicidae	Odontomachus	chelifer	Odontomachus chelifer (Latreille, 1802)	(Latreille, 1802)	Species	Ant	Fernandes, I.O. | Souza, J.L.P.	1	Individual
PreservedSpecimen	IlhaPedras:km0.5:2011:1	2017-09-13	Invertebrate Collection of INPA / Environmental monitoring of ants (Hymenoptera: Formicidae) in the influence areas of Santo Antônio Hydroelectric Power-Plant in Rondônia, Brazil		en	Instituto Nacional de Pesquisas da Amazônia (INPA)	INPA		Instituto Nacional de Pesquisas da Amazônia - INPA / Invertebrate Collection		BR:INPA:HYM:000318	Fernandes, I.O. | Souza, J.L.P.		female	adult	non-reprodutcive	alcohol	in collection / wet vial	Animalia	Arthropoda	Insecta	Hymenoptera	Formicidae	Odontomachus	haematodus	Odontomachus haematodus (Linnaeus, 1758)	(Linnaeus, 1758)	Species	Ant	Fernandes, I.O. | Souza, J.L.P.	1	Individual
PreservedSpecimen	IlhaPedras:km4:2011:1	2017-09-13	Invertebrate Collection of INPA / Environmental monitoring of ants (Hymenoptera: Formicidae) in the influence areas of Santo Antônio Hydroelectric Power-Plant in Rondônia, Brazil		en	Instituto Nacional de Pesquisas da Amazônia (INPA)	INPA		Instituto Nacional de Pesquisas da Amazônia - INPA / Invertebrate Collection		BR:INPA:HYM:000319	Fernandes, I.O. | Souza, J.L.P.		female	adult	non-reprodutcive	alcohol	in collection / wet vial	Animalia	Arthropoda	Insecta	Hymenoptera	Formicidae	Odontomachus	haematodus	Odontomachus haematodus (Linnaeus, 1758)	(Linnaeus, 1758)	Species	Ant	Fernandes, I.O. | Souza, J.L.P.	1	Individual
PreservedSpecimen	Morrinhos:Km4:2011:1	2017-09-13	Invertebrate Collection of INPA / Environmental monitoring of ants (Hymenoptera: Formicidae) in the influence areas of Santo Antônio Hydroelectric Power-Plant in Rondônia, Brazil		en	Instituto Nacional de Pesquisas da Amazônia (INPA)	INPA		Instituto Nacional de Pesquisas da Amazônia - INPA / Invertebrate Collection		BR:INPA:HYM:000320	Fernandes, I.O. | Souza, J.L.P.		female	adult	non-reprodutcive	alcohol	in collection / wet vial	Animalia	Arthropoda	Insecta	Hymenoptera	Formicidae	Odontomachus	haematodus	Odontomachus haematodus (Linnaeus, 1758)	(Linnaeus, 1758)	Species	Ant	Fernandes, I.O. | Souza, J.L.P.	1	Individual
PreservedSpecimen	Morrinhos:Km0.5:2011:1	2017-09-13	Invertebrate Collection of INPA / Environmental monitoring of ants (Hymenoptera: Formicidae) in the influence areas of Santo Antônio Hydroelectric Power-Plant in Rondônia, Brazil		en	Instituto Nacional de Pesquisas da Amazônia (INPA)	INPA		Instituto Nacional de Pesquisas da Amazônia - INPA / Invertebrate Collection		BR:INPA:HYM:000321	Fernandes, I.O. | Souza, J.L.P.		female	adult	non-reprodutcive	alcohol	in collection / wet vial	Animalia	Arthropoda	Insecta	Hymenoptera	Formicidae	Odontomachus	haematodus	Odontomachus haematodus (Linnaeus, 1758)	(Linnaeus, 1758)	Species	Ant	Fernandes, I.O. | Souza, J.L.P.	1	Individual
PreservedSpecimen	Morrinhos:Km1:2011:1	2017-09-13	Invertebrate Collection of INPA / Environmental monitoring of ants (Hymenoptera: Formicidae) in the influence areas of Santo Antônio Hydroelectric Power-Plant in Rondônia, Brazil		en	Instituto Nacional de Pesquisas da Amazônia (INPA)	INPA		Instituto Nacional de Pesquisas da Amazônia - INPA / Invertebrate Collection		BR:INPA:HYM:000322	Fernandes, I.O. | Souza, J.L.P.		female	adult	non-reprodutcive	alcohol	in collection / wet vial	Animalia	Arthropoda	Insecta	Hymenoptera	Formicidae	Odontomachus	haematodus	Odontomachus haematodus (Linnaeus, 1758)	(Linnaeus, 1758)	Species	Ant	Fernandes, I.O. | Souza, J.L.P.	1	Individual
PreservedSpecimen	IlhaBúfalos:km2:2011:1	2017-09-13	Invertebrate Collection of INPA / Environmental monitoring of ants (Hymenoptera: Formicidae) in the influence areas of Santo Antônio Hydroelectric Power-Plant in Rondônia, Brazil		en	Instituto Nacional de Pesquisas da Amazônia (INPA)	INPA		Instituto Nacional de Pesquisas da Amazônia - INPA / Invertebrate Collection		BR:INPA:HYM:000323	Fernandes, I.O. | Souza, J.L.P.		female	adult	non-reprodutcive	alcohol	in collection / wet vial	Animalia	Arthropoda	Insecta	Hymenoptera	Formicidae	Odontomachus	haematodus	Odontomachus haematodus (Linnaeus, 1758)	(Linnaeus, 1758)	Species	Ant	Fernandes, I.O. | Souza, J.L.P.	1	Individual
PreservedSpecimen	IlhaPedras:km0.5:2011:1	2017-09-13	Invertebrate Collection of INPA / Environmental monitoring of ants (Hymenoptera: Formicidae) in the influence areas of Santo Antônio Hydroelectric Power-Plant in Rondônia, Brazil		en	Instituto Nacional de Pesquisas da Amazônia (INPA)	INPA		Instituto Nacional de Pesquisas da Amazônia - INPA / Invertebrate Collection		BR:INPA:HYM:000324	Fernandes, I.O. | Souza, J.L.P.		female	adult	non-reprodutcive	alcohol	in collection / wet vial	Animalia	Arthropoda	Insecta	Hymenoptera	Formicidae	Odontomachus	haematodus	Odontomachus haematodus (Linnaeus, 1758)	(Linnaeus, 1758)	Species	Ant	Fernandes, I.O. | Souza, J.L.P.	1	Individual
PreservedSpecimen	Jaci-ParanáMD:Km0.5:2011:1	2017-09-13	Invertebrate Collection of INPA / Environmental monitoring of ants (Hymenoptera: Formicidae) in the influence areas of Santo Antônio Hydroelectric Power-Plant in Rondônia, Brazil		en	Instituto Nacional de Pesquisas da Amazônia (INPA)	INPA		Instituto Nacional de Pesquisas da Amazônia - INPA / Invertebrate Collection		BR:INPA:HYM:000325	Fernandes, I.O. | Souza, J.L.P.		female	adult	non-reprodutcive	alcohol	in collection / wet vial	Animalia	Arthropoda	Insecta	Hymenoptera	Formicidae	Odontomachus	haematodus	Odontomachus haematodus (Linnaeus, 1758)	(Linnaeus, 1758)	Species	Ant	Fernandes, I.O. | Souza, J.L.P.	1	Individual
PreservedSpecimen	Jaci-ParanáMD:Km1:2011:1	2017-09-13	Invertebrate Collection of INPA / Environmental monitoring of ants (Hymenoptera: Formicidae) in the influence areas of Santo Antônio Hydroelectric Power-Plant in Rondônia, Brazil		en	Instituto Nacional de Pesquisas da Amazônia (INPA)	INPA		Instituto Nacional de Pesquisas da Amazônia - INPA / Invertebrate Collection		BR:INPA:HYM:000326	Fernandes, I.O. | Souza, J.L.P.		female	adult	non-reprodutcive	alcohol	in collection / wet vial	Animalia	Arthropoda	Insecta	Hymenoptera	Formicidae	Odontomachus	meinerti	Odontomachus meinerti Forel, 1905	Forel, 1905	Species	Ant	Fernandes, I.O. | Souza, J.L.P.	1	Individual
PreservedSpecimen	Jaci-ParanáMD:Km0:2011:1	2017-09-13	Invertebrate Collection of INPA / Environmental monitoring of ants (Hymenoptera: Formicidae) in the influence areas of Santo Antônio Hydroelectric Power-Plant in Rondônia, Brazil		en	Instituto Nacional de Pesquisas da Amazônia (INPA)	INPA		Instituto Nacional de Pesquisas da Amazônia - INPA / Invertebrate Collection		BR:INPA:HYM:000327	Fernandes, I.O. | Souza, J.L.P.		female	adult	non-reprodutcive	alcohol	in collection / wet vial	Animalia	Arthropoda	Insecta	Hymenoptera	Formicidae	Odontomachus	meinerti	Odontomachus meinerti Forel, 1905	Forel, 1905	Species	Ant	Fernandes, I.O. | Souza, J.L.P.	1	Individual
PreservedSpecimen	IlhaPedras:km2:2011:1	2017-09-13	Invertebrate Collection of INPA / Environmental monitoring of ants (Hymenoptera: Formicidae) in the influence areas of Santo Antônio Hydroelectric Power-Plant in Rondônia, Brazil		en	Instituto Nacional de Pesquisas da Amazônia (INPA)	INPA		Instituto Nacional de Pesquisas da Amazônia - INPA / Invertebrate Collection		BR:INPA:HYM:000328	Fernandes, I.O. | Souza, J.L.P.		female	adult	non-reprodutcive	alcohol	in collection / wet vial	Animalia	Arthropoda	Insecta	Hymenoptera	Formicidae	Odontomachus		Odontomachus Latreille, 1804	Latreille, 1804	Genus	Ant	Fernandes, I.O. | Souza, J.L.P.	1	Individual
PreservedSpecimen	IlhaPedras:km2:2011:1	2017-09-13	Invertebrate Collection of INPA / Environmental monitoring of ants (Hymenoptera: Formicidae) in the influence areas of Santo Antônio Hydroelectric Power-Plant in Rondônia, Brazil		en	Instituto Nacional de Pesquisas da Amazônia (INPA)	INPA		Instituto Nacional de Pesquisas da Amazônia - INPA / Invertebrate Collection		BR:INPA:HYM:000329	Fernandes, I.O. | Souza, J.L.P.		female	adult	non-reprodutcive	alcohol	in collection / wet vial	Animalia	Arthropoda	Insecta	Hymenoptera	Formicidae	Odontomachus		Odontomachus Latreille, 1804	Latreille, 1804	Genus	Ant	Fernandes, I.O. | Souza, J.L.P.	1	Individual
PreservedSpecimen	IlhaPedras:km0:2011:1	2017-09-13	Invertebrate Collection of INPA / Environmental monitoring of ants (Hymenoptera: Formicidae) in the influence areas of Santo Antônio Hydroelectric Power-Plant in Rondônia, Brazil		en	Instituto Nacional de Pesquisas da Amazônia (INPA)	INPA		Instituto Nacional de Pesquisas da Amazônia - INPA / Invertebrate Collection		BR:INPA:HYM:000330	Fernandes, I.O. | Souza, J.L.P.		female	adult	non-reprodutcive	alcohol	in collection / wet vial	Animalia	Arthropoda	Insecta	Hymenoptera	Formicidae	Rasopone	arhuaca	Rasopone arhuaca (Forel, 1901)	(Forel, 1901)	Species	Ant	Fernandes, I.O. | Souza, J.L.P.	1	Individual
PreservedSpecimen	Jaci-ParanáMD:Km3:2011:1	2017-09-13	Invertebrate Collection of INPA / Environmental monitoring of ants (Hymenoptera: Formicidae) in the influence areas of Santo Antônio Hydroelectric Power-Plant in Rondônia, Brazil		en	Instituto Nacional de Pesquisas da Amazônia (INPA)	INPA		Instituto Nacional de Pesquisas da Amazônia - INPA / Invertebrate Collection		BR:INPA:HYM:000331	Fernandes, I.O. | Souza, J.L.P.		female	adult	non-reprodutcive	alcohol	in collection / wet vial	Animalia	Arthropoda	Insecta	Hymenoptera	Formicidae	Rasopone	arhuaca	Rasopone arhuaca (Forel, 1901)	(Forel, 1901)	Species	Ant	Fernandes, I.O. | Souza, J.L.P.	1	Individual
PreservedSpecimen	Jaci-ParanáMD:Km3:2011:1	2017-09-13	Invertebrate Collection of INPA / Environmental monitoring of ants (Hymenoptera: Formicidae) in the influence areas of Santo Antônio Hydroelectric Power-Plant in Rondônia, Brazil		en	Instituto Nacional de Pesquisas da Amazônia (INPA)	INPA		Instituto Nacional de Pesquisas da Amazônia - INPA / Invertebrate Collection		BR:INPA:HYM:000332	Fernandes, I.O. | Souza, J.L.P.		female	adult	non-reprodutcive	alcohol	in collection / wet vial	Animalia	Arthropoda	Insecta	Hymenoptera	Formicidae	Neoponera	cavinodis	Neoponera cavinodis Mann, 1916	Mann, 1916	Species	Ant	Fernandes, I.O. | Souza, J.L.P.	1	Individual
PreservedSpecimen	IlhaPedras:km0.5:2011:1	2017-09-13	Invertebrate Collection of INPA / Environmental monitoring of ants (Hymenoptera: Formicidae) in the influence areas of Santo Antônio Hydroelectric Power-Plant in Rondônia, Brazil		en	Instituto Nacional de Pesquisas da Amazônia (INPA)	INPA		Instituto Nacional de Pesquisas da Amazônia - INPA / Invertebrate Collection		BR:INPA:HYM:000333	Fernandes, I.O. | Souza, J.L.P.		female	adult	non-reprodutcive	alcohol	in collection / wet vial	Animalia	Arthropoda	Insecta	Hymenoptera	Formicidae	Neoponera	commutata	Neoponera commutata (Roger, 1860)	(Roger, 1860)	Species	Ant	Fernandes, I.O. | Souza, J.L.P.	1	Individual
PreservedSpecimen	IlhaBúfalos:km4:2011:1	2017-09-13	Invertebrate Collection of INPA / Environmental monitoring of ants (Hymenoptera: Formicidae) in the influence areas of Santo Antônio Hydroelectric Power-Plant in Rondônia, Brazil		en	Instituto Nacional de Pesquisas da Amazônia (INPA)	INPA		Instituto Nacional de Pesquisas da Amazônia - INPA / Invertebrate Collection		BR:INPA:HYM:000334	Fernandes, I.O. | Souza, J.L.P.		female	adult	non-reprodutcive	alcohol	in collection / wet vial	Animalia	Arthropoda	Insecta	Hymenoptera	Formicidae	Neoponera	commutata	Neoponera commutata (Roger, 1860)	(Roger, 1860)	Species	Ant	Fernandes, I.O. | Souza, J.L.P.	1	Individual
PreservedSpecimen	IlhaPedras:km2:2011:1	2017-09-13	Invertebrate Collection of INPA / Environmental monitoring of ants (Hymenoptera: Formicidae) in the influence areas of Santo Antônio Hydroelectric Power-Plant in Rondônia, Brazil		en	Instituto Nacional de Pesquisas da Amazônia (INPA)	INPA		Instituto Nacional de Pesquisas da Amazônia - INPA / Invertebrate Collection		BR:INPA:HYM:000335	Fernandes, I.O. | Souza, J.L.P.		female	adult	non-reprodutcive	alcohol	in collection / wet vial	Animalia	Arthropoda	Insecta	Hymenoptera	Formicidae	Mayaponera	constricta	Mayaponera constricta (Mayr, 1884)	(Mayr, 1884)	Species	Ant	Fernandes, I.O. | Souza, J.L.P.	1	Individual
PreservedSpecimen	IlhaPedras:km2:2011:1	2017-09-13	Invertebrate Collection of INPA / Environmental monitoring of ants (Hymenoptera: Formicidae) in the influence areas of Santo Antônio Hydroelectric Power-Plant in Rondônia, Brazil		en	Instituto Nacional de Pesquisas da Amazônia (INPA)	INPA		Instituto Nacional de Pesquisas da Amazônia - INPA / Invertebrate Collection		BR:INPA:HYM:000336	Fernandes, I.O. | Souza, J.L.P.		female	adult	non-reprodutcive	alcohol	in collection / wet vial	Animalia	Arthropoda	Insecta	Hymenoptera	Formicidae	Mayaponera	constricta	Mayaponera constricta (Mayr, 1884)	(Mayr, 1884)	Species	Ant	Fernandes, I.O. | Souza, J.L.P.	1	Individual
PreservedSpecimen	Jaci-ParanáMD:Km0:2011:1	2017-09-13	Invertebrate Collection of INPA / Environmental monitoring of ants (Hymenoptera: Formicidae) in the influence areas of Santo Antônio Hydroelectric Power-Plant in Rondônia, Brazil		en	Instituto Nacional de Pesquisas da Amazônia (INPA)	INPA		Instituto Nacional de Pesquisas da Amazônia - INPA / Invertebrate Collection		BR:INPA:HYM:000337	Fernandes, I.O. | Souza, J.L.P.		female	adult	non-reprodutcive	alcohol	in collection / wet vial	Animalia	Arthropoda	Insecta	Hymenoptera	Formicidae	Mayaponera	constricta	Mayaponera constricta (Mayr, 1884)	(Mayr, 1884)	Species	Ant	Fernandes, I.O. | Souza, J.L.P.	1	Individual
PreservedSpecimen	IlhaBúfalos:km2:2011:1	2017-09-13	Invertebrate Collection of INPA / Environmental monitoring of ants (Hymenoptera: Formicidae) in the influence areas of Santo Antônio Hydroelectric Power-Plant in Rondônia, Brazil		en	Instituto Nacional de Pesquisas da Amazônia (INPA)	INPA		Instituto Nacional de Pesquisas da Amazônia - INPA / Invertebrate Collection		BR:INPA:HYM:000338	Fernandes, I.O. | Souza, J.L.P.		female	adult	non-reprodutcive	alcohol	in collection / wet vial	Animalia	Arthropoda	Insecta	Hymenoptera	Formicidae	Mayaponera	constricta	Mayaponera constricta (Mayr, 1884)	(Mayr, 1884)	Species	Ant	Fernandes, I.O. | Souza, J.L.P.	1	Individual
PreservedSpecimen	Morrinhos:Km2:2011:1	2017-09-13	Invertebrate Collection of INPA / Environmental monitoring of ants (Hymenoptera: Formicidae) in the influence areas of Santo Antônio Hydroelectric Power-Plant in Rondônia, Brazil		en	Instituto Nacional de Pesquisas da Amazônia (INPA)	INPA		Instituto Nacional de Pesquisas da Amazônia - INPA / Invertebrate Collection		BR:INPA:HYM:000339	Fernandes, I.O. | Souza, J.L.P.		female	adult	non-reprodutcive	alcohol	in collection / wet vial	Animalia	Arthropoda	Insecta	Hymenoptera	Formicidae	Mayaponera	constricta	Mayaponera constricta (Mayr, 1884)	(Mayr, 1884)	Species	Ant	Fernandes, I.O. | Souza, J.L.P.	1	Individual
PreservedSpecimen	Jaci-ParanáMD:Km0:2011:1	2017-09-13	Invertebrate Collection of INPA / Environmental monitoring of ants (Hymenoptera: Formicidae) in the influence areas of Santo Antônio Hydroelectric Power-Plant in Rondônia, Brazil		en	Instituto Nacional de Pesquisas da Amazônia (INPA)	INPA		Instituto Nacional de Pesquisas da Amazônia - INPA / Invertebrate Collection		BR:INPA:HYM:000340	Fernandes, I.O. | Souza, J.L.P.		female	adult	non-reprodutcive	alcohol	in collection / wet vial	Animalia	Arthropoda	Insecta	Hymenoptera	Formicidae	Mayaponera	constricta	Mayaponera constricta (Mayr, 1884)	(Mayr, 1884)	Species	Ant	Fernandes, I.O. | Souza, J.L.P.	1	Individual
PreservedSpecimen	Morrinhos:Km0.5:2011:1	2017-09-13	Invertebrate Collection of INPA / Environmental monitoring of ants (Hymenoptera: Formicidae) in the influence areas of Santo Antônio Hydroelectric Power-Plant in Rondônia, Brazil		en	Instituto Nacional de Pesquisas da Amazônia (INPA)	INPA		Instituto Nacional de Pesquisas da Amazônia - INPA / Invertebrate Collection		BR:INPA:HYM:000341	Fernandes, I.O. | Souza, J.L.P.		female	adult	non-reprodutcive	alcohol	in collection / wet vial	Animalia	Arthropoda	Insecta	Hymenoptera	Formicidae	Mayaponera	constricta	Mayaponera constricta (Mayr, 1884)	(Mayr, 1884)	Species	Ant	Fernandes, I.O. | Souza, J.L.P.	1	Individual
PreservedSpecimen	Jaci-ParanáMD:Km1:2011:1	2017-09-13	Invertebrate Collection of INPA / Environmental monitoring of ants (Hymenoptera: Formicidae) in the influence areas of Santo Antônio Hydroelectric Power-Plant in Rondônia, Brazil		en	Instituto Nacional de Pesquisas da Amazônia (INPA)	INPA		Instituto Nacional de Pesquisas da Amazônia - INPA / Invertebrate Collection		BR:INPA:HYM:000342	Fernandes, I.O. | Souza, J.L.P.		female	adult	non-reprodutcive	alcohol	in collection / wet vial	Animalia	Arthropoda	Insecta	Hymenoptera	Formicidae	Mayaponera	constricta	Mayaponera constricta (Mayr, 1884)	(Mayr, 1884)	Species	Ant	Fernandes, I.O. | Souza, J.L.P.	1	Individual
PreservedSpecimen	IlhaBúfalos:km2:2011:1	2017-09-13	Invertebrate Collection of INPA / Environmental monitoring of ants (Hymenoptera: Formicidae) in the influence areas of Santo Antônio Hydroelectric Power-Plant in Rondônia, Brazil		en	Instituto Nacional de Pesquisas da Amazônia (INPA)	INPA		Instituto Nacional de Pesquisas da Amazônia - INPA / Invertebrate Collection		BR:INPA:HYM:000343	Fernandes, I.O. | Souza, J.L.P.		female	adult	non-reprodutcive	alcohol	in collection / wet vial	Animalia	Arthropoda	Insecta	Hymenoptera	Formicidae	Mayaponera	constricta	Mayaponera constricta (Mayr, 1884)	(Mayr, 1884)	Species	Ant	Fernandes, I.O. | Souza, J.L.P.	1	Individual
PreservedSpecimen	Morrinhos:Km3:2011:1	2017-09-13	Invertebrate Collection of INPA / Environmental monitoring of ants (Hymenoptera: Formicidae) in the influence areas of Santo Antônio Hydroelectric Power-Plant in Rondônia, Brazil		en	Instituto Nacional de Pesquisas da Amazônia (INPA)	INPA		Instituto Nacional de Pesquisas da Amazônia - INPA / Invertebrate Collection		BR:INPA:HYM:000344	Fernandes, I.O. | Souza, J.L.P.		female	adult	non-reprodutcive	alcohol	in collection / wet vial	Animalia	Arthropoda	Insecta	Hymenoptera	Formicidae	Mayaponera	constricta	Mayaponera constricta (Mayr, 1884)	(Mayr, 1884)	Species	Ant	Fernandes, I.O. | Souza, J.L.P.	1	Individual
PreservedSpecimen	Jaci-ParanáMD:Km0:2011:1	2017-09-13	Invertebrate Collection of INPA / Environmental monitoring of ants (Hymenoptera: Formicidae) in the influence areas of Santo Antônio Hydroelectric Power-Plant in Rondônia, Brazil		en	Instituto Nacional de Pesquisas da Amazônia (INPA)	INPA		Instituto Nacional de Pesquisas da Amazônia - INPA / Invertebrate Collection		BR:INPA:HYM:000345	Fernandes, I.O. | Souza, J.L.P.		female	adult	non-reprodutcive	alcohol	in collection / wet vial	Animalia	Arthropoda	Insecta	Hymenoptera	Formicidae	Mayaponera	constricta	Mayaponera constricta (Mayr, 1884)	(Mayr, 1884)	Species	Ant	Fernandes, I.O. | Souza, J.L.P.	1	Individual
PreservedSpecimen	Morrinhos:Km0.5:2011:1	2017-09-13	Invertebrate Collection of INPA / Environmental monitoring of ants (Hymenoptera: Formicidae) in the influence areas of Santo Antônio Hydroelectric Power-Plant in Rondônia, Brazil		en	Instituto Nacional de Pesquisas da Amazônia (INPA)	INPA		Instituto Nacional de Pesquisas da Amazônia - INPA / Invertebrate Collection		BR:INPA:HYM:000346	Fernandes, I.O. | Souza, J.L.P.		female	adult	non-reprodutcive	alcohol	in collection / wet vial	Animalia	Arthropoda	Insecta	Hymenoptera	Formicidae	Mayaponera	constricta	Mayaponera constricta (Mayr, 1884)	(Mayr, 1884)	Species	Ant	Fernandes, I.O. | Souza, J.L.P.	1	Individual
PreservedSpecimen	Morrinhos:Km2:2011:1	2017-09-13	Invertebrate Collection of INPA / Environmental monitoring of ants (Hymenoptera: Formicidae) in the influence areas of Santo Antônio Hydroelectric Power-Plant in Rondônia, Brazil		en	Instituto Nacional de Pesquisas da Amazônia (INPA)	INPA		Instituto Nacional de Pesquisas da Amazônia - INPA / Invertebrate Collection		BR:INPA:HYM:000347	Fernandes, I.O. | Souza, J.L.P.		female	adult	non-reprodutcive	alcohol	in collection / wet vial	Animalia	Arthropoda	Insecta	Hymenoptera	Formicidae	Mayaponera	constricta	Mayaponera constricta (Mayr, 1884)	(Mayr, 1884)	Species	Ant	Fernandes, I.O. | Souza, J.L.P.	1	Individual
PreservedSpecimen	IlhaBúfalos:km3:2011:1	2017-09-13	Invertebrate Collection of INPA / Environmental monitoring of ants (Hymenoptera: Formicidae) in the influence areas of Santo Antônio Hydroelectric Power-Plant in Rondônia, Brazil		en	Instituto Nacional de Pesquisas da Amazônia (INPA)	INPA		Instituto Nacional de Pesquisas da Amazônia - INPA / Invertebrate Collection		BR:INPA:HYM:000348	Fernandes, I.O. | Souza, J.L.P.		female	adult	non-reprodutcive	alcohol	in collection / wet vial	Animalia	Arthropoda	Insecta	Hymenoptera	Formicidae	Mayaponera	constricta	Mayaponera constricta (Mayr, 1884)	(Mayr, 1884)	Species	Ant	Fernandes, I.O. | Souza, J.L.P.	1	Individual
PreservedSpecimen	Jaci-ParanáMD:Km4:2011:1	2017-09-13	Invertebrate Collection of INPA / Environmental monitoring of ants (Hymenoptera: Formicidae) in the influence areas of Santo Antônio Hydroelectric Power-Plant in Rondônia, Brazil		en	Instituto Nacional de Pesquisas da Amazônia (INPA)	INPA		Instituto Nacional de Pesquisas da Amazônia - INPA / Invertebrate Collection		BR:INPA:HYM:000349	Fernandes, I.O. | Souza, J.L.P.		female	adult	non-reprodutcive	alcohol	in collection / wet vial	Animalia	Arthropoda	Insecta	Hymenoptera	Formicidae	Mayaponera	constricta	Mayaponera constricta (Mayr, 1884)	(Mayr, 1884)	Species	Ant	Fernandes, I.O. | Souza, J.L.P.	1	Individual
PreservedSpecimen	Morrinhos:Km3:2011:1	2017-09-13	Invertebrate Collection of INPA / Environmental monitoring of ants (Hymenoptera: Formicidae) in the influence areas of Santo Antônio Hydroelectric Power-Plant in Rondônia, Brazil		en	Instituto Nacional de Pesquisas da Amazônia (INPA)	INPA		Instituto Nacional de Pesquisas da Amazônia - INPA / Invertebrate Collection		BR:INPA:HYM:000350	Fernandes, I.O. | Souza, J.L.P.		female	adult	non-reprodutcive	alcohol	in collection / wet vial	Animalia	Arthropoda	Insecta	Hymenoptera	Formicidae	Pachycondyla	harpax	Pachycondyla harpax (Fabricius, 1804)	(Fabricius, 1804)	Species	Ant	Fernandes, I.O. | Souza, J.L.P.	1	Individual
PreservedSpecimen	Morrinhos:Km4:2011:1	2017-09-13	Invertebrate Collection of INPA / Environmental monitoring of ants (Hymenoptera: Formicidae) in the influence areas of Santo Antônio Hydroelectric Power-Plant in Rondônia, Brazil		en	Instituto Nacional de Pesquisas da Amazônia (INPA)	INPA		Instituto Nacional de Pesquisas da Amazônia - INPA / Invertebrate Collection		BR:INPA:HYM:000351	Fernandes, I.O. | Souza, J.L.P.		female	adult	non-reprodutcive	alcohol	in collection / wet vial	Animalia	Arthropoda	Insecta	Hymenoptera	Formicidae	Pachycondyla	harpax	Pachycondyla harpax (Fabricius, 1804)	(Fabricius, 1804)	Species	Ant	Fernandes, I.O. | Souza, J.L.P.	1	Individual
PreservedSpecimen	Morrinhos:Km2:2011:1	2017-09-13	Invertebrate Collection of INPA / Environmental monitoring of ants (Hymenoptera: Formicidae) in the influence areas of Santo Antônio Hydroelectric Power-Plant in Rondônia, Brazil		en	Instituto Nacional de Pesquisas da Amazônia (INPA)	INPA		Instituto Nacional de Pesquisas da Amazônia - INPA / Invertebrate Collection		BR:INPA:HYM:000352	Fernandes, I.O. | Souza, J.L.P.		female	adult	non-reprodutcive	alcohol	in collection / wet vial	Animalia	Arthropoda	Insecta	Hymenoptera	Formicidae	Pachycondyla	harpax	Pachycondyla harpax (Fabricius, 1804)	(Fabricius, 1804)	Species	Ant	Fernandes, I.O. | Souza, J.L.P.	1	Individual
PreservedSpecimen	Morrinhos:Km2:2011:1	2017-09-13	Invertebrate Collection of INPA / Environmental monitoring of ants (Hymenoptera: Formicidae) in the influence areas of Santo Antônio Hydroelectric Power-Plant in Rondônia, Brazil		en	Instituto Nacional de Pesquisas da Amazônia (INPA)	INPA		Instituto Nacional de Pesquisas da Amazônia - INPA / Invertebrate Collection		BR:INPA:HYM:000353	Fernandes, I.O. | Souza, J.L.P.		female	adult	non-reprodutcive	alcohol	in collection / wet vial	Animalia	Arthropoda	Insecta	Hymenoptera	Formicidae	Pachycondyla	harpax	Pachycondyla harpax (Fabricius, 1804)	(Fabricius, 1804)	Species	Ant	Fernandes, I.O. | Souza, J.L.P.	1	Individual
PreservedSpecimen	IlhaPedras:km4:2011:1	2017-09-13	Invertebrate Collection of INPA / Environmental monitoring of ants (Hymenoptera: Formicidae) in the influence areas of Santo Antônio Hydroelectric Power-Plant in Rondônia, Brazil		en	Instituto Nacional de Pesquisas da Amazônia (INPA)	INPA		Instituto Nacional de Pesquisas da Amazônia - INPA / Invertebrate Collection		BR:INPA:HYM:000354	Fernandes, I.O. | Souza, J.L.P.		female	adult	non-reprodutcive	alcohol	in collection / wet vial	Animalia	Arthropoda	Insecta	Hymenoptera	Formicidae	Pachycondyla	impressa	Pachycondyla impressa (Roger, 1861)	(Roger, 1861)	Species	Ant	Fernandes, I.O. | Souza, J.L.P.	1	Individual
PreservedSpecimen	IlhaBúfalos:km1:2011:1	2017-09-13	Invertebrate Collection of INPA / Environmental monitoring of ants (Hymenoptera: Formicidae) in the influence areas of Santo Antônio Hydroelectric Power-Plant in Rondônia, Brazil		en	Instituto Nacional de Pesquisas da Amazônia (INPA)	INPA		Instituto Nacional de Pesquisas da Amazônia - INPA / Invertebrate Collection		BR:INPA:HYM:000355	Fernandes, I.O. | Souza, J.L.P.		female	adult	non-reprodutcive	alcohol	in collection / wet vial	Animalia	Arthropoda	Insecta	Hymenoptera	Formicidae	Pachycondyla	impressa	Pachycondyla impressa (Roger, 1861)	(Roger, 1861)	Species	Ant	Fernandes, I.O. | Souza, J.L.P.	1	Individual
PreservedSpecimen	IlhaBúfalos:km1:2011:1	2017-09-13	Invertebrate Collection of INPA / Environmental monitoring of ants (Hymenoptera: Formicidae) in the influence areas of Santo Antônio Hydroelectric Power-Plant in Rondônia, Brazil		en	Instituto Nacional de Pesquisas da Amazônia (INPA)	INPA		Instituto Nacional de Pesquisas da Amazônia - INPA / Invertebrate Collection		BR:INPA:HYM:000356	Fernandes, I.O. | Souza, J.L.P.		female	adult	non-reprodutcive	alcohol	in collection / wet vial	Animalia	Arthropoda	Insecta	Hymenoptera	Formicidae	Pachycondyla	impressa	Pachycondyla impressa (Roger, 1861)	(Roger, 1861)	Species	Ant	Fernandes, I.O. | Souza, J.L.P.	1	Individual
PreservedSpecimen	IlhaPedras:km2:2011:1	2017-09-13	Invertebrate Collection of INPA / Environmental monitoring of ants (Hymenoptera: Formicidae) in the influence areas of Santo Antônio Hydroelectric Power-Plant in Rondônia, Brazil		en	Instituto Nacional de Pesquisas da Amazônia (INPA)	INPA		Instituto Nacional de Pesquisas da Amazônia - INPA / Invertebrate Collection		BR:INPA:HYM:000357	Fernandes, I.O. | Souza, J.L.P.		female	adult	non-reprodutcive	alcohol	in collection / wet vial	Animalia	Arthropoda	Insecta	Hymenoptera	Formicidae	Pseudoponera	stigma	Pseudoponera stigma (Fabricius, 1804)	(Fabricius, 1804)	Species	Ant	Fernandes, I.O. | Souza, J.L.P.	1	Individual
PreservedSpecimen	IlhaBúfalos:km2:2011:1	2017-09-13	Invertebrate Collection of INPA / Environmental monitoring of ants (Hymenoptera: Formicidae) in the influence areas of Santo Antônio Hydroelectric Power-Plant in Rondônia, Brazil		en	Instituto Nacional de Pesquisas da Amazônia (INPA)	INPA		Instituto Nacional de Pesquisas da Amazônia - INPA / Invertebrate Collection		BR:INPA:HYM:000358	Fernandes, I.O. | Souza, J.L.P.		female	adult	non-reprodutcive	alcohol	in collection / wet vial	Animalia	Arthropoda	Insecta	Hymenoptera	Formicidae	Pseudoponera	stigma	Pseudoponera stigma (Fabricius, 1804)	(Fabricius, 1804)	Species	Ant	Fernandes, I.O. | Souza, J.L.P.	1	Individual
PreservedSpecimen	Jaci-ParanáMD:Km3:2011:1	2017-09-13	Invertebrate Collection of INPA / Environmental monitoring of ants (Hymenoptera: Formicidae) in the influence areas of Santo Antônio Hydroelectric Power-Plant in Rondônia, Brazil		en	Instituto Nacional de Pesquisas da Amazônia (INPA)	INPA		Instituto Nacional de Pesquisas da Amazônia - INPA / Invertebrate Collection		BR:INPA:HYM:000359	Fernandes, I.O. | Souza, J.L.P.		female	adult	non-reprodutcive	alcohol	in collection / wet vial	Animalia	Arthropoda	Insecta	Hymenoptera	Formicidae	Pseudoponera	stigma	Pseudoponera stigma (Fabricius, 1804)	(Fabricius, 1804)	Species	Ant	Fernandes, I.O. | Souza, J.L.P.	1	Individual
PreservedSpecimen	Jaci-ParanáMD:Km3:2011:1	2017-09-13	Invertebrate Collection of INPA / Environmental monitoring of ants (Hymenoptera: Formicidae) in the influence areas of Santo Antônio Hydroelectric Power-Plant in Rondônia, Brazil		en	Instituto Nacional de Pesquisas da Amazônia (INPA)	INPA		Instituto Nacional de Pesquisas da Amazônia - INPA / Invertebrate Collection		BR:INPA:HYM:000360	Fernandes, I.O. | Souza, J.L.P.		female	adult	non-reprodutcive	alcohol	in collection / wet vial	Animalia	Arthropoda	Insecta	Hymenoptera	Formicidae	Pseudoponera	stigma	Pseudoponera stigma (Fabricius, 1804)	(Fabricius, 1804)	Species	Ant	Fernandes, I.O. | Souza, J.L.P.	1	Individual
PreservedSpecimen	IlhaPedras:km3:2011:1	2017-09-13	Invertebrate Collection of INPA / Environmental monitoring of ants (Hymenoptera: Formicidae) in the influence areas of Santo Antônio Hydroelectric Power-Plant in Rondônia, Brazil		en	Instituto Nacional de Pesquisas da Amazônia (INPA)	INPA		Instituto Nacional de Pesquisas da Amazônia - INPA / Invertebrate Collection		BR:INPA:HYM:000361	Fernandes, I.O. | Souza, J.L.P.		female	adult	non-reprodutcive	alcohol	in collection / wet vial	Animalia	Arthropoda	Insecta	Hymenoptera	Formicidae	Pachycondyla	striata	Pachycondyla striata Smith, 1858	Smith, 1858	Species	Ant	Fernandes, I.O. | Souza, J.L.P.	1	Individual
PreservedSpecimen	IlhaPedras:km2:2011:1	2017-09-13	Invertebrate Collection of INPA / Environmental monitoring of ants (Hymenoptera: Formicidae) in the influence areas of Santo Antônio Hydroelectric Power-Plant in Rondônia, Brazil		en	Instituto Nacional de Pesquisas da Amazônia (INPA)	INPA		Instituto Nacional de Pesquisas da Amazônia - INPA / Invertebrate Collection		BR:INPA:HYM:000362	Fernandes, I.O. | Souza, J.L.P.		female	adult	non-reprodutcive	alcohol	in collection / wet vial	Animalia	Arthropoda	Insecta	Hymenoptera	Formicidae	Pachycondyla	striata	Pachycondyla striata Smith, 1858	Smith, 1858	Species	Ant	Fernandes, I.O. | Souza, J.L.P.	1	Individual
PreservedSpecimen	Jaci-ParanáMD:Km1:2011:1	2017-09-13	Invertebrate Collection of INPA / Environmental monitoring of ants (Hymenoptera: Formicidae) in the influence areas of Santo Antônio Hydroelectric Power-Plant in Rondônia, Brazil		en	Instituto Nacional de Pesquisas da Amazônia (INPA)	INPA		Instituto Nacional de Pesquisas da Amazônia - INPA / Invertebrate Collection		BR:INPA:HYM:000363	Fernandes, I.O. | Souza, J.L.P.		female	adult	non-reprodutcive	alcohol	in collection / wet vial	Animalia	Arthropoda	Insecta	Hymenoptera	Formicidae	Pachycondyla	striata	Pachycondyla striata Smith, 1858	Smith, 1858	Species	Ant	Fernandes, I.O. | Souza, J.L.P.	1	Individual
PreservedSpecimen	Jaci-ParanáMD:Km0:2011:1	2017-09-13	Invertebrate Collection of INPA / Environmental monitoring of ants (Hymenoptera: Formicidae) in the influence areas of Santo Antônio Hydroelectric Power-Plant in Rondônia, Brazil		en	Instituto Nacional de Pesquisas da Amazônia (INPA)	INPA		Instituto Nacional de Pesquisas da Amazônia - INPA / Invertebrate Collection		BR:INPA:HYM:000364	Fernandes, I.O. | Souza, J.L.P.		female	adult	non-reprodutcive	alcohol	in collection / wet vial	Animalia	Arthropoda	Insecta	Hymenoptera	Formicidae	Pachycondyla	striata	Pachycondyla striata Smith, 1858	Smith, 1858	Species	Ant	Fernandes, I.O. | Souza, J.L.P.	1	Individual
PreservedSpecimen	Jaci-ParanáMD:Km2:2011:1	2017-09-13	Invertebrate Collection of INPA / Environmental monitoring of ants (Hymenoptera: Formicidae) in the influence areas of Santo Antônio Hydroelectric Power-Plant in Rondônia, Brazil		en	Instituto Nacional de Pesquisas da Amazônia (INPA)	INPA		Instituto Nacional de Pesquisas da Amazônia - INPA / Invertebrate Collection		BR:INPA:HYM:000365	Fernandes, I.O. | Souza, J.L.P.		female	adult	non-reprodutcive	alcohol	in collection / wet vial	Animalia	Arthropoda	Insecta	Hymenoptera	Formicidae	Pachycondyla	striata	Pachycondyla striata Smith, 1858	Smith, 1858	Species	Ant	Fernandes, I.O. | Souza, J.L.P.	1	Individual
PreservedSpecimen	IlhaPedras:km3:2011:1	2017-09-13	Invertebrate Collection of INPA / Environmental monitoring of ants (Hymenoptera: Formicidae) in the influence areas of Santo Antônio Hydroelectric Power-Plant in Rondônia, Brazil		en	Instituto Nacional de Pesquisas da Amazônia (INPA)	INPA		Instituto Nacional de Pesquisas da Amazônia - INPA / Invertebrate Collection		BR:INPA:HYM:000366	Fernandes, I.O. | Souza, J.L.P.		female	adult	non-reprodutcive	alcohol	in collection / wet vial	Animalia	Arthropoda	Insecta	Hymenoptera	Formicidae	Pheidole		Pheidole Westwood, 1839	Westwood, 1839	Genus	Ant	Fernandes, I.O. | Souza, J.L.P.	1	Individual
PreservedSpecimen	IlhaBúfalos:km0:2011:1	2017-09-13	Invertebrate Collection of INPA / Environmental monitoring of ants (Hymenoptera: Formicidae) in the influence areas of Santo Antônio Hydroelectric Power-Plant in Rondônia, Brazil		en	Instituto Nacional de Pesquisas da Amazônia (INPA)	INPA		Instituto Nacional de Pesquisas da Amazônia - INPA / Invertebrate Collection		BR:INPA:HYM:000367	Fernandes, I.O. | Souza, J.L.P.		female	adult	non-reprodutcive	alcohol	in collection / wet vial	Animalia	Arthropoda	Insecta	Hymenoptera	Formicidae	Pheidole		Pheidole Westwood, 1839	Westwood, 1839	Genus	Ant	Fernandes, I.O. | Souza, J.L.P.	1	Individual
PreservedSpecimen	Morrinhos:Km1:2011:1	2017-09-13	Invertebrate Collection of INPA / Environmental monitoring of ants (Hymenoptera: Formicidae) in the influence areas of Santo Antônio Hydroelectric Power-Plant in Rondônia, Brazil		en	Instituto Nacional de Pesquisas da Amazônia (INPA)	INPA		Instituto Nacional de Pesquisas da Amazônia - INPA / Invertebrate Collection		BR:INPA:HYM:000368	Fernandes, I.O. | Souza, J.L.P.		female	adult	non-reprodutcive	alcohol	in collection / wet vial	Animalia	Arthropoda	Insecta	Hymenoptera	Formicidae	Pheidole		Pheidole Westwood, 1839	Westwood, 1839	Genus	Ant	Fernandes, I.O. | Souza, J.L.P.	1	Individual
PreservedSpecimen	Jaci-ParanáMD:Km3:2011:1	2017-09-13	Invertebrate Collection of INPA / Environmental monitoring of ants (Hymenoptera: Formicidae) in the influence areas of Santo Antônio Hydroelectric Power-Plant in Rondônia, Brazil		en	Instituto Nacional de Pesquisas da Amazônia (INPA)	INPA		Instituto Nacional de Pesquisas da Amazônia - INPA / Invertebrate Collection		BR:INPA:HYM:000369	Fernandes, I.O. | Souza, J.L.P.		female	adult	non-reprodutcive	alcohol	in collection / wet vial	Animalia	Arthropoda	Insecta	Hymenoptera	Formicidae	Pheidole		Pheidole Westwood, 1839	Westwood, 1839	Genus	Ant	Fernandes, I.O. | Souza, J.L.P.	1	Individual
PreservedSpecimen	IlhaBúfalos:km0:2011:1	2017-09-13	Invertebrate Collection of INPA / Environmental monitoring of ants (Hymenoptera: Formicidae) in the influence areas of Santo Antônio Hydroelectric Power-Plant in Rondônia, Brazil		en	Instituto Nacional de Pesquisas da Amazônia (INPA)	INPA		Instituto Nacional de Pesquisas da Amazônia - INPA / Invertebrate Collection		BR:INPA:HYM:000370	Fernandes, I.O. | Souza, J.L.P.		female	adult	non-reprodutcive	alcohol	in collection / wet vial	Animalia	Arthropoda	Insecta	Hymenoptera	Formicidae	Pheidole		Pheidole Westwood, 1839	Westwood, 1839	Genus	Ant	Fernandes, I.O. | Souza, J.L.P.	1	Individual
PreservedSpecimen	IlhaPedras:km0.5:2011:1	2017-09-13	Invertebrate Collection of INPA / Environmental monitoring of ants (Hymenoptera: Formicidae) in the influence areas of Santo Antônio Hydroelectric Power-Plant in Rondônia, Brazil		en	Instituto Nacional de Pesquisas da Amazônia (INPA)	INPA		Instituto Nacional de Pesquisas da Amazônia - INPA / Invertebrate Collection		BR:INPA:HYM:000371	Fernandes, I.O. | Souza, J.L.P.		female	adult	non-reprodutcive	alcohol	in collection / wet vial	Animalia	Arthropoda	Insecta	Hymenoptera	Formicidae	Pheidole		Pheidole Westwood, 1839	Westwood, 1839	Genus	Ant	Fernandes, I.O. | Souza, J.L.P.	1	Individual
PreservedSpecimen	IlhaBúfalos:km0:2011:1	2017-09-13	Invertebrate Collection of INPA / Environmental monitoring of ants (Hymenoptera: Formicidae) in the influence areas of Santo Antônio Hydroelectric Power-Plant in Rondônia, Brazil		en	Instituto Nacional de Pesquisas da Amazônia (INPA)	INPA		Instituto Nacional de Pesquisas da Amazônia - INPA / Invertebrate Collection		BR:INPA:HYM:000372	Fernandes, I.O. | Souza, J.L.P.		female	adult	non-reprodutcive	alcohol	in collection / wet vial	Animalia	Arthropoda	Insecta	Hymenoptera	Formicidae	Pheidole		Pheidole Westwood, 1839	Westwood, 1839	Genus	Ant	Fernandes, I.O. | Souza, J.L.P.	1	Individual
PreservedSpecimen	Morrinhos:Km0:2011:1	2017-09-13	Invertebrate Collection of INPA / Environmental monitoring of ants (Hymenoptera: Formicidae) in the influence areas of Santo Antônio Hydroelectric Power-Plant in Rondônia, Brazil		en	Instituto Nacional de Pesquisas da Amazônia (INPA)	INPA		Instituto Nacional de Pesquisas da Amazônia - INPA / Invertebrate Collection		BR:INPA:HYM:000373	Fernandes, I.O. | Souza, J.L.P.		female	adult	non-reprodutcive	alcohol	in collection / wet vial	Animalia	Arthropoda	Insecta	Hymenoptera	Formicidae	Pheidole		Pheidole Westwood, 1839	Westwood, 1839	Genus	Ant	Fernandes, I.O. | Souza, J.L.P.	1	Individual
PreservedSpecimen	IlhaBúfalos:km0.5:2011:1	2017-09-13	Invertebrate Collection of INPA / Environmental monitoring of ants (Hymenoptera: Formicidae) in the influence areas of Santo Antônio Hydroelectric Power-Plant in Rondônia, Brazil		en	Instituto Nacional de Pesquisas da Amazônia (INPA)	INPA		Instituto Nacional de Pesquisas da Amazônia - INPA / Invertebrate Collection		BR:INPA:HYM:000374	Fernandes, I.O. | Souza, J.L.P.		female	adult	non-reprodutcive	alcohol	in collection / wet vial	Animalia	Arthropoda	Insecta	Hymenoptera	Formicidae	Pheidole		Pheidole Westwood, 1839	Westwood, 1839	Genus	Ant	Fernandes, I.O. | Souza, J.L.P.	1	Individual
PreservedSpecimen	Morrinhos:Km0.5:2011:1	2017-09-13	Invertebrate Collection of INPA / Environmental monitoring of ants (Hymenoptera: Formicidae) in the influence areas of Santo Antônio Hydroelectric Power-Plant in Rondônia, Brazil		en	Instituto Nacional de Pesquisas da Amazônia (INPA)	INPA		Instituto Nacional de Pesquisas da Amazônia - INPA / Invertebrate Collection		BR:INPA:HYM:000375	Fernandes, I.O. | Souza, J.L.P.		female	adult	non-reprodutcive	alcohol	in collection / wet vial	Animalia	Arthropoda	Insecta	Hymenoptera	Formicidae	Pheidole		Pheidole Westwood, 1839	Westwood, 1839	Genus	Ant	Fernandes, I.O. | Souza, J.L.P.	1	Individual
PreservedSpecimen	IlhaBúfalos:Km3:2011:2	2017-09-13	Invertebrate Collection of INPA / Environmental monitoring of ants (Hymenoptera: Formicidae) in the influence areas of Santo Antônio Hydroelectric Power-Plant in Rondônia, Brazil		en	Instituto Nacional de Pesquisas da Amazônia (INPA)	INPA		Instituto Nacional de Pesquisas da Amazônia - INPA / Invertebrate Collection		BR:INPA:HYM:000376	Fernandes, I.O. | Souza, J.L.P.		female	adult	non-reprodutcive	alcohol	in collection / wet vial	Animalia	Arthropoda	Insecta	Hymenoptera	Formicidae	Pheidole		Pheidole Westwood, 1839	Westwood, 1839	Genus	Ant	Fernandes, I.O. | Souza, J.L.P.	1	Individual
PreservedSpecimen	IlhaBúfalos:km3:2011:1	2017-09-13	Invertebrate Collection of INPA / Environmental monitoring of ants (Hymenoptera: Formicidae) in the influence areas of Santo Antônio Hydroelectric Power-Plant in Rondônia, Brazil		en	Instituto Nacional de Pesquisas da Amazônia (INPA)	INPA		Instituto Nacional de Pesquisas da Amazônia - INPA / Invertebrate Collection		BR:INPA:HYM:000377	Fernandes, I.O. | Souza, J.L.P.		female	adult	non-reprodutcive	alcohol	in collection / wet vial	Animalia	Arthropoda	Insecta	Hymenoptera	Formicidae	Pheidole		Pheidole Westwood, 1839	Westwood, 1839	Genus	Ant	Fernandes, I.O. | Souza, J.L.P.	1	Individual
PreservedSpecimen	Morrinhos:Km3:2011:1	2017-09-13	Invertebrate Collection of INPA / Environmental monitoring of ants (Hymenoptera: Formicidae) in the influence areas of Santo Antônio Hydroelectric Power-Plant in Rondônia, Brazil		en	Instituto Nacional de Pesquisas da Amazônia (INPA)	INPA		Instituto Nacional de Pesquisas da Amazônia - INPA / Invertebrate Collection		BR:INPA:HYM:000378	Fernandes, I.O. | Souza, J.L.P.		female	adult	non-reprodutcive	alcohol	in collection / wet vial	Animalia	Arthropoda	Insecta	Hymenoptera	Formicidae	Pheidole		Pheidole Westwood, 1839	Westwood, 1839	Genus	Ant	Fernandes, I.O. | Souza, J.L.P.	1	Individual
PreservedSpecimen	IlhaPedras:km4:2011:1	2017-09-13	Invertebrate Collection of INPA / Environmental monitoring of ants (Hymenoptera: Formicidae) in the influence areas of Santo Antônio Hydroelectric Power-Plant in Rondônia, Brazil		en	Instituto Nacional de Pesquisas da Amazônia (INPA)	INPA		Instituto Nacional de Pesquisas da Amazônia - INPA / Invertebrate Collection		BR:INPA:HYM:000379	Fernandes, I.O. | Souza, J.L.P.		female	adult	non-reprodutcive	alcohol	in collection / wet vial	Animalia	Arthropoda	Insecta	Hymenoptera	Formicidae	Pheidole		Pheidole Westwood, 1839	Westwood, 1839	Genus	Ant	Fernandes, I.O. | Souza, J.L.P.	1	Individual
PreservedSpecimen	IlhaPedras:km4:2011:1	2017-09-13	Invertebrate Collection of INPA / Environmental monitoring of ants (Hymenoptera: Formicidae) in the influence areas of Santo Antônio Hydroelectric Power-Plant in Rondônia, Brazil		en	Instituto Nacional de Pesquisas da Amazônia (INPA)	INPA		Instituto Nacional de Pesquisas da Amazônia - INPA / Invertebrate Collection		BR:INPA:HYM:000380	Fernandes, I.O. | Souza, J.L.P.		female	adult	non-reprodutcive	alcohol	in collection / wet vial	Animalia	Arthropoda	Insecta	Hymenoptera	Formicidae	Pheidole		Pheidole Westwood, 1839	Westwood, 1839	Genus	Ant	Fernandes, I.O. | Souza, J.L.P.	1	Individual
PreservedSpecimen	IlhaPedras:km2:2011:1	2017-09-13	Invertebrate Collection of INPA / Environmental monitoring of ants (Hymenoptera: Formicidae) in the influence areas of Santo Antônio Hydroelectric Power-Plant in Rondônia, Brazil		en	Instituto Nacional de Pesquisas da Amazônia (INPA)	INPA		Instituto Nacional de Pesquisas da Amazônia - INPA / Invertebrate Collection		BR:INPA:HYM:000381	Fernandes, I.O. | Souza, J.L.P.		female	adult	non-reprodutcive	alcohol	in collection / wet vial	Animalia	Arthropoda	Insecta	Hymenoptera	Formicidae	Pheidole		Pheidole Westwood, 1839	Westwood, 1839	Genus	Ant	Fernandes, I.O. | Souza, J.L.P.	1	Individual
PreservedSpecimen	IlhaPedras:km3:2011:1	2017-09-13	Invertebrate Collection of INPA / Environmental monitoring of ants (Hymenoptera: Formicidae) in the influence areas of Santo Antônio Hydroelectric Power-Plant in Rondônia, Brazil		en	Instituto Nacional de Pesquisas da Amazônia (INPA)	INPA		Instituto Nacional de Pesquisas da Amazônia - INPA / Invertebrate Collection		BR:INPA:HYM:000382	Fernandes, I.O. | Souza, J.L.P.		female	adult	non-reprodutcive	alcohol	in collection / wet vial	Animalia	Arthropoda	Insecta	Hymenoptera	Formicidae	Pheidole		Pheidole Westwood, 1839	Westwood, 1839	Genus	Ant	Fernandes, I.O. | Souza, J.L.P.	1	Individual
PreservedSpecimen	IlhaPedras:km3:2011:1	2017-09-13	Invertebrate Collection of INPA / Environmental monitoring of ants (Hymenoptera: Formicidae) in the influence areas of Santo Antônio Hydroelectric Power-Plant in Rondônia, Brazil		en	Instituto Nacional de Pesquisas da Amazônia (INPA)	INPA		Instituto Nacional de Pesquisas da Amazônia - INPA / Invertebrate Collection		BR:INPA:HYM:000383	Fernandes, I.O. | Souza, J.L.P.		female	adult	non-reprodutcive	alcohol	in collection / wet vial	Animalia	Arthropoda	Insecta	Hymenoptera	Formicidae	Pheidole		Pheidole Westwood, 1839	Westwood, 1839	Genus	Ant	Fernandes, I.O. | Souza, J.L.P.	1	Individual
PreservedSpecimen	IlhaPedras:km2:2011:1	2017-09-13	Invertebrate Collection of INPA / Environmental monitoring of ants (Hymenoptera: Formicidae) in the influence areas of Santo Antônio Hydroelectric Power-Plant in Rondônia, Brazil		en	Instituto Nacional de Pesquisas da Amazônia (INPA)	INPA		Instituto Nacional de Pesquisas da Amazônia - INPA / Invertebrate Collection		BR:INPA:HYM:000384	Fernandes, I.O. | Souza, J.L.P.		female	adult	non-reprodutcive	alcohol	in collection / wet vial	Animalia	Arthropoda	Insecta	Hymenoptera	Formicidae	Pheidole		Pheidole Westwood, 1839	Westwood, 1839	Genus	Ant	Fernandes, I.O. | Souza, J.L.P.	1	Individual
PreservedSpecimen	IlhaPedras:km2:2011:1	2017-09-13	Invertebrate Collection of INPA / Environmental monitoring of ants (Hymenoptera: Formicidae) in the influence areas of Santo Antônio Hydroelectric Power-Plant in Rondônia, Brazil		en	Instituto Nacional de Pesquisas da Amazônia (INPA)	INPA		Instituto Nacional de Pesquisas da Amazônia - INPA / Invertebrate Collection		BR:INPA:HYM:000385	Fernandes, I.O. | Souza, J.L.P.		female	adult	non-reprodutcive	alcohol	in collection / wet vial	Animalia	Arthropoda	Insecta	Hymenoptera	Formicidae	Pheidole		Pheidole Westwood, 1839	Westwood, 1839	Genus	Ant	Fernandes, I.O. | Souza, J.L.P.	1	Individual
PreservedSpecimen	IlhaPedras:km3:2011:1	2017-09-13	Invertebrate Collection of INPA / Environmental monitoring of ants (Hymenoptera: Formicidae) in the influence areas of Santo Antônio Hydroelectric Power-Plant in Rondônia, Brazil		en	Instituto Nacional de Pesquisas da Amazônia (INPA)	INPA		Instituto Nacional de Pesquisas da Amazônia - INPA / Invertebrate Collection		BR:INPA:HYM:000386	Fernandes, I.O. | Souza, J.L.P.		female	adult	non-reprodutcive	alcohol	in collection / wet vial	Animalia	Arthropoda	Insecta	Hymenoptera	Formicidae	Pheidole		Pheidole Westwood, 1839	Westwood, 1839	Genus	Ant	Fernandes, I.O. | Souza, J.L.P.	1	Individual
PreservedSpecimen	Morrinhos:Km0.5:2011:1	2017-09-13	Invertebrate Collection of INPA / Environmental monitoring of ants (Hymenoptera: Formicidae) in the influence areas of Santo Antônio Hydroelectric Power-Plant in Rondônia, Brazil		en	Instituto Nacional de Pesquisas da Amazônia (INPA)	INPA		Instituto Nacional de Pesquisas da Amazônia - INPA / Invertebrate Collection		BR:INPA:HYM:000387	Fernandes, I.O. | Souza, J.L.P.		female	adult	non-reprodutcive	alcohol	in collection / wet vial	Animalia	Arthropoda	Insecta	Hymenoptera	Formicidae	Pheidole		Pheidole Westwood, 1839	Westwood, 1839	Genus	Ant	Fernandes, I.O. | Souza, J.L.P.	1	Individual
PreservedSpecimen	IlhaBúfalos:km1:2011:1	2017-09-13	Invertebrate Collection of INPA / Environmental monitoring of ants (Hymenoptera: Formicidae) in the influence areas of Santo Antônio Hydroelectric Power-Plant in Rondônia, Brazil		en	Instituto Nacional de Pesquisas da Amazônia (INPA)	INPA		Instituto Nacional de Pesquisas da Amazônia - INPA / Invertebrate Collection		BR:INPA:HYM:000388	Fernandes, I.O. | Souza, J.L.P.		female	adult	non-reprodutcive	alcohol	in collection / wet vial	Animalia	Arthropoda	Insecta	Hymenoptera	Formicidae	Pheidole		Pheidole Westwood, 1839	Westwood, 1839	Genus	Ant	Fernandes, I.O. | Souza, J.L.P.	1	Individual
PreservedSpecimen	IlhaPedras:km1:2011:1	2017-09-13	Invertebrate Collection of INPA / Environmental monitoring of ants (Hymenoptera: Formicidae) in the influence areas of Santo Antônio Hydroelectric Power-Plant in Rondônia, Brazil		en	Instituto Nacional de Pesquisas da Amazônia (INPA)	INPA		Instituto Nacional de Pesquisas da Amazônia - INPA / Invertebrate Collection		BR:INPA:HYM:000389	Fernandes, I.O. | Souza, J.L.P.		female	adult	non-reprodutcive	alcohol	in collection / wet vial	Animalia	Arthropoda	Insecta	Hymenoptera	Formicidae	Pheidole		Pheidole Westwood, 1839	Westwood, 1839	Genus	Ant	Fernandes, I.O. | Souza, J.L.P.	1	Individual
PreservedSpecimen	Morrinhos:Km1:2011:1	2017-09-13	Invertebrate Collection of INPA / Environmental monitoring of ants (Hymenoptera: Formicidae) in the influence areas of Santo Antônio Hydroelectric Power-Plant in Rondônia, Brazil		en	Instituto Nacional de Pesquisas da Amazônia (INPA)	INPA		Instituto Nacional de Pesquisas da Amazônia - INPA / Invertebrate Collection		BR:INPA:HYM:000390	Fernandes, I.O. | Souza, J.L.P.		female	adult	non-reprodutcive	alcohol	in collection / wet vial	Animalia	Arthropoda	Insecta	Hymenoptera	Formicidae	Pheidole		Pheidole Westwood, 1839	Westwood, 1839	Genus	Ant	Fernandes, I.O. | Souza, J.L.P.	1	Individual
PreservedSpecimen	IlhaPedras:km2:2011:1	2017-09-13	Invertebrate Collection of INPA / Environmental monitoring of ants (Hymenoptera: Formicidae) in the influence areas of Santo Antônio Hydroelectric Power-Plant in Rondônia, Brazil		en	Instituto Nacional de Pesquisas da Amazônia (INPA)	INPA		Instituto Nacional de Pesquisas da Amazônia - INPA / Invertebrate Collection		BR:INPA:HYM:000391	Fernandes, I.O. | Souza, J.L.P.		female	adult	non-reprodutcive	alcohol	in collection / wet vial	Animalia	Arthropoda	Insecta	Hymenoptera	Formicidae	Pheidole		Pheidole Westwood, 1839	Westwood, 1839	Genus	Ant	Fernandes, I.O. | Souza, J.L.P.	1	Individual
PreservedSpecimen	IlhaBúfalos:km3:2011:1	2017-09-13	Invertebrate Collection of INPA / Environmental monitoring of ants (Hymenoptera: Formicidae) in the influence areas of Santo Antônio Hydroelectric Power-Plant in Rondônia, Brazil		en	Instituto Nacional de Pesquisas da Amazônia (INPA)	INPA		Instituto Nacional de Pesquisas da Amazônia - INPA / Invertebrate Collection		BR:INPA:HYM:000392	Fernandes, I.O. | Souza, J.L.P.		female	adult	non-reprodutcive	alcohol	in collection / wet vial	Animalia	Arthropoda	Insecta	Hymenoptera	Formicidae	Pheidole		Pheidole Westwood, 1839	Westwood, 1839	Genus	Ant	Fernandes, I.O. | Souza, J.L.P.	1	Individual
PreservedSpecimen	Morrinhos:Km3:2011:1	2017-09-13	Invertebrate Collection of INPA / Environmental monitoring of ants (Hymenoptera: Formicidae) in the influence areas of Santo Antônio Hydroelectric Power-Plant in Rondônia, Brazil		en	Instituto Nacional de Pesquisas da Amazônia (INPA)	INPA		Instituto Nacional de Pesquisas da Amazônia - INPA / Invertebrate Collection		BR:INPA:HYM:000393	Fernandes, I.O. | Souza, J.L.P.		female	adult	non-reprodutcive	alcohol	in collection / wet vial	Animalia	Arthropoda	Insecta	Hymenoptera	Formicidae	Pheidole		Pheidole Westwood, 1839	Westwood, 1839	Genus	Ant	Fernandes, I.O. | Souza, J.L.P.	1	Individual
PreservedSpecimen	Jaci-ParanáMD:Km4:2011:1	2017-09-13	Invertebrate Collection of INPA / Environmental monitoring of ants (Hymenoptera: Formicidae) in the influence areas of Santo Antônio Hydroelectric Power-Plant in Rondônia, Brazil		en	Instituto Nacional de Pesquisas da Amazônia (INPA)	INPA		Instituto Nacional de Pesquisas da Amazônia - INPA / Invertebrate Collection		BR:INPA:HYM:000394	Fernandes, I.O. | Souza, J.L.P.		female	adult	non-reprodutcive	alcohol	in collection / wet vial	Animalia	Arthropoda	Insecta	Hymenoptera	Formicidae	Pheidole		Pheidole Westwood, 1839	Westwood, 1839	Genus	Ant	Fernandes, I.O. | Souza, J.L.P.	1	Individual
PreservedSpecimen	Morrinhos:Km4:2011:1	2017-09-13	Invertebrate Collection of INPA / Environmental monitoring of ants (Hymenoptera: Formicidae) in the influence areas of Santo Antônio Hydroelectric Power-Plant in Rondônia, Brazil		en	Instituto Nacional de Pesquisas da Amazônia (INPA)	INPA		Instituto Nacional de Pesquisas da Amazônia - INPA / Invertebrate Collection		BR:INPA:HYM:000395	Fernandes, I.O. | Souza, J.L.P.		female	adult	non-reprodutcive	alcohol	in collection / wet vial	Animalia	Arthropoda	Insecta	Hymenoptera	Formicidae	Pheidole		Pheidole Westwood, 1839	Westwood, 1839	Genus	Ant	Fernandes, I.O. | Souza, J.L.P.	1	Individual
PreservedSpecimen	Jaci-ParanáMD:Km0:2011:1	2017-09-13	Invertebrate Collection of INPA / Environmental monitoring of ants (Hymenoptera: Formicidae) in the influence areas of Santo Antônio Hydroelectric Power-Plant in Rondônia, Brazil		en	Instituto Nacional de Pesquisas da Amazônia (INPA)	INPA		Instituto Nacional de Pesquisas da Amazônia - INPA / Invertebrate Collection		BR:INPA:HYM:000396	Fernandes, I.O. | Souza, J.L.P.		female	adult	non-reprodutcive	alcohol	in collection / wet vial	Animalia	Arthropoda	Insecta	Hymenoptera	Formicidae	Pheidole		Pheidole Westwood, 1839	Westwood, 1839	Genus	Ant	Fernandes, I.O. | Souza, J.L.P.	1	Individual
PreservedSpecimen	Morrinhos:Km0:2011:1	2017-09-13	Invertebrate Collection of INPA / Environmental monitoring of ants (Hymenoptera: Formicidae) in the influence areas of Santo Antônio Hydroelectric Power-Plant in Rondônia, Brazil		en	Instituto Nacional de Pesquisas da Amazônia (INPA)	INPA		Instituto Nacional de Pesquisas da Amazônia - INPA / Invertebrate Collection		BR:INPA:HYM:000397	Fernandes, I.O. | Souza, J.L.P.		female	adult	non-reprodutcive	alcohol	in collection / wet vial	Animalia	Arthropoda	Insecta	Hymenoptera	Formicidae	Pheidole		Pheidole Westwood, 1839	Westwood, 1839	Genus	Ant	Fernandes, I.O. | Souza, J.L.P.	1	Individual
PreservedSpecimen	IlhaBúfalos:km0.5:2011:1	2017-09-13	Invertebrate Collection of INPA / Environmental monitoring of ants (Hymenoptera: Formicidae) in the influence areas of Santo Antônio Hydroelectric Power-Plant in Rondônia, Brazil		en	Instituto Nacional de Pesquisas da Amazônia (INPA)	INPA		Instituto Nacional de Pesquisas da Amazônia - INPA / Invertebrate Collection		BR:INPA:HYM:000398	Fernandes, I.O. | Souza, J.L.P.		female	adult	non-reprodutcive	alcohol	in collection / wet vial	Animalia	Arthropoda	Insecta	Hymenoptera	Formicidae	Pheidole		Pheidole Westwood, 1839	Westwood, 1839	Genus	Ant	Fernandes, I.O. | Souza, J.L.P.	1	Individual
PreservedSpecimen	IlhaPedras:km0.5:2011:1	2017-09-13	Invertebrate Collection of INPA / Environmental monitoring of ants (Hymenoptera: Formicidae) in the influence areas of Santo Antônio Hydroelectric Power-Plant in Rondônia, Brazil		en	Instituto Nacional de Pesquisas da Amazônia (INPA)	INPA		Instituto Nacional de Pesquisas da Amazônia - INPA / Invertebrate Collection		BR:INPA:HYM:000399	Fernandes, I.O. | Souza, J.L.P.		female	adult	non-reprodutcive	alcohol	in collection / wet vial	Animalia	Arthropoda	Insecta	Hymenoptera	Formicidae	Pheidole		Pheidole Westwood, 1839	Westwood, 1839	Genus	Ant	Fernandes, I.O. | Souza, J.L.P.	1	Individual
PreservedSpecimen	Morrinhos:Km0.5:2011:1	2017-09-13	Invertebrate Collection of INPA / Environmental monitoring of ants (Hymenoptera: Formicidae) in the influence areas of Santo Antônio Hydroelectric Power-Plant in Rondônia, Brazil		en	Instituto Nacional de Pesquisas da Amazônia (INPA)	INPA		Instituto Nacional de Pesquisas da Amazônia - INPA / Invertebrate Collection		BR:INPA:HYM:000400	Fernandes, I.O. | Souza, J.L.P.		female	adult	non-reprodutcive	alcohol	in collection / wet vial	Animalia	Arthropoda	Insecta	Hymenoptera	Formicidae	Pheidole		Pheidole Westwood, 1839	Westwood, 1839	Genus	Ant	Fernandes, I.O. | Souza, J.L.P.	1	Individual
PreservedSpecimen	IlhaBúfalos:km2:2011:1	2017-09-13	Invertebrate Collection of INPA / Environmental monitoring of ants (Hymenoptera: Formicidae) in the influence areas of Santo Antônio Hydroelectric Power-Plant in Rondônia, Brazil		en	Instituto Nacional de Pesquisas da Amazônia (INPA)	INPA		Instituto Nacional de Pesquisas da Amazônia - INPA / Invertebrate Collection		BR:INPA:HYM:000401	Fernandes, I.O. | Souza, J.L.P.		female	adult	non-reprodutcive	alcohol	in collection / wet vial	Animalia	Arthropoda	Insecta	Hymenoptera	Formicidae	Pheidole		Pheidole Westwood, 1839	Westwood, 1839	Genus	Ant	Fernandes, I.O. | Souza, J.L.P.	1	Individual
PreservedSpecimen	Jaci-ParanáMD:Km2:2011:1	2017-09-13	Invertebrate Collection of INPA / Environmental monitoring of ants (Hymenoptera: Formicidae) in the influence areas of Santo Antônio Hydroelectric Power-Plant in Rondônia, Brazil		en	Instituto Nacional de Pesquisas da Amazônia (INPA)	INPA		Instituto Nacional de Pesquisas da Amazônia - INPA / Invertebrate Collection		BR:INPA:HYM:000402	Fernandes, I.O. | Souza, J.L.P.		female	adult	non-reprodutcive	alcohol	in collection / wet vial	Animalia	Arthropoda	Insecta	Hymenoptera	Formicidae	Pheidole		Pheidole Westwood, 1839	Westwood, 1839	Genus	Ant	Fernandes, I.O. | Souza, J.L.P.	1	Individual
PreservedSpecimen	Morrinhos:Km2:2011:1	2017-09-13	Invertebrate Collection of INPA / Environmental monitoring of ants (Hymenoptera: Formicidae) in the influence areas of Santo Antônio Hydroelectric Power-Plant in Rondônia, Brazil		en	Instituto Nacional de Pesquisas da Amazônia (INPA)	INPA		Instituto Nacional de Pesquisas da Amazônia - INPA / Invertebrate Collection		BR:INPA:HYM:000403	Fernandes, I.O. | Souza, J.L.P.		female	adult	non-reprodutcive	alcohol	in collection / wet vial	Animalia	Arthropoda	Insecta	Hymenoptera	Formicidae	Pheidole		Pheidole Westwood, 1839	Westwood, 1839	Genus	Ant	Fernandes, I.O. | Souza, J.L.P.	1	Individual
PreservedSpecimen	Jaci-ParanáMD:Km3:2011:1	2017-09-13	Invertebrate Collection of INPA / Environmental monitoring of ants (Hymenoptera: Formicidae) in the influence areas of Santo Antônio Hydroelectric Power-Plant in Rondônia, Brazil		en	Instituto Nacional de Pesquisas da Amazônia (INPA)	INPA		Instituto Nacional de Pesquisas da Amazônia - INPA / Invertebrate Collection		BR:INPA:HYM:000404	Fernandes, I.O. | Souza, J.L.P.		female	adult	non-reprodutcive	alcohol	in collection / wet vial	Animalia	Arthropoda	Insecta	Hymenoptera	Formicidae	Pheidole		Pheidole Westwood, 1839	Westwood, 1839	Genus	Ant	Fernandes, I.O. | Souza, J.L.P.	1	Individual
PreservedSpecimen	Morrinhos:Km3:2011:1	2017-09-13	Invertebrate Collection of INPA / Environmental monitoring of ants (Hymenoptera: Formicidae) in the influence areas of Santo Antônio Hydroelectric Power-Plant in Rondônia, Brazil		en	Instituto Nacional de Pesquisas da Amazônia (INPA)	INPA		Instituto Nacional de Pesquisas da Amazônia - INPA / Invertebrate Collection		BR:INPA:HYM:000405	Fernandes, I.O. | Souza, J.L.P.		female	adult	non-reprodutcive	alcohol	in collection / wet vial	Animalia	Arthropoda	Insecta	Hymenoptera	Formicidae	Pheidole		Pheidole Westwood, 1839	Westwood, 1839	Genus	Ant	Fernandes, I.O. | Souza, J.L.P.	1	Individual
PreservedSpecimen	IlhaPedras:km4:2011:1	2017-09-13	Invertebrate Collection of INPA / Environmental monitoring of ants (Hymenoptera: Formicidae) in the influence areas of Santo Antônio Hydroelectric Power-Plant in Rondônia, Brazil		en	Instituto Nacional de Pesquisas da Amazônia (INPA)	INPA		Instituto Nacional de Pesquisas da Amazônia - INPA / Invertebrate Collection		BR:INPA:HYM:000406	Fernandes, I.O. | Souza, J.L.P.		female	adult	non-reprodutcive	alcohol	in collection / wet vial	Animalia	Arthropoda	Insecta	Hymenoptera	Formicidae	Pheidole		Pheidole Westwood, 1839	Westwood, 1839	Genus	Ant	Fernandes, I.O. | Souza, J.L.P.	1	Individual
PreservedSpecimen	Jaci-ParanáMD:Km4:2011:1	2017-09-13	Invertebrate Collection of INPA / Environmental monitoring of ants (Hymenoptera: Formicidae) in the influence areas of Santo Antônio Hydroelectric Power-Plant in Rondônia, Brazil		en	Instituto Nacional de Pesquisas da Amazônia (INPA)	INPA		Instituto Nacional de Pesquisas da Amazônia - INPA / Invertebrate Collection		BR:INPA:HYM:000407	Fernandes, I.O. | Souza, J.L.P.		female	adult	non-reprodutcive	alcohol	in collection / wet vial	Animalia	Arthropoda	Insecta	Hymenoptera	Formicidae	Pheidole		Pheidole Westwood, 1839	Westwood, 1839	Genus	Ant	Fernandes, I.O. | Souza, J.L.P.	1	Individual
PreservedSpecimen	IlhaPedras:km0:2011:1	2017-09-13	Invertebrate Collection of INPA / Environmental monitoring of ants (Hymenoptera: Formicidae) in the influence areas of Santo Antônio Hydroelectric Power-Plant in Rondônia, Brazil		en	Instituto Nacional de Pesquisas da Amazônia (INPA)	INPA		Instituto Nacional de Pesquisas da Amazônia - INPA / Invertebrate Collection		BR:INPA:HYM:000408	Fernandes, I.O. | Souza, J.L.P.		female	adult	non-reprodutcive	alcohol	in collection / wet vial	Animalia	Arthropoda	Insecta	Hymenoptera	Formicidae	Pheidole		Pheidole Westwood, 1839	Westwood, 1839	Genus	Ant	Fernandes, I.O. | Souza, J.L.P.	1	Individual
PreservedSpecimen	IlhaPedras:km0.5:2011:1	2017-09-13	Invertebrate Collection of INPA / Environmental monitoring of ants (Hymenoptera: Formicidae) in the influence areas of Santo Antônio Hydroelectric Power-Plant in Rondônia, Brazil		en	Instituto Nacional de Pesquisas da Amazônia (INPA)	INPA		Instituto Nacional de Pesquisas da Amazônia - INPA / Invertebrate Collection		BR:INPA:HYM:000409	Fernandes, I.O. | Souza, J.L.P.		female	adult	non-reprodutcive	alcohol	in collection / wet vial	Animalia	Arthropoda	Insecta	Hymenoptera	Formicidae	Pheidole		Pheidole Westwood, 1839	Westwood, 1839	Genus	Ant	Fernandes, I.O. | Souza, J.L.P.	1	Individual
PreservedSpecimen	Jaci-ParanáMD:Km0.5:2011:1	2017-09-13	Invertebrate Collection of INPA / Environmental monitoring of ants (Hymenoptera: Formicidae) in the influence areas of Santo Antônio Hydroelectric Power-Plant in Rondônia, Brazil		en	Instituto Nacional de Pesquisas da Amazônia (INPA)	INPA		Instituto Nacional de Pesquisas da Amazônia - INPA / Invertebrate Collection		BR:INPA:HYM:000410	Fernandes, I.O. | Souza, J.L.P.		female	adult	non-reprodutcive	alcohol	in collection / wet vial	Animalia	Arthropoda	Insecta	Hymenoptera	Formicidae	Pheidole		Pheidole Westwood, 1839	Westwood, 1839	Genus	Ant	Fernandes, I.O. | Souza, J.L.P.	1	Individual
PreservedSpecimen	Morrinhos:Km0.5:2011:1	2017-09-13	Invertebrate Collection of INPA / Environmental monitoring of ants (Hymenoptera: Formicidae) in the influence areas of Santo Antônio Hydroelectric Power-Plant in Rondônia, Brazil		en	Instituto Nacional de Pesquisas da Amazônia (INPA)	INPA		Instituto Nacional de Pesquisas da Amazônia - INPA / Invertebrate Collection		BR:INPA:HYM:000411	Fernandes, I.O. | Souza, J.L.P.		female	adult	non-reprodutcive	alcohol	in collection / wet vial	Animalia	Arthropoda	Insecta	Hymenoptera	Formicidae	Pheidole		Pheidole Westwood, 1839	Westwood, 1839	Genus	Ant	Fernandes, I.O. | Souza, J.L.P.	1	Individual
PreservedSpecimen	IlhaBúfalos:km1:2011:1	2017-09-13	Invertebrate Collection of INPA / Environmental monitoring of ants (Hymenoptera: Formicidae) in the influence areas of Santo Antônio Hydroelectric Power-Plant in Rondônia, Brazil		en	Instituto Nacional de Pesquisas da Amazônia (INPA)	INPA		Instituto Nacional de Pesquisas da Amazônia - INPA / Invertebrate Collection		BR:INPA:HYM:000412	Fernandes, I.O. | Souza, J.L.P.		female	adult	non-reprodutcive	alcohol	in collection / wet vial	Animalia	Arthropoda	Insecta	Hymenoptera	Formicidae	Pheidole		Pheidole Westwood, 1839	Westwood, 1839	Genus	Ant	Fernandes, I.O. | Souza, J.L.P.	1	Individual
PreservedSpecimen	IlhaPedras:km1:2011:1	2017-09-13	Invertebrate Collection of INPA / Environmental monitoring of ants (Hymenoptera: Formicidae) in the influence areas of Santo Antônio Hydroelectric Power-Plant in Rondônia, Brazil		en	Instituto Nacional de Pesquisas da Amazônia (INPA)	INPA		Instituto Nacional de Pesquisas da Amazônia - INPA / Invertebrate Collection		BR:INPA:HYM:000413	Fernandes, I.O. | Souza, J.L.P.		female	adult	non-reprodutcive	alcohol	in collection / wet vial	Animalia	Arthropoda	Insecta	Hymenoptera	Formicidae	Pheidole		Pheidole Westwood, 1839	Westwood, 1839	Genus	Ant	Fernandes, I.O. | Souza, J.L.P.	1	Individual
PreservedSpecimen	Jaci-ParanáMD:Km1:2011:1	2017-09-13	Invertebrate Collection of INPA / Environmental monitoring of ants (Hymenoptera: Formicidae) in the influence areas of Santo Antônio Hydroelectric Power-Plant in Rondônia, Brazil		en	Instituto Nacional de Pesquisas da Amazônia (INPA)	INPA		Instituto Nacional de Pesquisas da Amazônia - INPA / Invertebrate Collection		BR:INPA:HYM:000414	Fernandes, I.O. | Souza, J.L.P.		female	adult	non-reprodutcive	alcohol	in collection / wet vial	Animalia	Arthropoda	Insecta	Hymenoptera	Formicidae	Pheidole		Pheidole Westwood, 1839	Westwood, 1839	Genus	Ant	Fernandes, I.O. | Souza, J.L.P.	1	Individual
PreservedSpecimen	Jaci-ParanáMD:Km3:2011:1	2017-09-13	Invertebrate Collection of INPA / Environmental monitoring of ants (Hymenoptera: Formicidae) in the influence areas of Santo Antônio Hydroelectric Power-Plant in Rondônia, Brazil		en	Instituto Nacional de Pesquisas da Amazônia (INPA)	INPA		Instituto Nacional de Pesquisas da Amazônia - INPA / Invertebrate Collection		BR:INPA:HYM:000415	Fernandes, I.O. | Souza, J.L.P.		female	adult	non-reprodutcive	alcohol	in collection / wet vial	Animalia	Arthropoda	Insecta	Hymenoptera	Formicidae	Pheidole		Pheidole Westwood, 1839	Westwood, 1839	Genus	Ant	Fernandes, I.O. | Souza, J.L.P.	1	Individual
PreservedSpecimen	IlhaPedras:km4:2011:1	2017-09-13	Invertebrate Collection of INPA / Environmental monitoring of ants (Hymenoptera: Formicidae) in the influence areas of Santo Antônio Hydroelectric Power-Plant in Rondônia, Brazil		en	Instituto Nacional de Pesquisas da Amazônia (INPA)	INPA		Instituto Nacional de Pesquisas da Amazônia - INPA / Invertebrate Collection		BR:INPA:HYM:000416	Fernandes, I.O. | Souza, J.L.P.		female	adult	non-reprodutcive	alcohol	in collection / wet vial	Animalia	Arthropoda	Insecta	Hymenoptera	Formicidae	Pheidole		Pheidole Westwood, 1839	Westwood, 1839	Genus	Ant	Fernandes, I.O. | Souza, J.L.P.	1	Individual
PreservedSpecimen	Morrinhos:Km4:2011:1	2017-09-13	Invertebrate Collection of INPA / Environmental monitoring of ants (Hymenoptera: Formicidae) in the influence areas of Santo Antônio Hydroelectric Power-Plant in Rondônia, Brazil		en	Instituto Nacional de Pesquisas da Amazônia (INPA)	INPA		Instituto Nacional de Pesquisas da Amazônia - INPA / Invertebrate Collection		BR:INPA:HYM:000417	Fernandes, I.O. | Souza, J.L.P.		female	adult	non-reprodutcive	alcohol	in collection / wet vial	Animalia	Arthropoda	Insecta	Hymenoptera	Formicidae	Pheidole		Pheidole Westwood, 1839	Westwood, 1839	Genus	Ant	Fernandes, I.O. | Souza, J.L.P.	1	Individual
PreservedSpecimen	Morrinhos:Km0:2011:1	2017-09-13	Invertebrate Collection of INPA / Environmental monitoring of ants (Hymenoptera: Formicidae) in the influence areas of Santo Antônio Hydroelectric Power-Plant in Rondônia, Brazil		en	Instituto Nacional de Pesquisas da Amazônia (INPA)	INPA		Instituto Nacional de Pesquisas da Amazônia - INPA / Invertebrate Collection		BR:INPA:HYM:000418	Fernandes, I.O. | Souza, J.L.P.		female	adult	non-reprodutcive	alcohol	in collection / wet vial	Animalia	Arthropoda	Insecta	Hymenoptera	Formicidae	Pheidole		Pheidole Westwood, 1839	Westwood, 1839	Genus	Ant	Fernandes, I.O. | Souza, J.L.P.	1	Individual
PreservedSpecimen	IlhaBúfalos:km0.5:2011:1	2017-09-13	Invertebrate Collection of INPA / Environmental monitoring of ants (Hymenoptera: Formicidae) in the influence areas of Santo Antônio Hydroelectric Power-Plant in Rondônia, Brazil		en	Instituto Nacional de Pesquisas da Amazônia (INPA)	INPA		Instituto Nacional de Pesquisas da Amazônia - INPA / Invertebrate Collection		BR:INPA:HYM:000419	Fernandes, I.O. | Souza, J.L.P.		female	adult	non-reprodutcive	alcohol	in collection / wet vial	Animalia	Arthropoda	Insecta	Hymenoptera	Formicidae	Pheidole		Pheidole Westwood, 1839	Westwood, 1839	Genus	Ant	Fernandes, I.O. | Souza, J.L.P.	1	Individual
PreservedSpecimen	Jaci-ParanáMD:Km0.5:2011:1	2017-09-13	Invertebrate Collection of INPA / Environmental monitoring of ants (Hymenoptera: Formicidae) in the influence areas of Santo Antônio Hydroelectric Power-Plant in Rondônia, Brazil		en	Instituto Nacional de Pesquisas da Amazônia (INPA)	INPA		Instituto Nacional de Pesquisas da Amazônia - INPA / Invertebrate Collection		BR:INPA:HYM:000420	Fernandes, I.O. | Souza, J.L.P.		female	adult	non-reprodutcive	alcohol	in collection / wet vial	Animalia	Arthropoda	Insecta	Hymenoptera	Formicidae	Pheidole		Pheidole Westwood, 1839	Westwood, 1839	Genus	Ant	Fernandes, I.O. | Souza, J.L.P.	1	Individual
PreservedSpecimen	Morrinhos:Km0.5:2011:1	2017-09-13	Invertebrate Collection of INPA / Environmental monitoring of ants (Hymenoptera: Formicidae) in the influence areas of Santo Antônio Hydroelectric Power-Plant in Rondônia, Brazil		en	Instituto Nacional de Pesquisas da Amazônia (INPA)	INPA		Instituto Nacional de Pesquisas da Amazônia - INPA / Invertebrate Collection		BR:INPA:HYM:000421	Fernandes, I.O. | Souza, J.L.P.		female	adult	non-reprodutcive	alcohol	in collection / wet vial	Animalia	Arthropoda	Insecta	Hymenoptera	Formicidae	Pheidole		Pheidole Westwood, 1839	Westwood, 1839	Genus	Ant	Fernandes, I.O. | Souza, J.L.P.	1	Individual
PreservedSpecimen	IlhaBúfalos:km1:2011:1	2017-09-13	Invertebrate Collection of INPA / Environmental monitoring of ants (Hymenoptera: Formicidae) in the influence areas of Santo Antônio Hydroelectric Power-Plant in Rondônia, Brazil		en	Instituto Nacional de Pesquisas da Amazônia (INPA)	INPA		Instituto Nacional de Pesquisas da Amazônia - INPA / Invertebrate Collection		BR:INPA:HYM:000422	Fernandes, I.O. | Souza, J.L.P.		female	adult	non-reprodutcive	alcohol	in collection / wet vial	Animalia	Arthropoda	Insecta	Hymenoptera	Formicidae	Pheidole		Pheidole Westwood, 1839	Westwood, 1839	Genus	Ant	Fernandes, I.O. | Souza, J.L.P.	1	Individual
PreservedSpecimen	IlhaPedras:km1:2011:1	2017-09-13	Invertebrate Collection of INPA / Environmental monitoring of ants (Hymenoptera: Formicidae) in the influence areas of Santo Antônio Hydroelectric Power-Plant in Rondônia, Brazil		en	Instituto Nacional de Pesquisas da Amazônia (INPA)	INPA		Instituto Nacional de Pesquisas da Amazônia - INPA / Invertebrate Collection		BR:INPA:HYM:000423	Fernandes, I.O. | Souza, J.L.P.		female	adult	non-reprodutcive	alcohol	in collection / wet vial	Animalia	Arthropoda	Insecta	Hymenoptera	Formicidae	Pheidole		Pheidole Westwood, 1839	Westwood, 1839	Genus	Ant	Fernandes, I.O. | Souza, J.L.P.	1	Individual
PreservedSpecimen	Jaci-ParanáMD:Km1:2011:1	2017-09-13	Invertebrate Collection of INPA / Environmental monitoring of ants (Hymenoptera: Formicidae) in the influence areas of Santo Antônio Hydroelectric Power-Plant in Rondônia, Brazil		en	Instituto Nacional de Pesquisas da Amazônia (INPA)	INPA		Instituto Nacional de Pesquisas da Amazônia - INPA / Invertebrate Collection		BR:INPA:HYM:000424	Fernandes, I.O. | Souza, J.L.P.		female	adult	non-reprodutcive	alcohol	in collection / wet vial	Animalia	Arthropoda	Insecta	Hymenoptera	Formicidae	Pheidole		Pheidole Westwood, 1839	Westwood, 1839	Genus	Ant	Fernandes, I.O. | Souza, J.L.P.	1	Individual
PreservedSpecimen	IlhaBúfalos:km2:2011:1	2017-09-13	Invertebrate Collection of INPA / Environmental monitoring of ants (Hymenoptera: Formicidae) in the influence areas of Santo Antônio Hydroelectric Power-Plant in Rondônia, Brazil		en	Instituto Nacional de Pesquisas da Amazônia (INPA)	INPA		Instituto Nacional de Pesquisas da Amazônia - INPA / Invertebrate Collection		BR:INPA:HYM:000425	Fernandes, I.O. | Souza, J.L.P.		female	adult	non-reprodutcive	alcohol	in collection / wet vial	Animalia	Arthropoda	Insecta	Hymenoptera	Formicidae	Pheidole		Pheidole Westwood, 1839	Westwood, 1839	Genus	Ant	Fernandes, I.O. | Souza, J.L.P.	1	Individual
PreservedSpecimen	Jaci-ParanáMD:Km2:2011:1	2017-09-13	Invertebrate Collection of INPA / Environmental monitoring of ants (Hymenoptera: Formicidae) in the influence areas of Santo Antônio Hydroelectric Power-Plant in Rondônia, Brazil		en	Instituto Nacional de Pesquisas da Amazônia (INPA)	INPA		Instituto Nacional de Pesquisas da Amazônia - INPA / Invertebrate Collection		BR:INPA:HYM:000426	Fernandes, I.O. | Souza, J.L.P.		female	adult	non-reprodutcive	alcohol	in collection / wet vial	Animalia	Arthropoda	Insecta	Hymenoptera	Formicidae	Pheidole		Pheidole Westwood, 1839	Westwood, 1839	Genus	Ant	Fernandes, I.O. | Souza, J.L.P.	1	Individual
PreservedSpecimen	Morrinhos:Km2:2011:1	2017-09-13	Invertebrate Collection of INPA / Environmental monitoring of ants (Hymenoptera: Formicidae) in the influence areas of Santo Antônio Hydroelectric Power-Plant in Rondônia, Brazil		en	Instituto Nacional de Pesquisas da Amazônia (INPA)	INPA		Instituto Nacional de Pesquisas da Amazônia - INPA / Invertebrate Collection		BR:INPA:HYM:000427	Fernandes, I.O. | Souza, J.L.P.		female	adult	non-reprodutcive	alcohol	in collection / wet vial	Animalia	Arthropoda	Insecta	Hymenoptera	Formicidae	Pheidole		Pheidole Westwood, 1839	Westwood, 1839	Genus	Ant	Fernandes, I.O. | Souza, J.L.P.	1	Individual
PreservedSpecimen	Jaci-ParanáMD:Km3:2011:1	2017-09-13	Invertebrate Collection of INPA / Environmental monitoring of ants (Hymenoptera: Formicidae) in the influence areas of Santo Antônio Hydroelectric Power-Plant in Rondônia, Brazil		en	Instituto Nacional de Pesquisas da Amazônia (INPA)	INPA		Instituto Nacional de Pesquisas da Amazônia - INPA / Invertebrate Collection		BR:INPA:HYM:000428	Fernandes, I.O. | Souza, J.L.P.		female	adult	non-reprodutcive	alcohol	in collection / wet vial	Animalia	Arthropoda	Insecta	Hymenoptera	Formicidae	Pheidole		Pheidole Westwood, 1839	Westwood, 1839	Genus	Ant	Fernandes, I.O. | Souza, J.L.P.	1	Individual
PreservedSpecimen	Morrinhos:Km3:2011:1	2017-09-13	Invertebrate Collection of INPA / Environmental monitoring of ants (Hymenoptera: Formicidae) in the influence areas of Santo Antônio Hydroelectric Power-Plant in Rondônia, Brazil		en	Instituto Nacional de Pesquisas da Amazônia (INPA)	INPA		Instituto Nacional de Pesquisas da Amazônia - INPA / Invertebrate Collection		BR:INPA:HYM:000429	Fernandes, I.O. | Souza, J.L.P.		female	adult	non-reprodutcive	alcohol	in collection / wet vial	Animalia	Arthropoda	Insecta	Hymenoptera	Formicidae	Pheidole		Pheidole Westwood, 1839	Westwood, 1839	Genus	Ant	Fernandes, I.O. | Souza, J.L.P.	1	Individual
PreservedSpecimen	IlhaBúfalos:km4:2011:1	2017-09-13	Invertebrate Collection of INPA / Environmental monitoring of ants (Hymenoptera: Formicidae) in the influence areas of Santo Antônio Hydroelectric Power-Plant in Rondônia, Brazil		en	Instituto Nacional de Pesquisas da Amazônia (INPA)	INPA		Instituto Nacional de Pesquisas da Amazônia - INPA / Invertebrate Collection		BR:INPA:HYM:000430	Fernandes, I.O. | Souza, J.L.P.		female	adult	non-reprodutcive	alcohol	in collection / wet vial	Animalia	Arthropoda	Insecta	Hymenoptera	Formicidae	Pheidole		Pheidole Westwood, 1839	Westwood, 1839	Genus	Ant	Fernandes, I.O. | Souza, J.L.P.	1	Individual
PreservedSpecimen	Jaci-ParanáMD:Km4:2011:1	2017-09-13	Invertebrate Collection of INPA / Environmental monitoring of ants (Hymenoptera: Formicidae) in the influence areas of Santo Antônio Hydroelectric Power-Plant in Rondônia, Brazil		en	Instituto Nacional de Pesquisas da Amazônia (INPA)	INPA		Instituto Nacional de Pesquisas da Amazônia - INPA / Invertebrate Collection		BR:INPA:HYM:000431	Fernandes, I.O. | Souza, J.L.P.		female	adult	non-reprodutcive	alcohol	in collection / wet vial	Animalia	Arthropoda	Insecta	Hymenoptera	Formicidae	Pheidole		Pheidole Westwood, 1839	Westwood, 1839	Genus	Ant	Fernandes, I.O. | Souza, J.L.P.	1	Individual
PreservedSpecimen	Morrinhos:Km4:2011:1	2017-09-13	Invertebrate Collection of INPA / Environmental monitoring of ants (Hymenoptera: Formicidae) in the influence areas of Santo Antônio Hydroelectric Power-Plant in Rondônia, Brazil		en	Instituto Nacional de Pesquisas da Amazônia (INPA)	INPA		Instituto Nacional de Pesquisas da Amazônia - INPA / Invertebrate Collection		BR:INPA:HYM:000432	Fernandes, I.O. | Souza, J.L.P.		female	adult	non-reprodutcive	alcohol	in collection / wet vial	Animalia	Arthropoda	Insecta	Hymenoptera	Formicidae	Pheidole		Pheidole Westwood, 1839	Westwood, 1839	Genus	Ant	Fernandes, I.O. | Souza, J.L.P.	1	Individual
PreservedSpecimen	IlhaBúfalos:km0.5:2011:1	2017-09-13	Invertebrate Collection of INPA / Environmental monitoring of ants (Hymenoptera: Formicidae) in the influence areas of Santo Antônio Hydroelectric Power-Plant in Rondônia, Brazil		en	Instituto Nacional de Pesquisas da Amazônia (INPA)	INPA		Instituto Nacional de Pesquisas da Amazônia - INPA / Invertebrate Collection		BR:INPA:HYM:000433	Fernandes, I.O. | Souza, J.L.P.		female	adult	non-reprodutcive	alcohol	in collection / wet vial	Animalia	Arthropoda	Insecta	Hymenoptera	Formicidae	Pheidole		Pheidole Westwood, 1839	Westwood, 1839	Genus	Ant	Fernandes, I.O. | Souza, J.L.P.	1	Individual
PreservedSpecimen	IlhaPedras:km0.5:2011:1	2017-09-13	Invertebrate Collection of INPA / Environmental monitoring of ants (Hymenoptera: Formicidae) in the influence areas of Santo Antônio Hydroelectric Power-Plant in Rondônia, Brazil		en	Instituto Nacional de Pesquisas da Amazônia (INPA)	INPA		Instituto Nacional de Pesquisas da Amazônia - INPA / Invertebrate Collection		BR:INPA:HYM:000434	Fernandes, I.O. | Souza, J.L.P.		female	adult	non-reprodutcive	alcohol	in collection / wet vial	Animalia	Arthropoda	Insecta	Hymenoptera	Formicidae	Pheidole		Pheidole Westwood, 1839	Westwood, 1839	Genus	Ant	Fernandes, I.O. | Souza, J.L.P.	1	Individual
PreservedSpecimen	Morrinhos:Km0.5:2011:1	2017-09-13	Invertebrate Collection of INPA / Environmental monitoring of ants (Hymenoptera: Formicidae) in the influence areas of Santo Antônio Hydroelectric Power-Plant in Rondônia, Brazil		en	Instituto Nacional de Pesquisas da Amazônia (INPA)	INPA		Instituto Nacional de Pesquisas da Amazônia - INPA / Invertebrate Collection		BR:INPA:HYM:000435	Fernandes, I.O. | Souza, J.L.P.		female	adult	non-reprodutcive	alcohol	in collection / wet vial	Animalia	Arthropoda	Insecta	Hymenoptera	Formicidae	Pheidole		Pheidole Westwood, 1839	Westwood, 1839	Genus	Ant	Fernandes, I.O. | Souza, J.L.P.	1	Individual
PreservedSpecimen	IlhaBúfalos:km1:2011:1	2017-09-13	Invertebrate Collection of INPA / Environmental monitoring of ants (Hymenoptera: Formicidae) in the influence areas of Santo Antônio Hydroelectric Power-Plant in Rondônia, Brazil		en	Instituto Nacional de Pesquisas da Amazônia (INPA)	INPA		Instituto Nacional de Pesquisas da Amazônia - INPA / Invertebrate Collection		BR:INPA:HYM:000436	Fernandes, I.O. | Souza, J.L.P.		female	adult	non-reprodutcive	alcohol	in collection / wet vial	Animalia	Arthropoda	Insecta	Hymenoptera	Formicidae	Pheidole		Pheidole Westwood, 1839	Westwood, 1839	Genus	Ant	Fernandes, I.O. | Souza, J.L.P.	1	Individual
PreservedSpecimen	Morrinhos:Km2:2011:1	2017-09-13	Invertebrate Collection of INPA / Environmental monitoring of ants (Hymenoptera: Formicidae) in the influence areas of Santo Antônio Hydroelectric Power-Plant in Rondônia, Brazil		en	Instituto Nacional de Pesquisas da Amazônia (INPA)	INPA		Instituto Nacional de Pesquisas da Amazônia - INPA / Invertebrate Collection		BR:INPA:HYM:000437	Fernandes, I.O. | Souza, J.L.P.		female	adult	non-reprodutcive	alcohol	in collection / wet vial	Animalia	Arthropoda	Insecta	Hymenoptera	Formicidae	Pheidole		Pheidole Westwood, 1839	Westwood, 1839	Genus	Ant	Fernandes, I.O. | Souza, J.L.P.	1	Individual
PreservedSpecimen	IlhaPedras:km2:2011:1	2017-09-13	Invertebrate Collection of INPA / Environmental monitoring of ants (Hymenoptera: Formicidae) in the influence areas of Santo Antônio Hydroelectric Power-Plant in Rondônia, Brazil		en	Instituto Nacional de Pesquisas da Amazônia (INPA)	INPA		Instituto Nacional de Pesquisas da Amazônia - INPA / Invertebrate Collection		BR:INPA:HYM:000438	Fernandes, I.O. | Souza, J.L.P.		female	adult	non-reprodutcive	alcohol	in collection / wet vial	Animalia	Arthropoda	Insecta	Hymenoptera	Formicidae	Pheidole		Pheidole Westwood, 1839	Westwood, 1839	Genus	Ant	Fernandes, I.O. | Souza, J.L.P.	1	Individual
PreservedSpecimen	IlhaPedras:km2:2011:1	2017-09-13	Invertebrate Collection of INPA / Environmental monitoring of ants (Hymenoptera: Formicidae) in the influence areas of Santo Antônio Hydroelectric Power-Plant in Rondônia, Brazil		en	Instituto Nacional de Pesquisas da Amazônia (INPA)	INPA		Instituto Nacional de Pesquisas da Amazônia - INPA / Invertebrate Collection		BR:INPA:HYM:000439	Fernandes, I.O. | Souza, J.L.P.		female	adult	non-reprodutcive	alcohol	in collection / wet vial	Animalia	Arthropoda	Insecta	Hymenoptera	Formicidae	Pheidole		Pheidole Westwood, 1839	Westwood, 1839	Genus	Ant	Fernandes, I.O. | Souza, J.L.P.	1	Individual
PreservedSpecimen	IlhaPedras:km2:2011:1	2017-09-13	Invertebrate Collection of INPA / Environmental monitoring of ants (Hymenoptera: Formicidae) in the influence areas of Santo Antônio Hydroelectric Power-Plant in Rondônia, Brazil		en	Instituto Nacional de Pesquisas da Amazônia (INPA)	INPA		Instituto Nacional de Pesquisas da Amazônia - INPA / Invertebrate Collection		BR:INPA:HYM:000440	Fernandes, I.O. | Souza, J.L.P.		female	adult	non-reprodutcive	alcohol	in collection / wet vial	Animalia	Arthropoda	Insecta	Hymenoptera	Formicidae	Pheidole		Pheidole Westwood, 1839	Westwood, 1839	Genus	Ant	Fernandes, I.O. | Souza, J.L.P.	1	Individual
PreservedSpecimen	IlhaBúfalos:km1:2011:1	2017-09-13	Invertebrate Collection of INPA / Environmental monitoring of ants (Hymenoptera: Formicidae) in the influence areas of Santo Antônio Hydroelectric Power-Plant in Rondônia, Brazil		en	Instituto Nacional de Pesquisas da Amazônia (INPA)	INPA		Instituto Nacional de Pesquisas da Amazônia - INPA / Invertebrate Collection		BR:INPA:HYM:000441	Fernandes, I.O. | Souza, J.L.P.		female	adult	non-reprodutcive	alcohol	in collection / wet vial	Animalia	Arthropoda	Insecta	Hymenoptera	Formicidae	Pheidole		Pheidole Westwood, 1839	Westwood, 1839	Genus	Ant	Fernandes, I.O. | Souza, J.L.P.	1	Individual
PreservedSpecimen	IlhaPedras:km2:2011:1	2017-09-13	Invertebrate Collection of INPA / Environmental monitoring of ants (Hymenoptera: Formicidae) in the influence areas of Santo Antônio Hydroelectric Power-Plant in Rondônia, Brazil		en	Instituto Nacional de Pesquisas da Amazônia (INPA)	INPA		Instituto Nacional de Pesquisas da Amazônia - INPA / Invertebrate Collection		BR:INPA:HYM:000442	Fernandes, I.O. | Souza, J.L.P.		female	adult	non-reprodutcive	alcohol	in collection / wet vial	Animalia	Arthropoda	Insecta	Hymenoptera	Formicidae	Pheidole		Pheidole Westwood, 1839	Westwood, 1839	Genus	Ant	Fernandes, I.O. | Souza, J.L.P.	1	Individual
PreservedSpecimen	IlhaBúfalos:km3:2011:1	2017-09-13	Invertebrate Collection of INPA / Environmental monitoring of ants (Hymenoptera: Formicidae) in the influence areas of Santo Antônio Hydroelectric Power-Plant in Rondônia, Brazil		en	Instituto Nacional de Pesquisas da Amazônia (INPA)	INPA		Instituto Nacional de Pesquisas da Amazônia - INPA / Invertebrate Collection		BR:INPA:HYM:000443	Fernandes, I.O. | Souza, J.L.P.		female	adult	non-reprodutcive	alcohol	in collection / wet vial	Animalia	Arthropoda	Insecta	Hymenoptera	Formicidae	Pheidole		Pheidole Westwood, 1839	Westwood, 1839	Genus	Ant	Fernandes, I.O. | Souza, J.L.P.	1	Individual
PreservedSpecimen	Morrinhos:Km4:2011:1	2017-09-13	Invertebrate Collection of INPA / Environmental monitoring of ants (Hymenoptera: Formicidae) in the influence areas of Santo Antônio Hydroelectric Power-Plant in Rondônia, Brazil		en	Instituto Nacional de Pesquisas da Amazônia (INPA)	INPA		Instituto Nacional de Pesquisas da Amazônia - INPA / Invertebrate Collection		BR:INPA:HYM:000444	Fernandes, I.O. | Souza, J.L.P.		female	adult	non-reprodutcive	alcohol	in collection / wet vial	Animalia	Arthropoda	Insecta	Hymenoptera	Formicidae	Pheidole		Pheidole Westwood, 1839	Westwood, 1839	Genus	Ant	Fernandes, I.O. | Souza, J.L.P.	1	Individual
PreservedSpecimen	Morrinhos:Km0:2011:1	2017-09-13	Invertebrate Collection of INPA / Environmental monitoring of ants (Hymenoptera: Formicidae) in the influence areas of Santo Antônio Hydroelectric Power-Plant in Rondônia, Brazil		en	Instituto Nacional de Pesquisas da Amazônia (INPA)	INPA		Instituto Nacional de Pesquisas da Amazônia - INPA / Invertebrate Collection		BR:INPA:HYM:000445	Fernandes, I.O. | Souza, J.L.P.		female	adult	non-reprodutcive	alcohol	in collection / wet vial	Animalia	Arthropoda	Insecta	Hymenoptera	Formicidae	Pheidole		Pheidole Westwood, 1839	Westwood, 1839	Genus	Ant	Fernandes, I.O. | Souza, J.L.P.	1	Individual
PreservedSpecimen	IlhaPedras:km0.5:2011:1	2017-09-13	Invertebrate Collection of INPA / Environmental monitoring of ants (Hymenoptera: Formicidae) in the influence areas of Santo Antônio Hydroelectric Power-Plant in Rondônia, Brazil		en	Instituto Nacional de Pesquisas da Amazônia (INPA)	INPA		Instituto Nacional de Pesquisas da Amazônia - INPA / Invertebrate Collection		BR:INPA:HYM:000446	Fernandes, I.O. | Souza, J.L.P.		female	adult	non-reprodutcive	alcohol	in collection / wet vial	Animalia	Arthropoda	Insecta	Hymenoptera	Formicidae	Pheidole		Pheidole Westwood, 1839	Westwood, 1839	Genus	Ant	Fernandes, I.O. | Souza, J.L.P.	1	Individual
PreservedSpecimen	Morrinhos:Km4:2011:1	2017-09-13	Invertebrate Collection of INPA / Environmental monitoring of ants (Hymenoptera: Formicidae) in the influence areas of Santo Antônio Hydroelectric Power-Plant in Rondônia, Brazil		en	Instituto Nacional de Pesquisas da Amazônia (INPA)	INPA		Instituto Nacional de Pesquisas da Amazônia - INPA / Invertebrate Collection		BR:INPA:HYM:000447	Fernandes, I.O. | Souza, J.L.P.		female	adult	non-reprodutcive	alcohol	in collection / wet vial	Animalia	Arthropoda	Insecta	Hymenoptera	Formicidae	Pheidole		Pheidole Westwood, 1839	Westwood, 1839	Genus	Ant	Fernandes, I.O. | Souza, J.L.P.	1	Individual
PreservedSpecimen	IlhaBúfalos:km0.5:2011:1	2017-09-13	Invertebrate Collection of INPA / Environmental monitoring of ants (Hymenoptera: Formicidae) in the influence areas of Santo Antônio Hydroelectric Power-Plant in Rondônia, Brazil		en	Instituto Nacional de Pesquisas da Amazônia (INPA)	INPA		Instituto Nacional de Pesquisas da Amazônia - INPA / Invertebrate Collection		BR:INPA:HYM:000448	Fernandes, I.O. | Souza, J.L.P.		female	adult	non-reprodutcive	alcohol	in collection / wet vial	Animalia	Arthropoda	Insecta	Hymenoptera	Formicidae	Pheidole		Pheidole Westwood, 1839	Westwood, 1839	Genus	Ant	Fernandes, I.O. | Souza, J.L.P.	1	Individual
PreservedSpecimen	IlhaPedras:km0.5:2011:1	2017-09-13	Invertebrate Collection of INPA / Environmental monitoring of ants (Hymenoptera: Formicidae) in the influence areas of Santo Antônio Hydroelectric Power-Plant in Rondônia, Brazil		en	Instituto Nacional de Pesquisas da Amazônia (INPA)	INPA		Instituto Nacional de Pesquisas da Amazônia - INPA / Invertebrate Collection		BR:INPA:HYM:000449	Fernandes, I.O. | Souza, J.L.P.		female	adult	non-reprodutcive	alcohol	in collection / wet vial	Animalia	Arthropoda	Insecta	Hymenoptera	Formicidae	Pheidole		Pheidole Westwood, 1839	Westwood, 1839	Genus	Ant	Fernandes, I.O. | Souza, J.L.P.	1	Individual
PreservedSpecimen	IlhaBúfalos:km2:2011:1	2017-09-13	Invertebrate Collection of INPA / Environmental monitoring of ants (Hymenoptera: Formicidae) in the influence areas of Santo Antônio Hydroelectric Power-Plant in Rondônia, Brazil		en	Instituto Nacional de Pesquisas da Amazônia (INPA)	INPA		Instituto Nacional de Pesquisas da Amazônia - INPA / Invertebrate Collection		BR:INPA:HYM:000450	Fernandes, I.O. | Souza, J.L.P.		female	adult	non-reprodutcive	alcohol	in collection / wet vial	Animalia	Arthropoda	Insecta	Hymenoptera	Formicidae	Pheidole		Pheidole Westwood, 1839	Westwood, 1839	Genus	Ant	Fernandes, I.O. | Souza, J.L.P.	1	Individual
PreservedSpecimen	IlhaBúfalos:km0.5:2011:1	2017-09-13	Invertebrate Collection of INPA / Environmental monitoring of ants (Hymenoptera: Formicidae) in the influence areas of Santo Antônio Hydroelectric Power-Plant in Rondônia, Brazil		en	Instituto Nacional de Pesquisas da Amazônia (INPA)	INPA		Instituto Nacional de Pesquisas da Amazônia - INPA / Invertebrate Collection		BR:INPA:HYM:000451	Fernandes, I.O. | Souza, J.L.P.		female	adult	non-reprodutcive	alcohol	in collection / wet vial	Animalia	Arthropoda	Insecta	Hymenoptera	Formicidae	Pheidole		Pheidole Westwood, 1839	Westwood, 1839	Genus	Ant	Fernandes, I.O. | Souza, J.L.P.	1	Individual
PreservedSpecimen	Jaci-ParanáMD:Km4:2011:1	2017-09-13	Invertebrate Collection of INPA / Environmental monitoring of ants (Hymenoptera: Formicidae) in the influence areas of Santo Antônio Hydroelectric Power-Plant in Rondônia, Brazil		en	Instituto Nacional de Pesquisas da Amazônia (INPA)	INPA		Instituto Nacional de Pesquisas da Amazônia - INPA / Invertebrate Collection		BR:INPA:HYM:000452	Fernandes, I.O. | Souza, J.L.P.		female	adult	non-reprodutcive	alcohol	in collection / wet vial	Animalia	Arthropoda	Insecta	Hymenoptera	Formicidae	Pheidole		Pheidole Westwood, 1839	Westwood, 1839	Genus	Ant	Fernandes, I.O. | Souza, J.L.P.	1	Individual
PreservedSpecimen	IlhaPedras:km4:2011:1	2017-09-13	Invertebrate Collection of INPA / Environmental monitoring of ants (Hymenoptera: Formicidae) in the influence areas of Santo Antônio Hydroelectric Power-Plant in Rondônia, Brazil		en	Instituto Nacional de Pesquisas da Amazônia (INPA)	INPA		Instituto Nacional de Pesquisas da Amazônia - INPA / Invertebrate Collection		BR:INPA:HYM:000453	Fernandes, I.O. | Souza, J.L.P.		female	adult	non-reprodutcive	alcohol	in collection / wet vial	Animalia	Arthropoda	Insecta	Hymenoptera	Formicidae	Pheidole	biconstricta	Pheidole biconstricta Mayr, 1870	Mayr, 1870	Species	Ant	Fernandes, I.O. | Souza, J.L.P.	1	Individual
PreservedSpecimen	Jaci-ParanáMD:Km1:2011:1	2017-09-13	Invertebrate Collection of INPA / Environmental monitoring of ants (Hymenoptera: Formicidae) in the influence areas of Santo Antônio Hydroelectric Power-Plant in Rondônia, Brazil		en	Instituto Nacional de Pesquisas da Amazônia (INPA)	INPA		Instituto Nacional de Pesquisas da Amazônia - INPA / Invertebrate Collection		BR:INPA:HYM:000454	Fernandes, I.O. | Souza, J.L.P.		female	adult	non-reprodutcive	alcohol	in collection / wet vial	Animalia	Arthropoda	Insecta	Hymenoptera	Formicidae	Pheidole	biconstricta	Pheidole biconstricta Mayr, 1870	Mayr, 1870	Species	Ant	Fernandes, I.O. | Souza, J.L.P.	1	Individual
PreservedSpecimen	IlhaPedras:km3:2011:1	2017-09-13	Invertebrate Collection of INPA / Environmental monitoring of ants (Hymenoptera: Formicidae) in the influence areas of Santo Antônio Hydroelectric Power-Plant in Rondônia, Brazil		en	Instituto Nacional de Pesquisas da Amazônia (INPA)	INPA		Instituto Nacional de Pesquisas da Amazônia - INPA / Invertebrate Collection		BR:INPA:HYM:000455	Fernandes, I.O. | Souza, J.L.P.		female	adult	non-reprodutcive	alcohol	in collection / wet vial	Animalia	Arthropoda	Insecta	Hymenoptera	Formicidae	Pheidole	biconstricta	Pheidole biconstricta Mayr, 1870	Mayr, 1870	Species	Ant	Fernandes, I.O. | Souza, J.L.P.	1	Individual
PreservedSpecimen	IlhaPedras:km4:2011:1	2017-09-13	Invertebrate Collection of INPA / Environmental monitoring of ants (Hymenoptera: Formicidae) in the influence areas of Santo Antônio Hydroelectric Power-Plant in Rondônia, Brazil		en	Instituto Nacional de Pesquisas da Amazônia (INPA)	INPA		Instituto Nacional de Pesquisas da Amazônia - INPA / Invertebrate Collection		BR:INPA:HYM:000456	Fernandes, I.O. | Souza, J.L.P.		female	adult	non-reprodutcive	alcohol	in collection / wet vial	Animalia	Arthropoda	Insecta	Hymenoptera	Formicidae	Pheidole	biconstricta	Pheidole biconstricta Mayr, 1870	Mayr, 1870	Species	Ant	Fernandes, I.O. | Souza, J.L.P.	1	Individual
PreservedSpecimen	IlhaPedras:km0.5:2011:1	2017-09-13	Invertebrate Collection of INPA / Environmental monitoring of ants (Hymenoptera: Formicidae) in the influence areas of Santo Antônio Hydroelectric Power-Plant in Rondônia, Brazil		en	Instituto Nacional de Pesquisas da Amazônia (INPA)	INPA		Instituto Nacional de Pesquisas da Amazônia - INPA / Invertebrate Collection		BR:INPA:HYM:000457	Fernandes, I.O. | Souza, J.L.P.		female	adult	non-reprodutcive	alcohol	in collection / wet vial	Animalia	Arthropoda	Insecta	Hymenoptera	Formicidae	Pheidole	biconstricta	Pheidole biconstricta Mayr, 1870	Mayr, 1870	Species	Ant	Fernandes, I.O. | Souza, J.L.P.	1	Individual
PreservedSpecimen	Jaci-ParanáMD:Km0.5:2011:1	2017-09-13	Invertebrate Collection of INPA / Environmental monitoring of ants (Hymenoptera: Formicidae) in the influence areas of Santo Antônio Hydroelectric Power-Plant in Rondônia, Brazil		en	Instituto Nacional de Pesquisas da Amazônia (INPA)	INPA		Instituto Nacional de Pesquisas da Amazônia - INPA / Invertebrate Collection		BR:INPA:HYM:000458	Fernandes, I.O. | Souza, J.L.P.		female	adult	non-reprodutcive	alcohol	in collection / wet vial	Animalia	Arthropoda	Insecta	Hymenoptera	Formicidae	Pheidole	biconstricta	Pheidole biconstricta Mayr, 1870	Mayr, 1870	Species	Ant	Fernandes, I.O. | Souza, J.L.P.	1	Individual
PreservedSpecimen	IlhaBúfalos:km1:2011:1	2017-09-13	Invertebrate Collection of INPA / Environmental monitoring of ants (Hymenoptera: Formicidae) in the influence areas of Santo Antônio Hydroelectric Power-Plant in Rondônia, Brazil		en	Instituto Nacional de Pesquisas da Amazônia (INPA)	INPA		Instituto Nacional de Pesquisas da Amazônia - INPA / Invertebrate Collection		BR:INPA:HYM:000459	Fernandes, I.O. | Souza, J.L.P.		female	adult	non-reprodutcive	alcohol	in collection / wet vial	Animalia	Arthropoda	Insecta	Hymenoptera	Formicidae	Pheidole	biconstricta	Pheidole biconstricta Mayr, 1870	Mayr, 1870	Species	Ant	Fernandes, I.O. | Souza, J.L.P.	1	Individual
PreservedSpecimen	Morrinhos:Km3:2011:1	2017-09-13	Invertebrate Collection of INPA / Environmental monitoring of ants (Hymenoptera: Formicidae) in the influence areas of Santo Antônio Hydroelectric Power-Plant in Rondônia, Brazil		en	Instituto Nacional de Pesquisas da Amazônia (INPA)	INPA		Instituto Nacional de Pesquisas da Amazônia - INPA / Invertebrate Collection		BR:INPA:HYM:000460	Fernandes, I.O. | Souza, J.L.P.		female	adult	non-reprodutcive	alcohol	in collection / wet vial	Animalia	Arthropoda	Insecta	Hymenoptera	Formicidae	Pheidole		Pheidole Westwood, 1839	Westwood, 1839	Genus	Ant	Fernandes, I.O. | Souza, J.L.P.	1	Individual
PreservedSpecimen	Morrinhos:Km1:2011:1	2017-09-13	Invertebrate Collection of INPA / Environmental monitoring of ants (Hymenoptera: Formicidae) in the influence areas of Santo Antônio Hydroelectric Power-Plant in Rondônia, Brazil		en	Instituto Nacional de Pesquisas da Amazônia (INPA)	INPA		Instituto Nacional de Pesquisas da Amazônia - INPA / Invertebrate Collection		BR:INPA:HYM:000461	Fernandes, I.O. | Souza, J.L.P.		female	adult	non-reprodutcive	alcohol	in collection / wet vial	Animalia	Arthropoda	Insecta	Hymenoptera	Formicidae	Pheidole		Pheidole Westwood, 1839	Westwood, 1839	Genus	Ant	Fernandes, I.O. | Souza, J.L.P.	1	Individual
PreservedSpecimen	IlhaBúfalos:km0.5:2011:1	2017-09-13	Invertebrate Collection of INPA / Environmental monitoring of ants (Hymenoptera: Formicidae) in the influence areas of Santo Antônio Hydroelectric Power-Plant in Rondônia, Brazil		en	Instituto Nacional de Pesquisas da Amazônia (INPA)	INPA		Instituto Nacional de Pesquisas da Amazônia - INPA / Invertebrate Collection		BR:INPA:HYM:000462	Fernandes, I.O. | Souza, J.L.P.		female	adult	non-reprodutcive	alcohol	in collection / wet vial	Animalia	Arthropoda	Insecta	Hymenoptera	Formicidae	Pheidole	flavens	Pheidole flavens Roger, 1863	Roger, 1863	Species	Ant	Fernandes, I.O. | Souza, J.L.P.	1	Individual
PreservedSpecimen	IlhaBúfalos:km1:2011:1	2017-09-13	Invertebrate Collection of INPA / Environmental monitoring of ants (Hymenoptera: Formicidae) in the influence areas of Santo Antônio Hydroelectric Power-Plant in Rondônia, Brazil		en	Instituto Nacional de Pesquisas da Amazônia (INPA)	INPA		Instituto Nacional de Pesquisas da Amazônia - INPA / Invertebrate Collection		BR:INPA:HYM:000463	Fernandes, I.O. | Souza, J.L.P.		female	adult	non-reprodutcive	alcohol	in collection / wet vial	Animalia	Arthropoda	Insecta	Hymenoptera	Formicidae	Pheidole	flavens	Pheidole flavens Roger, 1863	Roger, 1863	Species	Ant	Fernandes, I.O. | Souza, J.L.P.	1	Individual
PreservedSpecimen	IlhaBúfalos:km0:2011:1	2017-09-13	Invertebrate Collection of INPA / Environmental monitoring of ants (Hymenoptera: Formicidae) in the influence areas of Santo Antônio Hydroelectric Power-Plant in Rondônia, Brazil		en	Instituto Nacional de Pesquisas da Amazônia (INPA)	INPA		Instituto Nacional de Pesquisas da Amazônia - INPA / Invertebrate Collection		BR:INPA:HYM:000464	Fernandes, I.O. | Souza, J.L.P.		female	adult	non-reprodutcive	alcohol	in collection / wet vial	Animalia	Arthropoda	Insecta	Hymenoptera	Formicidae	Pheidole	flavens	Pheidole flavens Roger, 1863	Roger, 1863	Species	Ant	Fernandes, I.O. | Souza, J.L.P.	1	Individual
PreservedSpecimen	Jaci-ParanáMD:Km3:2011:1	2017-09-13	Invertebrate Collection of INPA / Environmental monitoring of ants (Hymenoptera: Formicidae) in the influence areas of Santo Antônio Hydroelectric Power-Plant in Rondônia, Brazil		en	Instituto Nacional de Pesquisas da Amazônia (INPA)	INPA		Instituto Nacional de Pesquisas da Amazônia - INPA / Invertebrate Collection		BR:INPA:HYM:000465	Fernandes, I.O. | Souza, J.L.P.		female	adult	non-reprodutcive	alcohol	in collection / wet vial	Animalia	Arthropoda	Insecta	Hymenoptera	Formicidae	Pheidole		Pheidole Westwood, 1839	Westwood, 1839	Genus	Ant	Fernandes, I.O. | Souza, J.L.P.	1	Individual
PreservedSpecimen	IlhaBúfalos:km4:2011:1	2017-09-13	Invertebrate Collection of INPA / Environmental monitoring of ants (Hymenoptera: Formicidae) in the influence areas of Santo Antônio Hydroelectric Power-Plant in Rondônia, Brazil		en	Instituto Nacional de Pesquisas da Amazônia (INPA)	INPA		Instituto Nacional de Pesquisas da Amazônia - INPA / Invertebrate Collection		BR:INPA:HYM:000466	Fernandes, I.O. | Souza, J.L.P.		female	adult	non-reprodutcive	alcohol	in collection / wet vial	Animalia	Arthropoda	Insecta	Hymenoptera	Formicidae	Pheidole		Pheidole Westwood, 1839	Westwood, 1839	Genus	Ant	Fernandes, I.O. | Souza, J.L.P.	1	Individual
PreservedSpecimen	IlhaPedras:km0:2011:1	2017-09-13	Invertebrate Collection of INPA / Environmental monitoring of ants (Hymenoptera: Formicidae) in the influence areas of Santo Antônio Hydroelectric Power-Plant in Rondônia, Brazil		en	Instituto Nacional de Pesquisas da Amazônia (INPA)	INPA		Instituto Nacional de Pesquisas da Amazônia - INPA / Invertebrate Collection		BR:INPA:HYM:000467	Fernandes, I.O. | Souza, J.L.P.		female	adult	non-reprodutcive	alcohol	in collection / wet vial	Animalia	Arthropoda	Insecta	Hymenoptera	Formicidae	Pheidole		Pheidole Westwood, 1839	Westwood, 1839	Genus	Ant	Fernandes, I.O. | Souza, J.L.P.	1	Individual
PreservedSpecimen	IlhaPedras:km0:2011:1	2017-09-13	Invertebrate Collection of INPA / Environmental monitoring of ants (Hymenoptera: Formicidae) in the influence areas of Santo Antônio Hydroelectric Power-Plant in Rondônia, Brazil		en	Instituto Nacional de Pesquisas da Amazônia (INPA)	INPA		Instituto Nacional de Pesquisas da Amazônia - INPA / Invertebrate Collection		BR:INPA:HYM:000468	Fernandes, I.O. | Souza, J.L.P.		female	adult	non-reprodutcive	alcohol	in collection / wet vial	Animalia	Arthropoda	Insecta	Hymenoptera	Formicidae	Pheidole		Pheidole Westwood, 1839	Westwood, 1839	Genus	Ant	Fernandes, I.O. | Souza, J.L.P.	1	Individual
PreservedSpecimen	IlhaPedras:km2:2011:1	2017-09-13	Invertebrate Collection of INPA / Environmental monitoring of ants (Hymenoptera: Formicidae) in the influence areas of Santo Antônio Hydroelectric Power-Plant in Rondônia, Brazil		en	Instituto Nacional de Pesquisas da Amazônia (INPA)	INPA		Instituto Nacional de Pesquisas da Amazônia - INPA / Invertebrate Collection		BR:INPA:HYM:000469	Fernandes, I.O. | Souza, J.L.P.		female	adult	non-reprodutcive	alcohol	in collection / wet vial	Animalia	Arthropoda	Insecta	Hymenoptera	Formicidae	Pheidole		Pheidole Westwood, 1839	Westwood, 1839	Genus	Ant	Fernandes, I.O. | Souza, J.L.P.	1	Individual
PreservedSpecimen	IlhaPedras:km0:2011:1	2017-09-13	Invertebrate Collection of INPA / Environmental monitoring of ants (Hymenoptera: Formicidae) in the influence areas of Santo Antônio Hydroelectric Power-Plant in Rondônia, Brazil		en	Instituto Nacional de Pesquisas da Amazônia (INPA)	INPA		Instituto Nacional de Pesquisas da Amazônia - INPA / Invertebrate Collection		BR:INPA:HYM:000470	Fernandes, I.O. | Souza, J.L.P.		female	adult	non-reprodutcive	alcohol	in collection / wet vial	Animalia	Arthropoda	Insecta	Hymenoptera	Formicidae	Pseudomyrmex	tenuis	Pseudomyrmex tenuis (Fabricius, 1804)	(Fabricius, 1804)	Species	Ant	Fernandes, I.O. | Souza, J.L.P.	1	Individual
PreservedSpecimen	IlhaPedras:km3:2011:1	2017-09-13	Invertebrate Collection of INPA / Environmental monitoring of ants (Hymenoptera: Formicidae) in the influence areas of Santo Antônio Hydroelectric Power-Plant in Rondônia, Brazil		en	Instituto Nacional de Pesquisas da Amazônia (INPA)	INPA		Instituto Nacional de Pesquisas da Amazônia - INPA / Invertebrate Collection		BR:INPA:HYM:000471	Fernandes, I.O. | Souza, J.L.P.		female	adult	non-reprodutcive	alcohol	in collection / wet vial	Animalia	Arthropoda	Insecta	Hymenoptera	Formicidae	Pseudomyrmex	tenuis	Pseudomyrmex tenuis (Fabricius, 1804)	(Fabricius, 1804)	Species	Ant	Fernandes, I.O. | Souza, J.L.P.	1	Individual
PreservedSpecimen	IlhaPedras:km2:2011:1	2017-09-13	Invertebrate Collection of INPA / Environmental monitoring of ants (Hymenoptera: Formicidae) in the influence areas of Santo Antônio Hydroelectric Power-Plant in Rondônia, Brazil		en	Instituto Nacional de Pesquisas da Amazônia (INPA)	INPA		Instituto Nacional de Pesquisas da Amazônia - INPA / Invertebrate Collection		BR:INPA:HYM:000472	Fernandes, I.O. | Souza, J.L.P.		female	adult	non-reprodutcive	alcohol	in collection / wet vial	Animalia	Arthropoda	Insecta	Hymenoptera	Formicidae	Pseudomyrmex	tenuis	Pseudomyrmex tenuis (Fabricius, 1804)	(Fabricius, 1804)	Species	Ant	Fernandes, I.O. | Souza, J.L.P.	1	Individual
PreservedSpecimen	Jaci-ParanáMD:Km2:2011:1	2017-09-13	Invertebrate Collection of INPA / Environmental monitoring of ants (Hymenoptera: Formicidae) in the influence areas of Santo Antônio Hydroelectric Power-Plant in Rondônia, Brazil		en	Instituto Nacional de Pesquisas da Amazônia (INPA)	INPA		Instituto Nacional de Pesquisas da Amazônia - INPA / Invertebrate Collection		BR:INPA:HYM:000473	Fernandes, I.O. | Souza, J.L.P.		female	adult	non-reprodutcive	alcohol	in collection / wet vial	Animalia	Arthropoda	Insecta	Hymenoptera	Formicidae	Pseudomyrmex	tenuis	Pseudomyrmex tenuis (Fabricius, 1804)	(Fabricius, 1804)	Species	Ant	Fernandes, I.O. | Souza, J.L.P.	1	Individual
PreservedSpecimen	IlhaBúfalos:km4:2011:1	2017-09-13	Invertebrate Collection of INPA / Environmental monitoring of ants (Hymenoptera: Formicidae) in the influence areas of Santo Antônio Hydroelectric Power-Plant in Rondônia, Brazil		en	Instituto Nacional de Pesquisas da Amazônia (INPA)	INPA		Instituto Nacional de Pesquisas da Amazônia - INPA / Invertebrate Collection		BR:INPA:HYM:000474	Fernandes, I.O. | Souza, J.L.P.		female	adult	non-reprodutcive	alcohol	in collection / wet vial	Animalia	Arthropoda	Insecta	Hymenoptera	Formicidae	Pseudomyrmex	tenuis	Pseudomyrmex tenuis (Fabricius, 1804)	(Fabricius, 1804)	Species	Ant	Fernandes, I.O. | Souza, J.L.P.	1	Individual
PreservedSpecimen	Jaci-ParanáMD:Km0:2011:1	2017-09-13	Invertebrate Collection of INPA / Environmental monitoring of ants (Hymenoptera: Formicidae) in the influence areas of Santo Antônio Hydroelectric Power-Plant in Rondônia, Brazil		en	Instituto Nacional de Pesquisas da Amazônia (INPA)	INPA		Instituto Nacional de Pesquisas da Amazônia - INPA / Invertebrate Collection		BR:INPA:HYM:000475	Fernandes, I.O. | Souza, J.L.P.		female	adult	non-reprodutcive	alcohol	in collection / wet vial	Animalia	Arthropoda	Insecta	Hymenoptera	Formicidae	Pseudomyrmex		Pseudomyrmex Lund, 1831	Lund, 1831	Genus	Ant	Fernandes, I.O. | Souza, J.L.P.	1	Individual
PreservedSpecimen	Jaci-ParanáMD:Km0:2011:1	2017-09-13	Invertebrate Collection of INPA / Environmental monitoring of ants (Hymenoptera: Formicidae) in the influence areas of Santo Antônio Hydroelectric Power-Plant in Rondônia, Brazil		en	Instituto Nacional de Pesquisas da Amazônia (INPA)	INPA		Instituto Nacional de Pesquisas da Amazônia - INPA / Invertebrate Collection		BR:INPA:HYM:000476	Fernandes, I.O. | Souza, J.L.P.		female	adult	non-reprodutcive	alcohol	in collection / wet vial	Animalia	Arthropoda	Insecta	Hymenoptera	Formicidae	Pseudomyrmex		Pseudomyrmex Lund, 1831	Lund, 1831	Genus	Ant	Fernandes, I.O. | Souza, J.L.P.	1	Individual
PreservedSpecimen	Morrinhos:Km0:2011:1	2017-09-13	Invertebrate Collection of INPA / Environmental monitoring of ants (Hymenoptera: Formicidae) in the influence areas of Santo Antônio Hydroelectric Power-Plant in Rondônia, Brazil		en	Instituto Nacional de Pesquisas da Amazônia (INPA)	INPA		Instituto Nacional de Pesquisas da Amazônia - INPA / Invertebrate Collection		BR:INPA:HYM:000477	Fernandes, I.O. | Souza, J.L.P.		female	adult	non-reprodutcive	alcohol	in collection / wet vial	Animalia	Arthropoda	Insecta	Hymenoptera	Formicidae	Strumigenys	beebei	Strumigenys beebei (Wheeler, 1915)	(Wheeler, 1915)	Species	Ant	Fernandes, I.O. | Souza, J.L.P.	1	Individual
PreservedSpecimen	Jaci-ParanáMD:Km4:2011:1	2017-09-13	Invertebrate Collection of INPA / Environmental monitoring of ants (Hymenoptera: Formicidae) in the influence areas of Santo Antônio Hydroelectric Power-Plant in Rondônia, Brazil		en	Instituto Nacional de Pesquisas da Amazônia (INPA)	INPA		Instituto Nacional de Pesquisas da Amazônia - INPA / Invertebrate Collection		BR:INPA:HYM:000478	Fernandes, I.O. | Souza, J.L.P.		female	adult	non-reprodutcive	alcohol	in collection / wet vial	Animalia	Arthropoda	Insecta	Hymenoptera	Formicidae	Strumigenys	denticulata	Strumigenys denticulata Mayr, 1887	Mayr, 1887	Species	Ant	Fernandes, I.O. | Souza, J.L.P.	1	Individual
PreservedSpecimen	Jaci-ParanáMD:Km4:2011:1	2017-09-13	Invertebrate Collection of INPA / Environmental monitoring of ants (Hymenoptera: Formicidae) in the influence areas of Santo Antônio Hydroelectric Power-Plant in Rondônia, Brazil		en	Instituto Nacional de Pesquisas da Amazônia (INPA)	INPA		Instituto Nacional de Pesquisas da Amazônia - INPA / Invertebrate Collection		BR:INPA:HYM:000479	Fernandes, I.O. | Souza, J.L.P.		female	adult	non-reprodutcive	alcohol	in collection / wet vial	Animalia	Arthropoda	Insecta	Hymenoptera	Formicidae	Strumigenys	denticulata	Strumigenys denticulata Mayr, 1887	Mayr, 1887	Species	Ant	Fernandes, I.O. | Souza, J.L.P.	1	Individual
PreservedSpecimen	Morrinhos:Km2:2011:1	2017-09-13	Invertebrate Collection of INPA / Environmental monitoring of ants (Hymenoptera: Formicidae) in the influence areas of Santo Antônio Hydroelectric Power-Plant in Rondônia, Brazil		en	Instituto Nacional de Pesquisas da Amazônia (INPA)	INPA		Instituto Nacional de Pesquisas da Amazônia - INPA / Invertebrate Collection		BR:INPA:HYM:000480	Fernandes, I.O. | Souza, J.L.P.		female	adult	non-reprodutcive	alcohol	in collection / wet vial	Animalia	Arthropoda	Insecta	Hymenoptera	Formicidae	Strumigenys	denticulata	Strumigenys denticulata Mayr, 1887	Mayr, 1887	Species	Ant	Fernandes, I.O. | Souza, J.L.P.	1	Individual
PreservedSpecimen	Jaci-ParanáMD:Km3:2011:1	2017-09-13	Invertebrate Collection of INPA / Environmental monitoring of ants (Hymenoptera: Formicidae) in the influence areas of Santo Antônio Hydroelectric Power-Plant in Rondônia, Brazil		en	Instituto Nacional de Pesquisas da Amazônia (INPA)	INPA		Instituto Nacional de Pesquisas da Amazônia - INPA / Invertebrate Collection		BR:INPA:HYM:000481	Fernandes, I.O. | Souza, J.L.P.		female	adult	non-reprodutcive	alcohol	in collection / wet vial	Animalia	Arthropoda	Insecta	Hymenoptera	Formicidae	Strumigenys	denticulata	Strumigenys denticulata Mayr, 1887	Mayr, 1887	Species	Ant	Fernandes, I.O. | Souza, J.L.P.	1	Individual
PreservedSpecimen	Jaci-ParanáMD:Km4:2011:1	2017-09-13	Invertebrate Collection of INPA / Environmental monitoring of ants (Hymenoptera: Formicidae) in the influence areas of Santo Antônio Hydroelectric Power-Plant in Rondônia, Brazil		en	Instituto Nacional de Pesquisas da Amazônia (INPA)	INPA		Instituto Nacional de Pesquisas da Amazônia - INPA / Invertebrate Collection		BR:INPA:HYM:000482	Fernandes, I.O. | Souza, J.L.P.		female	adult	non-reprodutcive	alcohol	in collection / wet vial	Animalia	Arthropoda	Insecta	Hymenoptera	Formicidae	Strumigenys	denticulata	Strumigenys denticulata Mayr, 1887	Mayr, 1887	Species	Ant	Fernandes, I.O. | Souza, J.L.P.	1	Individual
PreservedSpecimen	Morrinhos:Km2:2011:1	2017-09-13	Invertebrate Collection of INPA / Environmental monitoring of ants (Hymenoptera: Formicidae) in the influence areas of Santo Antônio Hydroelectric Power-Plant in Rondônia, Brazil		en	Instituto Nacional de Pesquisas da Amazônia (INPA)	INPA		Instituto Nacional de Pesquisas da Amazônia - INPA / Invertebrate Collection		BR:INPA:HYM:000483	Fernandes, I.O. | Souza, J.L.P.		female	adult	non-reprodutcive	alcohol	in collection / wet vial	Animalia	Arthropoda	Insecta	Hymenoptera	Formicidae	Strumigenys	denticulata	Strumigenys denticulata Mayr, 1887	Mayr, 1887	Species	Ant	Fernandes, I.O. | Souza, J.L.P.	1	Individual
PreservedSpecimen	Jaci-ParanáMD:Km3:2011:1	2017-09-13	Invertebrate Collection of INPA / Environmental monitoring of ants (Hymenoptera: Formicidae) in the influence areas of Santo Antônio Hydroelectric Power-Plant in Rondônia, Brazil		en	Instituto Nacional de Pesquisas da Amazônia (INPA)	INPA		Instituto Nacional de Pesquisas da Amazônia - INPA / Invertebrate Collection		BR:INPA:HYM:000484	Fernandes, I.O. | Souza, J.L.P.		female	adult	non-reprodutcive	alcohol	in collection / wet vial	Animalia	Arthropoda	Insecta	Hymenoptera	Formicidae	Strumigenys	denticulata	Strumigenys denticulata Mayr, 1887	Mayr, 1887	Species	Ant	Fernandes, I.O. | Souza, J.L.P.	1	Individual
PreservedSpecimen	Jaci-ParanáMD:Km4:2011:1	2017-09-13	Invertebrate Collection of INPA / Environmental monitoring of ants (Hymenoptera: Formicidae) in the influence areas of Santo Antônio Hydroelectric Power-Plant in Rondônia, Brazil		en	Instituto Nacional de Pesquisas da Amazônia (INPA)	INPA		Instituto Nacional de Pesquisas da Amazônia - INPA / Invertebrate Collection		BR:INPA:HYM:000485	Fernandes, I.O. | Souza, J.L.P.		female	adult	non-reprodutcive	alcohol	in collection / wet vial	Animalia	Arthropoda	Insecta	Hymenoptera	Formicidae	Strumigenys	denticulata	Strumigenys denticulata Mayr, 1887	Mayr, 1887	Species	Ant	Fernandes, I.O. | Souza, J.L.P.	1	Individual
PreservedSpecimen	IlhaPedras:km0:2011:1	2017-09-13	Invertebrate Collection of INPA / Environmental monitoring of ants (Hymenoptera: Formicidae) in the influence areas of Santo Antônio Hydroelectric Power-Plant in Rondônia, Brazil		en	Instituto Nacional de Pesquisas da Amazônia (INPA)	INPA		Instituto Nacional de Pesquisas da Amazônia - INPA / Invertebrate Collection		BR:INPA:HYM:000486	Fernandes, I.O. | Souza, J.L.P.		female	adult	non-reprodutcive	alcohol	in collection / wet vial	Animalia	Arthropoda	Insecta	Hymenoptera	Formicidae	Strumigenys	inusitata	Strumigenys inusitata (Lattke, 1992)	(Lattke, 1992)	Species	Ant	Fernandes, I.O. | Souza, J.L.P.	1	Individual
PreservedSpecimen	IlhaBúfalos:km4:2011:1	2017-09-13	Invertebrate Collection of INPA / Environmental monitoring of ants (Hymenoptera: Formicidae) in the influence areas of Santo Antônio Hydroelectric Power-Plant in Rondônia, Brazil		en	Instituto Nacional de Pesquisas da Amazônia (INPA)	INPA		Instituto Nacional de Pesquisas da Amazônia - INPA / Invertebrate Collection		BR:INPA:HYM:000487	Fernandes, I.O. | Souza, J.L.P.		female	adult	non-reprodutcive	alcohol	in collection / wet vial	Animalia	Arthropoda	Insecta	Hymenoptera	Formicidae	Strumigenys	smithii	Strumigenys smithii Forel, 1886	Forel, 1886	Species	Ant	Fernandes, I.O. | Souza, J.L.P.	1	Individual
PreservedSpecimen	Jaci-ParanáMD:Km3:2011:1	2017-09-13	Invertebrate Collection of INPA / Environmental monitoring of ants (Hymenoptera: Formicidae) in the influence areas of Santo Antônio Hydroelectric Power-Plant in Rondônia, Brazil		en	Instituto Nacional de Pesquisas da Amazônia (INPA)	INPA		Instituto Nacional de Pesquisas da Amazônia - INPA / Invertebrate Collection		BR:INPA:HYM:000488	Fernandes, I.O. | Souza, J.L.P.		female	adult	non-reprodutcive	alcohol	in collection / wet vial	Animalia	Arthropoda	Insecta	Hymenoptera	Formicidae	Strumigenys	smithii	Strumigenys smithii Forel, 1886	Forel, 1886	Species	Ant	Fernandes, I.O. | Souza, J.L.P.	1	Individual
PreservedSpecimen	IlhaBúfalos:km0.5:2011:1	2017-09-13	Invertebrate Collection of INPA / Environmental monitoring of ants (Hymenoptera: Formicidae) in the influence areas of Santo Antônio Hydroelectric Power-Plant in Rondônia, Brazil		en	Instituto Nacional de Pesquisas da Amazônia (INPA)	INPA		Instituto Nacional de Pesquisas da Amazônia - INPA / Invertebrate Collection		BR:INPA:HYM:000489	Fernandes, I.O. | Souza, J.L.P.		female	adult	non-reprodutcive	alcohol	in collection / wet vial	Animalia	Arthropoda	Insecta	Hymenoptera	Formicidae	Strumigenys		Strumigenys Smith, 1860	Smith, 1860	Genus	Ant	Fernandes, I.O. | Souza, J.L.P.	1	Individual
PreservedSpecimen	IlhaBúfalos:km2:2011:1	2017-09-13	Invertebrate Collection of INPA / Environmental monitoring of ants (Hymenoptera: Formicidae) in the influence areas of Santo Antônio Hydroelectric Power-Plant in Rondônia, Brazil		en	Instituto Nacional de Pesquisas da Amazônia (INPA)	INPA		Instituto Nacional de Pesquisas da Amazônia - INPA / Invertebrate Collection		BR:INPA:HYM:000490	Fernandes, I.O. | Souza, J.L.P.		female	adult	non-reprodutcive	alcohol	in collection / wet vial	Animalia	Arthropoda	Insecta	Hymenoptera	Formicidae	Strumigenys		Strumigenys Smith, 1860	Smith, 1860	Genus	Ant	Fernandes, I.O. | Souza, J.L.P.	1	Individual
PreservedSpecimen	Jaci-ParanáMD:Km4:2011:1	2017-09-13	Invertebrate Collection of INPA / Environmental monitoring of ants (Hymenoptera: Formicidae) in the influence areas of Santo Antônio Hydroelectric Power-Plant in Rondônia, Brazil		en	Instituto Nacional de Pesquisas da Amazônia (INPA)	INPA		Instituto Nacional de Pesquisas da Amazônia - INPA / Invertebrate Collection		BR:INPA:HYM:000491	Fernandes, I.O. | Souza, J.L.P.		female	adult	non-reprodutcive	alcohol	in collection / wet vial	Animalia	Arthropoda	Insecta	Hymenoptera	Formicidae	Strumigenys		Strumigenys Smith, 1860	Smith, 1860	Genus	Ant	Fernandes, I.O. | Souza, J.L.P.	1	Individual
PreservedSpecimen	IlhaBúfalos:km1:2011:1	2017-09-13	Invertebrate Collection of INPA / Environmental monitoring of ants (Hymenoptera: Formicidae) in the influence areas of Santo Antônio Hydroelectric Power-Plant in Rondônia, Brazil		en	Instituto Nacional de Pesquisas da Amazônia (INPA)	INPA		Instituto Nacional de Pesquisas da Amazônia - INPA / Invertebrate Collection		BR:INPA:HYM:000492	Fernandes, I.O. | Souza, J.L.P.		female	adult	non-reprodutcive	alcohol	in collection / wet vial	Animalia	Arthropoda	Insecta	Hymenoptera	Formicidae	Strumigenys		Strumigenys Smith, 1860	Smith, 1860	Genus	Ant	Fernandes, I.O. | Souza, J.L.P.	1	Individual
PreservedSpecimen	IlhaBúfalos:km1:2011:1	2017-09-13	Invertebrate Collection of INPA / Environmental monitoring of ants (Hymenoptera: Formicidae) in the influence areas of Santo Antônio Hydroelectric Power-Plant in Rondônia, Brazil		en	Instituto Nacional de Pesquisas da Amazônia (INPA)	INPA		Instituto Nacional de Pesquisas da Amazônia - INPA / Invertebrate Collection		BR:INPA:HYM:000493	Fernandes, I.O. | Souza, J.L.P.		female	adult	non-reprodutcive	alcohol	in collection / wet vial	Animalia	Arthropoda	Insecta	Hymenoptera	Formicidae	Strumigenys		Strumigenys Smith, 1860	Smith, 1860	Genus	Ant	Fernandes, I.O. | Souza, J.L.P.	1	Individual
PreservedSpecimen	Jaci-ParanáMD:Km3:2011:1	2017-09-13	Invertebrate Collection of INPA / Environmental monitoring of ants (Hymenoptera: Formicidae) in the influence areas of Santo Antônio Hydroelectric Power-Plant in Rondônia, Brazil		en	Instituto Nacional de Pesquisas da Amazônia (INPA)	INPA		Instituto Nacional de Pesquisas da Amazônia - INPA / Invertebrate Collection		BR:INPA:HYM:000494	Fernandes, I.O. | Souza, J.L.P.		female	adult	non-reprodutcive	alcohol	in collection / wet vial	Animalia	Arthropoda	Insecta	Hymenoptera	Formicidae	Strumigenys		Strumigenys Smith, 1860	Smith, 1860	Genus	Ant	Fernandes, I.O. | Souza, J.L.P.	1	Individual
PreservedSpecimen	Jaci-ParanáMD:Km0:2011:1	2017-09-13	Invertebrate Collection of INPA / Environmental monitoring of ants (Hymenoptera: Formicidae) in the influence areas of Santo Antônio Hydroelectric Power-Plant in Rondônia, Brazil		en	Instituto Nacional de Pesquisas da Amazônia (INPA)	INPA		Instituto Nacional de Pesquisas da Amazônia - INPA / Invertebrate Collection		BR:INPA:HYM:000495	Fernandes, I.O. | Souza, J.L.P.		female	adult	non-reprodutcive	alcohol	in collection / wet vial	Animalia	Arthropoda	Insecta	Hymenoptera	Formicidae	Strumigenys	perparva	Strumigenys perparva Brown, 1958	Brown, 1958	Species	Ant	Fernandes, I.O. | Souza, J.L.P.	1	Individual
PreservedSpecimen	IlhaPedras:km1:2011:1	2017-09-13	Invertebrate Collection of INPA / Environmental monitoring of ants (Hymenoptera: Formicidae) in the influence areas of Santo Antônio Hydroelectric Power-Plant in Rondônia, Brazil		en	Instituto Nacional de Pesquisas da Amazônia (INPA)	INPA		Instituto Nacional de Pesquisas da Amazônia - INPA / Invertebrate Collection		BR:INPA:HYM:000496	Fernandes, I.O. | Souza, J.L.P.		female	adult	non-reprodutcive	alcohol	in collection / wet vial	Animalia	Arthropoda	Insecta	Hymenoptera	Formicidae	Strumigenys	perparva	Strumigenys perparva Brown, 1958	Brown, 1958	Species	Ant	Fernandes, I.O. | Souza, J.L.P.	1	Individual
PreservedSpecimen	IlhaBúfalos:km4:2011:1	2017-09-13	Invertebrate Collection of INPA / Environmental monitoring of ants (Hymenoptera: Formicidae) in the influence areas of Santo Antônio Hydroelectric Power-Plant in Rondônia, Brazil		en	Instituto Nacional de Pesquisas da Amazônia (INPA)	INPA		Instituto Nacional de Pesquisas da Amazônia - INPA / Invertebrate Collection		BR:INPA:HYM:000497	Fernandes, I.O. | Souza, J.L.P.		female	adult	non-reprodutcive	alcohol	in collection / wet vial	Animalia	Arthropoda	Insecta	Hymenoptera	Formicidae	Strumigenys	perparva	Strumigenys perparva Brown, 1958	Brown, 1958	Species	Ant	Fernandes, I.O. | Souza, J.L.P.	1	Individual
PreservedSpecimen	IlhaBúfalos:km2:2011:1	2017-09-13	Invertebrate Collection of INPA / Environmental monitoring of ants (Hymenoptera: Formicidae) in the influence areas of Santo Antônio Hydroelectric Power-Plant in Rondônia, Brazil		en	Instituto Nacional de Pesquisas da Amazônia (INPA)	INPA		Instituto Nacional de Pesquisas da Amazônia - INPA / Invertebrate Collection		BR:INPA:HYM:000498	Fernandes, I.O. | Souza, J.L.P.		female	adult	non-reprodutcive	alcohol	in collection / wet vial	Animalia	Arthropoda	Insecta	Hymenoptera	Formicidae	Strumigenys	perparva	Strumigenys perparva Brown, 1958	Brown, 1958	Species	Ant	Fernandes, I.O. | Souza, J.L.P.	1	Individual
PreservedSpecimen	IlhaBúfalos:km3:2011:1	2017-09-13	Invertebrate Collection of INPA / Environmental monitoring of ants (Hymenoptera: Formicidae) in the influence areas of Santo Antônio Hydroelectric Power-Plant in Rondônia, Brazil		en	Instituto Nacional de Pesquisas da Amazônia (INPA)	INPA		Instituto Nacional de Pesquisas da Amazônia - INPA / Invertebrate Collection		BR:INPA:HYM:000499	Fernandes, I.O. | Souza, J.L.P.		female	adult	non-reprodutcive	alcohol	in collection / wet vial	Animalia	Arthropoda	Insecta	Hymenoptera	Formicidae	Strumigenys	perparva	Strumigenys perparva Brown, 1958	Brown, 1958	Species	Ant	Fernandes, I.O. | Souza, J.L.P.	1	Individual
PreservedSpecimen	Jaci-ParanáMD:Km4:2011:1	2017-09-13	Invertebrate Collection of INPA / Environmental monitoring of ants (Hymenoptera: Formicidae) in the influence areas of Santo Antônio Hydroelectric Power-Plant in Rondônia, Brazil		en	Instituto Nacional de Pesquisas da Amazônia (INPA)	INPA		Instituto Nacional de Pesquisas da Amazônia - INPA / Invertebrate Collection		BR:INPA:HYM:000500	Fernandes, I.O. | Souza, J.L.P.		female	adult	non-reprodutcive	alcohol	in collection / wet vial	Animalia	Arthropoda	Insecta	Hymenoptera	Formicidae	Strumigenys	perparva	Strumigenys perparva Brown, 1958	Brown, 1958	Species	Ant	Fernandes, I.O. | Souza, J.L.P.	1	Individual
PreservedSpecimen	Jaci-ParanáMD:Km0:2011:1	2017-09-13	Invertebrate Collection of INPA / Environmental monitoring of ants (Hymenoptera: Formicidae) in the influence areas of Santo Antônio Hydroelectric Power-Plant in Rondônia, Brazil		en	Instituto Nacional de Pesquisas da Amazônia (INPA)	INPA		Instituto Nacional de Pesquisas da Amazônia - INPA / Invertebrate Collection		BR:INPA:HYM:000501	Fernandes, I.O. | Souza, J.L.P.		female	adult	non-reprodutcive	alcohol	in collection / wet vial	Animalia	Arthropoda	Insecta	Hymenoptera	Formicidae	Strumigenys	perparva	Strumigenys perparva Brown, 1958	Brown, 1958	Species	Ant	Fernandes, I.O. | Souza, J.L.P.	1	Individual
PreservedSpecimen	Jaci-ParanáMD:Km1:2011:1	2017-09-13	Invertebrate Collection of INPA / Environmental monitoring of ants (Hymenoptera: Formicidae) in the influence areas of Santo Antônio Hydroelectric Power-Plant in Rondônia, Brazil		en	Instituto Nacional de Pesquisas da Amazônia (INPA)	INPA		Instituto Nacional de Pesquisas da Amazônia - INPA / Invertebrate Collection		BR:INPA:HYM:000502	Fernandes, I.O. | Souza, J.L.P.		female	adult	non-reprodutcive	alcohol	in collection / wet vial	Animalia	Arthropoda	Insecta	Hymenoptera	Formicidae	Strumigenys	perparva	Strumigenys perparva Brown, 1958	Brown, 1958	Species	Ant	Fernandes, I.O. | Souza, J.L.P.	1	Individual
PreservedSpecimen	IlhaBúfalos:km4:2011:1	2017-09-13	Invertebrate Collection of INPA / Environmental monitoring of ants (Hymenoptera: Formicidae) in the influence areas of Santo Antônio Hydroelectric Power-Plant in Rondônia, Brazil		en	Instituto Nacional de Pesquisas da Amazônia (INPA)	INPA		Instituto Nacional de Pesquisas da Amazônia - INPA / Invertebrate Collection		BR:INPA:HYM:000503	Fernandes, I.O. | Souza, J.L.P.		female	adult	non-reprodutcive	alcohol	in collection / wet vial	Animalia	Arthropoda	Insecta	Hymenoptera	Formicidae	Strumigenys	perparva	Strumigenys perparva Brown, 1958	Brown, 1958	Species	Ant	Fernandes, I.O. | Souza, J.L.P.	1	Individual
PreservedSpecimen	IlhaPedras:km4:2011:1	2017-09-13	Invertebrate Collection of INPA / Environmental monitoring of ants (Hymenoptera: Formicidae) in the influence areas of Santo Antônio Hydroelectric Power-Plant in Rondônia, Brazil		en	Instituto Nacional de Pesquisas da Amazônia (INPA)	INPA		Instituto Nacional de Pesquisas da Amazônia - INPA / Invertebrate Collection		BR:INPA:HYM:000504	Fernandes, I.O. | Souza, J.L.P.		female	adult	non-reprodutcive	alcohol	in collection / wet vial	Animalia	Arthropoda	Insecta	Hymenoptera	Formicidae	Strumigenys	perparva	Strumigenys perparva Brown, 1958	Brown, 1958	Species	Ant	Fernandes, I.O. | Souza, J.L.P.	1	Individual
PreservedSpecimen	Jaci-ParanáMD:Km1:2011:1	2017-09-13	Invertebrate Collection of INPA / Environmental monitoring of ants (Hymenoptera: Formicidae) in the influence areas of Santo Antônio Hydroelectric Power-Plant in Rondônia, Brazil		en	Instituto Nacional de Pesquisas da Amazônia (INPA)	INPA		Instituto Nacional de Pesquisas da Amazônia - INPA / Invertebrate Collection		BR:INPA:HYM:000505	Fernandes, I.O. | Souza, J.L.P.		female	adult	non-reprodutcive	alcohol	in collection / wet vial	Animalia	Arthropoda	Insecta	Hymenoptera	Formicidae	Strumigenys	perparva	Strumigenys perparva Brown, 1958	Brown, 1958	Species	Ant	Fernandes, I.O. | Souza, J.L.P.	1	Individual
PreservedSpecimen	Jaci-ParanáMD:Km0:2011:1	2017-09-13	Invertebrate Collection of INPA / Environmental monitoring of ants (Hymenoptera: Formicidae) in the influence areas of Santo Antônio Hydroelectric Power-Plant in Rondônia, Brazil		en	Instituto Nacional de Pesquisas da Amazônia (INPA)	INPA		Instituto Nacional de Pesquisas da Amazônia - INPA / Invertebrate Collection		BR:INPA:HYM:000506	Fernandes, I.O. | Souza, J.L.P.		female	adult	non-reprodutcive	alcohol	in collection / wet vial	Animalia	Arthropoda	Insecta	Hymenoptera	Formicidae	Strumigenys		Strumigenys Smith, 1860	Smith, 1860	Genus	Ant	Fernandes, I.O. | Souza, J.L.P.	1	Individual
PreservedSpecimen	IlhaBúfalos:km2:2011:1	2017-09-13	Invertebrate Collection of INPA / Environmental monitoring of ants (Hymenoptera: Formicidae) in the influence areas of Santo Antônio Hydroelectric Power-Plant in Rondônia, Brazil		en	Instituto Nacional de Pesquisas da Amazônia (INPA)	INPA		Instituto Nacional de Pesquisas da Amazônia - INPA / Invertebrate Collection		BR:INPA:HYM:000507	Fernandes, I.O. | Souza, J.L.P.		female	adult	non-reprodutcive	alcohol	in collection / wet vial	Animalia	Arthropoda	Insecta	Hymenoptera	Formicidae	Strumigenys		Strumigenys Smith, 1860	Smith, 1860	Genus	Ant	Fernandes, I.O. | Souza, J.L.P.	1	Individual
PreservedSpecimen	IlhaBúfalos:km2:2011:1	2017-09-13	Invertebrate Collection of INPA / Environmental monitoring of ants (Hymenoptera: Formicidae) in the influence areas of Santo Antônio Hydroelectric Power-Plant in Rondônia, Brazil		en	Instituto Nacional de Pesquisas da Amazônia (INPA)	INPA		Instituto Nacional de Pesquisas da Amazônia - INPA / Invertebrate Collection		BR:INPA:HYM:000508	Fernandes, I.O. | Souza, J.L.P.		female	adult	non-reprodutcive	alcohol	in collection / wet vial	Animalia	Arthropoda	Insecta	Hymenoptera	Formicidae	Strumigenys		Strumigenys Smith, 1860	Smith, 1860	Genus	Ant	Fernandes, I.O. | Souza, J.L.P.	1	Individual
PreservedSpecimen	Jaci-ParanáMD:Km0:2011:1	2017-09-13	Invertebrate Collection of INPA / Environmental monitoring of ants (Hymenoptera: Formicidae) in the influence areas of Santo Antônio Hydroelectric Power-Plant in Rondônia, Brazil		en	Instituto Nacional de Pesquisas da Amazônia (INPA)	INPA		Instituto Nacional de Pesquisas da Amazônia - INPA / Invertebrate Collection		BR:INPA:HYM:000509	Fernandes, I.O. | Souza, J.L.P.		female	adult	non-reprodutcive	alcohol	in collection / wet vial	Animalia	Arthropoda	Insecta	Hymenoptera	Formicidae	Strumigenys	zeteki	Strumigenys zeteki (Brown, 1959)	(Brown, 1959)	Species	Ant	Fernandes, I.O. | Souza, J.L.P.	1	Individual
PreservedSpecimen	IlhaBúfalos:km1:2011:1	2017-09-13	Invertebrate Collection of INPA / Environmental monitoring of ants (Hymenoptera: Formicidae) in the influence areas of Santo Antônio Hydroelectric Power-Plant in Rondônia, Brazil		en	Instituto Nacional de Pesquisas da Amazônia (INPA)	INPA		Instituto Nacional de Pesquisas da Amazônia - INPA / Invertebrate Collection		BR:INPA:HYM:000510	Fernandes, I.O. | Souza, J.L.P.		female	adult	non-reprodutcive	alcohol	in collection / wet vial	Animalia	Arthropoda	Insecta	Hymenoptera	Formicidae	Strumigenys	zeteki	Strumigenys zeteki (Brown, 1959)	(Brown, 1959)	Species	Ant	Fernandes, I.O. | Souza, J.L.P.	1	Individual
PreservedSpecimen	IlhaPedras:km1:2011:1	2017-09-13	Invertebrate Collection of INPA / Environmental monitoring of ants (Hymenoptera: Formicidae) in the influence areas of Santo Antônio Hydroelectric Power-Plant in Rondônia, Brazil		en	Instituto Nacional de Pesquisas da Amazônia (INPA)	INPA		Instituto Nacional de Pesquisas da Amazônia - INPA / Invertebrate Collection		BR:INPA:HYM:000511	Fernandes, I.O. | Souza, J.L.P.		female	adult	non-reprodutcive	alcohol	in collection / wet vial	Animalia	Arthropoda	Insecta	Hymenoptera	Formicidae	Strumigenys	zeteki	Strumigenys zeteki (Brown, 1959)	(Brown, 1959)	Species	Ant	Fernandes, I.O. | Souza, J.L.P.	1	Individual
PreservedSpecimen	Jaci-ParanáMD:Km1:2011:1	2017-09-13	Invertebrate Collection of INPA / Environmental monitoring of ants (Hymenoptera: Formicidae) in the influence areas of Santo Antônio Hydroelectric Power-Plant in Rondônia, Brazil		en	Instituto Nacional de Pesquisas da Amazônia (INPA)	INPA		Instituto Nacional de Pesquisas da Amazônia - INPA / Invertebrate Collection		BR:INPA:HYM:000512	Fernandes, I.O. | Souza, J.L.P.		female	adult	non-reprodutcive	alcohol	in collection / wet vial	Animalia	Arthropoda	Insecta	Hymenoptera	Formicidae	Strumigenys	zeteki	Strumigenys zeteki (Brown, 1959)	(Brown, 1959)	Species	Ant	Fernandes, I.O. | Souza, J.L.P.	1	Individual
PreservedSpecimen	IlhaPedras:km4:2011:1	2017-09-13	Invertebrate Collection of INPA / Environmental monitoring of ants (Hymenoptera: Formicidae) in the influence areas of Santo Antônio Hydroelectric Power-Plant in Rondônia, Brazil		en	Instituto Nacional de Pesquisas da Amazônia (INPA)	INPA		Instituto Nacional de Pesquisas da Amazônia - INPA / Invertebrate Collection		BR:INPA:HYM:000513	Fernandes, I.O. | Souza, J.L.P.		female	adult	non-reprodutcive	alcohol	in collection / wet vial	Animalia	Arthropoda	Insecta	Hymenoptera	Formicidae	Strumigenys	zeteki	Strumigenys zeteki (Brown, 1959)	(Brown, 1959)	Species	Ant	Fernandes, I.O. | Souza, J.L.P.	1	Individual
PreservedSpecimen	Jaci-ParanáMD:Km4:2011:1	2017-09-13	Invertebrate Collection of INPA / Environmental monitoring of ants (Hymenoptera: Formicidae) in the influence areas of Santo Antônio Hydroelectric Power-Plant in Rondônia, Brazil		en	Instituto Nacional de Pesquisas da Amazônia (INPA)	INPA		Instituto Nacional de Pesquisas da Amazônia - INPA / Invertebrate Collection		BR:INPA:HYM:000514	Fernandes, I.O. | Souza, J.L.P.		female	adult	non-reprodutcive	alcohol	in collection / wet vial	Animalia	Arthropoda	Insecta	Hymenoptera	Formicidae	Strumigenys	zeteki	Strumigenys zeteki (Brown, 1959)	(Brown, 1959)	Species	Ant	Fernandes, I.O. | Souza, J.L.P.	1	Individual
PreservedSpecimen	Jaci-ParanáMD:Km0:2011:1	2017-09-13	Invertebrate Collection of INPA / Environmental monitoring of ants (Hymenoptera: Formicidae) in the influence areas of Santo Antônio Hydroelectric Power-Plant in Rondônia, Brazil		en	Instituto Nacional de Pesquisas da Amazônia (INPA)	INPA		Instituto Nacional de Pesquisas da Amazônia - INPA / Invertebrate Collection		BR:INPA:HYM:000515	Fernandes, I.O. | Souza, J.L.P.		female	adult	non-reprodutcive	alcohol	in collection / wet vial	Animalia	Arthropoda	Insecta	Hymenoptera	Formicidae	Strumigenys	zeteki	Strumigenys zeteki (Brown, 1959)	(Brown, 1959)	Species	Ant	Fernandes, I.O. | Souza, J.L.P.	1	Individual
PreservedSpecimen	IlhaPedras:km2:2011:1	2017-09-13	Invertebrate Collection of INPA / Environmental monitoring of ants (Hymenoptera: Formicidae) in the influence areas of Santo Antônio Hydroelectric Power-Plant in Rondônia, Brazil		en	Instituto Nacional de Pesquisas da Amazônia (INPA)	INPA		Instituto Nacional de Pesquisas da Amazônia - INPA / Invertebrate Collection		BR:INPA:HYM:000516	Fernandes, I.O. | Souza, J.L.P.		female	adult	non-reprodutcive	alcohol	in collection / wet vial	Animalia	Arthropoda	Insecta	Hymenoptera	Formicidae	Strumigenys	zeteki	Strumigenys zeteki (Brown, 1959)	(Brown, 1959)	Species	Ant	Fernandes, I.O. | Souza, J.L.P.	1	Individual
PreservedSpecimen	Jaci-ParanáMD:Km0.5:2011:1	2017-09-13	Invertebrate Collection of INPA / Environmental monitoring of ants (Hymenoptera: Formicidae) in the influence areas of Santo Antônio Hydroelectric Power-Plant in Rondônia, Brazil		en	Instituto Nacional de Pesquisas da Amazônia (INPA)	INPA		Instituto Nacional de Pesquisas da Amazônia - INPA / Invertebrate Collection		BR:INPA:HYM:000517	Fernandes, I.O. | Souza, J.L.P.		female	adult	non-reprodutcive	alcohol	in collection / wet vial	Animalia	Arthropoda	Insecta	Hymenoptera	Formicidae	Strumigenys	zeteki	Strumigenys zeteki (Brown, 1959)	(Brown, 1959)	Species	Ant	Fernandes, I.O. | Souza, J.L.P.	1	Individual
PreservedSpecimen	Jaci-ParanáMD:Km1:2011:1	2017-09-13	Invertebrate Collection of INPA / Environmental monitoring of ants (Hymenoptera: Formicidae) in the influence areas of Santo Antônio Hydroelectric Power-Plant in Rondônia, Brazil		en	Instituto Nacional de Pesquisas da Amazônia (INPA)	INPA		Instituto Nacional de Pesquisas da Amazônia - INPA / Invertebrate Collection		BR:INPA:HYM:000518	Fernandes, I.O. | Souza, J.L.P.		female	adult	non-reprodutcive	alcohol	in collection / wet vial	Animalia	Arthropoda	Insecta	Hymenoptera	Formicidae	Strumigenys	zeteki	Strumigenys zeteki (Brown, 1959)	(Brown, 1959)	Species	Ant	Fernandes, I.O. | Souza, J.L.P.	1	Individual
PreservedSpecimen	IlhaPedras:km2:2011:1	2017-09-13	Invertebrate Collection of INPA / Environmental monitoring of ants (Hymenoptera: Formicidae) in the influence areas of Santo Antônio Hydroelectric Power-Plant in Rondônia, Brazil		en	Instituto Nacional de Pesquisas da Amazônia (INPA)	INPA		Instituto Nacional de Pesquisas da Amazônia - INPA / Invertebrate Collection		BR:INPA:HYM:000519	Fernandes, I.O. | Souza, J.L.P.		female	adult	non-reprodutcive	alcohol	in collection / wet vial	Animalia	Arthropoda	Insecta	Hymenoptera	Formicidae	Strumigenys	zeteki	Strumigenys zeteki (Brown, 1959)	(Brown, 1959)	Species	Ant	Fernandes, I.O. | Souza, J.L.P.	1	Individual
PreservedSpecimen	Jaci-ParanáMD:Km2:2011:1	2017-09-13	Invertebrate Collection of INPA / Environmental monitoring of ants (Hymenoptera: Formicidae) in the influence areas of Santo Antônio Hydroelectric Power-Plant in Rondônia, Brazil		en	Instituto Nacional de Pesquisas da Amazônia (INPA)	INPA		Instituto Nacional de Pesquisas da Amazônia - INPA / Invertebrate Collection		BR:INPA:HYM:000520	Fernandes, I.O. | Souza, J.L.P.		female	adult	non-reprodutcive	alcohol	in collection / wet vial	Animalia	Arthropoda	Insecta	Hymenoptera	Formicidae	Strumigenys	zeteki	Strumigenys zeteki (Brown, 1959)	(Brown, 1959)	Species	Ant	Fernandes, I.O. | Souza, J.L.P.	1	Individual
PreservedSpecimen	Jaci-ParanáMD:Km3:2011:1	2017-09-13	Invertebrate Collection of INPA / Environmental monitoring of ants (Hymenoptera: Formicidae) in the influence areas of Santo Antônio Hydroelectric Power-Plant in Rondônia, Brazil		en	Instituto Nacional de Pesquisas da Amazônia (INPA)	INPA		Instituto Nacional de Pesquisas da Amazônia - INPA / Invertebrate Collection		BR:INPA:HYM:000521	Fernandes, I.O. | Souza, J.L.P.		female	adult	non-reprodutcive	alcohol	in collection / wet vial	Animalia	Arthropoda	Insecta	Hymenoptera	Formicidae	Strumigenys	zeteki	Strumigenys zeteki (Brown, 1959)	(Brown, 1959)	Species	Ant	Fernandes, I.O. | Souza, J.L.P.	1	Individual
PreservedSpecimen	IlhaBúfalos:km4:2011:1	2017-09-13	Invertebrate Collection of INPA / Environmental monitoring of ants (Hymenoptera: Formicidae) in the influence areas of Santo Antônio Hydroelectric Power-Plant in Rondônia, Brazil		en	Instituto Nacional de Pesquisas da Amazônia (INPA)	INPA		Instituto Nacional de Pesquisas da Amazônia - INPA / Invertebrate Collection		BR:INPA:HYM:000522	Fernandes, I.O. | Souza, J.L.P.		female	adult	non-reprodutcive	alcohol	in collection / wet vial	Animalia	Arthropoda	Insecta	Hymenoptera	Formicidae	Strumigenys	zeteki	Strumigenys zeteki (Brown, 1959)	(Brown, 1959)	Species	Ant	Fernandes, I.O. | Souza, J.L.P.	1	Individual
PreservedSpecimen	IlhaPedras:km4:2011:1	2017-09-13	Invertebrate Collection of INPA / Environmental monitoring of ants (Hymenoptera: Formicidae) in the influence areas of Santo Antônio Hydroelectric Power-Plant in Rondônia, Brazil		en	Instituto Nacional de Pesquisas da Amazônia (INPA)	INPA		Instituto Nacional de Pesquisas da Amazônia - INPA / Invertebrate Collection		BR:INPA:HYM:000523	Fernandes, I.O. | Souza, J.L.P.		female	adult	non-reprodutcive	alcohol	in collection / wet vial	Animalia	Arthropoda	Insecta	Hymenoptera	Formicidae	Strumigenys	zeteki	Strumigenys zeteki (Brown, 1959)	(Brown, 1959)	Species	Ant	Fernandes, I.O. | Souza, J.L.P.	1	Individual
PreservedSpecimen	Morrinhos:Km4:2011:1	2017-09-13	Invertebrate Collection of INPA / Environmental monitoring of ants (Hymenoptera: Formicidae) in the influence areas of Santo Antônio Hydroelectric Power-Plant in Rondônia, Brazil		en	Instituto Nacional de Pesquisas da Amazônia (INPA)	INPA		Instituto Nacional de Pesquisas da Amazônia - INPA / Invertebrate Collection		BR:INPA:HYM:000524	Fernandes, I.O. | Souza, J.L.P.		female	adult	non-reprodutcive	alcohol	in collection / wet vial	Animalia	Arthropoda	Insecta	Hymenoptera	Formicidae	Strumigenys	zeteki	Strumigenys zeteki (Brown, 1959)	(Brown, 1959)	Species	Ant	Fernandes, I.O. | Souza, J.L.P.	1	Individual
PreservedSpecimen	Morrinhos:Km4:2011:1	2017-09-13	Invertebrate Collection of INPA / Environmental monitoring of ants (Hymenoptera: Formicidae) in the influence areas of Santo Antônio Hydroelectric Power-Plant in Rondônia, Brazil		en	Instituto Nacional de Pesquisas da Amazônia (INPA)	INPA		Instituto Nacional de Pesquisas da Amazônia - INPA / Invertebrate Collection		BR:INPA:HYM:000525	Fernandes, I.O. | Souza, J.L.P.		female	adult	non-reprodutcive	alcohol	in collection / wet vial	Animalia	Arthropoda	Insecta	Hymenoptera	Formicidae	Strumigenys	zeteki	Strumigenys zeteki (Brown, 1959)	(Brown, 1959)	Species	Ant	Fernandes, I.O. | Souza, J.L.P.	1	Individual
PreservedSpecimen	IlhaBúfalos:km0.5:2011:1	2017-09-13	Invertebrate Collection of INPA / Environmental monitoring of ants (Hymenoptera: Formicidae) in the influence areas of Santo Antônio Hydroelectric Power-Plant in Rondônia, Brazil		en	Instituto Nacional de Pesquisas da Amazônia (INPA)	INPA		Instituto Nacional de Pesquisas da Amazônia - INPA / Invertebrate Collection		BR:INPA:HYM:000526	Fernandes, I.O. | Souza, J.L.P.		female	adult	non-reprodutcive	alcohol	in collection / wet vial	Animalia	Arthropoda	Insecta	Hymenoptera	Formicidae	Strumigenys	zeteki	Strumigenys zeteki (Brown, 1959)	(Brown, 1959)	Species	Ant	Fernandes, I.O. | Souza, J.L.P.	1	Individual
PreservedSpecimen	IlhaBúfalos:km1:2011:1	2017-09-13	Invertebrate Collection of INPA / Environmental monitoring of ants (Hymenoptera: Formicidae) in the influence areas of Santo Antônio Hydroelectric Power-Plant in Rondônia, Brazil		en	Instituto Nacional de Pesquisas da Amazônia (INPA)	INPA		Instituto Nacional de Pesquisas da Amazônia - INPA / Invertebrate Collection		BR:INPA:HYM:000527	Fernandes, I.O. | Souza, J.L.P.		female	adult	non-reprodutcive	alcohol	in collection / wet vial	Animalia	Arthropoda	Insecta	Hymenoptera	Formicidae	Strumigenys	zeteki	Strumigenys zeteki (Brown, 1959)	(Brown, 1959)	Species	Ant	Fernandes, I.O. | Souza, J.L.P.	1	Individual
PreservedSpecimen	IlhaPedras:km1:2011:1	2017-09-13	Invertebrate Collection of INPA / Environmental monitoring of ants (Hymenoptera: Formicidae) in the influence areas of Santo Antônio Hydroelectric Power-Plant in Rondônia, Brazil		en	Instituto Nacional de Pesquisas da Amazônia (INPA)	INPA		Instituto Nacional de Pesquisas da Amazônia - INPA / Invertebrate Collection		BR:INPA:HYM:000528	Fernandes, I.O. | Souza, J.L.P.		female	adult	non-reprodutcive	alcohol	in collection / wet vial	Animalia	Arthropoda	Insecta	Hymenoptera	Formicidae	Strumigenys	zeteki	Strumigenys zeteki (Brown, 1959)	(Brown, 1959)	Species	Ant	Fernandes, I.O. | Souza, J.L.P.	1	Individual
PreservedSpecimen	Morrinhos:Km1:2011:1	2017-09-13	Invertebrate Collection of INPA / Environmental monitoring of ants (Hymenoptera: Formicidae) in the influence areas of Santo Antônio Hydroelectric Power-Plant in Rondônia, Brazil		en	Instituto Nacional de Pesquisas da Amazônia (INPA)	INPA		Instituto Nacional de Pesquisas da Amazônia - INPA / Invertebrate Collection		BR:INPA:HYM:000529	Fernandes, I.O. | Souza, J.L.P.		female	adult	non-reprodutcive	alcohol	in collection / wet vial	Animalia	Arthropoda	Insecta	Hymenoptera	Formicidae	Strumigenys	zeteki	Strumigenys zeteki (Brown, 1959)	(Brown, 1959)	Species	Ant	Fernandes, I.O. | Souza, J.L.P.	1	Individual
PreservedSpecimen	IlhaPedras:km3:2011:1	2017-09-13	Invertebrate Collection of INPA / Environmental monitoring of ants (Hymenoptera: Formicidae) in the influence areas of Santo Antônio Hydroelectric Power-Plant in Rondônia, Brazil		en	Instituto Nacional de Pesquisas da Amazônia (INPA)	INPA		Instituto Nacional de Pesquisas da Amazônia - INPA / Invertebrate Collection		BR:INPA:HYM:000530	Fernandes, I.O. | Souza, J.L.P.		female	adult	non-reprodutcive	alcohol	in collection / wet vial	Animalia	Arthropoda	Insecta	Hymenoptera	Formicidae	Strumigenys	zeteki	Strumigenys zeteki (Brown, 1959)	(Brown, 1959)	Species	Ant	Fernandes, I.O. | Souza, J.L.P.	1	Individual
PreservedSpecimen	Morrinhos:Km4:2011:1	2017-09-13	Invertebrate Collection of INPA / Environmental monitoring of ants (Hymenoptera: Formicidae) in the influence areas of Santo Antônio Hydroelectric Power-Plant in Rondônia, Brazil		en	Instituto Nacional de Pesquisas da Amazônia (INPA)	INPA		Instituto Nacional de Pesquisas da Amazônia - INPA / Invertebrate Collection		BR:INPA:HYM:000531	Fernandes, I.O. | Souza, J.L.P.		female	adult	non-reprodutcive	alcohol	in collection / wet vial	Animalia	Arthropoda	Insecta	Hymenoptera	Formicidae	Strumigenys	zeteki	Strumigenys zeteki (Brown, 1959)	(Brown, 1959)	Species	Ant	Fernandes, I.O. | Souza, J.L.P.	1	Individual
PreservedSpecimen	Jaci-ParanáMD:Km0.5:2011:1	2017-09-13	Invertebrate Collection of INPA / Environmental monitoring of ants (Hymenoptera: Formicidae) in the influence areas of Santo Antônio Hydroelectric Power-Plant in Rondônia, Brazil		en	Instituto Nacional de Pesquisas da Amazônia (INPA)	INPA		Instituto Nacional de Pesquisas da Amazônia - INPA / Invertebrate Collection		BR:INPA:HYM:000532	Fernandes, I.O. | Souza, J.L.P.		female	adult	non-reprodutcive	alcohol	in collection / wet vial	Animalia	Arthropoda	Insecta	Hymenoptera	Formicidae	Strumigenys	zeteki	Strumigenys zeteki (Brown, 1959)	(Brown, 1959)	Species	Ant	Fernandes, I.O. | Souza, J.L.P.	1	Individual
PreservedSpecimen	Morrinhos:Km0.5:2011:1	2017-09-13	Invertebrate Collection of INPA / Environmental monitoring of ants (Hymenoptera: Formicidae) in the influence areas of Santo Antônio Hydroelectric Power-Plant in Rondônia, Brazil		en	Instituto Nacional de Pesquisas da Amazônia (INPA)	INPA		Instituto Nacional de Pesquisas da Amazônia - INPA / Invertebrate Collection		BR:INPA:HYM:000533	Fernandes, I.O. | Souza, J.L.P.		female	adult	non-reprodutcive	alcohol	in collection / wet vial	Animalia	Arthropoda	Insecta	Hymenoptera	Formicidae	Strumigenys	zeteki	Strumigenys zeteki (Brown, 1959)	(Brown, 1959)	Species	Ant	Fernandes, I.O. | Souza, J.L.P.	1	Individual
PreservedSpecimen	Jaci-ParanáMD:Km1:2011:1	2017-09-13	Invertebrate Collection of INPA / Environmental monitoring of ants (Hymenoptera: Formicidae) in the influence areas of Santo Antônio Hydroelectric Power-Plant in Rondônia, Brazil		en	Instituto Nacional de Pesquisas da Amazônia (INPA)	INPA		Instituto Nacional de Pesquisas da Amazônia - INPA / Invertebrate Collection		BR:INPA:HYM:000534	Fernandes, I.O. | Souza, J.L.P.		female	adult	non-reprodutcive	alcohol	in collection / wet vial	Animalia	Arthropoda	Insecta	Hymenoptera	Formicidae	Strumigenys	zeteki	Strumigenys zeteki (Brown, 1959)	(Brown, 1959)	Species	Ant	Fernandes, I.O. | Souza, J.L.P.	1	Individual
PreservedSpecimen	IlhaPedras:km2:2011:1	2017-09-13	Invertebrate Collection of INPA / Environmental monitoring of ants (Hymenoptera: Formicidae) in the influence areas of Santo Antônio Hydroelectric Power-Plant in Rondônia, Brazil		en	Instituto Nacional de Pesquisas da Amazônia (INPA)	INPA		Instituto Nacional de Pesquisas da Amazônia - INPA / Invertebrate Collection		BR:INPA:HYM:000535	Fernandes, I.O. | Souza, J.L.P.		female	adult	non-reprodutcive	alcohol	in collection / wet vial	Animalia	Arthropoda	Insecta	Hymenoptera	Formicidae	Strumigenys	zeteki	Strumigenys zeteki (Brown, 1959)	(Brown, 1959)	Species	Ant	Fernandes, I.O. | Souza, J.L.P.	1	Individual
PreservedSpecimen	IlhaPedras:km3:2011:1	2017-09-13	Invertebrate Collection of INPA / Environmental monitoring of ants (Hymenoptera: Formicidae) in the influence areas of Santo Antônio Hydroelectric Power-Plant in Rondônia, Brazil		en	Instituto Nacional de Pesquisas da Amazônia (INPA)	INPA		Instituto Nacional de Pesquisas da Amazônia - INPA / Invertebrate Collection		BR:INPA:HYM:000536	Fernandes, I.O. | Souza, J.L.P.		female	adult	non-reprodutcive	alcohol	in collection / wet vial	Animalia	Arthropoda	Insecta	Hymenoptera	Formicidae	Strumigenys	zeteki	Strumigenys zeteki (Brown, 1959)	(Brown, 1959)	Species	Ant	Fernandes, I.O. | Souza, J.L.P.	1	Individual
PreservedSpecimen	Jaci-ParanáMD:Km3:2011:1	2017-09-13	Invertebrate Collection of INPA / Environmental monitoring of ants (Hymenoptera: Formicidae) in the influence areas of Santo Antônio Hydroelectric Power-Plant in Rondônia, Brazil		en	Instituto Nacional de Pesquisas da Amazônia (INPA)	INPA		Instituto Nacional de Pesquisas da Amazônia - INPA / Invertebrate Collection		BR:INPA:HYM:000537	Fernandes, I.O. | Souza, J.L.P.		female	adult	non-reprodutcive	alcohol	in collection / wet vial	Animalia	Arthropoda	Insecta	Hymenoptera	Formicidae	Strumigenys	zeteki	Strumigenys zeteki (Brown, 1959)	(Brown, 1959)	Species	Ant	Fernandes, I.O. | Souza, J.L.P.	1	Individual
PreservedSpecimen	IlhaPedras:km3:2011:1	2017-09-13	Invertebrate Collection of INPA / Environmental monitoring of ants (Hymenoptera: Formicidae) in the influence areas of Santo Antônio Hydroelectric Power-Plant in Rondônia, Brazil		en	Instituto Nacional de Pesquisas da Amazônia (INPA)	INPA		Instituto Nacional de Pesquisas da Amazônia - INPA / Invertebrate Collection		BR:INPA:HYM:000538	Fernandes, I.O. | Souza, J.L.P.		female	adult	non-reprodutcive	alcohol	in collection / wet vial	Animalia	Arthropoda	Insecta	Hymenoptera	Formicidae	Rogeria		Rogeria Emery, 1894	Emery, 1894	Genus	Ant	Fernandes, I.O. | Souza, J.L.P.	1	Individual
PreservedSpecimen	IlhaBúfalos:km4:2011:1	2017-09-13	Invertebrate Collection of INPA / Environmental monitoring of ants (Hymenoptera: Formicidae) in the influence areas of Santo Antônio Hydroelectric Power-Plant in Rondônia, Brazil		en	Instituto Nacional de Pesquisas da Amazônia (INPA)	INPA		Instituto Nacional de Pesquisas da Amazônia - INPA / Invertebrate Collection		BR:INPA:HYM:000539	Fernandes, I.O. | Souza, J.L.P.		female	adult	non-reprodutcive	alcohol	in collection / wet vial	Animalia	Arthropoda	Insecta	Hymenoptera	Formicidae	Rogeria		Rogeria Emery, 1894	Emery, 1894	Genus	Ant	Fernandes, I.O. | Souza, J.L.P.	1	Individual
PreservedSpecimen	IlhaBúfalos:km3:2011:1	2017-09-13	Invertebrate Collection of INPA / Environmental monitoring of ants (Hymenoptera: Formicidae) in the influence areas of Santo Antônio Hydroelectric Power-Plant in Rondônia, Brazil		en	Instituto Nacional de Pesquisas da Amazônia (INPA)	INPA		Instituto Nacional de Pesquisas da Amazônia - INPA / Invertebrate Collection		BR:INPA:HYM:000540	Fernandes, I.O. | Souza, J.L.P.		female	adult	non-reprodutcive	alcohol	in collection / wet vial	Animalia	Arthropoda	Insecta	Hymenoptera	Formicidae	Rogeria		Rogeria Emery, 1894	Emery, 1894	Genus	Ant	Fernandes, I.O. | Souza, J.L.P.	1	Individual
PreservedSpecimen	IlhaBúfalos:km1:2011:1	2017-09-13	Invertebrate Collection of INPA / Environmental monitoring of ants (Hymenoptera: Formicidae) in the influence areas of Santo Antônio Hydroelectric Power-Plant in Rondônia, Brazil		en	Instituto Nacional de Pesquisas da Amazônia (INPA)	INPA		Instituto Nacional de Pesquisas da Amazônia - INPA / Invertebrate Collection		BR:INPA:HYM:000541	Fernandes, I.O. | Souza, J.L.P.		female	adult	non-reprodutcive	alcohol	in collection / wet vial	Animalia	Arthropoda	Insecta	Hymenoptera	Formicidae	Rogeria		Rogeria Emery, 1894	Emery, 1894	Genus	Ant	Fernandes, I.O. | Souza, J.L.P.	1	Individual
PreservedSpecimen	IlhaPedras:km2:2011:1	2017-09-13	Invertebrate Collection of INPA / Environmental monitoring of ants (Hymenoptera: Formicidae) in the influence areas of Santo Antônio Hydroelectric Power-Plant in Rondônia, Brazil		en	Instituto Nacional de Pesquisas da Amazônia (INPA)	INPA		Instituto Nacional de Pesquisas da Amazônia - INPA / Invertebrate Collection		BR:INPA:HYM:000542	Fernandes, I.O. | Souza, J.L.P.		female	adult	non-reprodutcive	alcohol	in collection / wet vial	Animalia	Arthropoda	Insecta	Hymenoptera	Formicidae	Rogeria		Rogeria Emery, 1894	Emery, 1894	Genus	Ant	Fernandes, I.O. | Souza, J.L.P.	1	Individual
PreservedSpecimen	IlhaPedras:km3:2011:1	2017-09-13	Invertebrate Collection of INPA / Environmental monitoring of ants (Hymenoptera: Formicidae) in the influence areas of Santo Antônio Hydroelectric Power-Plant in Rondônia, Brazil		en	Instituto Nacional de Pesquisas da Amazônia (INPA)	INPA		Instituto Nacional de Pesquisas da Amazônia - INPA / Invertebrate Collection		BR:INPA:HYM:000543	Fernandes, I.O. | Souza, J.L.P.		female	adult	non-reprodutcive	alcohol	in collection / wet vial	Animalia	Arthropoda	Insecta	Hymenoptera	Formicidae	Rogeria		Rogeria Emery, 1894	Emery, 1894	Genus	Ant	Fernandes, I.O. | Souza, J.L.P.	1	Individual
PreservedSpecimen	Jaci-ParanáMD:Km1:2011:1	2017-09-13	Invertebrate Collection of INPA / Environmental monitoring of ants (Hymenoptera: Formicidae) in the influence areas of Santo Antônio Hydroelectric Power-Plant in Rondônia, Brazil		en	Instituto Nacional de Pesquisas da Amazônia (INPA)	INPA		Instituto Nacional de Pesquisas da Amazônia - INPA / Invertebrate Collection		BR:INPA:HYM:000544	Fernandes, I.O. | Souza, J.L.P.		female	adult	non-reprodutcive	alcohol	in collection / wet vial	Animalia	Arthropoda	Insecta	Hymenoptera	Formicidae	Rogeria		Rogeria Emery, 1894	Emery, 1894	Genus	Ant	Fernandes, I.O. | Souza, J.L.P.	1	Individual
PreservedSpecimen	IlhaBúfalos:km2:2011:1	2017-09-13	Invertebrate Collection of INPA / Environmental monitoring of ants (Hymenoptera: Formicidae) in the influence areas of Santo Antônio Hydroelectric Power-Plant in Rondônia, Brazil		en	Instituto Nacional de Pesquisas da Amazônia (INPA)	INPA		Instituto Nacional de Pesquisas da Amazônia - INPA / Invertebrate Collection		BR:INPA:HYM:000545	Fernandes, I.O. | Souza, J.L.P.		female	adult	non-reprodutcive	alcohol	in collection / wet vial	Animalia	Arthropoda	Insecta	Hymenoptera	Formicidae	Rogeria		Rogeria Emery, 1894	Emery, 1894	Genus	Ant	Fernandes, I.O. | Souza, J.L.P.	1	Individual
PreservedSpecimen	IlhaPedras:km2:2011:1	2017-09-13	Invertebrate Collection of INPA / Environmental monitoring of ants (Hymenoptera: Formicidae) in the influence areas of Santo Antônio Hydroelectric Power-Plant in Rondônia, Brazil		en	Instituto Nacional de Pesquisas da Amazônia (INPA)	INPA		Instituto Nacional de Pesquisas da Amazônia - INPA / Invertebrate Collection		BR:INPA:HYM:000546	Fernandes, I.O. | Souza, J.L.P.		female	adult	non-reprodutcive	alcohol	in collection / wet vial	Animalia	Arthropoda	Insecta	Hymenoptera	Formicidae	Rogeria		Rogeria Emery, 1894	Emery, 1894	Genus	Ant	Fernandes, I.O. | Souza, J.L.P.	1	Individual
PreservedSpecimen	Jaci-ParanáMD:Km4:2011:1	2017-09-13	Invertebrate Collection of INPA / Environmental monitoring of ants (Hymenoptera: Formicidae) in the influence areas of Santo Antônio Hydroelectric Power-Plant in Rondônia, Brazil		en	Instituto Nacional de Pesquisas da Amazônia (INPA)	INPA		Instituto Nacional de Pesquisas da Amazônia - INPA / Invertebrate Collection		BR:INPA:HYM:000547	Fernandes, I.O. | Souza, J.L.P.		female	adult	non-reprodutcive	alcohol	in collection / wet vial	Animalia	Arthropoda	Insecta	Hymenoptera	Formicidae	Rogeria		Rogeria Emery, 1894	Emery, 1894	Genus	Ant	Fernandes, I.O. | Souza, J.L.P.	1	Individual
PreservedSpecimen	IlhaBúfalos:km2:2011:1	2017-09-13	Invertebrate Collection of INPA / Environmental monitoring of ants (Hymenoptera: Formicidae) in the influence areas of Santo Antônio Hydroelectric Power-Plant in Rondônia, Brazil		en	Instituto Nacional de Pesquisas da Amazônia (INPA)	INPA		Instituto Nacional de Pesquisas da Amazônia - INPA / Invertebrate Collection		BR:INPA:HYM:000548	Fernandes, I.O. | Souza, J.L.P.		female	adult	non-reprodutcive	alcohol	in collection / wet vial	Animalia	Arthropoda	Insecta	Hymenoptera	Formicidae	Rogeria		Rogeria Emery, 1894	Emery, 1894	Genus	Ant	Fernandes, I.O. | Souza, J.L.P.	1	Individual
PreservedSpecimen	Jaci-ParanáMD:Km2:2011:1	2017-09-13	Invertebrate Collection of INPA / Environmental monitoring of ants (Hymenoptera: Formicidae) in the influence areas of Santo Antônio Hydroelectric Power-Plant in Rondônia, Brazil		en	Instituto Nacional de Pesquisas da Amazônia (INPA)	INPA		Instituto Nacional de Pesquisas da Amazônia - INPA / Invertebrate Collection		BR:INPA:HYM:000549	Fernandes, I.O. | Souza, J.L.P.		female	adult	non-reprodutcive	alcohol	in collection / wet vial	Animalia	Arthropoda	Insecta	Hymenoptera	Formicidae	Rogeria		Rogeria Emery, 1894	Emery, 1894	Genus	Ant	Fernandes, I.O. | Souza, J.L.P.	1	Individual
PreservedSpecimen	Jaci-ParanáMD:Km4:2011:1	2017-09-13	Invertebrate Collection of INPA / Environmental monitoring of ants (Hymenoptera: Formicidae) in the influence areas of Santo Antônio Hydroelectric Power-Plant in Rondônia, Brazil		en	Instituto Nacional de Pesquisas da Amazônia (INPA)	INPA		Instituto Nacional de Pesquisas da Amazônia - INPA / Invertebrate Collection		BR:INPA:HYM:000550	Fernandes, I.O. | Souza, J.L.P.		female	adult	non-reprodutcive	alcohol	in collection / wet vial	Animalia	Arthropoda	Insecta	Hymenoptera	Formicidae	Rogeria		Rogeria Emery, 1894	Emery, 1894	Genus	Ant	Fernandes, I.O. | Souza, J.L.P.	1	Individual
PreservedSpecimen	IlhaPedras:km0.5:2011:1	2017-09-13	Invertebrate Collection of INPA / Environmental monitoring of ants (Hymenoptera: Formicidae) in the influence areas of Santo Antônio Hydroelectric Power-Plant in Rondônia, Brazil		en	Instituto Nacional de Pesquisas da Amazônia (INPA)	INPA		Instituto Nacional de Pesquisas da Amazônia - INPA / Invertebrate Collection		BR:INPA:HYM:000551	Fernandes, I.O. | Souza, J.L.P.		female	adult	non-reprodutcive	alcohol	in collection / wet vial	Animalia	Arthropoda	Insecta	Hymenoptera	Formicidae	Rogeria		Rogeria Emery, 1894	Emery, 1894	Genus	Ant	Fernandes, I.O. | Souza, J.L.P.	1	Individual
PreservedSpecimen	IlhaPedras:km1:2011:1	2017-09-13	Invertebrate Collection of INPA / Environmental monitoring of ants (Hymenoptera: Formicidae) in the influence areas of Santo Antônio Hydroelectric Power-Plant in Rondônia, Brazil		en	Instituto Nacional de Pesquisas da Amazônia (INPA)	INPA		Instituto Nacional de Pesquisas da Amazônia - INPA / Invertebrate Collection		BR:INPA:HYM:000552	Fernandes, I.O. | Souza, J.L.P.		female	adult	non-reprodutcive	alcohol	in collection / wet vial	Animalia	Arthropoda	Insecta	Hymenoptera	Formicidae	Rogeria		Rogeria Emery, 1894	Emery, 1894	Genus	Ant	Fernandes, I.O. | Souza, J.L.P.	1	Individual
PreservedSpecimen	IlhaBúfalos:km4:2011:1	2017-09-13	Invertebrate Collection of INPA / Environmental monitoring of ants (Hymenoptera: Formicidae) in the influence areas of Santo Antônio Hydroelectric Power-Plant in Rondônia, Brazil		en	Instituto Nacional de Pesquisas da Amazônia (INPA)	INPA		Instituto Nacional de Pesquisas da Amazônia - INPA / Invertebrate Collection		BR:INPA:HYM:000553	Fernandes, I.O. | Souza, J.L.P.		female	adult	non-reprodutcive	alcohol	in collection / wet vial	Animalia	Arthropoda	Insecta	Hymenoptera	Formicidae	Rogeria		Rogeria Emery, 1894	Emery, 1894	Genus	Ant	Fernandes, I.O. | Souza, J.L.P.	1	Individual
PreservedSpecimen	Jaci-ParanáMD:Km1:2011:1	2017-09-13	Invertebrate Collection of INPA / Environmental monitoring of ants (Hymenoptera: Formicidae) in the influence areas of Santo Antônio Hydroelectric Power-Plant in Rondônia, Brazil		en	Instituto Nacional de Pesquisas da Amazônia (INPA)	INPA		Instituto Nacional de Pesquisas da Amazônia - INPA / Invertebrate Collection		BR:INPA:HYM:000554	Fernandes, I.O. | Souza, J.L.P.		female	adult	non-reprodutcive	alcohol	in collection / wet vial	Animalia	Arthropoda	Insecta	Hymenoptera	Formicidae	Rogeria		Rogeria Emery, 1894	Emery, 1894	Genus	Ant	Fernandes, I.O. | Souza, J.L.P.	1	Individual
PreservedSpecimen	IlhaPedras:km2:2011:1	2017-09-13	Invertebrate Collection of INPA / Environmental monitoring of ants (Hymenoptera: Formicidae) in the influence areas of Santo Antônio Hydroelectric Power-Plant in Rondônia, Brazil		en	Instituto Nacional de Pesquisas da Amazônia (INPA)	INPA		Instituto Nacional de Pesquisas da Amazônia - INPA / Invertebrate Collection		BR:INPA:HYM:000555	Fernandes, I.O. | Souza, J.L.P.		female	adult	non-reprodutcive	alcohol	in collection / wet vial	Animalia	Arthropoda	Insecta	Hymenoptera	Formicidae	Rogeria		Rogeria Emery, 1894	Emery, 1894	Genus	Ant	Fernandes, I.O. | Souza, J.L.P.	1	Individual
PreservedSpecimen	IlhaBúfalos:km1:2011:1	2017-09-13	Invertebrate Collection of INPA / Environmental monitoring of ants (Hymenoptera: Formicidae) in the influence areas of Santo Antônio Hydroelectric Power-Plant in Rondônia, Brazil		en	Instituto Nacional de Pesquisas da Amazônia (INPA)	INPA		Instituto Nacional de Pesquisas da Amazônia - INPA / Invertebrate Collection		BR:INPA:HYM:000556	Fernandes, I.O. | Souza, J.L.P.		female	adult	non-reprodutcive	alcohol	in collection / wet vial	Animalia	Arthropoda	Insecta	Hymenoptera	Formicidae	Rogeria		Rogeria Emery, 1894	Emery, 1894	Genus	Ant	Fernandes, I.O. | Souza, J.L.P.	1	Individual
PreservedSpecimen	Jaci-ParanáMD:Km1:2011:1	2017-09-13	Invertebrate Collection of INPA / Environmental monitoring of ants (Hymenoptera: Formicidae) in the influence areas of Santo Antônio Hydroelectric Power-Plant in Rondônia, Brazil		en	Instituto Nacional de Pesquisas da Amazônia (INPA)	INPA		Instituto Nacional de Pesquisas da Amazônia - INPA / Invertebrate Collection		BR:INPA:HYM:000557	Fernandes, I.O. | Souza, J.L.P.		female	adult	non-reprodutcive	alcohol	in collection / wet vial	Animalia	Arthropoda	Insecta	Hymenoptera	Formicidae	Rogeria		Rogeria Emery, 1894	Emery, 1894	Genus	Ant	Fernandes, I.O. | Souza, J.L.P.	1	Individual
PreservedSpecimen	Jaci-ParanáMD:Km1:2011:1	2017-09-13	Invertebrate Collection of INPA / Environmental monitoring of ants (Hymenoptera: Formicidae) in the influence areas of Santo Antônio Hydroelectric Power-Plant in Rondônia, Brazil		en	Instituto Nacional de Pesquisas da Amazônia (INPA)	INPA		Instituto Nacional de Pesquisas da Amazônia - INPA / Invertebrate Collection		BR:INPA:HYM:000558	Fernandes, I.O. | Souza, J.L.P.		female	adult	non-reprodutcive	alcohol	in collection / wet vial	Animalia	Arthropoda	Insecta	Hymenoptera	Formicidae	Rogeria		Rogeria Emery, 1894	Emery, 1894	Genus	Ant	Fernandes, I.O. | Souza, J.L.P.	1	Individual
PreservedSpecimen	IlhaPedras:km3:2011:1	2017-09-13	Invertebrate Collection of INPA / Environmental monitoring of ants (Hymenoptera: Formicidae) in the influence areas of Santo Antônio Hydroelectric Power-Plant in Rondônia, Brazil		en	Instituto Nacional de Pesquisas da Amazônia (INPA)	INPA		Instituto Nacional de Pesquisas da Amazônia - INPA / Invertebrate Collection		BR:INPA:HYM:000559	Fernandes, I.O. | Souza, J.L.P.		female	adult	non-reprodutcive	alcohol	in collection / wet vial	Animalia	Arthropoda	Insecta	Hymenoptera	Formicidae	Rogeria		Rogeria Emery, 1894	Emery, 1894	Genus	Ant	Fernandes, I.O. | Souza, J.L.P.	1	Individual
PreservedSpecimen	Jaci-ParanáMD:Km3:2011:1	2017-09-13	Invertebrate Collection of INPA / Environmental monitoring of ants (Hymenoptera: Formicidae) in the influence areas of Santo Antônio Hydroelectric Power-Plant in Rondônia, Brazil		en	Instituto Nacional de Pesquisas da Amazônia (INPA)	INPA		Instituto Nacional de Pesquisas da Amazônia - INPA / Invertebrate Collection		BR:INPA:HYM:000560	Fernandes, I.O. | Souza, J.L.P.		female	adult	non-reprodutcive	alcohol	in collection / wet vial	Animalia	Arthropoda	Insecta	Hymenoptera	Formicidae	Rogeria		Rogeria Emery, 1894	Emery, 1894	Genus	Ant	Fernandes, I.O. | Souza, J.L.P.	1	Individual
PreservedSpecimen	Jaci-ParanáMD:Km4:2011:1	2017-09-13	Invertebrate Collection of INPA / Environmental monitoring of ants (Hymenoptera: Formicidae) in the influence areas of Santo Antônio Hydroelectric Power-Plant in Rondônia, Brazil		en	Instituto Nacional de Pesquisas da Amazônia (INPA)	INPA		Instituto Nacional de Pesquisas da Amazônia - INPA / Invertebrate Collection		BR:INPA:HYM:000561	Fernandes, I.O. | Souza, J.L.P.		female	adult	non-reprodutcive	alcohol	in collection / wet vial	Animalia	Arthropoda	Insecta	Hymenoptera	Formicidae	Rogeria		Rogeria Emery, 1894	Emery, 1894	Genus	Ant	Fernandes, I.O. | Souza, J.L.P.	1	Individual
PreservedSpecimen	IlhaPedras:km2:2011:1	2017-09-13	Invertebrate Collection of INPA / Environmental monitoring of ants (Hymenoptera: Formicidae) in the influence areas of Santo Antônio Hydroelectric Power-Plant in Rondônia, Brazil		en	Instituto Nacional de Pesquisas da Amazônia (INPA)	INPA		Instituto Nacional de Pesquisas da Amazônia - INPA / Invertebrate Collection		BR:INPA:HYM:000562	Fernandes, I.O. | Souza, J.L.P.		female	adult	non-reprodutcive	alcohol	in collection / wet vial	Animalia	Arthropoda	Insecta	Hymenoptera	Formicidae	Rogeria	cuneola	Rogeria cuneola Kugler, 1994	Kugler, 1994	Species	Ant	Fernandes, I.O. | Souza, J.L.P.	1	Individual
PreservedSpecimen	IlhaBúfalos:km0:2011:1	2017-09-13	Invertebrate Collection of INPA / Environmental monitoring of ants (Hymenoptera: Formicidae) in the influence areas of Santo Antônio Hydroelectric Power-Plant in Rondônia, Brazil		en	Instituto Nacional de Pesquisas da Amazônia (INPA)	INPA		Instituto Nacional de Pesquisas da Amazônia - INPA / Invertebrate Collection		BR:INPA:HYM:000563	Fernandes, I.O. | Souza, J.L.P.		female	adult	non-reprodutcive	alcohol	in collection / wet vial	Animalia	Arthropoda	Insecta	Hymenoptera	Formicidae	Sericomyrmex		Sericomyrmex Mayr, 1865	Mayr, 1865	Genus	Ant	Fernandes, I.O. | Souza, J.L.P.	1	Individual
PreservedSpecimen	IlhaBúfalos:km1:2011:1	2017-09-13	Invertebrate Collection of INPA / Environmental monitoring of ants (Hymenoptera: Formicidae) in the influence areas of Santo Antônio Hydroelectric Power-Plant in Rondônia, Brazil		en	Instituto Nacional de Pesquisas da Amazônia (INPA)	INPA		Instituto Nacional de Pesquisas da Amazônia - INPA / Invertebrate Collection		BR:INPA:HYM:000564	Fernandes, I.O. | Souza, J.L.P.		female	adult	non-reprodutcive	alcohol	in collection / wet vial	Animalia	Arthropoda	Insecta	Hymenoptera	Formicidae	Sericomyrmex		Sericomyrmex Mayr, 1865	Mayr, 1865	Genus	Ant	Fernandes, I.O. | Souza, J.L.P.	1	Individual
PreservedSpecimen	IlhaPedras:km2:2011:1	2017-09-13	Invertebrate Collection of INPA / Environmental monitoring of ants (Hymenoptera: Formicidae) in the influence areas of Santo Antônio Hydroelectric Power-Plant in Rondônia, Brazil		en	Instituto Nacional de Pesquisas da Amazônia (INPA)	INPA		Instituto Nacional de Pesquisas da Amazônia - INPA / Invertebrate Collection		BR:INPA:HYM:000565	Fernandes, I.O. | Souza, J.L.P.		female	adult	non-reprodutcive	alcohol	in collection / wet vial	Animalia	Arthropoda	Insecta	Hymenoptera	Formicidae	Sericomyrmex		Sericomyrmex Mayr, 1865	Mayr, 1865	Genus	Ant	Fernandes, I.O. | Souza, J.L.P.	1	Individual
PreservedSpecimen	Jaci-ParanáMD:Km2:2011:1	2017-09-13	Invertebrate Collection of INPA / Environmental monitoring of ants (Hymenoptera: Formicidae) in the influence areas of Santo Antônio Hydroelectric Power-Plant in Rondônia, Brazil		en	Instituto Nacional de Pesquisas da Amazônia (INPA)	INPA		Instituto Nacional de Pesquisas da Amazônia - INPA / Invertebrate Collection		BR:INPA:HYM:000566	Fernandes, I.O. | Souza, J.L.P.		female	adult	non-reprodutcive	alcohol	in collection / wet vial	Animalia	Arthropoda	Insecta	Hymenoptera	Formicidae	Sericomyrmex		Sericomyrmex Mayr, 1865	Mayr, 1865	Genus	Ant	Fernandes, I.O. | Souza, J.L.P.	1	Individual
PreservedSpecimen	Jaci-ParanáMD:Km0.5:2011:1	2017-09-13	Invertebrate Collection of INPA / Environmental monitoring of ants (Hymenoptera: Formicidae) in the influence areas of Santo Antônio Hydroelectric Power-Plant in Rondônia, Brazil		en	Instituto Nacional de Pesquisas da Amazônia (INPA)	INPA		Instituto Nacional de Pesquisas da Amazônia - INPA / Invertebrate Collection		BR:INPA:HYM:000567	Fernandes, I.O. | Souza, J.L.P.		female	adult	non-reprodutcive	alcohol	in collection / wet vial	Animalia	Arthropoda	Insecta	Hymenoptera	Formicidae	Sericomyrmex		Sericomyrmex Mayr, 1865	Mayr, 1865	Genus	Ant	Fernandes, I.O. | Souza, J.L.P.	1	Individual
PreservedSpecimen	IlhaPedras:km2:2011:1	2017-09-13	Invertebrate Collection of INPA / Environmental monitoring of ants (Hymenoptera: Formicidae) in the influence areas of Santo Antônio Hydroelectric Power-Plant in Rondônia, Brazil		en	Instituto Nacional de Pesquisas da Amazônia (INPA)	INPA		Instituto Nacional de Pesquisas da Amazônia - INPA / Invertebrate Collection		BR:INPA:HYM:000568	Fernandes, I.O. | Souza, J.L.P.		female	adult	non-reprodutcive	alcohol	in collection / wet vial	Animalia	Arthropoda	Insecta	Hymenoptera	Formicidae	Sericomyrmex		Sericomyrmex Mayr, 1865	Mayr, 1865	Genus	Ant	Fernandes, I.O. | Souza, J.L.P.	1	Individual
PreservedSpecimen	IlhaBúfalos:km0.5:2011:1	2017-09-13	Invertebrate Collection of INPA / Environmental monitoring of ants (Hymenoptera: Formicidae) in the influence areas of Santo Antônio Hydroelectric Power-Plant in Rondônia, Brazil		en	Instituto Nacional de Pesquisas da Amazônia (INPA)	INPA		Instituto Nacional de Pesquisas da Amazônia - INPA / Invertebrate Collection		BR:INPA:HYM:000569	Fernandes, I.O. | Souza, J.L.P.		female	adult	non-reprodutcive	alcohol	in collection / wet vial	Animalia	Arthropoda	Insecta	Hymenoptera	Formicidae	Solenopsis		Solenopsis Westwood, 1840	Westwood, 1840	Genus	Ant	Fernandes, I.O. | Souza, J.L.P.	1	Individual
PreservedSpecimen	Morrinhos:Km0.5:2011:1	2017-09-13	Invertebrate Collection of INPA / Environmental monitoring of ants (Hymenoptera: Formicidae) in the influence areas of Santo Antônio Hydroelectric Power-Plant in Rondônia, Brazil		en	Instituto Nacional de Pesquisas da Amazônia (INPA)	INPA		Instituto Nacional de Pesquisas da Amazônia - INPA / Invertebrate Collection		BR:INPA:HYM:000570	Fernandes, I.O. | Souza, J.L.P.		female	adult	non-reprodutcive	alcohol	in collection / wet vial	Animalia	Arthropoda	Insecta	Hymenoptera	Formicidae	Solenopsis		Solenopsis Westwood, 1840	Westwood, 1840	Genus	Ant	Fernandes, I.O. | Souza, J.L.P.	1	Individual
PreservedSpecimen	IlhaPedras:km1:2011:1	2017-09-13	Invertebrate Collection of INPA / Environmental monitoring of ants (Hymenoptera: Formicidae) in the influence areas of Santo Antônio Hydroelectric Power-Plant in Rondônia, Brazil		en	Instituto Nacional de Pesquisas da Amazônia (INPA)	INPA		Instituto Nacional de Pesquisas da Amazônia - INPA / Invertebrate Collection		BR:INPA:HYM:000571	Fernandes, I.O. | Souza, J.L.P.		female	adult	non-reprodutcive	alcohol	in collection / wet vial	Animalia	Arthropoda	Insecta	Hymenoptera	Formicidae	Solenopsis		Solenopsis Westwood, 1840	Westwood, 1840	Genus	Ant	Fernandes, I.O. | Souza, J.L.P.	1	Individual
PreservedSpecimen	Morrinhos:Km1:2011:1	2017-09-13	Invertebrate Collection of INPA / Environmental monitoring of ants (Hymenoptera: Formicidae) in the influence areas of Santo Antônio Hydroelectric Power-Plant in Rondônia, Brazil		en	Instituto Nacional de Pesquisas da Amazônia (INPA)	INPA		Instituto Nacional de Pesquisas da Amazônia - INPA / Invertebrate Collection		BR:INPA:HYM:000572	Fernandes, I.O. | Souza, J.L.P.		female	adult	non-reprodutcive	alcohol	in collection / wet vial	Animalia	Arthropoda	Insecta	Hymenoptera	Formicidae	Solenopsis		Solenopsis Westwood, 1840	Westwood, 1840	Genus	Ant	Fernandes, I.O. | Souza, J.L.P.	1	Individual
PreservedSpecimen	IlhaBúfalos:km0:2011:1	2017-09-13	Invertebrate Collection of INPA / Environmental monitoring of ants (Hymenoptera: Formicidae) in the influence areas of Santo Antônio Hydroelectric Power-Plant in Rondônia, Brazil		en	Instituto Nacional de Pesquisas da Amazônia (INPA)	INPA		Instituto Nacional de Pesquisas da Amazônia - INPA / Invertebrate Collection		BR:INPA:HYM:000573	Fernandes, I.O. | Souza, J.L.P.		female	adult	non-reprodutcive	alcohol	in collection / wet vial	Animalia	Arthropoda	Insecta	Hymenoptera	Formicidae	Solenopsis		Solenopsis Westwood, 1840	Westwood, 1840	Genus	Ant	Fernandes, I.O. | Souza, J.L.P.	1	Individual
PreservedSpecimen	Morrinhos:Km2:2011:1	2017-09-13	Invertebrate Collection of INPA / Environmental monitoring of ants (Hymenoptera: Formicidae) in the influence areas of Santo Antônio Hydroelectric Power-Plant in Rondônia, Brazil		en	Instituto Nacional de Pesquisas da Amazônia (INPA)	INPA		Instituto Nacional de Pesquisas da Amazônia - INPA / Invertebrate Collection		BR:INPA:HYM:000574	Fernandes, I.O. | Souza, J.L.P.		female	adult	non-reprodutcive	alcohol	in collection / wet vial	Animalia	Arthropoda	Insecta	Hymenoptera	Formicidae	Solenopsis		Solenopsis Westwood, 1840	Westwood, 1840	Genus	Ant	Fernandes, I.O. | Souza, J.L.P.	1	Individual
PreservedSpecimen	IlhaBúfalos:km3:2011:1	2017-09-13	Invertebrate Collection of INPA / Environmental monitoring of ants (Hymenoptera: Formicidae) in the influence areas of Santo Antônio Hydroelectric Power-Plant in Rondônia, Brazil		en	Instituto Nacional de Pesquisas da Amazônia (INPA)	INPA		Instituto Nacional de Pesquisas da Amazônia - INPA / Invertebrate Collection		BR:INPA:HYM:000575	Fernandes, I.O. | Souza, J.L.P.		female	adult	non-reprodutcive	alcohol	in collection / wet vial	Animalia	Arthropoda	Insecta	Hymenoptera	Formicidae	Solenopsis		Solenopsis Westwood, 1840	Westwood, 1840	Genus	Ant	Fernandes, I.O. | Souza, J.L.P.	1	Individual
PreservedSpecimen	Morrinhos:Km4:2011:1	2017-09-13	Invertebrate Collection of INPA / Environmental monitoring of ants (Hymenoptera: Formicidae) in the influence areas of Santo Antônio Hydroelectric Power-Plant in Rondônia, Brazil		en	Instituto Nacional de Pesquisas da Amazônia (INPA)	INPA		Instituto Nacional de Pesquisas da Amazônia - INPA / Invertebrate Collection		BR:INPA:HYM:000576	Fernandes, I.O. | Souza, J.L.P.		female	adult	non-reprodutcive	alcohol	in collection / wet vial	Animalia	Arthropoda	Insecta	Hymenoptera	Formicidae	Solenopsis		Solenopsis Westwood, 1840	Westwood, 1840	Genus	Ant	Fernandes, I.O. | Souza, J.L.P.	1	Individual
PreservedSpecimen	IlhaBúfalos:km0:2011:1	2017-09-13	Invertebrate Collection of INPA / Environmental monitoring of ants (Hymenoptera: Formicidae) in the influence areas of Santo Antônio Hydroelectric Power-Plant in Rondônia, Brazil		en	Instituto Nacional de Pesquisas da Amazônia (INPA)	INPA		Instituto Nacional de Pesquisas da Amazônia - INPA / Invertebrate Collection		BR:INPA:HYM:000577	Fernandes, I.O. | Souza, J.L.P.		female	adult	non-reprodutcive	alcohol	in collection / wet vial	Animalia	Arthropoda	Insecta	Hymenoptera	Formicidae	Solenopsis		Solenopsis Westwood, 1840	Westwood, 1840	Genus	Ant	Fernandes, I.O. | Souza, J.L.P.	1	Individual
PreservedSpecimen	Jaci-ParanáMD:Km0.5:2011:1	2017-09-13	Invertebrate Collection of INPA / Environmental monitoring of ants (Hymenoptera: Formicidae) in the influence areas of Santo Antônio Hydroelectric Power-Plant in Rondônia, Brazil		en	Instituto Nacional de Pesquisas da Amazônia (INPA)	INPA		Instituto Nacional de Pesquisas da Amazônia - INPA / Invertebrate Collection		BR:INPA:HYM:000578	Fernandes, I.O. | Souza, J.L.P.		female	adult	non-reprodutcive	alcohol	in collection / wet vial	Animalia	Arthropoda	Insecta	Hymenoptera	Formicidae	Solenopsis		Solenopsis Westwood, 1840	Westwood, 1840	Genus	Ant	Fernandes, I.O. | Souza, J.L.P.	1	Individual
PreservedSpecimen	IlhaBúfalos:km2:2011:1	2017-09-13	Invertebrate Collection of INPA / Environmental monitoring of ants (Hymenoptera: Formicidae) in the influence areas of Santo Antônio Hydroelectric Power-Plant in Rondônia, Brazil		en	Instituto Nacional de Pesquisas da Amazônia (INPA)	INPA		Instituto Nacional de Pesquisas da Amazônia - INPA / Invertebrate Collection		BR:INPA:HYM:000579	Fernandes, I.O. | Souza, J.L.P.		female	adult	non-reprodutcive	alcohol	in collection / wet vial	Animalia	Arthropoda	Insecta	Hymenoptera	Formicidae	Solenopsis		Solenopsis Westwood, 1840	Westwood, 1840	Genus	Ant	Fernandes, I.O. | Souza, J.L.P.	1	Individual
PreservedSpecimen	Jaci-ParanáMD:Km2:2011:1	2017-09-13	Invertebrate Collection of INPA / Environmental monitoring of ants (Hymenoptera: Formicidae) in the influence areas of Santo Antônio Hydroelectric Power-Plant in Rondônia, Brazil		en	Instituto Nacional de Pesquisas da Amazônia (INPA)	INPA		Instituto Nacional de Pesquisas da Amazônia - INPA / Invertebrate Collection		BR:INPA:HYM:000580	Fernandes, I.O. | Souza, J.L.P.		female	adult	non-reprodutcive	alcohol	in collection / wet vial	Animalia	Arthropoda	Insecta	Hymenoptera	Formicidae	Solenopsis		Solenopsis Westwood, 1840	Westwood, 1840	Genus	Ant	Fernandes, I.O. | Souza, J.L.P.	1	Individual
PreservedSpecimen	IlhaBúfalos:km3:2011:1	2017-09-13	Invertebrate Collection of INPA / Environmental monitoring of ants (Hymenoptera: Formicidae) in the influence areas of Santo Antônio Hydroelectric Power-Plant in Rondônia, Brazil		en	Instituto Nacional de Pesquisas da Amazônia (INPA)	INPA		Instituto Nacional de Pesquisas da Amazônia - INPA / Invertebrate Collection		BR:INPA:HYM:000581	Fernandes, I.O. | Souza, J.L.P.		female	adult	non-reprodutcive	alcohol	in collection / wet vial	Animalia	Arthropoda	Insecta	Hymenoptera	Formicidae	Solenopsis		Solenopsis Westwood, 1840	Westwood, 1840	Genus	Ant	Fernandes, I.O. | Souza, J.L.P.	1	Individual
PreservedSpecimen	Jaci-ParanáMD:Km3:2011:1	2017-09-13	Invertebrate Collection of INPA / Environmental monitoring of ants (Hymenoptera: Formicidae) in the influence areas of Santo Antônio Hydroelectric Power-Plant in Rondônia, Brazil		en	Instituto Nacional de Pesquisas da Amazônia (INPA)	INPA		Instituto Nacional de Pesquisas da Amazônia - INPA / Invertebrate Collection		BR:INPA:HYM:000582	Fernandes, I.O. | Souza, J.L.P.		female	adult	non-reprodutcive	alcohol	in collection / wet vial	Animalia	Arthropoda	Insecta	Hymenoptera	Formicidae	Solenopsis		Solenopsis Westwood, 1840	Westwood, 1840	Genus	Ant	Fernandes, I.O. | Souza, J.L.P.	1	Individual
PreservedSpecimen	Morrinhos:Km1:2011:1	2017-09-13	Invertebrate Collection of INPA / Environmental monitoring of ants (Hymenoptera: Formicidae) in the influence areas of Santo Antônio Hydroelectric Power-Plant in Rondônia, Brazil		en	Instituto Nacional de Pesquisas da Amazônia (INPA)	INPA		Instituto Nacional de Pesquisas da Amazônia - INPA / Invertebrate Collection		BR:INPA:HYM:000583	Fernandes, I.O. | Souza, J.L.P.		female	adult	non-reprodutcive	alcohol	in collection / wet vial	Animalia	Arthropoda	Insecta	Hymenoptera	Formicidae	Solenopsis		Solenopsis Westwood, 1840	Westwood, 1840	Genus	Ant	Fernandes, I.O. | Souza, J.L.P.	1	Individual
PreservedSpecimen	IlhaBúfalos:km2:2011:1	2017-09-13	Invertebrate Collection of INPA / Environmental monitoring of ants (Hymenoptera: Formicidae) in the influence areas of Santo Antônio Hydroelectric Power-Plant in Rondônia, Brazil		en	Instituto Nacional de Pesquisas da Amazônia (INPA)	INPA		Instituto Nacional de Pesquisas da Amazônia - INPA / Invertebrate Collection		BR:INPA:HYM:000584	Fernandes, I.O. | Souza, J.L.P.		female	adult	non-reprodutcive	alcohol	in collection / wet vial	Animalia	Arthropoda	Insecta	Hymenoptera	Formicidae	Solenopsis		Solenopsis Westwood, 1840	Westwood, 1840	Genus	Ant	Fernandes, I.O. | Souza, J.L.P.	1	Individual
PreservedSpecimen	IlhaBúfalos:km3:2011:1	2017-09-13	Invertebrate Collection of INPA / Environmental monitoring of ants (Hymenoptera: Formicidae) in the influence areas of Santo Antônio Hydroelectric Power-Plant in Rondônia, Brazil		en	Instituto Nacional de Pesquisas da Amazônia (INPA)	INPA		Instituto Nacional de Pesquisas da Amazônia - INPA / Invertebrate Collection		BR:INPA:HYM:000585	Fernandes, I.O. | Souza, J.L.P.		female	adult	non-reprodutcive	alcohol	in collection / wet vial	Animalia	Arthropoda	Insecta	Hymenoptera	Formicidae	Solenopsis		Solenopsis Westwood, 1840	Westwood, 1840	Genus	Ant	Fernandes, I.O. | Souza, J.L.P.	1	Individual
PreservedSpecimen	IlhaBúfalos:km0:2011:1	2017-09-13	Invertebrate Collection of INPA / Environmental monitoring of ants (Hymenoptera: Formicidae) in the influence areas of Santo Antônio Hydroelectric Power-Plant in Rondônia, Brazil		en	Instituto Nacional de Pesquisas da Amazônia (INPA)	INPA		Instituto Nacional de Pesquisas da Amazônia - INPA / Invertebrate Collection		BR:INPA:HYM:000586	Fernandes, I.O. | Souza, J.L.P.		female	adult	non-reprodutcive	alcohol	in collection / wet vial	Animalia	Arthropoda	Insecta	Hymenoptera	Formicidae	Solenopsis		Solenopsis Westwood, 1840	Westwood, 1840	Genus	Ant	Fernandes, I.O. | Souza, J.L.P.	1	Individual
PreservedSpecimen	Morrinhos:Km0:2011:1	2017-09-13	Invertebrate Collection of INPA / Environmental monitoring of ants (Hymenoptera: Formicidae) in the influence areas of Santo Antônio Hydroelectric Power-Plant in Rondônia, Brazil		en	Instituto Nacional de Pesquisas da Amazônia (INPA)	INPA		Instituto Nacional de Pesquisas da Amazônia - INPA / Invertebrate Collection		BR:INPA:HYM:000587	Fernandes, I.O. | Souza, J.L.P.		female	adult	non-reprodutcive	alcohol	in collection / wet vial	Animalia	Arthropoda	Insecta	Hymenoptera	Formicidae	Solenopsis		Solenopsis Westwood, 1840	Westwood, 1840	Genus	Ant	Fernandes, I.O. | Souza, J.L.P.	1	Individual
PreservedSpecimen	IlhaBúfalos:km0.5:2011:1	2017-09-13	Invertebrate Collection of INPA / Environmental monitoring of ants (Hymenoptera: Formicidae) in the influence areas of Santo Antônio Hydroelectric Power-Plant in Rondônia, Brazil		en	Instituto Nacional de Pesquisas da Amazônia (INPA)	INPA		Instituto Nacional de Pesquisas da Amazônia - INPA / Invertebrate Collection		BR:INPA:HYM:000588	Fernandes, I.O. | Souza, J.L.P.		female	adult	non-reprodutcive	alcohol	in collection / wet vial	Animalia	Arthropoda	Insecta	Hymenoptera	Formicidae	Solenopsis		Solenopsis Westwood, 1840	Westwood, 1840	Genus	Ant	Fernandes, I.O. | Souza, J.L.P.	1	Individual
PreservedSpecimen	IlhaBúfalos:km1:2011:1	2017-09-13	Invertebrate Collection of INPA / Environmental monitoring of ants (Hymenoptera: Formicidae) in the influence areas of Santo Antônio Hydroelectric Power-Plant in Rondônia, Brazil		en	Instituto Nacional de Pesquisas da Amazônia (INPA)	INPA		Instituto Nacional de Pesquisas da Amazônia - INPA / Invertebrate Collection		BR:INPA:HYM:000589	Fernandes, I.O. | Souza, J.L.P.		female	adult	non-reprodutcive	alcohol	in collection / wet vial	Animalia	Arthropoda	Insecta	Hymenoptera	Formicidae	Solenopsis		Solenopsis Westwood, 1840	Westwood, 1840	Genus	Ant	Fernandes, I.O. | Souza, J.L.P.	1	Individual
PreservedSpecimen	Jaci-ParanáMD:Km1:2011:1	2017-09-13	Invertebrate Collection of INPA / Environmental monitoring of ants (Hymenoptera: Formicidae) in the influence areas of Santo Antônio Hydroelectric Power-Plant in Rondônia, Brazil		en	Instituto Nacional de Pesquisas da Amazônia (INPA)	INPA		Instituto Nacional de Pesquisas da Amazônia - INPA / Invertebrate Collection		BR:INPA:HYM:000590	Fernandes, I.O. | Souza, J.L.P.		female	adult	non-reprodutcive	alcohol	in collection / wet vial	Animalia	Arthropoda	Insecta	Hymenoptera	Formicidae	Solenopsis		Solenopsis Westwood, 1840	Westwood, 1840	Genus	Ant	Fernandes, I.O. | Souza, J.L.P.	1	Individual
PreservedSpecimen	Jaci-ParanáMD:Km2:2011:1	2017-09-13	Invertebrate Collection of INPA / Environmental monitoring of ants (Hymenoptera: Formicidae) in the influence areas of Santo Antônio Hydroelectric Power-Plant in Rondônia, Brazil		en	Instituto Nacional de Pesquisas da Amazônia (INPA)	INPA		Instituto Nacional de Pesquisas da Amazônia - INPA / Invertebrate Collection		BR:INPA:HYM:000591	Fernandes, I.O. | Souza, J.L.P.		female	adult	non-reprodutcive	alcohol	in collection / wet vial	Animalia	Arthropoda	Insecta	Hymenoptera	Formicidae	Solenopsis		Solenopsis Westwood, 1840	Westwood, 1840	Genus	Ant	Fernandes, I.O. | Souza, J.L.P.	1	Individual
PreservedSpecimen	IlhaPedras:km3:2011:1	2017-09-13	Invertebrate Collection of INPA / Environmental monitoring of ants (Hymenoptera: Formicidae) in the influence areas of Santo Antônio Hydroelectric Power-Plant in Rondônia, Brazil		en	Instituto Nacional de Pesquisas da Amazônia (INPA)	INPA		Instituto Nacional de Pesquisas da Amazônia - INPA / Invertebrate Collection		BR:INPA:HYM:000592	Fernandes, I.O. | Souza, J.L.P.		female	adult	non-reprodutcive	alcohol	in collection / wet vial	Animalia	Arthropoda	Insecta	Hymenoptera	Formicidae	Solenopsis		Solenopsis Westwood, 1840	Westwood, 1840	Genus	Ant	Fernandes, I.O. | Souza, J.L.P.	1	Individual
PreservedSpecimen	IlhaPedras:km4:2011:1	2017-09-13	Invertebrate Collection of INPA / Environmental monitoring of ants (Hymenoptera: Formicidae) in the influence areas of Santo Antônio Hydroelectric Power-Plant in Rondônia, Brazil		en	Instituto Nacional de Pesquisas da Amazônia (INPA)	INPA		Instituto Nacional de Pesquisas da Amazônia - INPA / Invertebrate Collection		BR:INPA:HYM:000593	Fernandes, I.O. | Souza, J.L.P.		female	adult	non-reprodutcive	alcohol	in collection / wet vial	Animalia	Arthropoda	Insecta	Hymenoptera	Formicidae	Solenopsis		Solenopsis Westwood, 1840	Westwood, 1840	Genus	Ant	Fernandes, I.O. | Souza, J.L.P.	1	Individual
PreservedSpecimen	Jaci-ParanáMD:Km0:2011:1	2017-09-13	Invertebrate Collection of INPA / Environmental monitoring of ants (Hymenoptera: Formicidae) in the influence areas of Santo Antônio Hydroelectric Power-Plant in Rondônia, Brazil		en	Instituto Nacional de Pesquisas da Amazônia (INPA)	INPA		Instituto Nacional de Pesquisas da Amazônia - INPA / Invertebrate Collection		BR:INPA:HYM:000594	Fernandes, I.O. | Souza, J.L.P.		female	adult	non-reprodutcive	alcohol	in collection / wet vial	Animalia	Arthropoda	Insecta	Hymenoptera	Formicidae	Solenopsis		Solenopsis Westwood, 1840	Westwood, 1840	Genus	Ant	Fernandes, I.O. | Souza, J.L.P.	1	Individual
PreservedSpecimen	IlhaBúfalos:km0.5:2011:1	2017-09-13	Invertebrate Collection of INPA / Environmental monitoring of ants (Hymenoptera: Formicidae) in the influence areas of Santo Antônio Hydroelectric Power-Plant in Rondônia, Brazil		en	Instituto Nacional de Pesquisas da Amazônia (INPA)	INPA		Instituto Nacional de Pesquisas da Amazônia - INPA / Invertebrate Collection		BR:INPA:HYM:000595	Fernandes, I.O. | Souza, J.L.P.		female	adult	non-reprodutcive	alcohol	in collection / wet vial	Animalia	Arthropoda	Insecta	Hymenoptera	Formicidae	Solenopsis		Solenopsis Westwood, 1840	Westwood, 1840	Genus	Ant	Fernandes, I.O. | Souza, J.L.P.	1	Individual
PreservedSpecimen	IlhaPedras:km0.5:2011:1	2017-09-13	Invertebrate Collection of INPA / Environmental monitoring of ants (Hymenoptera: Formicidae) in the influence areas of Santo Antônio Hydroelectric Power-Plant in Rondônia, Brazil		en	Instituto Nacional de Pesquisas da Amazônia (INPA)	INPA		Instituto Nacional de Pesquisas da Amazônia - INPA / Invertebrate Collection		BR:INPA:HYM:000596	Fernandes, I.O. | Souza, J.L.P.		female	adult	non-reprodutcive	alcohol	in collection / wet vial	Animalia	Arthropoda	Insecta	Hymenoptera	Formicidae	Solenopsis		Solenopsis Westwood, 1840	Westwood, 1840	Genus	Ant	Fernandes, I.O. | Souza, J.L.P.	1	Individual
PreservedSpecimen	IlhaBúfalos:km1:2011:1	2017-09-13	Invertebrate Collection of INPA / Environmental monitoring of ants (Hymenoptera: Formicidae) in the influence areas of Santo Antônio Hydroelectric Power-Plant in Rondônia, Brazil		en	Instituto Nacional de Pesquisas da Amazônia (INPA)	INPA		Instituto Nacional de Pesquisas da Amazônia - INPA / Invertebrate Collection		BR:INPA:HYM:000597	Fernandes, I.O. | Souza, J.L.P.		female	adult	non-reprodutcive	alcohol	in collection / wet vial	Animalia	Arthropoda	Insecta	Hymenoptera	Formicidae	Solenopsis		Solenopsis Westwood, 1840	Westwood, 1840	Genus	Ant	Fernandes, I.O. | Souza, J.L.P.	1	Individual
PreservedSpecimen	IlhaPedras:km1:2011:1	2017-09-13	Invertebrate Collection of INPA / Environmental monitoring of ants (Hymenoptera: Formicidae) in the influence areas of Santo Antônio Hydroelectric Power-Plant in Rondônia, Brazil		en	Instituto Nacional de Pesquisas da Amazônia (INPA)	INPA		Instituto Nacional de Pesquisas da Amazônia - INPA / Invertebrate Collection		BR:INPA:HYM:000598	Fernandes, I.O. | Souza, J.L.P.		female	adult	non-reprodutcive	alcohol	in collection / wet vial	Animalia	Arthropoda	Insecta	Hymenoptera	Formicidae	Solenopsis		Solenopsis Westwood, 1840	Westwood, 1840	Genus	Ant	Fernandes, I.O. | Souza, J.L.P.	1	Individual
PreservedSpecimen	Jaci-ParanáMD:Km1:2011:1	2017-09-13	Invertebrate Collection of INPA / Environmental monitoring of ants (Hymenoptera: Formicidae) in the influence areas of Santo Antônio Hydroelectric Power-Plant in Rondônia, Brazil		en	Instituto Nacional de Pesquisas da Amazônia (INPA)	INPA		Instituto Nacional de Pesquisas da Amazônia - INPA / Invertebrate Collection		BR:INPA:HYM:000599	Fernandes, I.O. | Souza, J.L.P.		female	adult	non-reprodutcive	alcohol	in collection / wet vial	Animalia	Arthropoda	Insecta	Hymenoptera	Formicidae	Solenopsis		Solenopsis Westwood, 1840	Westwood, 1840	Genus	Ant	Fernandes, I.O. | Souza, J.L.P.	1	Individual
PreservedSpecimen	IlhaPedras:km2:2011:1	2017-09-13	Invertebrate Collection of INPA / Environmental monitoring of ants (Hymenoptera: Formicidae) in the influence areas of Santo Antônio Hydroelectric Power-Plant in Rondônia, Brazil		en	Instituto Nacional de Pesquisas da Amazônia (INPA)	INPA		Instituto Nacional de Pesquisas da Amazônia - INPA / Invertebrate Collection		BR:INPA:HYM:000600	Fernandes, I.O. | Souza, J.L.P.		female	adult	non-reprodutcive	alcohol	in collection / wet vial	Animalia	Arthropoda	Insecta	Hymenoptera	Formicidae	Solenopsis		Solenopsis Westwood, 1840	Westwood, 1840	Genus	Ant	Fernandes, I.O. | Souza, J.L.P.	1	Individual
PreservedSpecimen	IlhaPedras:km3:2011:1	2017-09-13	Invertebrate Collection of INPA / Environmental monitoring of ants (Hymenoptera: Formicidae) in the influence areas of Santo Antônio Hydroelectric Power-Plant in Rondônia, Brazil		en	Instituto Nacional de Pesquisas da Amazônia (INPA)	INPA		Instituto Nacional de Pesquisas da Amazônia - INPA / Invertebrate Collection		BR:INPA:HYM:000601	Fernandes, I.O. | Souza, J.L.P.		female	adult	non-reprodutcive	alcohol	in collection / wet vial	Animalia	Arthropoda	Insecta	Hymenoptera	Formicidae	Solenopsis		Solenopsis Westwood, 1840	Westwood, 1840	Genus	Ant	Fernandes, I.O. | Souza, J.L.P.	1	Individual
PreservedSpecimen	Jaci-ParanáMD:Km3:2011:1	2017-09-13	Invertebrate Collection of INPA / Environmental monitoring of ants (Hymenoptera: Formicidae) in the influence areas of Santo Antônio Hydroelectric Power-Plant in Rondônia, Brazil		en	Instituto Nacional de Pesquisas da Amazônia (INPA)	INPA		Instituto Nacional de Pesquisas da Amazônia - INPA / Invertebrate Collection		BR:INPA:HYM:000602	Fernandes, I.O. | Souza, J.L.P.		female	adult	non-reprodutcive	alcohol	in collection / wet vial	Animalia	Arthropoda	Insecta	Hymenoptera	Formicidae	Solenopsis		Solenopsis Westwood, 1840	Westwood, 1840	Genus	Ant	Fernandes, I.O. | Souza, J.L.P.	1	Individual
PreservedSpecimen	IlhaBúfalos:km4:2011:1	2017-09-13	Invertebrate Collection of INPA / Environmental monitoring of ants (Hymenoptera: Formicidae) in the influence areas of Santo Antônio Hydroelectric Power-Plant in Rondônia, Brazil		en	Instituto Nacional de Pesquisas da Amazônia (INPA)	INPA		Instituto Nacional de Pesquisas da Amazônia - INPA / Invertebrate Collection		BR:INPA:HYM:000603	Fernandes, I.O. | Souza, J.L.P.		female	adult	non-reprodutcive	alcohol	in collection / wet vial	Animalia	Arthropoda	Insecta	Hymenoptera	Formicidae	Solenopsis		Solenopsis Westwood, 1840	Westwood, 1840	Genus	Ant	Fernandes, I.O. | Souza, J.L.P.	1	Individual
PreservedSpecimen	IlhaPedras:km4:2011:1	2017-09-13	Invertebrate Collection of INPA / Environmental monitoring of ants (Hymenoptera: Formicidae) in the influence areas of Santo Antônio Hydroelectric Power-Plant in Rondônia, Brazil		en	Instituto Nacional de Pesquisas da Amazônia (INPA)	INPA		Instituto Nacional de Pesquisas da Amazônia - INPA / Invertebrate Collection		BR:INPA:HYM:000604	Fernandes, I.O. | Souza, J.L.P.		female	adult	non-reprodutcive	alcohol	in collection / wet vial	Animalia	Arthropoda	Insecta	Hymenoptera	Formicidae	Solenopsis		Solenopsis Westwood, 1840	Westwood, 1840	Genus	Ant	Fernandes, I.O. | Souza, J.L.P.	1	Individual
PreservedSpecimen	Jaci-ParanáMD:Km4:2011:1	2017-09-13	Invertebrate Collection of INPA / Environmental monitoring of ants (Hymenoptera: Formicidae) in the influence areas of Santo Antônio Hydroelectric Power-Plant in Rondônia, Brazil		en	Instituto Nacional de Pesquisas da Amazônia (INPA)	INPA		Instituto Nacional de Pesquisas da Amazônia - INPA / Invertebrate Collection		BR:INPA:HYM:000605	Fernandes, I.O. | Souza, J.L.P.		female	adult	non-reprodutcive	alcohol	in collection / wet vial	Animalia	Arthropoda	Insecta	Hymenoptera	Formicidae	Solenopsis		Solenopsis Westwood, 1840	Westwood, 1840	Genus	Ant	Fernandes, I.O. | Souza, J.L.P.	1	Individual
PreservedSpecimen	Jaci-ParanáMD:Km0:2011:1	2017-09-13	Invertebrate Collection of INPA / Environmental monitoring of ants (Hymenoptera: Formicidae) in the influence areas of Santo Antônio Hydroelectric Power-Plant in Rondônia, Brazil		en	Instituto Nacional de Pesquisas da Amazônia (INPA)	INPA		Instituto Nacional de Pesquisas da Amazônia - INPA / Invertebrate Collection		BR:INPA:HYM:000606	Fernandes, I.O. | Souza, J.L.P.		female	adult	non-reprodutcive	alcohol	in collection / wet vial	Animalia	Arthropoda	Insecta	Hymenoptera	Formicidae	Solenopsis		Solenopsis Westwood, 1840	Westwood, 1840	Genus	Ant	Fernandes, I.O. | Souza, J.L.P.	1	Individual
PreservedSpecimen	IlhaBúfalos:km0.5:2011:1	2017-09-13	Invertebrate Collection of INPA / Environmental monitoring of ants (Hymenoptera: Formicidae) in the influence areas of Santo Antônio Hydroelectric Power-Plant in Rondônia, Brazil		en	Instituto Nacional de Pesquisas da Amazônia (INPA)	INPA		Instituto Nacional de Pesquisas da Amazônia - INPA / Invertebrate Collection		BR:INPA:HYM:000607	Fernandes, I.O. | Souza, J.L.P.		female	adult	non-reprodutcive	alcohol	in collection / wet vial	Animalia	Arthropoda	Insecta	Hymenoptera	Formicidae	Solenopsis		Solenopsis Westwood, 1840	Westwood, 1840	Genus	Ant	Fernandes, I.O. | Souza, J.L.P.	1	Individual
[truncated: 8,558 more rows]
